# Supplementary material for: Genome-Wide Profiling of Pluripotent Cells Reveals a Unique Molecular Signature of Human Embryonic Germ Cells
Source: PLoS One. 2012 Jun 21;7(6):e39088. doi: 10.1371/journal.pone.0039088 (PMC3380858; doi:10.1371/journal.pone.0039088)
Supplement: Table S1 — The real-time qRT-PCR analysis data for the detection of OCT4 , SOX2 , NANOG and DNMT3B . (XLS) [file pone.0039088.s001.xls]

## Sheet: Sheet1
Primer List	Gene Symbol	Gene Name	Assay ID	RefSeq	Gene Bank mRNA	Species
	POU5F1B (OCT4)	POU class 5 homeobox 1B	Hs01596605_s1*	NM_001159542.1	DQ486513.1	Homo sapiens
	SOX2	SRY (sex determining region Y)-box 2	Hs01053049_s1*	NM_003106.2	2 GenBank mRNAs	Homo sapiens
	NANOG	Nanog homeobox	Hs02387400_g1*	NM_024865.2	5 GenBank mRNAs	Homo sapiens
	DNMT3B	DNA (cytosine-5-)-methyltransferase 3 beta	Hs00171876_m1*	4 RefSeqs	11 GenBank mRNAs	Homo sapiens
	DDX4 (VASA)	DEAD (Asp-Glu-Ala-Asp) box polypeptide 4	Hs00987125_m1*	4 RefSeqs	8 GenBank mRNAs	Homo sapiens
