# Supplementary material for: Genome-Wide Profiling of Pluripotent Cells Reveals a Unique Molecular Signature of Human Embryonic Germ Cells
Source: PLoS One. 2012 Jun 21;7(6):e39088. doi: 10.1371/journal.pone.0039088 (PMC3380858; doi:10.1371/journal.pone.0039088)
Supplement: Table S2 — Details of the cells used in this study. (XLS) [file pone.0039088.s002.xls]

## Sheet: Sheet1
Cell Type	Line Name	Sex	Passage	Origin of Human Cell Lines	Experiment
ESC cells
	ESC1	XY	24	H1, WA01 Fed ID# 0043 from WiCell	Microarray Analysis
	ESC2	XY	24	H1, WA01 Fed ID# 0043 from WiCell	qRT-PCR
	ESC3	XY	24	H1, WA01 Fed ID# 0043 from WiCell	qRT-PCR
	ESC4	XY	27	H1, WA01 Fed ID# 0043 from WiCell	qRT-PCR
EGC cells
	EGC1	XX	15	SSEA1+ PGCs from a single gonad and cultured	Microarray Analysis
	EGC2	XY	18	SSEA1+ PGCs from a single gonad and cultured	Microarray Analysis
	EGC3	XX	17	SSEA1+ PGCs from a single gonad and cultured	Microarray Analysis
	EGC4	XX	15	SSEA1+ PGCs from a single gonad and cultured	qRT-PCR
	EGC5	XX	15	SSEA1+ PGCs from a single gonad and cultured	qRT-PCR
	EGC6	XX	15	SSEA1+ PGCs from a single gonad and cultured	qRT-PCR
ECC cells
	ECC1	XY	20	NTERA-2 cl.D1	Microarray Analysis
	ECC2	XY	18	Tera-2	Microarray Analysis
	ECC3	XY	18	NTERA-2 cl.D1	qRT-PCR
	ECC4	XY	18	NTERA-2 cl.D1	qRT-PCR
	ECC5	XY	19	Tera-2	qRT-PCR
IPSC cells
	IPSC1	XX	18	Lentiviral production and PGC transduction	Microarray Analysis
	IPSC2	XY	18	Lentiviral production and PGC transduction	Microarray Analysis
	IPSC3	XX	20	Lentiviral production and PGC transduction	Microarray Analysis
	IPSC4	XX	20	Lentiviral production and PGC transduction	qRT-PCR
	IPSC5	XX	20	Lentiviral production and PGC transduction	qRT-PCR
	IPSC6	XX	19	Lentiviral production and PGC transduction	qRT-PCR
PGC cells
	PGC1	XX	0	SSEA1+ PGCs from a single gonad	Microarray Analysis
	PGC2	XY	0	SSEA1+ PGCs from a single gonad	Microarray Analysis
	PGC3	XX	0	SSEA+ PGCs deom a single gonad	qRT-PCR
	PGC4	XX	0	SSEA+ PGCs deom a single gonad	qRT-PCR
	PGC5	XX	0	SSEA+ PGCs deom a single gonad	qRT-PCR
