# Supplementary material for: Genome-Wide Profiling of Pluripotent Cells Reveals a Unique Molecular Signature of Human Embryonic Germ Cells
Source: PLoS One. 2012 Jun 21;7(6):e39088. doi: 10.1371/journal.pone.0039088 (PMC3380858; doi:10.1371/journal.pone.0039088)
Supplement: Table S4 — The most highly differentially expressed genes (1000 of 54,000 or 1.85% genes in the array) represented by the red circles in Figure 3C . These genes are compared to the overall mean across all cell lines with FDR adjusted P<0.0001. (XLSX) [file pone.0039088.s004.xlsx]

## Sheet: Sheet1
ProbeSetID	PC1	PC2	PC	PC4	PC5	PC6	PC7	PC8	PC9	PC10	PC11	EGCvsREF	ESCvsREF	PGCvsREF	ECCvsREF	IPSCvsREF	AveExpr	F	P.Value	adj.P.Val	Representative.Public.ID	Gene.Title	Gene.Symbol	Entrez.Gene	PC3
1552485_at	0.0054386	0.00431197	0.00294168	-0.00387807	0.000312797	-0.000236329	-0.000402499	7.09296e-07	0.00210016	0.000425716	-0.00111848	-1.27485	0.218625	-1.28598	0.0535339	2.02361	5.72699	55.9417	1.33582e-06	9.85853e-05	NM_171846	lactamase, beta	LACTB	114294	-0.00294168
1552580_at	0.00308255	-0.00786366	-0.00520623	0.00235955	0.00283971	0.000425214	-0.00204556	0.00123831	-0.00028783	-0.000611767	-0.000238386	-0.718314	1.53952	-0.91897	2.7125	-0.990548	5.54907	128.305	3.26836e-08	1.55213e-05	NM_173553	tripartite motif family-like 2	TRIML2	205860	0.00520623
1552619_a_at	0.00601688	-0.0017996	-0.00230701	0.000589313	0.00413473	0.000159974	-6.13981e-05	0.000920075	-0.000526223	0.000267658	-0.000151183	-1.96417	0.701543	-2.39716	3.18547	1.20478	6.80857	122.029	4.09839e-08	1.69565e-05	NM_018685	anillin, actin binding protein	ANLN	54443	0.00230701
1552625_a_at	0.00560828	0.00435074	0.000292076	-0.000983334	0.00366774	-0.00110674	-0.000987556	0.000893637	-2.19272e-05	-0.00358437	8.0024e-05	-0.898982	-0.565974	-1.42169	0.670038	1.58874	6.35073	51.9732	1.8472e-06	0.000114119	AB063105	tRNA nucleotidyl transferase, CCA-adding, 1	TRNT1	51095	-0.000292076
1552897_a_at	0.00296662	-0.00812287	-0.00511771	0.00212732	0.00120677	0.00138201	-0.00158078	0.00232303	-0.00237177	6.70246e-05	0.000521992	-0.873904	2.27134	-1.01602	3.1204	-1.28613	5.03191	163.635	1.08759e-08	9.0991e-06	NM_133329	potassium voltage-gated channel, subfamily G, member 3	KCNG3	170850	0.00511771
1552899_at	-0.00370917	-0.0038397	0.00898841	0.00306005	-0.000840475	-0.0011788	0.00405955	-0.000246035	-0.00114947	-0.000106423	0.0016252	-0.30009	-0.216545	1.88114	-0.45809	-0.57643	4.15315	50.9125	2.02247e-06	0.000119247	NM_153224	hypothetical protein MGC34034	MGC34034	154089	-0.00898841
1553185_at	0.00216978	-0.00966143	0.000620623	0.00186135	-0.00171341	0.0021852	0.000390563	0.00217152	4.47782e-05	0.000370733	0.000171285	-1.42592	2.67325	0.576053	2.0931	-1.24459	9.13909	135.29	2.57246e-08	1.37735e-05	NM_152573	RAS and EF-hand domain containing	RASEF	158158	-0.000620623
1553276_at	0.00327244	-0.00805092	-0.00473887	0.0016909	0.00105791	0.00131842	-0.00159882	0.00133023	-0.00220918	0.000422074	0.00131894	-0.620464	1.49158	-0.658203	1.92038	-0.718182	4.06127	92.5729	1.41979e-07	2.98045e-05	NM_152476	zinc finger protein 560	ZNF560	147741	0.00473887
1553645_at	0.00297257	-0.00840981	-0.00418009	0.00278604	0.001874	0.000662472	-0.00128487	0.0015931	7.88232e-05	0.000617665	0.000399676	-0.845548	1.65105	-0.60674	2.62881	-1.05285	4.63867	162.415	1.12513e-08	9.17116e-06	NM_173648	coiled-coil domain containing 141	CCDC141	285025	0.00418009
1553798_a_at	0.00307425	0.00737724	0.00509289	-0.00491711	0.00282192	0.000273005	-0.00121159	0.00177413	-0.00156687	-0.000201082	0.000864053	-0.901333	-0.88942	-0.903125	-1.14106	2.5606	5.11722	63.8661	7.43479e-07	7.36908e-05	NM_145032	F-box and leucine-rich repeat protein 13	FBXL13	222235	-0.00509289
1553874_a_at	0.00331952	-0.0077116	-0.00376923	-0.00178914	-0.00248336	0.00374588	-0.00415107	0.00195608	-0.000950567	-5.15933e-05	0.00081836	-0.851178	3.22407	-1.00176	1.7793	-0.74187	5.8366	98.6348	1.06814e-07	2.55852e-05	NM_032805	zinc finger and SCAN domain containing 10	ZSCAN10	84891	0.00376923
1553875_s_at	0.00143447	-0.0087034	-0.00569005	-0.00188769	-0.00149087	0.00270933	-0.00362226	0.00231728	-0.000929914	-0.00340761	-0.000358001	-0.207316	2.24284	-0.583913	1.28412	-1.0071	6.19159	49.9999	2.1897e-06	0.000123157	NM_032805	zinc finger and SCAN domain containing 10	ZSCAN10	84891	0.00569005
1553972_a_at	0.00582176	-0.00256518	-0.000378761	-0.0033966	0.00390157	0.000161617	-0.00156908	0.00257934	-0.000179069	-0.000142803	-0.00105903	-2.02629	1.76733	-1.89235	2.21393	1.22279	8.82173	84.2337	2.1668e-07	3.9184e-05	BC007257	cystathionine-beta-synthase	CBS	875	0.000378761
1553974_at	0.0055738	0.00114278	0.0045875	0.000651772	0.00529014	-0.00183845	-0.000414654	0.00221174	-0.000725996	0.000273281	-4.30045e-05	-1.86253	-0.589822	-0.645235	1.23613	1.66521	6.56831	68.0695	5.60262e-07	6.45519e-05	BC030758	chromosome 22 open reading frame 39	C22orf39	128977	-0.0045875
1554001_at	0.00469285	-0.00625751	0.000197053	-0.00422031	-0.00163197	0.00299108	-0.000265059	0.0018262	0.000465528	-0.000289736	0.00103542	-1.02842	1.95806	-0.490901	0.935238	0.0795113	5.46635	58.258	1.11674e-06	8.94789e-05	BC036012	tripartite motif-containing 37	TRIM37	4591	-0.000197053
1554007_at	0.00453439	-0.00703629	-0.00260837	-0.000247414	0.00149836	0.00174155	-0.000872289	-0.000172914	-0.000552583	0.00028216	0.000119013	-1.96849	3.23226	-1.479	3.55531	-0.493132	9.13634	113.899	5.59223e-08	1.88524e-05	BC036488	---	---		0.00260837
1554239_s_at	-0.000100263	0.00965041	0.00479483	-0.000903205	0.00181292	-0.00266735	-0.000157719	9.89074e-05	0.00132048	0.000762171	-0.000922599	0.10281	-1.63396	-0.022391	-1.1495	1.22311	6.98854	56.6989	1.25888e-06	9.61552e-05	BC033780	zinc binding alcohol dehydrogenase domain containing 2	ZADH2	284273	-0.00479483
1554242_a_at	0.00556494	0.00337933	0.00296246	-0.00266455	0.00397927	-0.00158108	-0.000463005	0.00169967	0.000529183	-0.000555501	0.000740151	-2.23887	-0.487709	-1.90268	0.947436	3.03827	6.35747	241.271	1.86365e-09	4.63466e-06	BC007230	coagulation factor C homolog, cochlin (Limulus polyphemus)	COCH	1690	-0.00296246
1554340_a_at	0.00298949	-0.00821028	-0.00454216	0.00239535	0.00251598	0.00100171	-0.00123215	0.00218357	0.00153143	0.00157337	-0.000321445	-0.845622	1.70459	-0.758202	2.77414	-1.06653	4.38507	109.341	6.72109e-08	2.0334e-05	BC021286	chromosome 1 open reading frame 187	C1orf187	374946	0.00454216
1554599_x_at	0.00586498	-0.00253579	-0.00223681	-0.000507143	0.00457368	-0.000795834	0.000397706	0.00102465	0.000697537	0.00163552	0.000268722	-1.14386	0.541728	-1.29574	1.8201	0.613705	7.54861	72.8609	4.13966e-07	5.62655e-05	BC016767	---	---		0.00223681
1554628_at	0.00543907	-0.00467856	-0.00248583	-0.000698303	0.00288724	-0.000690914	-0.00278992	0.000416015	-0.000931077	-0.000204414	0.00156364	-0.929365	1.03728	-0.993831	1.57135	0.198595	6.24035	49.8973	2.20953e-06	0.00012389	BC028974	zinc finger protein 57	ZNF57	126295	0.00248583
1554703_at	0.00416257	-0.007649	-0.00180244	-0.00258943	-0.00134524	-6.67109e-05	-0.000689653	0.000754494	0.000324931	-0.000527734	5.04459e-05	-1.50453	3.14479	-0.851566	2.15514	-0.412782	6.24602	58.1022	1.13003e-06	8.94789e-05	BC040474	Rho guanine nucleotide exchange factor (GEF) 10	ARHGEF10	9639	0.00180244
1554768_a_at	0.00567283	0.00327642	-0.000557629	0.000506773	0.00584167	-0.000722935	-0.00040843	6.4805e-05	-0.000782088	-0.000204088	-0.000377797	-1.6229	-1.41764	-2.55516	1.96087	2.49164	7.90065	79.2185	2.85069e-07	4.73539e-05	AF394735	MAD2 mitotic arrest deficient-like 1 (yeast)	MAD2L1	4085	0.000557629
1554887_at	0.00564003	-0.000205428	-0.00107909	0.000567138	0.00771012	-0.00171002	0.000994958	0.000696617	-0.00227284	-0.000716682	0.000874066	-1.39831	-0.607897	-1.54283	2.15556	1.19245	6.22304	54.0532	1.55417e-06	0.000105308	BC032716	---	---		0.00107909
1554915_a_at	0.00586985	0.00305382	0.00199736	-0.00268362	0.00269123	0.00089204	-0.000272409	0.000340643	5.43045e-05	2.40519e-05	-0.000100506	-1.34488	0.131906	-1.37415	0.625014	1.80033	5.05414	67.051	5.99071e-07	6.63633e-05	BC034978	phosphodiesterase 12	PDE12	201626	-0.00199736
1555216_a_at	-0.00595186	0.000607105	0.00281517	0.00376011	-0.00218858	-0.00108573	0.000495711	-0.00240219	-0.00208391	0.000171925	6.13683e-05	1.13504	-1.22568	1.95822	-1.43767	-1.07352	5.92128	75.8602	3.45855e-07	5.14664e-05	BC009278	hypothetical protein LOC645722	LOC645722	645722	-0.00281517
1555461_at	0.0054338	0.00307479	0.00420721	-0.00313569	0.00411083	0.000138638	0.000365506	0.000236912	0.000780025	-1.01337e-05	0.000570009	-1.60781	-0.12833	-1.00964	0.461974	2.0157	6.27814	68.1998	5.55518e-07	6.42765e-05	BC015866	---	---		-0.00420721
1555517_at	0.00318478	0.00761236	0.0046313	-0.0044594	0.00240223	-0.00103097	-0.000434944	0.000856699	0.00187571	-0.00280364	-0.000727437	-0.600945	-0.77419	-0.6697	-0.753459	1.80778	4.32314	68.5448	5.43202e-07	6.35243e-05	BC045709	gamma-aminobutyric acid (GABA) A receptor, gamma 3	GABRG3	2567	-0.0046313
1555731_a_at	0.00333775	0.00753781	0.00466387	-0.00440173	0.0014831	-2.60632e-05	0.000773405	0.00131778	0.00120366	-0.00292413	-0.000805377	-0.803472	-0.812618	-0.808294	-0.952453	2.24818	4.26795	87.7972	1.80008e-07	3.53348e-05	AF393369	adaptor-related protein complex 1, sigma 3 subunit	AP1S3	130340	-0.00466387
1555845_at	0.00494511	-0.00628295	0.000509069	-0.00316424	-0.000248363	0.000678498	-0.000260937	0.00132868	-0.00236238	5.62505e-05	-0.000493711	-1.17485	1.7485	-0.482868	1.18807	0.121877	7.74306	56.2085	1.30808e-06	9.77691e-05	AI688573	---	---		-0.000509069
1555878_at	0.00599765	-0.00173423	-0.000109085	-0.00418615	-0.00168846	0.000730519	-0.00240436	0.00090945	-0.00118029	-0.00021774	-0.000393037	-2.02238	2.85065	-2.0611	1.51701	1.43489	6.99757	67.3024	5.89195e-07	6.58031e-05	AK094613	Ribosomal protein S24	RPS24	6229	0.000109085
1555882_at	0.00595906	0.0015648	-0.00260397	-0.00160225	0.0039818	-0.00117868	-0.000492736	0.00213197	0.000674034	-0.000290547	4.46517e-07	-1.00671	0.0314629	-1.95974	1.4408	1.34218	5.73594	134.41	2.6494e-08	1.38829e-05	AJ271379	spindlin family, member 3	SPIN3	169981	0.00260397
1555888_at	0.00518113	0.00198454	0.00146315	-0.0074691	0.00125141	0.00136313	-0.00425749	0.003333	0.000256777	0.00053873	-0.000436205	-1.07822	1.30641	-1.45762	0.14529	1.51764	5.67943	50.997	2.00779e-06	0.000118799	AK095151	Ubiquitin protein ligase E3 component n-recognin 5	UBR5	51366	-0.00146315
1555920_at	0.00593195	-0.00161285	-0.000569366	0.00178062	0.00518545	-0.00114867	0.0022083	-6.3774e-05	-0.000464478	-0.000271753	0.00105239	-1.28044	-0.111932	-0.991669	1.83217	0.757421	6.90064	52.3236	1.79341e-06	0.000111808	BU683892	Chromobox homolog 3 (HP1 gamma homolog, Drosophila)	CBX3	11335	0.000569366
1555963_x_at	0.00204121	-0.00871042	-0.00541857	0.0032173	0.000971589	0.000893309	-0.000831691	0.00134631	0.000703685	0.00147825	-0.00068479	-0.427256	1.4324	-0.453621	2.17787	-1.19971	5.4986	115.034	5.34779e-08	1.86967e-05	CA503291	UDP-GlcNAc:betaGal beta-1,3-N-acetylglucosaminyltransferase 7	B3GNT7	93010	0.00541857
1555971_s_at	0.00566036	-0.00272153	-0.00387522	-0.00306203	0.000973885	0.00270527	-0.000619482	0.00182332	-0.00179446	0.000222704	-0.000595482	-1.02051	1.71632	-1.76649	1.61111	0.551989	7.89161	58.2932	1.11376e-06	8.94789e-05	AU154086	F-box protein 28	FBXO28	23219	0.00387522
1556066_at	-0.00552939	0.00427867	-0.00295275	0.00278264	-0.00145077	0.000168614	-0.000176344	-0.0016867	-0.000480839	0.00028665	0.00134389	1.25102	-1.11085	0.357605	-0.960174	-0.479025	6.77069	58.7718	1.07424e-06	8.84875e-05	AI830331	lysine (K)-specific demethylase 6B	KDM6B	23135	0.00295275
1556194_a_at	0.00506538	0.00548028	0.00298244	-0.00237109	0.00244137	-0.00126678	0.00109087	0.0019886	-6.53743e-05	0.000424285	-0.000415889	-2.13608	-1.31746	-2.14767	0.234358	3.85078	5.53951	181.974	6.71797e-09	7.48752e-06	BC042959	hypothetical LOC100507455	LOC100507455	100507455	-0.00298244
1556328_at	0.00316015	0.00770927	0.0043112	-0.00480102	0.000374555	0.000347909	-2.00539e-05	0.00371007	0.00122922	-0.000144244	0.000366916	-0.910497	-0.765763	-1.12895	-1.38784	2.84361	4.57431	69.7713	5.02011e-07	6.06556e-05	BC042378	---	---		-0.0043112
1556329_a_at	0.00327472	0.00763437	0.00411324	-0.00483415	-0.00113592	0.0011096	0.000318752	0.00306154	0.00155584	-0.000124942	-0.000359545	-1.14161	-0.547938	-1.47633	-1.8688	3.55434	5.23597	52.9614	1.70029e-06	0.000110724	BC042378	---	---		-0.00411324
1556469_s_at	0.00312357	-0.00826543	-0.00395746	-0.0021458	-0.00177604	0.00296193	-0.00156241	0.00116682	-0.000319143	0.00104807	0.000949203	-0.996161	3.57607	-0.999502	2.17088	-0.976778	5.07035	159.771	1.21199e-08	9.30287e-06	AK091930	Hypothetical protein LOC100288099	LOC100288099	100288099	0.00395746
1556824_at	-0.00341085	0.00878499	-0.000921932	-0.00181768	-0.000904557	-0.000119907	0.0012381	1.21298e-05	0.00074757	0.000137995	-0.000344089	2.40401	-3.06718	-0.228404	-3.44994	1.07061	8.70946	82.0657	2.43471e-07	4.27416e-05	AF147445	---	---		0.000921932
1557014_a_at	0.00588394	0.00115845	0.000824785	-0.000247977	0.00567882	-0.00233321	0.000901773	0.00293928	-0.000684214	0.000485557	0.000482863	-1.48173	-0.508667	-1.30749	1.54002	1.49627	5.37004	160.536	1.18604e-08	9.30287e-06	BC041970	family with sequence similarity 201, member A	FAM201A	158228	-0.000824785
1557181_s_at	0.00342185	0.00706422	0.00491812	-0.00501288	0.0025392	-0.000557245	0.000310945	0.00191132	0.000299798	0.000517988	-0.000736933	-0.962064	-0.812211	-0.870243	-0.919704	2.4261	4.32442	119.723	4.46657e-08	1.76763e-05	AA633992	chromosome 11 open reading frame 87	C11orf87	399947	-0.00491812
1557238_s_at	0.00381955	-0.00805026	-0.00286697	-0.000628289	-6.14836e-05	0.00163654	-0.00188278	-0.000611605	-0.000401183	-0.000901934	0.00105986	-0.942661	2.13974	-0.663866	1.8171	-0.539404	4.66601	72.0871	4.34123e-07	5.76028e-05	BQ446762	---	---		0.00286697
1557369_a_at	0.00252589	-0.00901099	-0.00393377	-0.000967221	-0.000505853	0.0018393	-0.00215581	0.00179111	-0.00011313	-0.000544194	-0.000167443	-1.16069	4.10719	-0.921141	3.04591	-1.62488	6.26326	215.669	3.10482e-09	5.13828e-06	BC043407	hypothetical LOC285401	LOC285401	285401	0.00393377
1557805_at	0.00332226	-0.00808586	-0.00448107	0.00014954	0.000647297	0.00225939	-0.00166183	0.00081729	0.0026903	-0.00261885	-0.000869652	-0.598431	1.66225	-0.644863	1.63205	-0.613773	4.19046	52.9045	1.70836e-06	0.000110724	AF085969	---	---		0.00448107
1557961_s_at	0.00398107	0.00636863	0.00418933	-0.00549712	-0.000311801	0.000197504	-0.00189829	0.00331863	0.00129683	4.55142e-05	-0.000538739	-0.832745	0.0451967	-0.939551	-0.727991	1.92937	6.51357	65.2942	6.74014e-07	7.07883e-05	BG492376	hypothetical protein LOC100127983	LOC100127983	100127983	-0.00418933
1558002_at	0.00319146	-0.00727278	-0.00244222	0.00528806	0.00516197	-0.00223077	0.00254323	0.00231021	0.000469737	0.0010743	0.00032078	-0.915691	0.127908	-0.164709	2.41029	-0.623999	6.53532	92.8091	1.40367e-07	2.95979e-05	BQ944989	Serine/threonine kinase receptor associated protein	STRAP	11171	0.00244222
1558078_at	0.00564648	-0.00368953	-0.0022563	-0.0035814	-0.000311816	0.0012561	-0.00195897	0.00136003	-0.00207512	0.00177365	0.00131515	-0.896922	1.52714	-1.09023	1.10879	0.375502	5.91123	59.3101	1.0318e-06	8.63864e-05	BQ219651	---	---		0.0022563
1558522_at	0.00610259	0.00172637	0.000324386	-0.00251883	0.00276781	0.000755121	-0.000679629	0.00265982	-0.000913564	-0.000151527	-0.000567694	-1.52889	0.484233	-1.83122	1.18588	1.79771	5.43084	122.527	4.0238e-08	1.69126e-05	BC013077	---	---		-0.000324386
1559258_a_at	-0.000464971	-0.00586001	0.00103829	-0.00847397	-0.00843023	0.00589458	-0.00443349	-0.00055961	-0.00067102	-0.000176845	0.000271338	-0.24713	3.62731	0.164438	-0.678577	-0.619215	3.92916	109.117	6.78329e-08	2.0334e-05	AK026566	chromosome X open reading frame 61	CXorf61	203413	-0.00103829
1559391_s_at	0.00270269	-0.00920698	0.0014736	0.00249763	-0.0004205	0.00253127	-0.00114426	-0.000142633	-0.00190293	0.000321001	0.000818842	-1.53806	2.3526	0.495286	2.11126	-0.983839	6.01356	49.5398	2.28039e-06	0.0001263	AI084451	---	---		-0.0014736
1559410_at	0.00196645	-0.00935537	-0.00179388	0.000519921	-0.00395999	0.00371032	-0.000252265	0.00202594	-0.00178302	0.000510434	-0.000130958	-1.15338	3.79145	0.0752127	2.13257	-1.58229	5.46662	60.0088	9.79706e-07	8.47896e-05	AA524609	---	---		0.00179388
1559470_at	0.00194482	-0.00586208	-0.00581041	0.00669519	0.00679927	-0.00373525	0.00329262	0.00171786	0.000145826	-0.00099454	0.000576081	-0.272417	-0.678644	-0.389112	2.34689	-0.806555	4.37913	55.7471	1.35652e-06	9.93272e-05	AY063451	D21S2088E	D21S2088E	266917	0.00581041
1559503_a_at	0.000960256	-0.00641758	-0.00096101	-0.00792419	-0.00766905	0.00627344	-0.00362858	-0.00071876	0.000596447	-0.00207506	-9.02545e-05	-0.337946	3.26614	-0.266101	-0.111385	-0.499108	3.46553	73.6437	3.94722e-07	5.58321e-05	AA350425	zinc finger protein 91 pseudogene	LOC441666	441666	0.00096101
1560099_at	0.000991428	-0.00468911	0.00108059	-0.00945268	-0.00870539	0.00604622	-0.00399828	0.00185284	0.000131554	0.00153305	-0.000433923	-0.352234	2.64395	-0.155879	-0.437637	-0.133406	3.40689	50.5284	2.09089e-06	0.000120708	BC041488	Hypothetical protein LOC339260	LOC339260	339260	-0.00108059
1560133_at	0.00350861	-0.00826327	-0.00360404	0.00100265	0.000383638	0.000895629	-0.00188258	-0.000600455	-0.0003766	-0.000796155	-0.00112186	-0.72611	1.61775	-0.544183	1.75451	-0.620022	4.04871	60.5741	9.39898e-07	8.29251e-05	BC012484	GRB10 interacting GYF protein 2	GIGYF2	26058	0.00360404
1560250_s_at	0.00397865	-0.00688337	-0.00497809	-0.00100501	0.00285655	0.00120023	-0.0015803	0.00169839	-0.00258375	-0.000660347	-5.17863e-05	-0.682878	1.50935	-1.0078	1.83956	-0.374749	4.81479	53.678	1.6026e-06	0.000106655	BC035844	hypothetical protein LOC284242	LOC284242	284242	0.00497809
1560562_a_at	0.000251049	-0.00950967	-0.0046118	0.00250408	-0.00234266	0.000877765	-0.00237882	0.000796396	0.000882336	0.0033624	0.000721419	-0.122188	1.68044	0.022466	1.38889	-1.37886	5.97959	50.078	2.17475e-06	0.00012295	AK026366	zinc finger protein 677	ZNF677	342926	0.0046118
1561195_at	0.0017553	-0.00901199	-0.00566572	-3.59645e-05	0.00102203	0.000519295	-0.00176508	0.00185782	-0.000586472	0.000461296	0.00122426	-0.342753	1.80804	-0.546842	1.80947	-1.10168	5.38121	55.0658	1.43211e-06	0.000102315	AL832142	---	---		0.00566572
1561341_at	0.000929205	-0.00912661	-0.00271159	-0.00437646	-0.00287587	0.00439769	-0.00353497	0.000522685	0.000673289	-0.0011047	-0.000307785	-0.436899	3.26519	-0.238996	0.930964	-1.11281	5.69781	56.4189	1.28669e-06	9.73268e-05	BC035108	---	---		0.00271159
1562169_at	0.00331234	-0.00785	-0.00420781	0.00298354	0.00322878	0.00091495	-0.000376997	0.00155265	-0.00191404	-0.000134163	-0.000287199	-0.863286	1.26501	-0.676051	2.60836	-0.846588	4.53156	116.387	5.07345e-08	1.84718e-05	AL109688	---	---		0.00420781
1562235_s_at	-0.000132376	-0.0100757	0.000741418	0.000977304	-0.00337705	0.00364026	0.00122269	0.000864957	0.000952948	0.000980597	0.000355246	-0.818102	2.84813	1.15555	1.26336	-1.74388	5.35794	98.9849	1.05128e-07	2.52923e-05	AL832146	---	---		-0.000741418
1562245_a_at	0.00180579	-0.00829789	-0.00347318	-0.00494315	-0.00432634	0.00377498	-0.00349854	-0.000604162	-0.00188501	0.000894174	-0.000977001	-0.435498	3.12079	-0.540598	0.857744	-0.816196	4.08515	74.3928	3.77318e-07	5.4685e-05	AL833487	Zinc finger protein 578	ZNF578	147660	0.00347318
1562289_at	0.00236068	-0.00892913	-0.00353365	-0.00164156	-0.00223624	0.00310531	-0.00280892	0.001814	0.00104726	0.000760241	0.000831372	-0.636187	2.68856	-0.486619	1.48307	-0.924299	6.28032	114.467	5.46814e-08	1.87818e-05	AL834519	---	---		0.00353365
1562309_s_at	0.00173036	-0.00917959	-0.00348928	-0.00187647	-0.0024872	0.00415255	-0.00260785	0.00108099	-0.00145943	0.00106951	0.00118309	-0.553485	2.95454	-0.373439	1.41561	-1.12614	4.68942	106.722	7.49561e-08	2.14139e-05	AK092243	PHD finger protein 21B	PHF21B	112885	0.00348928
1562484_at	0.00334936	-0.00746154	-0.00479346	0.00364453	0.00331889	0.000708802	-0.000249838	0.00157074	-0.00131471	-0.000866628	-0.000285947	-1.13092	1.52762	-1.11046	3.86436	-1.21422	4.60408	201.366	4.2415e-09	5.93951e-06	BC041481	chromosome 17 open reading frame 104	C17orf104	284071	0.00479346
1562527_at	0.00258633	-0.00821636	-0.0040597	-0.00303243	-0.00264316	0.00406423	-0.00369525	0.000286234	-0.0010593	-0.000785046	0.000854583	-0.538436	2.79432	-0.71255	1.25806	-0.756676	4.10546	101.425	9.42339e-08	2.37161e-05	AF519622	hypothetical protein LOC283027	LOC283027	283027	0.0040597
1562529_s_at	-0.000266895	-0.0070658	-0.00849865	-0.00132379	-0.00461534	0.0034142	-0.00376199	0.000612584	0.000958656	-0.0017317	0.000587793	0.388921	1.80378	-0.595134	0.708325	-1.06564	5.68993	51.1373	1.98369e-06	0.000118618	BC040965	---	---		0.00849865
1562828_at	0.00117797	-0.0102836	-0.00032181	-0.000590367	-0.000266069	0.00200331	-0.000195494	0.00145061	-0.000168074	-0.000890868	0.000231399	-1.27802	3.45039	0.610307	2.18882	-1.73819	5.53941	71.1601	4.59869e-07	5.76028e-05	BC037816	---	---		0.00032181
1563357_at	-0.00132755	-0.00812499	-0.00211133	-0.00403675	-0.00635379	0.00658944	-0.00200408	0.000802779	-0.00109685	0.00208353	-0.000323668	0.041715	3.07282	0.284597	0.101509	-1.32339	4.37911	51.0572	1.99739e-06	0.000118645	AL049245	---	---		0.00211133
1563881_at	0.001658	-0.00853548	-0.00041727	-0.00549022	-0.00465401	0.00413961	-0.00338584	0.000681638	0.00248035	-0.00138538	-0.000684752	-0.598216	2.73718	-0.0923193	0.507647	-0.591063	3.76182	57.1208	1.21834e-06	9.48604e-05	AL831897	---	---		0.00041727
1564154_at	0.00119525	-0.00917364	-0.00537188	0.00184093	0.00220365	0.000948224	-0.0017508	0.00235448	-6.6384e-06	0.000235685	3.65072e-05	-0.364406	1.8904	-0.431515	2.48966	-1.63783	6.59976	65.323	6.72696e-07	7.07883e-05	BC041466	---	---		0.00537188
1564359_a_at	0.00076172	-0.00475902	0.000640608	-0.00972689	-0.00804238	0.00640885	-0.00457167	0.00106889	0.000847181	0.00291827	0.000154191	-0.337655	3.14406	-0.229992	-0.52603	-0.206349	3.71931	61.7429	8.63647e-07	7.90398e-05	AK057473	Hypothetical protein LOC339260	LOC339260	339260	-0.000640608
1564383_s_at	0.00147226	-0.00939167	-0.00363114	0.00330755	0.00280349	0.00137936	0.000746715	0.000737138	-0.000162876	0.00221626	0.00110768	-0.608198	1.35596	-0.00784414	2.33717	-1.39667	5.85539	62.9401	7.93209e-07	7.66717e-05	AK093253	FLJ35934	FLJ35934	400579	0.00363114
1564413_at	0.00136448	-0.00985334	-0.00239539	-0.00152613	-0.0017167	0.00248049	-0.00173259	0.00183534	-0.0012022	-0.00142441	-0.000531292	-0.850772	3.53246	-0.042538	1.89195	-1.55966	6.8777	102.443	9.00971e-08	2.31751e-05	AK093435	hypothetical locus LOC388666	FLJ36116	388666	0.00239539
1564964_at	0.00271473	-0.0086118	-0.00498869	-0.000482065	0.00109254	0.000530865	-0.00142324	0.00170264	0.000874952	0.00122274	-0.000850694	-0.484353	1.58157	-0.570702	1.58968	-0.722159	4.21167	51.2563	1.96353e-06	0.000118099	AL137427	---	---		0.00498869
1565716_at	0.00143688	-0.00619039	-0.00887935	0.00530699	0.00361533	-0.00085847	-0.000199181	0.000962758	0.00150721	-0.000941182	-0.00152862	0.122821	0.13567	-0.640974	1.64376	-0.836567	5.3789	59.06	1.05125e-06	8.74286e-05	BE930017	fused in sarcoma	FUS	2521	0.00887935
1566084_at	0.0046623	-0.00590314	-0.0043029	-0.000895123	0.00199199	0.00275025	-0.00192971	0.00122575	-0.00300035	-9.75048e-05	0.000534066	-1.07027	2.12	-1.50287	2.34561	-0.198228	5.58895	76.234	3.38355e-07	5.09812e-05	AK090649	---	---		0.0043029
1566603_s_at	0.00526747	0.00352651	-0.000121926	0.00142024	0.00763569	-0.000821078	0.000822331	0.000202348	-0.00100061	0.00185413	0.000107387	-1.10279	-1.57077	-1.56887	1.42959	1.71923	5.1653	49.5974	2.26877e-06	0.000125791	AK094587	RNA pseudouridylate synthase domain containing 3	RPUSD3	285367	0.000121926
1568646_x_at	0.00293589	-0.00523612	-0.0046438	0.00741961	0.00675345	-0.0030891	0.000828534	0.0022263	-0.000924952	0.00262346	-0.000310371	-0.685279	-0.917002	-0.698801	3.31464	-0.752943	4.23046	122.27	4.06202e-08	1.69343e-05	BC038199	zinc finger protein 208	ZNF208	7757	0.0046438
1568780_at	0.00420642	-0.00723518	-0.00189217	-0.00227089	0.000620146	0.00339843	-6.33167e-05	0.0038509	0.000183889	-0.000522172	0.000738619	-1.85896	3.63172	-1.15784	2.73911	-0.405792	6.72295	64.2086	7.26053e-07	7.27558e-05	BC030211	---	---		0.00189217
1569023_a_at	0.00120189	-0.00722663	-0.00167618	-0.00776588	-0.00543185	0.00587161	-0.00389382	0.000843225	-0.000203803	-0.000395508	-1.12282e-05	-0.682954	5.63357	-0.646525	0.346183	-0.994674	4.62727	100.568	9.78954e-08	2.44126e-05	BC020935	---	---		0.00167618
1569040_s_at	0.00311508	-0.00551815	-0.00479416	0.00663922	0.00697607	-0.00139214	0.000755212	0.00101263	-0.00172333	-0.00257155	0.000829332	-0.442769	-0.348594	-0.494509	2.02385	-0.460595	3.75485	52.8476	1.71647e-06	0.000110806	AA632139	ankyrin repeat domain 36B pseudogene 2	ANKRD36BP2	645784	0.00479416
1569191_at	0.00284345	-0.00836487	-0.00475739	0.000824815	0.000374013	0.00352598	-0.00184214	-0.000255687	-0.00224696	0.000338856	0.000858441	-0.706738	2.41267	-0.818	2.29592	-1.08277	4.4976	66.5915	6.17647e-07	6.74631e-05	BC016785	zinc finger protein 826, pseudogene	ZNF826P	664701	0.00475739
1569484_s_at	0.00436215	-0.00740023	-0.000818419	-0.000415998	0.000773588	0.00315355	-0.0020436	0.00071846	0.00145444	0.000598562	0.000126657	-1.59289	2.67733	-0.720286	2.28626	-0.343538	5.39671	67.0643	5.98542e-07	6.63633e-05	AL603301	MDN1, midasin homolog (yeast)	MDN1	23195	0.000818419
1570107_at	-0.0036244	0.00811509	-0.00339058	0.00024791	-0.00207275	0.000432727	0.000887357	-0.00197021	-0.00117212	0.00123547	-0.000662595	3.36917	-3.51921	-0.622126	-3.4118	0.493181	8.26671	54.003	1.56055e-06	0.000105478	BC029332	---	---		0.00339058
1570153_at	0.00297911	0.0026539	0.00289795	-0.011213	-0.00506684	0.00332255	-0.0035657	0.00202081	0.00180784	-0.000350766	0.000351909	-0.852877	2.84474	-1.20232	-1.45701	1.67752	5.13295	109.684	6.62702e-08	2.03327e-05	BC013944	chromosome 13 open reading frame 38	C13orf38	728591	-0.00289795
1570382_at	-0.00463426	0.00497533	-0.00620796	-0.000332308	-0.00172725	0.00229571	-0.00162992	-0.00230573	-0.00079985	0.000709284	0.000545374	1.70315	-0.772479	-0.354607	-1.16359	-0.433525	7.05149	64.5306	7.10124e-07	7.25258e-05	BC037257	---	---		0.00620796
200650_s_at	-0.00276121	0.00791062	-0.000832854	-0.00680991	-0.00278236	0.00167151	-0.00109488	-0.00354174	0.000208244	0.000303145	0.000383706	1.1176	-0.305912	-0.442282	-2.09102	0.673235	12.8038	56.5382	1.27474e-06	9.67227e-05	NM_005566	lactate dehydrogenase A	LDHA	3939	0.000832854
200690_at	0.00598589	-0.00111627	0.00155385	-0.00250684	0.00396025	-0.00233539	0.00102091	0.00205324	-0.000540448	-0.000598251	0.000608266	-1.46126	0.473544	-0.938042	1.27837	1.07652	7.77311	59.5776	1.01146e-06	8.57749e-05	AA927701	heat shock 70kDa protein 9 (mortalin)	HSPA9	3313	-0.00155385
200790_at	0.00438324	0.00229237	0.00838016	-0.00435895	0.00165118	0.00125987	0.00104462	0.000355145	0.000301314	0.000120203	0.00149107	-2.04023	0.493076	-0.0300586	-0.316049	2.10661	10.3063	73.3235	4.02461e-07	5.58321e-05	NM_002539	ornithine decarboxylase 1	ODC1	4953	-0.00838016
200806_s_at	0.00603748	0.00199069	-0.00204875	-0.000168923	0.00306897	-0.00085284	-0.00280199	0.0011837	0.00051323	-0.00102558	-0.00014952	-1.57589	-0.0557541	-3.03116	2.17086	2.168	10.4222	59.3747	1.02684e-06	8.63864e-05	BE256479	heat shock 60kDa protein 1 (chaperonin)	HSPD1	3329	0.00204875
200812_at	0.00620285	0.00104926	-0.000725852	-0.00333332	0.000741465	0.000862394	-0.000117046	0.00119244	0.000338049	-0.000447682	-0.000926293	-1.07078	0.791088	-1.45784	0.862188	1.20418	10.8084	52.4042	1.78129e-06	0.000111205	NM_006429	chaperonin containing TCP1, subunit 7 (eta)	CCT7	10574	0.000725852
200843_s_at	0.00590104	-0.00204984	-0.00272161	-0.00213373	0.00361446	-0.00154949	-0.000907645	0.001015	-0.000133867	0.00135461	0.000588183	-0.993733	0.740253	-1.40388	1.53154	0.661873	9.84291	61.8463	8.57269e-07	7.8947e-05	NM_004446	glutamyl-prolyl-tRNA synthetase	EPRS	2058	0.00272161
200894_s_at	0.00598319	-0.000293736	-0.00358469	0.001183	0.00363275	-0.00120475	0.000963569	0.000120269	0.000287714	-0.0010422	-3.62493e-06	-1.36152	-0.0458811	-2.35571	2.63691	1.18935	7.75609	50.5704	2.08327e-06	0.000120651	AA894574	FK506 binding protein 4, 59kDa	FKBP4	2288	0.00358469
200900_s_at	0.00568082	-0.00140484	-0.00390156	0.00255198	0.00388644	-0.00257416	-0.00127674	0.00200272	0.00180227	0.00221165	5.06735e-05	-1.03363	-0.0697087	-1.7586	2.3647	0.652798	8.07958	50.5286	2.09085e-06	0.000120708	AI583537	mannose-6-phosphate receptor (cation dependent)	M6PR	4074	0.00390156
200910_at	0.00617149	5.44367e-05	0.00260094	-0.00199095	0.00152957	0.00162488	0.000157441	0.00170063	0.000245508	-0.000424628	-0.00224664	-1.54543	0.772365	-0.963125	0.95662	1.29231	11.0828	58.6722	1.08232e-06	8.88706e-05	NM_005998	chaperonin containing TCP1, subunit 3 (gamma)	CCT3	7203	-0.00260094
200979_at	0.00613065	0.000255073	0.0020149	-0.000349282	0.00394749	-0.000273601	-0.000684134	0.00221217	-0.000105645	-0.000375521	0.000187434	-1.68022	0.168701	-1.15228	1.43369	1.43638	7.46251	96.4369	1.18185e-07	2.71195e-05	BF739979	pyruvate dehydrogenase (lipoamide) alpha 1	PDHA1	5160	-0.0020149
200993_at	0.0058835	0.00132167	-0.00356829	-0.0034815	0.00173839	0.000638044	-0.00128032	0.00181415	-0.00122036	0.000798446	-0.000521042	-0.94619	0.887355	-2.3847	1.29151	1.3792	9.98863	102.545	8.96968e-08	2.31751e-05	AA939270	importin 7	IPO7	10527	0.00356829
200994_at	0.00627728	-0.00117712	0.000713674	-0.00188318	0.000498601	-0.000451148	-0.000283197	0.00227743	-0.00165666	-0.000165559	0.000466078	-1.44246	0.997961	-1.13201	1.24532	1.03427	10.6128	58.1288	1.12775e-06	8.94789e-05	BG291787	importin 7	IPO7	10527	-0.000713674
201018_at	0.00627784	-0.00129552	-8.723e-05	-0.000708128	0.00223116	8.22821e-06	-0.00165519	-0.000264335	-0.00151804	0.000443164	0.00183324	-1.51028	0.863843	-1.41048	1.64612	1.06523	8.94198	49.2463	2.34062e-06	0.000127626	AL079283	eukaryotic translation initiation factor 1A, X-linked	EIF1AX	1964	8.723e-05
201112_s_at	0.00630182	-0.000806203	-0.000375405	-0.00210389	0.00136873	0.000977412	0.000545873	0.00054381	0.000205358	0.000140708	-0.00079928	-1.46802	1.04662	-1.4784	1.42212	1.15666	10.3806	53.6573	1.60533e-06	0.000106655	NM_001316	CSE1 chromosome segregation 1-like (yeast)	CSE1L	1434	0.000375405
201113_at	0.00616996	0.00230487	0.000501938	-0.00152309	0.00205723	-0.000179648	0.000428162	0.000894672	-0.000287515	-0.000291833	-0.000386597	-1.14959	0.101077	-1.3235	0.874182	1.41544	10.1645	50.8545	2.03261e-06	0.00011938	NM_003321	Tu translation elongation factor, mitochondrial	TUFM	7284	-0.000501938
201261_x_at	-0.00599185	0.0015361	-0.00118073	0.003703	-0.00260834	0.00189636	0.000473352	-0.00187559	-0.00095679	0.00161881	-0.00020166	2.29536	-1.53138	1.68856	-1.88373	-1.65479	7.03863	70.1311	4.90658e-07	5.99078e-05	BC002416	biglycan	BGN	633	0.00118073
201324_at	-0.00322569	0.00865204	0.00110677	-0.00230206	-0.00336188	0.00104878	0.000186997	-0.00170308	0.000602185	-0.000110744	0.000653035	2.18038	-2.32751	0.193545	-4.2812	1.32056	8.41625	107.39	7.28831e-08	2.11721e-05	NM_001423	epithelial membrane protein 1	EMP1	2012	-0.00110677
201438_at	-0.00569249	-0.00217438	-0.00382582	0.00146795	-0.00386652	0.00145994	0.000228124	-0.00360453	0.000287475	-0.000435446	8.90935e-05	3.96864	0.550495	2.24741	-2.04126	-4.28957	9.08593	242.341	1.82645e-09	4.63466e-06	NM_004369	collagen, type VI, alpha 3	COL6A3	1293	0.00382582
201506_at	-0.00339477	0.00870718	-1.49319e-05	-0.00024718	-0.000135293	-0.00131739	0.00143833	-0.00412587	0.000720736	0.000628154	-0.000739381	2.07186	-3.41799	0.147807	-2.96562	0.946012	10.9767	115.067	5.34089e-08	1.86967e-05	NM_000358	transforming growth factor, beta-induced, 68kDa	TGFBI	7045	1.49319e-05
201508_at	-0.00543954	-0.00011213	-0.00436563	0.00202379	-0.0054605	0.00333137	-0.00143258	-0.00314577	0.00194049	-0.000653132	1.43869e-05	2.22489	0.180016	0.720777	-1.40088	-1.83149	7.8988	49.4438	2.29987e-06	0.000126615	NM_001552	insulin-like growth factor binding protein 4	IGFBP4	3487	0.00436563
201551_s_at	0.004561	0.00698364	0.000620299	-0.00180953	0.00225887	-0.000700659	-0.00272115	0.0018429	-0.000216104	0.000160401	-0.00107971	-0.629993	-0.921817	-1.6884	-0.0324494	2.0845	6.02081	49.6866	2.25097e-06	0.000124931	J03263	lysosomal-associated membrane protein 1	LAMP1	3916	-0.000620299
201761_at	0.00618637	-0.000323803	-0.00160344	-0.00321665	0.0016747	0.000729191	-0.000110809	0.000610827	-0.000771298	0.000381486	-0.00177142	-1.44687	1.24464	-2.00829	1.53681	1.34631	10.6725	79.1254	2.8657e-07	4.73539e-05	NM_006636	methylenetetrahydrofolate dehydrogenase (NADP+ dependent) 2, methenyltetrahydrofolate cyclohydrolase	MTHFD2	10797	0.00160344
201797_s_at	0.00548336	0.00272801	0.00103181	-0.00612442	0.00235707	-0.000902733	-0.0012222	0.00318893	0.000509609	0.000139604	-0.00121112	-1.16902	0.639512	-1.55399	0.400136	1.72509	7.96801	70.1056	4.91452e-07	5.99078e-05	NM_006295	valyl-tRNA synthetase	VARS	7407	-0.00103181
201871_s_at	-0.00170814	0.00648962	0.00398368	-0.00761019	-0.00725344	0.00172528	-0.00296219	-0.00295897	-0.00107616	0.000856353	-0.000577125	0.522113	0.767793	0.0706933	-2.81308	1.05022	8.6707	64.5234	7.10477e-07	7.25258e-05	NM_015853	UBX domain protein 1	UBXN1	51035	-0.00398368
201897_s_at	0.00582492	-0.00341361	-0.00244601	0.00119893	0.00247398	-0.00186486	0.000561316	1.67479e-05	-0.000788755	-0.000209822	-0.000556491	-1.56806	0.832791	-1.55715	2.6686	0.549491	10.198	50.1091	2.16883e-06	0.000122867	NM_001826	CDC28 protein kinase regulatory subunit 1B	CKS1B	1163	0.00244601
201909_at	-0.00122141	0.00718391	0.00174747	-0.00829293	-0.00693204	0.0020122	-0.00288531	-0.00192303	3.14155e-05	0.000145603	-0.000727127	1.51257	1.70994	-1.07068	-5.83475	2.52106	10.5364	134.467	2.64431e-08	1.38829e-05	NM_001008	ribosomal protein S4, Y-linked 1	RPS4Y1	6192	-0.00174747
202144_s_at	0.00582679	-0.000523863	0.00435566	-0.0034315	0.00129429	0.00175978	-0.000729834	0.00122157	0.000183852	-0.000664427	0.00112871	-1.25652	0.837965	-0.522786	0.528885	0.973128	10.2259	54.5587	1.49172e-06	0.000104445	NM_000026	adenylosuccinate lyase	ADSL	158	-0.00435566
202191_s_at	-0.00394604	-0.00750108	-3.67784e-05	0.00295858	-0.00429537	0.00196642	0.000637375	0.000677202	0.00202511	-0.00178377	0.000832664	0.320669	1.04388	1.29625	0.103066	-1.60151	6.66241	65.0042	6.87457e-07	7.11062e-05	BE439987	growth arrest-specific 7	GAS7	8522	3.67784e-05
202351_at	0.00272323	0.00869466	-0.00328987	-0.00381918	0.00112614	0.000164503	-0.00224476	0.00152712	-0.00136486	-0.00034443	0.00301038	0.235965	-0.637064	-1.43268	-0.430431	1.21846	10.491	50.6287	2.07276e-06	0.000120651	AI093579	integrin, alpha V (vitronectin receptor, alpha polypeptide, antigen CD51)	ITGAV	3685	0.00328987
202403_s_at	-0.00520838	0.00427881	0.00108145	-0.00246391	-0.00533851	0.00313127	-0.000155362	-0.00330154	0.00124668	0.000622047	-3.3131e-05	2.53331	-0.329125	1.52473	-4.35204	-0.538718	11.2965	139.398	2.24713e-08	1.29597e-05	AA788711	collagen, type I, alpha 2	COL1A2	1278	-0.00108145
202596_at	0.00559988	-0.0019936	0.0040167	-0.0050165	-0.000994718	0.00073835	-0.000201438	0.00140831	-0.000836185	0.000154648	0.00011707	-1.09802	1.14649	-0.40149	0.421009	0.702839	9.54757	51.3831	1.94232e-06	0.000117708	BC000436	endosulfine alpha	ENSA	2029	-0.0040167
202613_at	0.00570111	-0.00105795	0.00459724	0.000192912	0.00414822	0.000691115	0.00189318	0.00270986	-0.000946082	0.000981703	0.00157431	-2.65458	0.281853	-0.561421	1.8477	1.70311	8.26604	86.1715	1.95716e-07	3.71133e-05	NM_001905	CTP synthase	CTPS	1503	-0.00459724
202686_s_at	-0.00405471	-0.00414972	-0.0081702	0.00168507	-0.00375515	5.75491e-05	-0.00193217	0.000106282	0.000738101	-0.00281364	-0.00160174	1.8709	0.954177	-0.0186974	0.238727	-2.33564	8.15484	50.5965	2.07856e-06	0.000120651	NM_021913	AXL receptor tyrosine kinase	AXL	558	0.0081702
202712_s_at	0.0015227	-0.00971595	-0.00332358	0.000111745	0.00015478	0.00223291	-0.000903361	0.00300579	-0.00145126	-0.00180907	0.000325752	-0.738099	2.64586	-0.150297	2.14519	-1.47379	5.95383	66.3988	6.25647e-07	6.79293e-05	NM_020990	creatine kinase, mitochondrial 1A	CKMT1A	1159	0.00332358
202737_s_at	0.00598094	-0.00167209	0.00362911	-0.00177872	0.00200728	0.0012092	-0.000218425	0.000732473	-0.000796105	-1.77526e-05	-0.00116659	-1.90498	1.09369	-0.734138	1.23671	1.20537	9.67108	73.8504	3.89826e-07	5.54416e-05	NM_012321	LSM4 homolog, U6 small nuclear RNA associated (S. cerevisiae)	LSM4	25804	-0.00362911
202743_at	0.0054107	0.00345405	0.00358232	-0.00192279	0.00409386	-0.000186523	0.00318188	0.00290851	0.000127544	-0.000172271	-0.000101202	-1.84763	-0.679644	-1.13937	0.732888	2.34516	7.57543	71.4616	4.51297e-07	5.76028e-05	BE622627	phosphoinositide-3-kinase, regulatory subunit 3 (gamma)	PIK3R3	8503	-0.00358232
202752_x_at	-0.00102965	-0.0082029	-0.0057991	0.000299292	-0.00467825	0.00439556	-0.00484089	0.000816212	-0.00011766	-0.000260924	-0.000116693	0.310808	2.06565	-0.139325	0.723742	-1.38897	7.93216	50.0614	2.17791e-06	0.000123001	NM_012244	solute carrier family 7 (amino acid transporter, L-type), member 8	SLC7A8	23428	0.0057991
202780_at	0.00432182	0.00539741	0.00631306	-0.00309992	0.0010331	0.000117198	-0.00072101	0.00308772	0.000926983	0.00134002	0.000633851	-1.77625	-0.443266	-0.760702	-0.62976	2.85098	8.15899	72.2292	4.30333e-07	5.74039e-05	NM_000436	3-oxoacid CoA transferase 1	OXCT1	5019	-0.00631306
202886_s_at	0.00517814	0.00483756	0.00170815	-0.00503112	0.000558277	-0.00092531	-0.00147543	0.00230949	-0.000632315	0.000673338	0.000800236	-0.729823	0.166113	-1.07711	-0.0219559	1.40717	6.24981	62.082	8.42948e-07	7.81055e-05	M65254	protein phosphatase 2, regulatory subunit A, beta	PPP2R1B	5519	-0.00170815
202919_at	0.00558132	-0.00346357	-0.00435779	-7.11162e-05	0.00263251	0.000257725	8.27747e-05	0.0017639	-0.000272945	0.000723764	-0.000665538	-0.720276	0.717162	-1.12317	1.49645	0.232365	9.14818	55.9707	1.33278e-06	9.8494e-05	NM_015387	MOB1, Mps One Binder kinase activator-like 3 (yeast)	MOBKL3	25843	0.00435779
202922_at	0.00603659	-0.0017076	-0.00124551	-0.00351669	-0.000385106	0.000423342	-0.00285997	0.00189359	-0.00201875	-0.00013511	0.00135851	-1.01559	1.3489	-1.25755	1.00749	0.73267	7.74836	56.0562	1.32383e-06	9.83651e-05	BF676980	glutamate-cysteine ligase, catalytic subunit	GCLC	2729	0.00124551
202936_s_at	-0.00435164	-0.00503701	-0.00673491	0.00219951	-0.00177973	0.000574993	-0.000453105	-0.00381429	-0.00108844	0.00140455	-0.00130614	1.10556	0.457761	0.301399	0.222358	-1.60732	6.14614	51.1896	1.9748e-06	0.000118256	NM_000346	SRY (sex determining region Y)-box 9	SOX9	6662	0.00673491
202954_at	0.0058054	-0.00363373	-0.000176169	0.000290023	0.00418261	-0.000433009	-0.000877824	-7.74176e-05	-0.000306452	0.000206119	-0.000566881	-1.95414	1.04425	-1.326	2.6015	0.755719	9.93671	73.8696	3.89374e-07	5.54416e-05	NM_007019	ubiquitin-conjugating enzyme E2C	UBE2C	11065	0.000176169
202998_s_at	-0.00357745	-0.00609225	-0.00734601	0.00315202	-0.00156397	-0.000793208	-0.000513413	-0.00142111	0.000532119	0.000363072	-0.00134932	1.86766	0.961146	0.406808	1.21065	-3.26635	8.2225	96.5017	1.17829e-07	2.71195e-05	NM_002318	lysyl oxidase-like 2	LOXL2	4017	0.00734601
203066_at	-0.00300374	-0.00848345	-0.00270035	0.00297789	-0.00169783	0.00392409	-0.000445752	-0.0014641	0.000189901	-0.00131207	0.00129447	0.374805	1.30533	0.862756	0.658634	-1.82417	6.61645	52.5996	1.75236e-06	0.000111079	NM_014863	carbohydrate (N-acetylgalactosamine 4-sulfate 6-O) sulfotransferase 15	CHST15	51363	0.00270035
203148_s_at	0.00614313	0.000707728	0.00339078	-0.00137761	0.000796642	0.000540546	0.000435931	0.00133549	0.0004447	0.000344998	-0.000684748	-2.40722	0.838449	-1.28088	1.28113	2.12757	7.3229	56.7338	1.25546e-06	9.60285e-05	NM_014788	tripartite motif-containing 14	TRIM14	9830	-0.00339078
203162_s_at	0.00474696	0.00268159	0.00653582	-0.00578824	-0.000234293	-0.00142238	-0.000231972	0.00167693	0.000952756	0.00092379	0.000974932	-1.19276	0.527818	-0.362253	-0.213534	1.40068	8.53947	58.4128	1.10372e-06	8.9302e-05	NM_005886	katanin p80 (WD repeat containing) subunit B 1	KATNB1	10300	-0.00653582
203207_s_at	0.00620451	0.00034763	-0.00152444	-0.0020253	0.00287216	-0.000861807	-0.000796792	-0.000776799	-0.000863405	-0.000807918	0.00102844	-1.37851	0.607247	-1.98952	1.62359	1.42005	7.00461	61.0014	9.11103e-07	8.14371e-05	BF214329	mitochondrial fission regulator 1	MTFR1	9650	0.00152444
203276_at	0.00565283	9.58432e-05	0.00528561	-0.00365532	0.00113313	0.00110117	0.00105258	-0.0011968	-0.000378573	0.000104816	4.93319e-05	-2.76755	1.47278	-0.846897	0.831656	2.28678	7.76358	55.0563	1.43319e-06	0.000102315	NM_005573	lamin B1	LMNB1	4001	-0.00528561
203296_s_at	0.00223993	-0.00936028	-0.00101084	0.00392906	0.00167541	0.000453069	0.00167661	0.00189334	-6.19783e-05	-0.000634236	0.00039752	-1.84658	2.27442	0.554424	3.96274	-1.92301	5.58404	350.118	3.41158e-10	2.07018e-06	NM_000702	ATPase, Na+/K+ transporting, alpha 2 polypeptide	ATP1A2	477	0.00101084
203297_s_at	0.000684499	-0.00958877	-0.00223708	-0.00294134	-0.00335287	0.00429949	-0.00203137	-0.000589	-6.13352e-05	0.000863516	-0.000530072	-0.458042	3.05064	0.0304305	0.981063	-1.23317	9.4974	77.6888	3.10992e-07	4.89291e-05	BG029530	jumonji, AT rich interactive domain 2	JARID2	3720	0.00223708
203298_s_at	0.00202165	-0.00862655	-0.00415622	-0.00343005	-0.00234517	0.00402887	-0.00310847	-0.00104404	-0.000430427	0.000928869	0.00153949	-0.537397	3.41077	-0.724659	1.44252	-1.0781	9.33331	81.0917	2.56814e-07	4.43841e-05	NM_004973	jumonji, AT rich interactive domain 2	JARID2	3720	0.00415622
203313_s_at	0.00247232	-0.00588088	-0.00962652	0.00119191	0.000390378	-0.00064274	-0.00246541	-0.00133684	-0.0005617	-0.000583845	-0.00192444	0.126761	1.39512	-1.58503	2.16557	-0.978826	8.88804	52.5385	1.76135e-06	0.000111205	NM_003244	TGFB-induced factor homeobox 1	TGIF1	7050	0.00962652
203448_s_at	0.00439817	-0.00653763	0.00200158	-0.00265239	-0.00228758	0.0048958	-0.001804	0.00117105	0.000319334	0.00112496	0.00105261	-2.08555	3.79579	-0.439345	1.59898	0.0472003	8.89054	61.1109	9.03903e-07	8.13259e-05	AI347136	telomeric repeat binding factor (NIMA-interacting) 1	TERF1	7013	-0.00200158
203449_s_at	0.00438408	-0.00673221	0.000792829	-0.0033905	-0.00228648	0.00398066	-0.00215684	0.00124872	-0.000561315	0.000504523	0.00207185	-1.75175	3.57512	-0.644977	1.53614	-0.0340625	9.0695	127.527	3.35926e-08	1.57084e-05	NM_017489	telomeric repeat binding factor (NIMA-interacting) 1	TERF1	7013	-0.000792829
203474_at	0.00199144	-0.00950198	-0.00136603	0.00138074	-0.00141955	0.00278334	-0.00133615	0.00489879	-0.00064141	-0.00132603	-0.000525165	-1.22835	3.09562	0.146212	2.37884	-1.48689	6.09645	53.7088	1.59856e-06	0.000106655	NM_006633	IQ motif containing GTPase activating protein 2	IQGAP2	10788	0.00136603
203526_s_at	0.0040042	0.00720066	0.00310419	-0.00409864	0.000805081	-0.000113407	0.000149302	0.00306807	0.00202008	-0.0010388	0.000166812	-0.920043	-0.67843	-1.34291	-0.730432	2.52842	5.55709	70.1814	4.89096e-07	5.99078e-05	M74088	adenomatous polyposis coli	APC	324	-0.00310419
203606_at	0.00452583	-0.000826981	0.00871703	-0.00295519	-0.00158827	0.000711655	0.00197657	0.00306138	0.00146384	-0.000145939	-0.00256837	-1.57457	0.893996	0.294521	0.0923762	1.01864	11.1194	62.7607	8.03306e-07	7.68634e-05	NM_004553	NADH dehydrogenase (ubiquinone) Fe-S protein 6, 13kDa (NADH-coenzyme Q reductase)	NDUFS6	4726	-0.00871703
203622_s_at	0.00596173	0.0030258	0.000572194	-0.00225045	0.00253756	-0.000328226	-0.00192688	-0.0001715	-0.000784222	-0.000795595	-0.000609947	-1.36663	0.115837	-1.88163	0.907945	1.97714	8.14446	65.0554	6.8506e-07	7.10993e-05	NM_020143	partner of NOB1 homolog (S. cerevisiae)	PNO1	56902	-0.000572194
203685_at	-0.0018893	0.000631506	0.0116005	0.00424379	-0.000552635	-0.00212084	0.00548231	0.00127988	0.000851837	-0.00100771	0.000765888	-0.981839	-1.62887	2.93942	-1.07478	0.281708	5.92003	111.413	6.17639e-08	1.9836e-05	NM_000633	B-cell CLL/lymphoma 2	BCL2	596	-0.0116005
203715_at	0.00609936	-0.00255419	-0.000575527	0.00141821	0.00262625	4.88632e-06	0.000357151	0.000795286	-0.00172372	0.000500066	-0.000578384	-1.62062	0.663517	-1.23431	2.16477	0.779146	6.62567	53.1949	1.66768e-06	0.000109399	NM_003193	tubulin folding cofactor E	TBCE	6905	0.000575527
203743_s_at	0.0059327	0.000974593	0.00195209	-0.00480009	0.000789602	0.00160254	-0.00205184	0.000597796	-0.00010937	0.00112876	-0.00247006	-0.990057	0.855952	-0.937866	0.410417	1.05637	9.70271	57.2425	1.20695e-06	9.42992e-05	NM_003211	thymine-DNA glycosylase	TDG	6996	-0.00195209
203798_s_at	0.00590412	0.00120003	0.00119634	-0.00204829	0.00480659	-0.000259336	0.000330335	0.00449974	-0.000613043	0.000471476	-0.000492605	-2.14318	0.0925027	-1.94355	1.77335	2.22581	6.2086	102.921	8.82324e-08	2.30404e-05	NM_003385	visinin-like 1	VSNL1	7447	-0.00119634
203820_s_at	0.00536833	-0.00400464	-0.00373586	-0.00378402	0.00117912	-0.000408839	-0.00217836	0.000358573	-0.00173829	0.00101897	-0.00181942	-1.01942	1.85674	-1.62189	1.67814	0.363006	10.2465	54.1836	1.53776e-06	0.000104846	NM_006547	insulin-like growth factor 2 mRNA binding protein 3	IGF2BP3	10643	0.00373586
203856_at	0.00602991	-0.00117067	0.00332027	-0.00186597	0.00165902	0.00229916	-0.000442573	0.00151002	2.94422e-05	-8.72011e-05	-0.000832308	-2.67152	1.65641	-1.23752	1.66631	1.83352	8.05937	68.7701	5.35335e-07	6.29287e-05	NM_003384	vaccinia related kinase 1	VRK1	7443	-0.00332027
203872_at	-0.00141218	-0.00579464	0.00861543	-0.00235533	-0.00751143	0.00217989	-0.00163984	0.000141387	-0.00117544	0.000852293	-0.00039508	-0.959104	2.5537	2.06124	-0.91165	-0.65852	6.00986	49.381	2.31273e-06	0.000127101	NM_001100	actin, alpha 1, skeletal muscle	ACTA1	58	-0.00861543
203910_at	-0.00401884	-0.00535722	-0.00678606	0.00392693	-0.0027763	0.000384191	0.000967527	0.000657567	0.00023124	-0.000770711	-0.000861189	2.17796	0.782606	0.822253	0.930762	-3.60751	8.00215	65.3123	6.73183e-07	7.07883e-05	NM_004815	Rho GTPase activating protein 29	ARHGAP29	9411	0.00678606
203939_at	-0.00572562	0.000971223	-0.00444565	0.00128818	-0.00400305	0.00166902	-0.000602198	-0.00288591	0.000597008	5.21397e-05	0.000232214	2.04315	-0.353553	0.573557	-1.3446	-1.41126	5.06611	129.54	3.12997e-08	1.49945e-05	NM_002526	5'-nucleotidase, ecto (CD73)	NT5E	4907	0.00444565
203967_at	0.00624501	0.000397329	0.000761847	-0.0018078	0.00300566	0.000806028	-0.000474898	-0.000434907	-0.000613762	-0.000874006	-0.000259155	-1.86283	0.715046	-1.78036	1.59115	1.75062	5.89103	60.7159	9.30221e-07	8.26977e-05	U77949	cell division cycle 6 homolog (S. cerevisiae)	CDC6	990	-0.000761847
203998_s_at	0.00518849	0.00321742	0.00317458	-0.00630428	0.000651565	-2.3421e-05	-0.000751193	0.00221105	0.00390548	0.00389067	-0.000268437	-1.6434	0.982064	-1.53642	-0.0430092	2.369	5.78403	58.2468	1.11769e-06	8.94789e-05	AV723167	synaptotagmin I	SYT1	6857	-0.00317458
204009_s_at	0.00509531	-0.0031072	-0.00666171	-0.000188587	0.000650431	0.000198686	-0.0034224	0.00161484	-0.00167112	0.000758701	-0.00110929	-0.5337	1.1994	-1.78831	1.79971	0.126298	10.0886	53.831	1.58264e-06	0.000106444	W80678	v-Ki-ras2 Kirsten rat sarcoma viral oncogene homolog	KRAS	3845	0.00666171
204018_x_at	-0.00396337	-0.00260357	0.0090402	0.00377444	-0.00120086	-0.00136062	0.00379316	0.000229045	-0.000978505	9.8788e-06	-0.000380461	-0.544432	-1.19089	4.95442	-1.54024	-1.33472	7.35638	176.09	7.79847e-09	8.20899e-06	NM_000558	hemoglobin, alpha 1	HBA1	3039	-0.0090402
204061_at	0.00610215	-0.00117507	-0.000717059	-0.00224667	0.00374993	0.000779807	-0.000532387	0.0022468	0.000144267	0.000409787	0.000166525	-1.63256	1.00242	-1.74861	1.83255	1.24246	6.68158	136.111	2.50305e-08	1.36333e-05	NM_005044	protein kinase, X-linked	PRKX	5613	0.000717059
204143_s_at	0.00522553	0.004317	0.00253866	0.00113313	0.00382771	-0.00315709	0.00357819	0.003496	0.000519574	-6.1615e-05	-0.000767801	-1.60607	-1.78031	-1.1375	1.02462	2.27476	7.42545	54.091	1.5494e-06	0.000105139	NM_017512	enolase superfamily member 1	ENOSF1	55556	-0.00253866
204170_s_at	0.0060824	-0.00199271	-0.000711586	-0.00155106	0.00320245	-0.00240332	0.000601415	0.000371049	-0.000843557	0.000172138	-0.000744591	-1.66827	0.803818	-1.50974	2.02176	1.05899	11.0967	56.2475	1.30408e-06	9.77691e-05	NM_001827	CDC28 protein kinase regulatory subunit 2	CKS2	1164	0.000711586
204224_s_at	0.00589871	-0.00241749	-0.000241855	-0.00376181	0.00259927	0.00230935	-0.000259686	0.00171565	-0.000673717	-0.000324812	4.95257e-05	-1.93463	2.03073	-1.76743	1.87467	1.18623	6.77183	78.2035	3.01961e-07	4.80886e-05	NM_000161	GTP cyclohydrolase 1	GCH1	2643	0.000241855
204226_at	0.00560358	0.00297831	0.00203193	-0.00341546	0.00498259	0.000205016	-0.000285752	0.000666066	1.1024e-05	0.000917266	-0.000807347	-1.31231	-0.0880856	-1.35813	0.674856	1.79719	7.33449	59.7851	9.96032e-07	8.5262e-05	NM_014393	staufen, RNA binding protein, homolog 2 (Drosophila)	STAU2	27067	-0.00203193
204240_s_at	0.00601448	0.00164341	0.000596346	-0.00400134	0.00175533	-0.000152984	-0.00136647	0.00281533	-0.000265348	0.000807683	0.000745352	-1.76274	0.986333	-2.11558	1.09521	2.11421	7.19062	233.61	2.15848e-09	4.63466e-06	NM_006444	structural maintenance of chromosomes 2	SMC2	10592	-0.000596346
204269_at	0.00325105	-0.00785488	-0.00483712	0.00259592	0.00230197	-0.00110789	-0.000305514	0.00231172	-0.000831718	-0.000407614	0.00088231	-0.74301	1.21045	-0.70256	2.44625	-0.822934	7.11004	105.274	7.9707e-08	2.1478e-05	NM_006875	pim-2 oncogene	PIM2	11040	0.00483712
204286_s_at	0.00517167	-0.00475256	-0.00485122	-0.000169128	0.00161229	0.000205657	-0.00130748	0.00070433	-0.00179079	-0.000193996	-0.000551454	-1.47275	2.26296	-2.40541	3.40916	0.0492612	7.4397	126.764	3.45157e-08	1.57084e-05	NM_021127	phorbol-12-myristate-13-acetate-induced protein 1	PMAIP1	5366	0.00485122
204350_s_at	0.00318583	0.00573042	-0.00708942	-0.00546796	0.000397875	0.002301	-0.0039976	0.00138542	0.000935783	-0.000655814	0.000250391	0.437261	0.333203	-2.44919	-0.0647942	1.12766	7.72518	76.3658	3.35758e-07	5.07943e-05	NM_004270	mediator complex subunit 7	MED7	9443	0.00708942
204353_s_at	0.00572262	-0.000571485	-0.00408718	0.00116783	0.00467392	-0.00297806	0.00101213	0.000157596	0.00083942	0.000733803	-0.000469325	-1.01875	-0.271989	-1.90883	2.27412	0.865888	6.39945	54.7969	1.46335e-06	0.000103253	BC002923	protection of telomeres 1 homolog (S. pombe)	POT1	25913	0.00408718
204419_x_at	-0.00328199	-0.00227989	0.00928174	0.00556602	-0.00259467	-0.00102559	0.00505399	-2.74656e-05	-0.000576073	-0.000398606	0.000351755	-1.03662	-1.83904	6.3165	-1.62994	-1.47474	7.30417	109.009	6.81362e-08	2.0334e-05	NM_000184	hemoglobin, gamma A	HBG1	3047	-0.00928174
204459_at	0.00601626	-0.0014178	-8.13457e-05	0.00111765	0.00502505	8.35254e-05	-0.000999625	0.00222457	-0.000120408	0.000523806	-0.000868808	-1.13108	0.154177	-0.946453	1.47343	0.728372	7.6285	56.534	1.27516e-06	9.67227e-05	NM_001325	cleavage stimulation factor, 3' pre-RNA, subunit 2, 64kDa	CSTF2	1478	8.13457e-05
204465_s_at	0.00187756	-0.00887316	-0.00582528	0.000714042	-0.000843247	0.00157906	0.000758595	0.00162609	0.00115298	-0.000957576	-0.000685836	-0.462762	2.4043	-0.626378	2.30772	-1.45957	6.95506	59.8574	9.90719e-07	8.5262e-05	NM_004692	internexin neuronal intermediate filament protein, alpha	INA	9118	0.00582528
204469_at	0.00492397	-0.00614905	0.000617931	-0.00155121	0.00338365	0.00237572	-0.000553791	0.00128175	-0.00129166	7.06485e-06	-0.000192086	-3.38962	3.80966	-1.34255	4.01326	0.33926	7.58351	55.2436	1.4119e-06	0.000101325	NM_002851	protein tyrosine phosphatase, receptor-type, Z polypeptide 1	PTPRZ1	5803	-0.000617931
204500_s_at	0.00594867	-0.00340913	0.00104632	-0.00108415	0.000908941	0.00181926	-0.00192961	0.000873993	-0.00176126	0.00109474	0.00150182	-1.80959	1.74088	-1.08658	1.74331	0.791473	8.10819	55.3955	1.39491e-06	0.000100501	NM_015239	ATP/GTP binding protein 1	AGTPBP1	23287	-0.00104632
204581_at	-0.00468007	-0.00194339	0.00746544	0.00385155	-0.00238604	-0.000454768	0.00365642	-0.00262304	4.58951e-05	-0.00046852	0.00157669	0.0736203	-0.45239	1.80597	-0.756295	-0.622604	5.30221	65.2201	6.77415e-07	7.10089e-05	NM_001771	CD22 molecule	CD22	933	-0.00746544
204595_s_at	-0.00574743	0.00178336	-0.00413152	-0.00191487	-0.00409665	0.000323803	-0.000348117	-0.000516409	0.000209471	0.000592279	6.23624e-05	3.14537	-0.173846	0.641071	-2.67551	-1.73113	8.69668	56.3247	1.29621e-06	9.77691e-05	AI300520	stanniocalcin 1	STC1	6781	0.00413152
204597_x_at	-0.00565014	0.000526357	-0.00448334	-0.00177215	-0.0049662	0.00187142	0.00026683	-0.000619581	0.00149794	0.000596398	0.000262696	3.44224	0.633068	0.812167	-2.75169	-2.36025	7.2831	56.8736	1.24189e-06	9.54504e-05	NM_003155	stanniocalcin 1	STC1	6781	0.00448334
204702_s_at	0.0041476	-0.00731424	-0.0032782	0.000175581	0.0030051	-0.000428992	0.000433847	0.00181047	-0.00226429	-0.000950604	6.72757e-05	-1.82686	2.49485	-1.35623	3.88846	-0.692906	6.88903	87.2654	1.84972e-07	3.557e-05	NM_004289	nuclear factor (erythroid-derived 2)-like 3	NFE2L3	9603	0.0032782
204709_s_at	0.00609201	-0.00254728	0.000370506	-0.000659119	0.00270809	0.0016477	-0.00103089	0.00078037	-0.001265	0.000517673	-0.000339026	-2.65605	1.84987	-1.95579	2.88348	1.42097	6.96047	77.346	3.1719e-07	4.93524e-05	NM_004856	kinesin family member 23	KIF23	9493	-0.000370506
204727_at	0.00575808	-0.00397875	-0.00220043	-0.000318416	0.00223033	0.000794537	-0.00150297	4.58809e-05	-0.00107896	-0.000610182	-0.000781433	-1.85348	1.90691	-1.92491	2.87943	0.581504	5.44578	91.0766	1.52739e-07	3.12434e-05	AW772140	WD repeat and HMG-box DNA binding protein 1	WDHD1	11169	0.00220043
204728_s_at	0.00499703	-0.006018	-0.0017341	-0.00286062	0.00148122	0.00168563	-0.000296247	-0.00074117	-0.00132807	-0.000313532	0.000313579	-1.57197	2.55231	-1.23518	2.1713	0.0971208	6.11493	49.9534	2.19866e-06	0.000123408	NM_007086	WD repeat and HMG-box DNA binding protein 1	WDHD1	11169	0.0017341
204737_s_at	-0.00307913	-0.00513724	0.00738629	0.00551555	0.00179892	-0.00312193	0.00524391	0.000642488	0.000655869	-0.00182875	0.000710175	-0.930717	-1.45664	4.52058	0.302122	-1.79887	5.98444	75.2176	3.59224e-07	5.28795e-05	NM_000257	myosin, heavy chain 6, cardiac muscle, alpha	MYH6	4624	-0.00738629
204796_at	0.00590828	0.000755288	0.00200529	-0.00439565	0.0014215	0.00206388	-0.000651844	0.00369507	-0.0011504	0.000802816	0.00128837	-1.30898	0.96748	-1.11065	0.630026	1.3069	5.71847	68.3143	5.51395e-07	6.4071e-05	AI825937	echinoderm microtubule associated protein like 1	EML1	2009	-0.00200529
204810_s_at	-0.00395209	-0.00289575	0.00906447	0.00426813	-0.00119054	-0.000585185	0.00154302	0.000206188	0.000835673	-0.000976782	-0.000167406	-0.375575	-0.669172	3.52719	-1.06137	-1.04525	5.35578	51.6802	1.89371e-06	0.000116222	NM_001824	creatine kinase, muscle	CKM	1158	-0.00906447
204822_at	0.00573281	-0.00343326	0.00372883	-0.00123057	0.000875503	0.000711804	0.00171767	-0.000464953	-0.00110509	0.000112304	0.000280128	-2.66844	1.82209	-0.545048	1.89838	1.15886	7.93093	56.9302	1.23646e-06	9.54504e-05	NM_003318	TTK protein kinase	TTK	7272	-0.00372883
204832_s_at	0.00412542	-0.0057049	-0.00511323	-0.00370859	-0.00251912	0.0037239	-0.00364081	-0.000437181	-0.000788979	-0.00129426	-0.00051192	-0.495868	2.15371	-1.12343	1.07563	-0.190167	7.96072	54.6963	1.47525e-06	0.000103691	NM_004329	bone morphogenetic protein receptor, type IA	BMPR1A	657	0.00511323
204848_x_at	-0.00344332	-0.00185762	0.00922813	0.00553381	-0.00241818	-0.00108573	0.00498723	0.000314862	-0.000230236	-0.000991301	0.000742828	-0.832387	-1.97677	5.89615	-1.69021	-1.31265	7.46197	113.141	5.76277e-08	1.91598e-05	NM_000559	hemoglobin, gamma A	HBG1	3047	-0.00922813
204897_at	0.00364759	0.00616691	0.00549932	-0.00571719	0.00161597	-0.000238091	8.00968e-05	0.00367175	-0.000444363	-2.15172e-05	-0.000256736	-1.60008	-0.421863	-1.07821	-1.22879	3.2787	5.81683	95.0175	1.26316e-07	2.77729e-05	AA897516	prostaglandin E receptor 4 (subtype EP4)	PTGER4	5734	-0.00549932
204905_s_at	0.00617073	0.00153308	-0.000980225	-0.00195366	0.00168935	0.000670155	-0.00292125	0.00108253	-0.00053815	0.000468428	0.00158463	-1.37768	0.74161	-2.17999	1.32467	1.70068	8.6697	61.1518	9.01229e-07	8.13259e-05	NM_004280	eukaryotic translation elongation factor 1 epsilon 1	EEF1E1	9521	0.000980225
204939_s_at	-0.00355756	-0.0032689	0.00919216	0.0038949	-0.00180188	-0.00171564	0.00417335	-0.000904879	0.000305898	-0.00217598	0.000350178	-0.845654	-0.907109	5.29029	-1.37363	-1.46309	5.81263	226.972	2.46105e-09	4.63466e-06	NM_002667	phospholamban	PLN	5350	-0.00919216
204940_at	-0.00333416	-0.00309202	0.00962293	0.0041367	-0.000688523	-0.000782238	0.00489779	-0.000102997	0.000193436	-0.000309746	0.000271209	-0.779444	-0.893217	3.97364	-0.918782	-0.959389	4.20244	222.832	2.67605e-09	4.71442e-06	NM_002667	phospholamban	PLN	5350	-0.00962293
205030_at	0.00447375	0.00206518	0.00337416	-0.00953449	-0.00065613	0.000793835	-0.00258347	0.00332762	4.8526e-05	0.000863512	0.000788989	-1.50409	2.12116	-1.41511	-0.498485	2.07277	6.98266	50.7013	2.05974e-06	0.000120308	NM_001446	fatty acid binding protein 7, brain	FABP7	2173	-0.00337416
205044_at	0.00178325	-0.00971486	-0.00250022	0.00221214	0.00210394	-0.000218347	-0.000113294	0.0017188	0.000454838	-0.000979528	0.000289395	-0.807577	1.59148	0.0700429	2.2155	-1.24661	5.2856	71.2068	4.58527e-07	5.76028e-05	NM_014211	gamma-aminobutyric acid (GABA) A receptor, pi	GABRP	2568	0.00250022
205046_at	0.00603161	-0.000974238	0.000968113	-0.00304826	0.00381245	0.000597575	-0.00231851	0.000633883	-0.000250886	0.000891154	-0.000971709	-1.69293	1.10139	-1.4988	1.46925	1.3455	7.54263	62.1566	8.38478e-07	7.81055e-05	NM_001813	centromere protein E, 312kDa	CENPE	1062	-0.000968113
205054_at	0.000769615	-0.0045692	-0.000605219	-0.0101673	-0.00733958	0.00689497	-0.00471004	0.00106886	0.000609968	0.00163192	-0.000422132	-0.260658	3.52854	-0.467429	-0.5346	-0.247504	4.82863	65.151	6.8061e-07	7.1071e-05	NM_004543	nebulin	NEB	4703	0.000605219
205066_s_at	0.00287203	-0.00836679	-0.00103343	-0.00405804	-0.00221708	0.0034422	-0.00324595	0.00372897	-0.000244043	0.000546974	-0.000791798	-1.07921	3.34695	-0.449602	1.31859	-0.615762	7.01728	67.6193	5.77028e-07	6.51099e-05	NM_006208	ectonucleotide pyrophosphatase/phosphodiesterase 1	ENPP1	5167	0.00103343
205169_at	0.00569116	0.00192446	-0.00178883	0.00152708	0.00594421	-0.00282794	-0.000453377	0.00111941	0.00253787	0.00152604	-0.000527199	-0.944221	-0.865907	-1.54521	1.56893	1.21705	6.79199	69.2335	5.19586e-07	6.21426e-05	NM_005057	retinoblastoma binding protein 5	RBBP5	5929	0.00178883
205229_s_at	0.00563313	0.00231167	0.00249634	-0.00425304	0.00391512	0.000464441	-0.00204524	0.00232588	0.000312937	0.000214671	5.68169e-06	-2.46452	0.717678	-2.34773	1.04769	3.09199	7.67889	91.9794	1.46133e-07	3.02302e-05	AA669336	coagulation factor C homolog, cochlin (Limulus polyphemus)	COCH	1690	-0.00249634
205239_at	-0.004987	0.00181788	-0.00684494	-0.00145907	-0.0047892	0.000789304	-0.000522449	-0.00294667	0.000409072	-0.000666992	7.10452e-05	3.81206	0.0859685	-0.336163	-2.39005	-2.02324	6.70636	65.7224	6.5474e-07	6.97024e-05	NM_001657	amphiregulin	AREG	374	0.00684494
205280_at	0.00423533	0.00680672	0.00403216	-0.000967036	0.00300623	-0.0025114	0.000784995	0.0015384	0.000453545	-5.1915e-05	-0.000330685	-1.21781	-1.79428	-1.05517	-0.185736	2.64317	5.29403	122.513	4.02584e-08	1.69126e-05	NM_000824	glycine receptor, beta	GLRB	2743	-0.00403216
205321_at	0.00594874	0.00273887	-0.00174975	-0.00168275	0.00217405	-0.00233066	-0.00177091	0.00125703	0.00165876	-0.00116589	0.000775103	-1.18602	-0.017969	-2.33814	1.31909	1.87138	7.84915	54.4161	1.50903e-06	0.000104594	NM_001415	eukaryotic translation initiation factor 2, subunit 3 gamma, 52kDa	EIF2S3	1968	0.00174975
205348_s_at	0.004219	0.00591984	0.004353	-0.00411896	0.00217384	-0.00438781	0.000488037	0.00186644	0.00130968	-0.000186296	0.000663499	-1.5637	-1.14531	-1.25162	-0.473042	3.09525	7.20233	51.0313	2.00186e-06	0.000118645	NM_004411	dynein, cytoplasmic 1, intermediate chain 1	DYNC1I1	1780	-0.004353
205350_at	0.00423415	-0.0067648	-0.00461703	0.000396848	-0.000564006	-0.000193425	-0.00127581	0.00410298	-0.000661855	-0.000468699	0.000758105	-1.16148	2.41331	-1.39251	2.78302	-0.569961	7.48831	53.6375	1.60794e-06	0.000106655	NM_004378	cellular retinoic acid binding protein 1	CRABP1	1381	0.00461703
205399_at	0.00261257	-0.00918182	-0.00287616	0.00153171	0.000949374	0.00173438	-0.00162884	0.0014971	-0.000909913	0.000557355	0.000175598	-1.8683	4.30257	-0.629655	4.61653	-2.2238	7.13008	266.72	1.1803e-09	4.63466e-06	NM_004734	doublecortin-like kinase 1	DCLK1	9201	0.00287616
205401_at	0.0054052	0.0011159	-0.0029267	-0.00690632	-0.00106358	0.00132209	-0.00282541	0.000781912	0.00296897	-0.000480115	-0.000444998	-0.607675	1.37751	-1.65301	0.420402	0.970242	6.3303	54.1068	1.5474e-06	0.000105139	NM_003659	alkylglycerone phosphate synthase	AGPS	8540	0.0029267
205430_at	0.00326685	0.00754667	0.00421548	-0.00523845	0.00168192	-0.00151361	0.000740059	-9.24519e-06	2.72251e-05	-0.000958439	0.000237949	-0.987936	-1.10474	-1.21214	-1.31033	3.03782	4.56979	151.166	1.55737e-08	1.09042e-05	AL133386	bone morphogenetic protein 5	BMP5	653	-0.00421548
205431_s_at	0.00282778	0.00839031	0.00326728	-0.00480878	0.00147378	-0.0014859	-2.32204e-05	-0.00124976	-0.000947168	-0.00198727	0.000781826	-0.463503	-1.09644	-1.07509	-1.17019	2.32583	5.78591	88.2367	1.76028e-07	3.51471e-05	NM_021073	bone morphogenetic protein 5	BMP5	653	-0.00326728
205463_s_at	0.001608	-0.00929013	-0.00383765	0.00375136	0.00173619	0.000642175	-0.000811803	0.00239896	-0.00038273	-0.000211377	-0.000228358	-1.04143	2.49087	-0.150065	4.10191	-2.42343	6.43454	235.347	2.08695e-09	4.63466e-06	NM_002607	platelet-derived growth factor alpha polypeptide	PDGFA	5154	0.00383765
205474_at	0.006207	5.50327e-05	0.0006683	-0.00173236	0.00167841	0.00170521	-0.00280311	0.00272439	-6.16963e-06	0.00104713	-0.000417269	-1.49761	0.982158	-1.50062	1.24508	1.34059	8.40944	49.3781	2.31334e-06	0.000127101	NM_015986	cytokine receptor-like factor 3	CRLF3	51379	-0.0006683
205478_at	0.000596579	-0.00825786	-0.000870614	0.00793742	0.00392299	-0.00209815	0.00335366	0.00379975	0.000452506	0.00106365	-0.00023148	-0.780466	-0.251697	0.955909	2.60304	-1.50827	5.97979	85.9638	1.97841e-07	3.72575e-05	NM_006741	protein phosphatase 1, regulatory (inhibitor) subunit 1A	PPP1R1A	5502	0.000870614
205480_s_at	0.00277573	-0.00629269	-0.007447	-0.00410331	-0.00326294	0.00218354	-0.00353347	0.000855179	-0.000222246	-0.000251789	-2.24512e-05	-0.141835	2.28037	-1.19249	1.07489	-0.539888	10.8039	57.5623	1.17762e-06	9.26702e-05	NM_006759	UDP-glucose pyrophosphorylase 2	UGP2	7360	0.007447
205514_at	-0.000206983	-0.00835945	-0.00667459	0.00469304	0.000419396	0.0030778	0.00013825	0.00158033	-0.000450656	0.00160317	-0.000246535	0.190954	1.17824	-0.14008	1.93282	-1.77886	5.63922	51.453	1.93075e-06	0.000117552	NM_018355	zinc finger protein 415	ZNF415	55786	0.00667459
205541_s_at	0.00612247	-0.00189258	-0.00223965	-0.000901341	0.0023106	0.00108056	-0.00121532	0.000196611	-0.000618978	0.000965077	0.000469768	-1.00558	0.839017	-1.31286	1.43479	0.64462	8.35801	52.4406	1.77587e-06	0.000111205	NM_018094	G1 to S phase transition 2	GSPT2	23708	0.00223965
205543_at	0.00497254	0.00522596	0.0031075	-0.00394867	0.00208139	-0.00157472	0.000785373	0.00271059	0.000709986	-0.000339226	-0.000743773	-1.73231	-0.570325	-1.75075	-0.0174105	3.10119	6.25868	167.951	9.66524e-09	8.51367e-06	NM_014278	heat shock 70kDa protein 4-like	HSPA4L	22824	-0.0031075
205589_at	-0.00456037	-0.00284802	0.0076293	0.00388938	-0.00210333	-0.00118369	0.00252195	-0.000406043	-0.000628772	-0.00140602	0.000672486	-0.00999055	-0.618211	3.28061	-1.12927	-1.21817	7.05514	110.176	6.49484e-08	2.02965e-05	NM_000258	myosin, light chain 3, alkali; ventricular, skeletal, slow	MYL3	4634	-0.0076293
205603_s_at	0.00529647	-0.00551194	-0.000537254	0.00131231	0.00245579	0.0015845	-0.00134136	0.00165119	-0.000187404	0.00108508	-0.000475948	-2.43538	2.22823	-1.31808	3.51886	0.225455	7.52133	87.581	1.82006e-07	3.53734e-05	NM_007309	diaphanous homolog 2 (Drosophila)	DIAPH2	1730	0.000537254
205625_s_at	0.000698849	-0.00584718	-0.00037096	-0.00799388	-0.0086398	0.00592191	-0.00458937	0.00278302	0.00125907	0.00191736	0.000215671	-0.36122	3.6791	-0.235292	-0.314802	-0.498418	4.42754	55.0003	1.43965e-06	0.000102374	AW014927	calbindin 1, 28kDa	CALB1	793	0.00037096
205626_s_at	-0.000304444	-0.00695599	0.000924371	-0.00670742	-0.00845642	0.00437008	-0.00559309	0.000122601	0.00146848	0.00232549	0.000404316	-0.399996	4.42103	0.307138	-0.446582	-0.980719	4.50091	65.1783	6.79347e-07	7.1071e-05	NM_004929	calbindin 1, 28kDa	CALB1	793	-0.000924371
205668_at	0.00299394	-0.00820041	-0.00533072	-0.000338572	0.000568114	0.000570001	-0.00243902	0.000927292	-0.00196708	0.000512664	0.000382559	-0.493944	1.71062	-0.735891	1.6878	-0.710869	4.28085	68.7565	5.35804e-07	6.29287e-05	NM_002349	lymphocyte antigen 75	LY75	4065	0.00533072
205739_x_at	0.00597145	-0.00300696	8.43332e-05	-0.00170658	0.00252734	0.00214704	-0.000597482	0.00103263	-0.00199166	-0.000184059	0.000847781	-1.84292	1.63037	-1.39737	1.97394	0.915083	6.59865	73.366	4.01422e-07	5.58321e-05	NM_016220	zinc finger protein 107	ZNF107	51427	-8.43332e-05
205752_s_at	-0.0056398	-0.00197475	0.00392388	0.00144496	-0.00480167	0.000545207	0.00254859	-0.0013658	-0.000320261	0.000494131	0.000166422	0.69193	0.0516205	2.10021	-1.36651	-1.19827	6.81273	118.67	4.64809e-08	1.78765e-05	NM_000851	glutathione S-transferase mu 5	GSTM5	2949	-0.00392388
205763_s_at	0.0057924	0.00049741	-0.00338818	-0.00340704	0.00262802	0.00265343	-0.00328668	0.0010088	0.00133017	-0.00018232	-0.00100471	-0.886176	1.10615	-2.17488	1.25468	1.13093	7.4894	65.7461	6.53692e-07	6.97024e-05	NM_006773	DEAD (Asp-Glu-Ala-Asp) box polypeptide 18	DDX18	8886	0.00338818
205805_s_at	-0.000293496	-0.010118	-0.0032095	0.00183538	-0.000336806	0.000968531	0.000293946	0.000843281	-0.000445851	-0.00238223	7.46198e-05	-0.30217	2.011	0.476662	1.79478	-1.88246	6.561	77.6397	3.11871e-07	4.89291e-05	NM_005012	receptor tyrosine kinase-like orphan receptor 1	ROR1	4919	0.0032095
205818_at	0.000237527	-0.00979288	-0.00376856	0.00302684	0.000601182	0.00215444	-0.00173951	0.00054607	0.000206516	-0.00014278	-1.37609e-05	-0.270153	1.6845	0.178523	1.81041	-1.6173	5.90805	80.1503	2.70565e-07	4.56149e-05	NM_014618	deleted in bladder cancer 1	DBC1	1620	0.00376856
205826_at	-0.00373335	-0.00119658	0.00948468	0.00368232	-0.00316154	-0.000482783	0.00465128	-0.000502747	0.000229843	-0.00327567	0.00112776	-0.236349	-0.531355	2.17291	-0.945845	-0.404579	5.86538	64.4155	7.15767e-07	7.25831e-05	NM_003970	myomesin (M-protein) 2, 165kDa	MYOM2	9172	-0.00948468
205885_s_at	0.00350886	0.00734371	0.00371548	-0.00493147	0.00169778	-0.00202606	-0.00139156	0.00272224	0.00125104	-0.000758081	0.000387066	-0.745284	-0.731969	-1.0772	-0.81203	2.24876	4.44297	76.5785	3.31619e-07	5.04477e-05	L12002	integrin, alpha 4 (antigen CD49D, alpha 4 subunit of VLA-4 receptor)	ITGA4	3676	-0.00371548
205893_at	0.00416335	-0.00606868	-0.00451276	0.00325278	0.0049471	-0.000939263	-0.000293303	-0.00124511	-0.00138875	0.00118316	-6.47741e-05	-0.847072	0.564722	-0.986823	2.58287	-0.405196	4.52736	51.596	1.90732e-06	0.000116723	NM_014932	neuroligin 1	NLGN1	22871	0.00451276
205919_at	-0.00371691	-0.00345637	0.0095558	0.00252892	-0.00138082	-0.00143377	0.00194056	0.000767214	-0.000123183	-0.000527433	0.000109629	-0.779626	-0.30468	4.73398	-1.4781	-1.2894	6.04755	57.0284	1.22708e-06	9.51816e-05	NM_005330	hemoglobin, epsilon 1	HBE1	3046	-0.0095558
205930_at	0.00539537	-0.00370459	0.00164299	-0.00440482	-0.0001815	0.00437076	-0.000417399	0.00346255	0.00033723	0.000496373	-0.000613094	-1.75226	2.4842	-0.939596	1.17819	0.765131	7.88243	54.135	1.54386e-06	0.000105131	NM_005513	general transcription factor IIE, polypeptide 1, alpha 56kDa	GTF2E1	2960	-0.00164299
205977_s_at	0.00237806	-0.00893485	-0.00394903	0.00150737	0.00307327	-0.000122342	0.000656479	0.00287765	-4.92865e-05	0.0019856	-0.000141309	-0.871687	1.68068	-0.415516	2.7036	-1.21393	6.56096	50.6207	2.0742e-06	0.000120651	NM_005232	EPH receptor A1	EPHA1	2041	0.00394903
206002_at	-0.000566917	-0.00997697	0.0035379	0.000285539	-0.00229651	0.000783924	0.000688669	0.00159259	0.00199362	0.0011552	-0.000466562	-0.980182	2.32636	1.57072	0.909357	-1.44865	5.8629	60.1196	9.71745e-07	8.4641e-05	NM_005756	G protein-coupled receptor 64	GPR64	10149	-0.0035379
206023_at	0.00169029	-0.00998031	0.00155568	0.00198518	-0.000603631	0.000391696	0.000320845	0.00158268	-0.00022411	0.00131501	6.09982e-05	-1.69528	2.7517	1.05835	2.41953	-1.54053	7.03011	173.524	8.33547e-09	8.20899e-06	NM_006681	neuromedin U	NMU	10874	-0.00155568
206103_at	0.00485818	0.00646727	0.00150761	-0.00120976	0.00269475	-0.00089034	-0.000177556	0.00171737	-0.00035465	-0.000770271	-0.000186014	-1.03953	-1.27929	-1.72267	0.175913	2.49713	7.18643	73.0836	4.08378e-07	5.60371e-05	NM_005052	ras-related C3 botulinum toxin substrate 3 (rho family, small GTP binding protein Rac3)	RAC3	5881	-0.00150761
206117_at	-0.000748678	-0.00715971	0.00870583	0.00235489	-0.00371904	0.000633643	0.00251111	0.00275926	0.000271352	-0.00286406	0.000749776	-1.6577	1.71243	2.98839	0.215689	-1.04916	8.44208	78.7846	2.92145e-07	4.76267e-05	NM_000366	tropomyosin 1 (alpha)	TPM1	7168	-0.00870583
206140_at	0.000681265	-0.00667316	0.00330624	0.00990126	0.00465306	-0.00361226	0.00209302	0.00119391	-0.000280187	-0.00179389	-0.000290657	-1.53098	-1.53016	2.14954	3.03594	-1.41596	5.73024	54.6651	1.47897e-06	0.000103819	NM_004789	LIM homeobox 2	LHX2	9355	-0.00330624
206205_at	0.00620638	-0.00043137	-0.00193602	-0.00205324	0.00246284	0.000216488	-0.000545947	0.000532281	-0.00142483	0.000933341	-0.000716422	-1.31901	0.87614	-1.88106	1.64249	1.18601	6.51915	84.3943	2.14841e-07	3.89805e-05	NM_022782	M-phase phosphoprotein 9	MPHOSPH9	10198	0.00193602
206254_at	0.00341973	-0.00657563	-0.00617308	0.00343837	0.00343468	0.00165512	-0.00049032	0.00320502	0.000542296	-0.000852873	-0.000354987	-0.556938	0.927211	-1.03335	2.47846	-0.715535	4.90258	64.3902	7.17019e-07	7.25831e-05	NM_001963	epidermal growth factor	EGF	1950	0.00617308
206331_at	0.00110186	0.00955626	0.00410188	-0.00339915	0.000527943	0.00134035	-0.000998278	0.000398551	-0.000983096	-0.00109473	-0.00081859	-0.0332492	-1.35979	-0.593568	-1.75669	2.05335	6.47356	53.9824	1.56318e-06	0.000105525	NM_005795	calcitonin receptor-like	CALCRL	10203	-0.00410188
206364_at	0.0057326	-0.0038304	0.000998021	-0.000576807	0.00422249	0.000333218	0.000202591	0.000701101	-0.000611742	0.000882727	-0.000402569	-2.34657	1.36082	-1.17903	2.65378	0.909793	7.88653	86.608	1.9134e-07	3.66655e-05	NM_014875	kinesin family member 14	KIF14	9928	-0.000998021
206376_at	0.00423522	0.0061338	0.00268755	-0.005599	0.00303147	-0.002582	0.00104826	0.001483	0.00110635	-0.000563811	-0.000432173	-1.37911	-0.899427	-1.88657	-0.506216	3.27411	6.62325	63.3787	7.69163e-07	7.54152e-05	NM_018057	solute carrier family 6 (neutral amino acid transporter), member 15	SLC6A15	55117	-0.00268755
206433_s_at	0.00292747	0.00730391	0.0059971	-0.00433466	0.00301177	9.43873e-05	-0.000560916	0.00114042	0.000906276	-0.00114238	-0.000966074	-0.907925	-0.99364	-0.580991	-1.08312	2.34855	4.76708	65.6191	6.59329e-07	6.9823e-05	BC000460	sparc/osteonectin, cwcv and kazal-like domains proteoglycan (testican) 3	SPOCK3	50859	-0.0059971
206434_at	0.00316893	0.00755087	0.00500457	-0.00436374	0.00253192	-0.000179087	-0.000543718	0.00147925	-0.000120808	-0.000537247	-0.000173634	-1.07017	-1.24479	-1.05108	-1.29077	3.04633	4.61758	137.215	2.41329e-08	1.34487e-05	NM_016950	sparc/osteonectin, cwcv and kazal-like domains proteoglycan (testican) 3	SPOCK3	50859	-0.00500457
206465_at	0.00281263	-0.00638704	-0.00541788	0.00645832	0.00460216	-0.00271472	-0.000521393	0.00256586	-0.00142698	-0.000352807	0.00126602	-0.364345	-0.0403295	-0.464726	1.93767	-0.604171	5.1421	56.2207	1.30683e-06	9.77691e-05	BE856376	acyl-CoA synthetase bubblegum family member 1	ACSBG1	23205	0.00541788
206502_s_at	0.00272134	-0.00622723	-0.0052511	0.00606397	0.00655298	-0.00139958	0.00128071	0.00241153	-0.00039535	0.00126676	-0.000265484	-0.591535	-0.282735	-0.686078	3.04671	-0.887972	4.53164	111.276	6.21089e-08	1.9836e-05	NM_002196	insulinoma-associated 1	INSM1	3642	0.0052511
206548_at	0.00132477	-0.00964862	-0.00202844	-0.00312606	-0.0026417	0.00320684	-0.00144456	-0.000581407	0.000672261	0.00121077	-0.00104514	-0.739845	3.49635	-0.0577098	1.3561	-1.2912	5.38912	67.8185	5.69532e-07	6.4935e-05	NM_024880	---	---		0.00202844
206565_x_at	0.00447836	0.0054091	0.00569648	-0.00312478	0.00208457	-0.000398284	0.000691646	0.00269196	0.000598896	0.000298113	-0.000569197	-1.0033	-0.409835	-0.499596	-0.229479	1.62596	5.78726	79.0452	2.87871e-07	4.73539e-05	NM_006780	glucuronidase, beta pseudogene	SMA4	11039	-0.00569648
206632_s_at	-0.000557154	-0.00154128	0.00389478	-0.0110894	-0.00800024	0.00648088	-0.00392158	0.00189554	0.00176546	-0.00133765	-0.000701268	-0.387779	4.42869	0.234885	-2.21503	0.231644	5.78186	56.5968	1.26893e-06	9.66526e-05	NM_004900	apolipoprotein B mRNA editing enzyme, catalytic polypeptide-like 3B	APOBEC3B	9582	-0.00389478
206653_at	0.00572151	-0.0040149	0.000804961	-0.00259561	0.00203779	0.00221974	-3.22966e-05	0.00052346	-0.000520115	0.000391557	0.000370907	-2.43753	2.5564	-1.41691	2.35534	0.959781	6.30184	81.7193	2.48118e-07	4.32922e-05	BF062139	polymerase (RNA) III (DNA directed) polypeptide G (32kD)	POLR3G	10622	-0.000804961
206783_at	0.0021368	-0.00888334	-0.00442531	0.00321206	0.00127057	0.00125201	-0.00209399	0.00236689	0.000398904	-0.000155674	0.000330344	-0.700092	1.92472	-0.46154	2.74459	-1.46351	6.71771	115.069	5.34049e-08	1.86967e-05	BF510715	fibroblast growth factor 4	FGF4	2249	0.00442531
206858_s_at	-0.00342198	0.00833625	0.00334072	-0.00115423	-0.00128013	0.00102784	0.00215791	-0.00166611	-8.42354e-05	0.000943147	-0.00025981	1.93843	-3.61367	1.24386	-4.66456	1.54659	8.5503	100.101	9.99662e-08	2.45372e-05	NM_004503	homeobox C6	HOXC6	3223	-0.00334072
206893_at	0.00281508	-0.00659813	-0.00632896	0.00557622	0.00247459	-0.00332976	-0.000224485	0.00268917	-0.00117699	0.000571403	0.000812605	-0.671874	0.499855	-1.231	4.16372	-1.44989	5.57628	52.7277	1.73371e-06	0.000111079	NM_002968	sal-like 1 (Drosophila)	SALL1	6299	0.00632896
206935_at	0.00321873	-0.00841538	-0.00403408	0.00118031	0.00135701	0.00127384	-0.000196647	0.00117148	-0.00164901	0.00133854	0.000267618	-0.800632	1.71472	-0.587019	2.13995	-0.806228	4.1939	99.318	1.03554e-07	2.5135e-05	NM_002590	protocadherin 8	PCDH8	5100	0.00403408
206960_at	0.00340115	-0.00702876	-0.00394496	0.00552849	0.00267979	-0.00161581	0.0029313	0.00169379	-0.00297317	0.000340799	0.000771682	-0.951727	0.43783	-0.465212	2.90921	-0.823546	5.42101	52.1489	1.81998e-06	0.000113077	NM_005296	lysophosphatidic acid receptor 4	LPAR4	2846	0.00394496
207016_s_at	-0.00461544	-0.00206178	0.007571	0.00367633	-0.00128816	-0.00166004	0.0048029	9.36048e-05	-0.00153042	-0.00167032	-0.000302198	0.0217393	-1.21904	3.7306	-1.34005	-1.20909	6.31166	126.797	3.44744e-08	1.57084e-05	AB015228	aldehyde dehydrogenase 1 family, member A2	ALDH1A2	8854	-0.007571
207039_at	0.00273425	0.00803703	0.00443332	-0.00490423	0.00145236	-0.00235727	0.000428633	0.00196323	-0.000439659	-0.000892426	-3.49828e-05	-0.811745	-1.39417	-1.01486	-1.48729	2.94457	5.86547	114.905	5.37488e-08	1.86967e-05	NM_000077	cyclin-dependent kinase inhibitor 2A (melanoma, p16, inhibits CDK4)	CDKN2A	1029	-0.00443332
207148_x_at	-0.00416219	-0.00298665	0.00825396	0.00431392	-0.00184193	-0.000825134	0.0030357	-0.000726484	0.00219045	-0.00238084	0.000382576	-0.240741	-0.733202	3.77057	-1.13746	-1.27026	4.98158	105.469	7.90459e-08	2.1478e-05	NM_016599	myozenin 2	MYOZ2	51778	-0.00825396
207183_at	0.00180464	-0.00894714	-0.00477635	0.0030938	0.0027329	-0.00112941	-9.73864e-05	0.00197369	-0.000755896	4.91707e-05	-8.74645e-05	-0.7728	1.73062	-0.436843	3.5414	-1.87378	6.00413	107.608	7.22194e-08	2.10915e-05	NM_006143	G protein-coupled receptor 19	GPR19	2842	0.00477635
207197_at	0.00295519	-0.00856236	-0.00460372	0.000122616	-0.000774165	0.00103839	-0.000964403	0.00166393	0.000187878	0.000291489	-0.000106795	-1.3106	4.08181	-1.25328	3.73026	-1.70133	5.29802	202.81	4.10599e-09	5.93951e-06	NM_003413	Zic family member 3 (odd-paired homolog, Drosophila)	ZIC3	7547	0.00460372
207302_at	-0.00408032	-0.00372819	0.00711596	0.00431869	-0.0012905	-0.000832907	0.00667507	-0.000396278	-0.00159678	-0.00134062	-0.000705711	-0.173283	-0.565969	2.54643	-0.505017	-0.999001	5.61107	69.1039	5.23935e-07	6.21426e-05	NM_000231	sarcoglycan, gamma (35kDa dystrophin-associated glycoprotein)	SGCG	6445	-0.00711596
207480_s_at	-0.00231178	0.00942524	0.00251688	0.00177742	0.000279836	-0.00135226	0.00232934	-0.00135136	0.00229043	-0.000311888	-0.00130897	1.11664	-3.50354	0.424418	-2.30425	1.30443	9.37751	66.4009	6.25558e-07	6.79293e-05	NM_020149	Meis homeobox 2	MEIS2	4212	-0.00251688
207822_at	0.00247467	-0.00807824	-0.00593111	0.00156032	0.000777638	0.000898349	-0.00424908	0.000926834	-0.0039709	-0.000993046	0.000682699	-0.411932	1.89499	-0.900111	2.21219	-1.09445	5.12819	51.4257	1.93525e-06	0.000117695	NM_023107	fibroblast growth factor receptor 1	FGFR1	2260	0.00593111
208002_s_at	0.00580854	-0.000386758	0.00398278	-0.00447812	-5.30343e-05	0.00135285	-0.000898201	0.000634988	0.000173736	0.000730706	-0.00177079	-1.92913	1.63893	-0.948636	0.663158	1.57313	8.38727	109.054	6.8011e-08	2.0334e-05	NM_007274	acyl-CoA thioesterase 7	ACOT7	11332	-0.00398278
208079_s_at	0.00542166	-0.0046063	0.00311212	-0.00125274	0.00313678	-0.000455575	0.000214366	0.000266806	-0.000621505	0.000690082	-5.12686e-05	-2.41715	1.61625	-0.516025	2.14566	0.791976	9.10724	70.0711	4.92531e-07	5.99078e-05	NM_003158	aurora kinase A	AURKA	6790	-0.00311212
208119_s_at	0.00277214	-0.00930623	-0.00195331	0.00165033	0.000247003	-0.000409388	-0.00109709	0.000321072	0.000704529	-0.000154665	-0.000367859	-1.01993	1.95061	-0.12313	2.16026	-0.988353	7.00526	76.6608	3.30033e-07	5.04477e-05	NM_031218	zinc finger protein 93	ZNF93	81931	0.00195331
208152_s_at	0.00563731	0.000823686	-0.000438496	-0.00700829	0.000702718	0.00231874	-0.00076715	0.000543281	0.000122788	0.000394644	0.00163132	-1.17836	1.64118	-1.76636	0.5585	1.43654	10.3621	62.1411	8.39404e-07	7.81055e-05	NM_004728	DEAD (Asp-Glu-Ala-Asp) box polypeptide 21	DDX21	9188	0.000438496
208195_at	-0.00335905	-0.00621416	0.00747845	0.0028229	-0.00120819	-0.00191431	0.00275518	0.00058508	0.000537328	-0.00165397	0.000176482	-0.933515	0.560344	4.77542	-0.363244	-2.19472	7.22632	59.2751	1.03449e-06	8.63864e-05	NM_003319	titin	TTN	7273	-0.00747845
208275_x_at	0.00113065	-0.00834174	0.000418725	-0.00430856	-0.00641338	0.0051632	-0.00455234	0.000552223	0.00225749	-0.00123596	0.000522224	-0.754263	3.8733	0.129819	0.454933	-0.926671	5.65922	76.5945	3.3131e-07	5.04477e-05	NM_003577	undifferentiated embryonic cell transcription factor 1	UTF1	8433	-0.000418725
208286_x_at	0.0026756	-0.00835376	-0.00513298	0.0027183	0.00139594	0.00128584	-0.000395849	0.00242862	-0.000839236	-0.000851604	0.00134428	-0.799148	1.9845	-0.790662	3.05317	-1.37069	8.70756	170.868	8.93945e-09	8.27475e-06	NM_002701	POU class 5 homeobox 1	POU5F1	5460	0.00513298
208369_s_at	0.00605458	0.00214354	0.00115962	-0.00220335	0.00227886	-0.000329508	0.00196097	0.00273403	0.000785207	-0.000858072	0.00124296	-1.40706	0.126901	-1.34768	0.934513	1.6402	6.69626	58.3101	1.11234e-06	8.94789e-05	NM_013976	glutaryl-CoA dehydrogenase	GCDH	2639	-0.00115962
208447_s_at	0.00621721	-0.000842396	-0.00110746	0.000921386	0.00271728	-0.00202623	-0.00141494	0.0011794	-0.000766539	-0.000340537	0.000389781	-1.92962	0.406761	-2.0881	2.6299	1.43283	6.82491	56.269	1.30188e-06	9.77691e-05	NM_002764	phosphoribosyl pyrophosphate synthetase 1	PRPS1	5631	0.00110746
208644_at	0.00566836	-0.00452771	0.00148422	-0.00108406	0.00159295	0.00135111	-0.000792263	0.00114334	-0.00100895	0.000404631	-0.00202243	-1.86734	1.73908	-0.795476	1.84498	0.587974	9.77903	102.346	9.04814e-08	2.31751e-05	M32721	poly (ADP-ribose) polymerase 1	PARP1	142	-0.00148422
208654_s_at	0.00276471	0.00741052	-0.00646018	-0.00366764	-8.74801e-05	0.000416516	-0.00368671	0.0010928	-0.000744519	0.000201595	-0.00134429	0.506338	-0.333718	-2.03642	-0.230075	1.1159	8.72999	49.451	2.2984e-06	0.000126615	BF669455	CD164 molecule, sialomucin	CD164	8763	0.00646018
208693_s_at	0.00561765	-0.00180512	-0.00410999	0.0002386	0.0055521	0.000394487	-0.000824812	0.000864872	0.000734487	0.0009143	-0.00222469	-0.712106	0.268061	-1.31406	1.56383	0.456241	11.0083	54.4068	1.51016e-06	0.000104594	D30658	glycyl-tRNA synthetase	GARS	2617	0.00410999
208758_at	0.00612406	-0.00152052	0.00047904	-0.000281065	0.00335518	-0.00193343	-0.00199073	0.00220939	-0.000204126	-0.000380389	-5.66564e-05	-1.55267	0.546732	-1.22506	1.73112	1.03306	10.2305	71.1627	4.59795e-07	5.76028e-05	D89976	5-aminoimidazole-4-carboxamide ribonucleotide formyltransferase/IMP cyclohydrolase	ATIC	471	-0.00047904
208796_s_at	0.00602899	-0.000565908	-0.00123806	-0.00461273	-0.00084951	0.00106385	-0.00100702	0.00234941	-0.000735671	-0.000121161	0.00115974	-0.930647	1.24631	-1.25651	0.759892	0.846289	11.1604	50.1009	2.17038e-06	0.000122867	BC000196	cyclin G1	CCNG1	900	0.00123806
208815_x_at	0.00600303	-0.00236617	0.000276668	-0.00337461	0.00101784	0.00265125	-0.000561909	0.00130662	-0.000424999	6.44837e-05	0.000104256	-1.26126	1.41217	-1.04911	1.09384	0.760713	9.71128	63.4781	7.63842e-07	7.50359e-05	AB023420	heat shock 70kDa protein 4	HSPA4	3308	-0.000276668
208941_s_at	0.00551431	-0.00401955	0.000489874	-0.00327675	-0.00108552	0.00415873	-0.00279081	0.000682955	0.000366857	-4.65177e-05	2.95443e-05	-1.59263	2.60459	-1.13749	1.32814	0.59733	8.09038	52.558	1.75849e-06	0.000111153	BC000941	selenophosphate synthetase 1	SEPHS1	22929	-0.000489874
209116_x_at	-0.00398237	-0.00252283	0.00896801	0.00375153	-0.000482847	-0.00171149	0.00430024	0.000375282	5.42747e-05	-0.000824016	0.000111319	-0.439412	-1.17801	4.01856	-1.18419	-1.05749	5.97071	130.02	3.07817e-08	1.49485e-05	M25079	hemoglobin, beta	HBB	3043	-0.00896801
209120_at	-0.00396713	0.00726143	0.00433028	0.000318074	-0.00256026	-0.000509637	0.00191167	-0.00219193	0.000174869	0.000105694	0.00102093	1.96492	-3.86153	2.27332	-4.89234	1.06827	8.8379	173.262	8.39281e-09	8.20899e-06	AL037401	nuclear receptor subfamily 2, group F, member 2	NR2F2	7026	-0.00433028
209189_at	-0.00159217	-0.00601694	-0.00585381	0.00922754	0.00234771	-0.00381778	0.00196392	-0.00119331	-0.000369534	-0.00153819	0.000291002	0.67141	-1.15206	0.537505	2.35017	-2.2125	6.65375	65.0334	6.86088e-07	7.10993e-05	BC004490	FBJ murine osteosarcoma viral oncogene homolog	FOS	2353	0.00585381
209198_s_at	0.00438456	0.00653697	0.00341614	-0.00147783	0.00284406	-0.00223509	0.00247724	0.00339412	0.00025858	0.000485806	-0.000259102	-0.942147	-1.24122	-0.86609	-0.050739	1.96711	5.56913	62.8622	7.97572e-07	7.68634e-05	BC004291	synaptotagmin XI	SYT11	23208	-0.00341614
209208_at	0.00434561	0.0068378	-0.00156436	0.000210158	0.00495123	-0.0022653	0.00203509	-0.000107424	-0.000500934	-0.000621489	0.000421245	-0.494802	-2.22574	-2.01895	0.61539	2.17242	7.53982	70.1112	4.91279e-07	5.99078e-05	AF059752	mannose-P-dolichol utilization defect 1	MPDU1	9526	0.00156436
209296_at	0.00495066	-0.00583554	-0.00226149	-0.0016379	-0.000504324	0.00346312	-0.00327087	0.000723117	-0.000207484	0.000380965	-0.000871259	-1.34905	2.74741	-1.31724	1.98674	-0.0130884	8.96491	71.4167	4.5256e-07	5.76028e-05	AF136972	protein phosphatase, Mg2+/Mn2+ dependent, 1B	PPM1B	5495	0.00226149
209297_at	0.00514949	-0.00424856	-0.00557613	0.000297495	0.00148308	-0.000408325	-0.00128388	0.00162752	-0.00145553	0.0018184	-0.00284112	-0.616455	0.922586	-1.22347	1.6348	0.0347125	8.69111	52.6345	1.74726e-06	0.000111079	AF114488	intersectin 1 (SH3 domain protein)	ITSN1	6453	0.00557613
209360_s_at	-0.00311933	0.00899098	0.00222248	-0.000763915	-0.000477898	0.000878818	0.000288434	-0.00145535	-0.00141995	-0.000525272	-0.000319566	0.903659	-1.64937	0.234548	-1.8343	0.712632	7.47348	56.8809	1.24119e-06	9.54504e-05	D43968	runt-related transcription factor 1	RUNX1	861	-0.00222248
209394_at	0.00236906	-0.0086227	-0.00480324	7.12065e-05	-0.002151	0.00258812	-0.00377004	-0.000347123	0.00123322	-0.000353009	0.00125059	-0.468741	2.4344	-0.640762	1.6651	-1.02562	7.94937	69.1508	5.22355e-07	6.21426e-05	BC002508	acetylserotonin O-methyltransferase-like	ASMTL	8623	0.00480324
209397_at	0.00559642	0.00337156	0.00216128	-0.00437049	0.000277086	0.000893064	0.000904424	0.00403165	-4.34344e-05	7.83141e-06	-0.00167536	-1.56768	0.627742	-1.58156	0.316512	2.2018	9.41446	53.7565	1.59231e-06	0.000106655	BC000147	malic enzyme 2, NAD(+)-dependent, mitochondrial	ME2	4200	-0.00216128
209433_s_at	0.00604041	-0.00231675	0.00144775	-0.00245068	0.00200631	0.00209602	0.000879761	0.000722582	-6.96177e-05	0.000683276	-0.00131329	-2.03691	1.61329	-1.23062	1.69307	1.19085	8.83763	64.1355	7.29734e-07	7.28294e-05	AI457120	phosphoribosyl pyrophosphate amidotransferase	PPAT	5471	-0.00144775
209434_s_at	0.0060289	-0.00166489	-0.000720077	-0.00379243	0.00177936	0.000153273	-0.00286049	0.000167022	-0.000313911	0.000812873	-0.000644842	-1.5552	1.70897	-1.80465	1.54466	1.15887	7.94782	86.4048	1.93362e-07	3.67947e-05	U00238	phosphoribosyl pyrophosphate amidotransferase	PPAT	5471	0.000720077
209440_at	0.00567614	-0.00481667	0.000714527	0.000742669	0.000791008	0.000219189	-0.000655767	0.000642787	0.000134418	-0.000185721	-0.00110289	-1.81096	1.5352	-0.784037	2.10203	0.42056	9.28265	56.162	1.31286e-06	9.77691e-05	BC001605	phosphoribosyl pyrophosphate synthetase 1	PRPS1	5631	-0.000714527
209458_x_at	-0.0039709	-0.00285314	0.00892199	0.00349401	-0.000828416	-0.00142961	0.00429141	0.000185325	-0.000589157	-9.90609e-05	0.000230902	-0.64426	-1.30337	5.61979	-1.64987	-1.5679	7.42222	173.15	8.41747e-09	8.20899e-06	AF105974	hemoglobin, alpha 1	HBA1	3039	-0.00892199
209469_at	0.00430005	0.00556765	0.00359813	-0.00674606	0.00060248	0.000793989	-0.00122506	-0.00195317	0.000297507	0.000595583	0.000551828	-1.34365	0.497206	-1.68291	-0.962509	2.94153	5.24549	73.521	3.97667e-07	5.58321e-05	BF939489	glycoprotein M6A	GPM6A	2823	-0.00359813
209567_at	0.00599964	-0.000478987	0.00402305	-0.00202598	0.000793352	-0.00199879	-0.000242816	0.0012648	-0.000335625	-0.000172478	-0.000681316	-1.99456	0.840088	-0.782375	1.08043	1.51582	8.73346	60.3148	9.57906e-07	8.40724e-05	BC001811	RRS1 ribosome biogenesis regulator homolog (S. cerevisiae)	RRS1	23212	-0.00402305
209596_at	-0.00574305	-0.0033022	-0.0025928	0.0037535	0.000233434	0.000364779	0.00137253	0.000194924	0.00023632	-0.000844263	-0.000333874	1.8972	-0.769583	1.88321	-0.365515	-2.65247	7.65547	54.0053	1.56026e-06	0.000105478	AF245505	matrix-remodelling associated 5	MXRA5	25878	0.0025928
209598_at	0.00305013	-0.00686348	-0.00525581	0.00584429	0.00385767	-0.00122737	-0.000388398	0.000243128	-0.00125762	0.000482498	-0.00049625	-1.02774	0.599536	-1.18712	4.72813	-1.53278	6.06214	141.682	2.08791e-08	1.2812e-05	AB020690	paraneoplastic antigen MA2	PNMA2	10687	0.00525581
209620_s_at	0.00604478	-0.00245341	-0.000964157	0.000860022	0.00315067	-0.00121206	0.000534294	0.00205637	0.00200402	0.0011164	0.00243314	-1.32109	0.473755	-1.10023	1.8331	0.674585	8.42573	69.0517	5.25697e-07	6.21426e-05	AB005289	ATP-binding cassette, sub-family B (MDR/TAP), member 7	ABCB7	22	0.000964157
209642_at	0.0059445	-0.00309278	-0.00163452	-0.00134029	0.00270421	0.0015426	0.000644211	-0.000236831	-0.000767743	0.000578321	0.000144315	-2.17995	1.9433	-2.16419	2.92982	1.02176	7.39247	58.1462	1.12626e-06	8.94789e-05	AF043294	budding uninhibited by benzimidazoles 1 homolog (yeast)	BUB1	699	0.00163452
209742_s_at	-0.00436471	-0.00262606	0.00820418	0.00307353	-0.00013896	-0.00218584	0.00450756	-0.000169084	-0.0014714	-0.000562108	0.000857545	-0.187827	-1.01098	3.41085	-1.0677	-1.03728	5.85769	62.7465	8.0411e-07	7.68634e-05	AF020768	myosin, light chain 2, regulatory, cardiac, slow	MYL2	4633	-0.00820418
209757_s_at	0.00119023	-0.00987828	-0.00274582	0.00270862	0.000274176	0.00229519	-0.000315428	0.000669367	-0.000499524	0.00171495	-0.000221931	-1.11965	3.39407	0.325505	3.57754	-2.61374	7.2612	174.579	8.10937e-09	8.20899e-06	BC002712	v-myc myelocytomatosis viral related oncogene, neuroblastoma derived (avian)	MYCN	4613	0.00274582
209788_s_at	0.00583978	0.00293667	-0.00100738	-0.000979558	0.00417531	-0.00238884	0.001043	0.00155027	0.000208446	0.00185366	0.000814932	-0.937637	-0.492672	-1.47707	1.04529	1.38972	6.62204	73.5183	3.97732e-07	5.58321e-05	AF183569	endoplasmic reticulum aminopeptidase 1	ERAP1	51752	0.00100738
209803_s_at	0.000298996	-0.00873384	-0.00627049	0.00310852	-0.0016854	0.00298307	-0.00222249	0.00205969	-7.54699e-05	0.00159557	0.000386633	0.0811827	2.84754	-0.432086	2.69287	-2.53756	6.88825	80.3352	2.67796e-07	4.56033e-05	AF001294	pleckstrin homology-like domain, family A, member 2	PHLDA2	7262	0.00627049
209815_at	0.00522282	-0.00513252	-0.00158027	0.00252298	0.00332604	-0.00259345	0.00110881	0.000545753	-0.00110937	7.78815e-05	2.45178e-05	-1.78445	0.75608	-1.03877	3.12674	0.140447	8.14477	71.9242	4.38519e-07	5.76028e-05	BG054916	patched 1	PTCH1	5727	0.00158027
209836_x_at	0.00607479	0.0018382	0.00194709	-0.00141601	0.00232949	-0.000629845	-0.000870905	0.00358344	0.000333393	-0.000211006	-0.00165645	-1.06866	0.121821	-0.910173	0.703255	1.166	9.45056	53.581	1.61541e-06	0.000106807	AF060511	bolA homolog 2 (E. coli)	BOLA2	552900	-0.00194709
209883_at	0.00452302	0.0062038	0.0034632	-0.00289064	0.00151874	-0.00108264	0.00103702	0.00495934	-0.000423272	0.000591935	-0.000229031	-1.62116	-1.10113	-1.60397	-0.316047	3.26821	6.5653	52.7803	1.72613e-06	0.000111035	AF288389	glycosyltransferase 25 domain containing 2	GLT25D2	23127	-0.0034632
209891_at	0.00622434	-0.00149031	-6.60716e-05	-0.000779365	0.00303035	-0.000198049	0.00075276	-3.48144e-05	-0.00208976	6.57664e-05	0.000242544	-2.23	0.971201	-1.8657	2.48481	1.49352	6.55308	71.926	4.38468e-07	5.76028e-05	AF225416	SPC25, NDC80 kinetochore complex component, homolog (S. cerevisiae)	SPC25	57405	6.60716e-05
209904_at	-0.00299517	-0.00429813	0.00884488	0.0054061	-5.88928e-05	-0.0010462	0.00481564	0.000599302	0.00125238	-0.00202132	-3.99567e-05	-0.608703	-0.601388	2.66239	-0.195612	-0.835351	5.7477	102.158	9.12354e-08	2.31751e-05	AF020769	troponin C type 1 (slow)	TNNC1	7134	-0.00884488
209913_x_at	0.00378614	-0.00816169	-0.00246108	0.000957711	0.000334836	0.000875559	-0.000920467	0.00211083	-0.00230712	-0.000688881	-0.000132393	-1.25256	2.21026	-0.604776	2.43733	-0.705896	6.0312	138.658	2.30181e-08	1.29597e-05	AB007875	KIAA0415	KIAA0415	9907	0.00246108
209916_at	0.00601356	-0.00252702	0.00138994	-0.000696635	0.00323252	-0.00056358	-0.000293096	0.00276888	-0.000189133	0.00135984	-0.00027881	-1.88191	0.911821	-1.04766	1.89196	1.0151	7.69079	165.524	1.03247e-08	8.95019e-06	BC002477	dehydrogenase E1 and transketolase domain containing 1	DHTKD1	55526	-0.00138994
210005_at	0.00613075	-0.00141293	0.00263188	-0.00144414	0.00221571	0.000625687	-0.000236443	0.000205885	-0.00213911	-6.68825e-05	5.75166e-05	-2.29526	1.1942	-1.17506	1.72749	1.5289	6.63842	71.8833	4.39629e-07	5.76028e-05	D32051	phosphoribosylglycinamide formyltransferase, phosphoribosylglycinamide synthetase, phosphoribosylaminoimidazole synthetase	GART	2618	-0.00263188
210102_at	0.00594198	0.000923997	-0.00154278	-0.00227612	0.00515962	-0.00160623	-0.000739795	-0.000110864	0.000736833	-0.000163526	-0.00109182	-0.946799	0.082709	-1.47438	1.19436	1.10591	7.43409	53.7681	1.59081e-06	0.000106655	BC001234	von Willebrand factor A domain containing 5A	VWA5A	4013	0.00154278
210153_s_at	0.0049339	0.00574078	-0.000548197	-0.00403235	0.00237839	-0.000982657	0.00112595	0.00333985	0.000229386	0.000417999	-3.39442e-05	-0.768541	-0.478117	-1.86326	0.205162	2.03331	8.89539	56.2176	1.30714e-06	9.77691e-05	M55905	malic enzyme 2, NAD(+)-dependent, mitochondrial	ME2	4200	0.000548197
210154_at	0.00541298	0.00515037	0.000565855	-0.00236335	0.00182393	-8.81056e-05	-0.000377208	0.00280838	9.00235e-06	-0.000269765	-0.000367185	-1.39788	-0.511527	-2.37043	0.521467	2.80104	7.21586	75.1657	3.6033e-07	5.28998e-05	M55905	malic enzyme 2, NAD(+)-dependent, mitochondrial	ME2	4200	-0.000565855
210198_s_at	0.00599573	-0.00153422	0.00287425	-0.00336211	0.00142309	0.000724167	0.0004847	0.00151611	-3.06232e-05	0.000188062	5.48299e-05	-3.13425	2.26435	-1.56075	1.93455	2.13026	7.21752	234.61	2.11695e-09	4.63466e-06	BC002665	proteolipid protein 1	PLP1	5354	-0.00287425
210265_x_at	0.00361379	-0.00719815	-0.00540664	0.00248667	0.00181869	0.00105099	0.000924441	0.00274103	0.000514782	0.000324809	-0.000394943	-1.38297	2.44198	-1.6946	4.56882	-1.34717	7.55968	101.851	9.24769e-08	2.33817e-05	AF268617	POU class 5 homeobox 1 pseudogene 3	POU5F1P3	642559	0.00540664
210367_s_at	-0.00540322	0.000307796	-0.00685061	0.0011375	-0.00154224	-0.000621054	-0.000487591	-0.00257075	-0.000429785	-0.001566	-0.000116646	2.76568	-0.795064	0.18375	-0.976877	-1.97191	7.76764	87.6351	1.81504e-07	3.53734e-05	AF010316	prostaglandin E synthase	PTGES	9536	0.00685061
210495_x_at	-0.00524527	-0.00372578	-0.0051641	-0.000188954	-0.00266306	0.00151594	-0.000527796	-0.0039427	-5.6845e-05	-0.000346598	0.000614942	2.18546	1.07253	0.852418	-0.685397	-2.65432	11.3413	59.1671	1.04287e-06	8.6953e-05	AF130095	fibronectin 1	FN1	2335	0.0051641
210508_s_at	0.00269504	-0.008478	-0.00533213	0.00169981	0.000688328	0.00109065	-0.000389019	0.00108863	-0.00104638	-0.000651519	0.000275312	-0.723833	2.17048	-0.820132	2.75247	-1.28788	6.26364	163.238	1.09963e-08	9.0991e-06	D82346	potassium voltage-gated channel, KQT-like subfamily, member 2	KCNQ2	3785	0.00533213
210559_s_at	0.00621019	2.76518e-05	-0.00103682	-0.000309827	0.00382315	0.000552114	0.00153664	0.000134976	-0.000531815	-0.000494011	0.0011459	-1.97525	0.30891	-2.24611	2.43767	1.74458	8.09226	52.0697	1.83219e-06	0.000113448	D88357	cyclin-dependent kinase 1	CDK1	983	0.00103682
210568_s_at	0.00591297	-0.00149463	-0.00298435	-0.000931654	0.00463333	0.000748186	-0.000265294	0.000872969	0.000840234	0.000643492	0.000718535	-1.10873	0.594373	-1.68691	1.8589	0.795943	7.06515	71.2	4.58722e-07	5.76028e-05	BC001052	RecQ protein-like (DNA helicase Q1-like)	RECQL	5965	0.00298435
210674_s_at	0.00285366	-0.00824161	-0.00469076	0.00108688	-0.00176191	0.00315833	-0.00345014	0.000118149	-6.35386e-05	-0.000223054	-0.00040251	-0.651634	2.60714	-0.812644	2.09056	-1.06936	4.92178	58.9193	1.0624e-06	8.80813e-05	AF152308	protocadherin alpha 1	PCDHA1	56134	0.00469076
210697_at	0.002657	-0.00552031	-0.00523118	0.0072421	0.00666537	-0.0022161	0.00171061	0.00265051	-0.00140237	0.00115006	0.000561106	-0.527869	-0.735384	-0.630219	3.01605	-0.817555	4.13206	141.781	2.08132e-08	1.2812e-05	AF070651	zinc finger protein 257	ZNF257	113835	0.00523118
210762_s_at	-0.00532188	-0.00311044	-0.00343021	0.00467732	-0.00126779	-0.000846504	0.0021544	-0.00532226	0.000305965	0.00190947	0.000921462	1.66663	-0.736293	1.41911	-0.199792	-2.23408	7.56764	50.4783	2.10001e-06	0.000121064	AF026219	deleted in liver cancer 1	DLC1	10395	0.00343021
210845_s_at	-0.0044522	-0.00137665	-0.00809403	0.00445008	-0.00229675	-0.00156526	-0.0017872	-0.00360165	-0.000270215	-0.000580677	-0.000207353	1.96333	-0.580059	0.0074875	0.0456275	-1.80539	7.0732	50.5412	2.08856e-06	0.000120708	U08839	plasminogen activator, urokinase receptor	PLAUR	5329	0.00809403
210852_s_at	0.0045782	-0.00415197	0.00303712	-0.006502	-0.0032062	0.00463107	-0.00202747	0.00184808	0.000141981	0.000956529	-0.000646079	-2.23131	4.36351	-0.819914	0.691426	0.862465	7.22191	160.592	1.18416e-08	9.30287e-06	AF229180	aminoadipate-semialdehyde synthase	AASS	10157	-0.00303712
210868_s_at	0.00585043	0.000401909	0.0017287	-0.00569206	0.000287107	0.000328748	0.000273735	0.00297965	-0.00079241	0.000750547	-0.000322859	-1.98453	1.78742	-1.70094	0.85567	1.95224	6.84967	100.393	9.86642e-08	2.44925e-05	BC001305	ELOVL family member 6, elongation of long chain fatty acids (FEN1/Elo2, SUR4/Elo3-like, yeast)	ELOVL6	79071	-0.0017287
210905_x_at	0.00366238	-0.00775681	-0.00423588	0.00125745	0.00211828	0.00045822	-0.000207298	0.00254606	-0.000922715	7.93374e-05	0.000254493	-1.4837	2.59222	-1.30354	3.89777	-1.10987	7.42008	250.768	1.56317e-09	4.63466e-06	AF268613	POU class 5 homeobox 1 pseudogene 4	POU5F1P4	645682	0.00423588
210950_s_at	0.00563672	0.000423829	-0.00499528	0.00140912	0.00419902	0.000179404	-0.000339805	0.00327091	-0.000251414	-4.06225e-05	0.00083753	-0.883695	-0.175896	-2.38525	2.2967	1.00136	10.0792	63.0813	7.85368e-07	7.61835e-05	BC003573	farnesyl-diphosphate farnesyltransferase 1	FDFT1	2222	0.00499528
210964_s_at	0.00176072	-0.00767218	-0.00788382	0.00261316	0.000880455	0.000986881	-0.00190307	0.00211842	0.000419648	-0.00106514	0.000794053	-0.0564169	1.40493	-0.904105	2.14957	-1.2422	5.97179	108.234	7.03596e-08	2.07705e-05	U94364	glycogenin 2	GYG2	8908	0.00788382
211343_s_at	-0.000853506	-0.00868935	-0.00626401	0.00295016	-0.00342051	0.000738286	-0.00119701	-0.00180242	-0.000451456	-0.000122295	-0.000254291	0.413132	2.213	0.0327796	1.78525	-2.36282	6.55057	60.9118	9.17055e-07	8.18352e-05	M33653	collagen, type XIII, alpha 1	COL13A1	1305	0.00626401
211538_s_at	-0.00319674	-0.00578414	-0.00759931	-0.000693101	-0.00462477	0.00226977	-0.00224876	-0.00400449	0.000815854	0.000948234	-0.000159109	2.07773	3.10445	-0.209868	0.377091	-3.22402	7.96378	85.4862	2.02835e-07	3.76783e-05	U56725	heat shock 70kDa protein 2	HSPA2	3306	0.00759931
211696_x_at	-0.00385648	-0.002532	0.00920494	0.00354705	-0.0020688	-0.00127276	0.00394544	-0.000226624	-0.00132708	-0.00142001	0.000141957	-0.369083	-0.593281	3.07031	-1.03749	-0.788368	6.7846	139.966	2.20617e-08	1.29597e-05	AF349114	hemoglobin, beta	HBB	3043	-0.00920494
211698_at	-0.00209891	0.00609786	0.0053571	-0.00584338	-0.00782607	0.00359659	-0.00186652	-0.00168624	0.000934916	-0.000147331	0.000543449	0.824718	1.31938	1.02794	-5.60966	1.78997	8.55304	63.214	7.7809e-07	7.58941e-05	AF349444	EP300 interacting inhibitor of differentiation 1	EID1	23741	-0.0053571
211699_x_at	-0.00406258	-0.00273596	0.00886874	0.00331796	-0.000502866	-0.00185413	0.00404868	0.00029905	-0.000362812	-0.000822379	-0.000368237	-0.501883	-1.23593	4.83279	-1.45784	-1.33611	7.39814	105.397	7.92908e-08	2.1478e-05	AF349571	hemoglobin, alpha 1	HBA1	3039	-0.00886874
211719_x_at	-0.0051644	-0.00409521	-0.00489198	0.000221308	-0.00257711	0.00155396	-0.000569714	-0.00466174	-0.000320037	0.000461631	-0.000353752	2.23895	1.16617	1.01877	-0.612484	-2.89853	11.2735	55.7446	1.35678e-06	9.93272e-05	BC005858	fibronectin 1	FN1	2335	0.00489198
211724_x_at	0.00586674	-0.00398545	-0.000960112	0.000253675	0.00164904	-0.00108051	-0.000563467	0.00117327	0.000390515	0.000408175	0.0021964	-1.13878	0.879777	-0.844919	1.55329	0.373268	8.02288	53.2501	1.66009e-06	0.000109232	BC005883	missing oocyte, meiosis regulator, homolog (Drosophila)	MIOS	54468	0.000960112
211745_x_at	-0.00391702	-0.00257418	0.00903029	0.00360492	-0.00129087	-0.00229161	0.00414473	-0.000545885	-2.55364e-05	-0.000494028	0.000333076	-0.636277	-1.45117	5.65158	-1.75317	-1.47894	7.17636	186.571	5.99858e-09	7.28002e-06	BC005931	hemoglobin, alpha 1	HBA1	3039	-0.00903029
211752_s_at	0.00528266	0.00331621	-0.00439216	-0.00103039	0.00533297	-0.00192149	-0.00122807	-0.000187333	0.00067904	-0.000338827	0.00112799	-0.376352	-0.48213	-1.63372	0.952204	0.991409	9.25006	64.8137	6.96465e-07	7.19018e-05	BC005954	NADH dehydrogenase (ubiquinone) Fe-S protein 7, 20kDa (NADH-coenzyme Q reductase)	NDUFS7	374291	0.00439216
211781_x_at	0.00168928	-0.0090338	-0.00353863	-0.00206586	-0.00134744	0.00482261	-0.00364378	0.00238258	-0.000707617	-0.000158513	-0.000758448	-0.698837	3.80802	-0.581065	1.8708	-1.43032	6.48133	63.2117	7.78216e-07	7.58941e-05	BC006164	---	---		0.00353863
211833_s_at	0.00554624	0.00455414	0.00162842	-0.00226658	0.00159335	0.00103142	-0.00211	0.00220552	0.000333358	0.00083212	-0.000389941	-1.51849	-0.0648097	-2.07086	0.458386	2.61508	7.90762	49.961	2.19719e-06	0.000123408	U19599	BCL2-associated X protein	BAX	581	-0.00162842
211959_at	-0.0056622	0.00352926	-0.00124659	0.00426372	-0.00147952	0.00100158	0.00197941	-0.00195652	-0.000242747	0.000293612	-0.000272591	3.33239	-3.64936	2.07397	-2.77318	-1.6498	9.40406	77.1249	3.21267e-07	4.97036e-05	AW007532	insulin-like growth factor binding protein 5	IGFBP5	3488	0.00124659
212247_at	0.00588723	-0.00341374	-0.00234268	-0.000675661	0.00237637	-0.000304197	0.000683342	5.08839e-05	-0.000136617	0.000635433	0.00194242	-1.29127	1.07685	-1.3574	1.97307	0.521875	8.97745	57.0038	1.22942e-06	9.51816e-05	AW008531	nucleoporin 205kDa	NUP205	23165	0.00234268
212342_at	0.00580473	0.00138959	-0.0036785	0.000238928	0.00393062	-0.000866509	-0.0017355	0.00391567	0.000164263	-0.000379178	0.000285781	-0.712073	-0.115937	-1.68649	1.37671	0.957239	6.82454	61.005	9.10867e-07	8.14371e-05	BG500611	Yip1 domain family, member 6	YIPF6	286451	0.0036785
212464_s_at	-0.0050562	-0.00397787	-0.00547482	0.000159466	-0.00315721	0.00146635	-0.000931752	-0.00399016	-8.97419e-05	0.00053662	-0.000709985	2.339	1.30382	0.828485	-0.59792	-2.92731	10.9783	85.2606	2.05247e-07	3.78688e-05	X02761	fibronectin 1	FN1	2335	0.00547482
212482_at	0.00608883	0.00108223	0.00110806	-0.00248543	0.00305793	-0.00162078	-0.000484726	0.00307642	-0.000456656	0.000411777	7.62473e-05	-1.36022	0.301102	-1.28185	1.04936	1.41484	8.64212	116.923	4.96938e-08	1.84097e-05	BF671894	required for meiotic nuclear division 5 homolog A (S. cerevisiae)	RMND5A	64795	-0.00110806
212488_at	-0.00526979	-0.00209255	-0.00581523	0.00244634	-0.00360883	0.00242451	0.000321713	-0.00195856	0.000727731	0.00265552	-0.00125337	2.68957	0.234588	0.836907	-0.786297	-2.80151	8.21026	83.0601	2.3071e-07	4.09633e-05	N30339	collagen, type V, alpha 1	COL5A1	1289	0.00581523
212489_at	-0.00575529	-0.00207559	-0.00289398	0.00309139	-0.00292177	0.00350371	0.00144595	-0.00102224	0.000895778	6.96092e-05	-0.000771428	2.18188	-0.128752	1.68373	-1.08217	-2.54	6.96809	53.1735	1.67065e-06	0.000109399	AI983428	collagen, type V, alpha 1	COL5A1	1289	0.00289398
212554_at	0.00566637	0.000694539	0.00485503	-3.45451e-05	0.00300631	-0.00184425	0.00231328	0.00424713	-0.000800556	0.000104668	0.000238132	-2.60667	-0.278873	-0.640386	1.48483	2.13666	7.46644	130.39	3.03884e-08	1.49485e-05	N90755	CAP, adenylate cyclase-associated protein, 2 (yeast)	CAP2	10486	-0.00485503
212565_at	0.00526905	0.0042224	0.00274703	-0.00157917	0.00466225	-0.000959836	-0.00246468	0.00351304	-0.00123585	0.000233985	-6.10605e-05	-1.5895	-0.801868	-1.61319	0.700678	2.46514	8.36618	52.4015	1.7817e-06	0.000111205	BE302191	serine/threonine kinase 38 like	STK38L	23012	-0.00274703
212582_at	0.0056704	0.00167084	0.0013422	-0.00632768	0.00155924	0.000990397	0.000567217	0.0014564	0.00121376	0.00187831	-0.00229339	-1.17354	0.935958	-1.27916	0.407913	1.44239	9.72617	51.3587	1.94637e-06	0.000117708	AL049923	oxysterol binding protein-like 8	OSBPL8	114882	-0.0013422
212589_at	0.00510075	-0.00540567	0.00123835	-0.00345819	-0.00069113	0.00278932	0.000326607	0.00372424	-0.000731992	0.000189952	0.00238822	-1.49435	2.17111	-0.588155	1.25399	0.326755	9.62446	72.2503	4.29776e-07	5.74039e-05	AI753792	related RAS viral (r-ras) oncogene homolog 2	RRAS2	22800	-0.00123835
212590_at	0.00615312	-0.00111065	-0.000975914	-0.00353067	-7.95406e-05	-0.000576296	-0.00101972	0.00227254	-0.000233895	-0.000529215	0.000995491	-1.63136	1.72153	-1.89862	1.5361	1.2992	8.49385	71.4519	4.51569e-07	5.76028e-05	AI431643	related RAS viral (r-ras) oncogene homolog 2	RRAS2	22800	0.000975914
212599_at	0.0061055	-0.00269632	0.00125444	-0.00151951	0.000984398	0.000715955	0.00115104	0.00121949	-0.000190624	0.000856082	-0.000961433	-2.19114	1.65028	-1.2205	1.96316	1.14594	8.59282	78.2682	3.00849e-07	4.80886e-05	AK025298	autism susceptibility candidate 2	AUTS2	26053	-0.00125444
212614_at	-0.00239238	0.00957823	0.000870017	-0.00208819	-0.000989811	-0.00188213	-8.4206e-05	-0.000326377	0.0017546	7.56505e-05	-0.000304847	1.38232	-2.43122	-0.223564	-2.65693	1.34841	8.51733	113.466	5.68882e-08	1.90603e-05	BG285011	AT rich interactive domain 5B (MRF1-like)	ARID5B	84159	-0.000870017
212799_at	0.00572621	-0.00215408	-0.00493358	-0.000334279	0.00179818	0.000953317	-0.00143468	0.00201948	-0.000623357	0.000104159	-0.00252676	-0.666274	0.778469	-1.41679	1.45546	0.381007	8.40394	53.6301	1.60891e-06	0.000106655	BE217875	syntaxin 6	STX6	10228	0.00493358
212816_s_at	0.00588451	-0.00126701	-0.00172219	-0.00400262	0.0037086	0.000864778	-0.00137587	0.00214411	-0.000435996	0.000711231	-0.000357573	-1.98961	1.89797	-2.75076	2.33405	1.63476	7.69891	106.892	7.44233e-08	2.1392e-05	BE613178	cystathionine-beta-synthase	CBS	875	0.00172219
212819_at	0.00579287	0.00209512	-0.00235728	0.000584174	0.00497953	-0.00253618	-0.00139814	0.00137418	-0.00133397	0.00129489	-0.000313018	-0.621582	-0.408563	-1.21663	1.03548	0.878534	5.14368	54.2491	1.5296e-06	0.000104791	AF055024	ankyrin repeat and SOCS box-containing 1	ASB1	51665	0.00235728
212942_s_at	-0.00545135	0.00102983	-0.00547655	-0.000120704	-0.00358623	0.0031617	-0.00180986	-0.00348568	0.00105534	0.000401877	0.00057496	2.75203	0.0442433	0.246758	-1.75703	-1.75994	5.86303	138.884	2.28494e-08	1.29597e-05	AB033025	KIAA1199	KIAA1199	57214	0.00547655
212943_at	0.00549716	-0.00469077	0.00130688	0.00222914	0.00189308	-0.00120843	0.00246304	0.00208202	-0.000527085	0.00102958	-0.000186864	-1.76685	0.758251	-0.426031	2.1219	0.383525	9.35137	61.8001	8.60115e-07	7.8947e-05	AB011100	KIAA0528	KIAA0528	9847	-0.00130688
212976_at	0.0060994	0.000219303	0.000896214	-0.00284358	0.00304537	0.00145559	-0.000424772	0.00309674	-0.00194235	-0.000701079	-0.000755683	-1.33124	0.694268	-1.23966	1.04549	1.22926	5.8193	71.9812	4.36975e-07	5.76028e-05	R41498	leucine rich repeat containing 8 family, member B	LRRC8B	23507	-0.000896214
212996_s_at	0.0059359	-0.000859194	0.00397491	-0.00265225	0.00165933	-0.000462596	0.000631973	0.00224325	0.000865597	0.000375145	-0.000570863	-1.68661	0.822847	-0.644483	0.925008	1.22531	6.80531	118.085	4.75279e-08	1.80253e-05	AI803485	URB1 ribosome biogenesis 1 homolog (S. cerevisiae)	URB1	9875	-0.00397491
213007_at	0.00599683	-0.00153443	-0.000357754	-0.00243519	0.00470497	0.000629513	0.000827399	0.000627877	-0.000857072	0.000789488	0.00101791	-1.92843	1.00984	-1.81378	2.14992	1.36772	8.27513	56.0137	1.32826e-06	9.83864e-05	W74442	Fanconi anemia, complementation group I	FANCI	55215	0.000357754
213012_at	0.00294027	0.00868055	0.00325966	-0.00316637	0.000617497	-0.00167347	0.000637244	0.0013703	0.000176933	0.000667882	-2.10943e-05	-0.761162	-2.107	-1.55593	-1.64177	3.59529	7.46016	110.885	6.31006e-08	2.00355e-05	D42055	neural precursor cell expressed, developmentally down-regulated 4	NEDD4	4734	-0.00325966
213050_at	0.00176737	-0.00933846	-0.00475924	0.000655847	-0.00103454	0.000288371	-0.0014806	0.00125788	-0.000412521	-0.00180122	-0.000738299	-0.645582	2.91039	-0.508772	2.57939	-1.70496	6.7239	104.04	8.40476e-08	2.2282e-05	AA594937	cordon-bleu homolog (mouse)	COBL	23242	0.00475924
213106_at	0.00457923	0.0020991	0.00778846	-0.00464087	0.00214621	0.000591475	-0.000123835	0.0020632	-0.000297318	0.000447408	0.000354698	-1.71426	0.469404	-0.194622	-0.127329	1.77242	7.6599	70.473	4.80156e-07	5.90602e-05	AI769688	ATPase, aminophospholipid transporter (APLT), class I, type 8A, member 1	ATP8A1	10396	-0.00778846
213131_at	0.00236815	-0.00868244	-0.00536661	0.00197887	-0.000420001	0.00166859	1.94022e-05	0.00117085	-2.83177e-05	-0.000555962	0.000225363	-0.797445	2.86596	-0.846669	3.26976	-1.77327	6.30668	130.249	3.05381e-08	1.49485e-05	R38389	olfactomedin 1	OLFM1	10439	0.00536661
213135_at	0.000888813	-0.00958215	-0.0044818	0.00286645	-0.00150912	-0.000594319	-0.000428712	0.00091566	-1.73775e-05	-0.00111974	0.000709005	-0.441192	2.25065	0.0167229	2.47719	-1.97164	7.18475	75.778	3.47529e-07	5.1575e-05	U90902	T-cell lymphoma invasion and metastasis 1	TIAM1	7074	0.0044818
213225_at	0.00466031	-0.00619208	-0.0029446	-0.00263319	-0.000740541	0.00266475	-0.00343686	1.4131e-05	-0.00199983	3.73592e-05	0.000105055	-1.14029	2.76169	-1.29585	1.81229	-0.124565	8.40313	87.868	1.79359e-07	3.53348e-05	AJ271832	protein phosphatase, Mg2+/Mn2+ dependent, 1B	PPM1B	5495	0.0029446
213274_s_at	-0.00508488	0.00380531	-0.00468671	-0.00242791	-0.00489084	0.00194825	-0.000482428	-0.000860912	0.000546043	-0.00111215	0.000546361	2.07099	-0.161286	-0.0391378	-1.94436	-0.69489	7.33077	54.2718	1.52679e-06	0.000104791	AA020826	cathepsin B	CTSB	1508	0.00468671
213289_at	0.00604807	0.00204565	-0.00116681	0.000795291	0.00346029	-0.00240736	0.00132913	0.00117856	1.2029e-05	0.00025505	-0.000272713	-1.27275	-0.619266	-1.74092	1.62944	1.55349	6.53988	51.9792	1.84627e-06	0.000114119	BE221922	apolipoprotein O-like	APOOL	139322	0.00116681
213302_at	0.00569853	7.50733e-05	0.00529331	-0.00304408	-0.000483778	0.00215026	0.000588375	0.00109648	-0.000395312	0.000177531	0.000381073	-2.78312	1.77757	-0.824935	0.76459	2.23082	8.19102	64.1146	7.30788e-07	7.28294e-05	AL044326	phosphoribosylformylglycinamidine synthase	PFAS	5198	-0.00529331
213326_at	0.00430605	-0.00736507	-0.00212783	0.00153188	0.00153739	0.00107456	0.00188861	0.0022076	-0.000338221	0.000495263	0.00109217	-1.52252	1.83923	-0.670788	2.77394	-0.492659	7.22582	87.4207	1.83505e-07	3.54912e-05	AU150319	vesicle-associated membrane protein 1 (synaptobrevin 1)	VAMP1	6843	0.00212783
213350_at	-0.00569608	-0.000943304	0.00271477	-0.00130817	-0.00622679	0.00241398	-0.0012023	-0.00138313	0.000480117	0.000145913	0.00280256	0.720514	0.545156	1.19858	-1.35748	-0.796299	8.89246	72.6094	4.20392e-07	5.69699e-05	BF680255	Ribosomal protein S11	RPS11	6205	-0.00271477
213365_at	0.00590821	0.00180075	0.00287487	-0.00384035	0.000909612	0.00169384	-0.000626884	0.00150352	-0.000612004	0.000459567	-0.00061254	-1.33938	0.749445	-1.0563	0.46001	1.48709	7.38873	71.709	4.44408e-07	5.76028e-05	N64622	ERI1 exoribonuclease family member 2	ERI2	112479	-0.00287487
213416_at	0.00324677	0.00725903	0.00465629	-0.00419365	0.00306371	-0.00154027	0.000324083	0.00468385	0.00119256	0.000127389	-0.000314413	-1.01994	-1.30574	-0.946027	-0.905289	2.6894	6.34976	51.47	1.92795e-06	0.000117512	BG532690	integrin, alpha 4 (antigen CD49D, alpha 4 subunit of VLA-4 receptor)	ITGA4	3676	-0.00465629
213429_at	-0.0010807	0.0102222	3.2132e-05	-0.00232012	0.000477134	-0.00125923	0.000723266	-0.00169704	-0.000609063	0.000888389	0.000190212	1.31614	-2.90803	-0.915772	-2.53734	1.95528	7.16207	163.515	1.09122e-08	9.0991e-06	AW025579	bicaudal C homolog 1 (Drosophila)	BICC1	80114	-3.2132e-05
213447_at	0.00524006	-0.00428729	-0.00161047	-0.00438628	-0.000607408	0.0032087	-0.0022458	0.0042941	-7.06395e-05	0.00128716	0.00195961	-1.40705	2.75267	-1.48117	1.51822	0.464798	8.45865	84.9018	2.09156e-07	3.81097e-05	AI672541	imprinted in Prader-Willi syndrome (non-protein coding)	IPW	3653	0.00161047
213501_at	0.00540505	0.00418405	-0.00195692	-0.0042531	0.00268763	0.0012415	-0.000667948	0.00166965	0.00126865	0.00139357	-0.00106083	-0.556431	0.13008	-1.55222	0.401542	1.28019	6.11576	55.4872	1.38477e-06	0.000100167	T62985	acyl-CoA oxidase 1, palmitoyl	ACOX1	51	0.00195692
213515_x_at	-0.00341377	-0.00249327	0.00920765	0.00516711	-0.00300192	-3.09272e-05	0.00456142	-0.000319611	0.000154299	-0.00102337	0.000140006	-1.17183	-1.61096	7.76371	-2.2356	-1.97658	6.57007	102.954	8.81067e-08	2.30404e-05	AI133353	hemoglobin, gamma A	HBG1	3047	-0.00920765
213523_at	0.0056024	-0.00430131	0.00117186	-0.00264632	0.000399542	-0.00101178	-0.00180978	0.00369979	-0.000152047	0.000859006	0.000274167	-1.25458	1.35959	-0.646202	1.15687	0.460941	8.46798	49.5046	2.28751e-06	0.000126445	AI671049	cyclin E1	CCNE1	898	-0.00117186
213547_at	0.00368034	-0.00570531	0.00752528	0.000891004	0.00184934	-6.33217e-05	0.00415615	0.00231808	-0.000131259	-5.64167e-05	0.00204084	-1.4651	0.647515	0.688693	0.879057	0.204099	8.27867	65.8686	6.48316e-07	6.92886e-05	AB014567	cullin-associated and neddylation-dissociated 2 (putative)	CAND2	23066	-0.00752528
213562_s_at	0.00594061	0.0014677	-0.000526394	0.00160171	0.00423594	-0.00304386	0.0009117	0.00331527	0.001318	-0.00158898	-0.000967181	-1.28302	-0.714255	-1.41064	1.65876	1.35568	5.47049	59.5779	1.01144e-06	8.57749e-05	BF979497	squalene epoxidase	SQLE	6713	0.000526394
213581_at	0.00606612	0.00140521	0.00245941	-0.00327885	0.00101767	0.000842334	-0.000563952	0.00150113	-0.000166666	0.000456682	0.000509391	-1.81356	0.928854	-1.44674	0.839303	1.9089	7.67618	107.873	7.14265e-08	2.09721e-05	BF446180	programmed cell death 2	PDCD2	5134	-0.00245941
213623_at	0.00506214	0.00459642	-0.000575132	-0.00643165	9.7794e-05	-0.000888906	-0.00145267	0.00104373	0.00274425	0.00121404	0.000544774	-0.630684	0.47281	-1.57001	-0.00997682	1.52641	6.42561	51.2135	1.97074e-06	0.000118256	NM_007054	kinesin family member 3A	KIF3A	11127	0.000575132
213661_at	-0.00525379	-0.00195977	-0.00540644	0.00113394	-0.00555105	0.00239954	-0.0011469	-4.50033e-06	0.00126893	-0.00126074	-0.00014799	2.20755	0.813221	0.64777	-1.01189	-2.23588	7.42921	60.6963	9.31553e-07	8.26977e-05	AI671186	peptidase domain containing associated with muscle regeneration 1	PAMR1	25891	0.00540644
213721_at	0.00473517	-0.00644862	-0.00315346	0.00112972	0.00169016	0.000672758	-0.00154561	0.00144206	0.0010069	-0.00104308	0.000107898	-1.52183	2.10619	-1.34669	3.0665	-0.326777	7.03161	142.02	2.06551e-08	1.2812e-05	L07335	SRY (sex determining region Y)-box 2	SOX2	6657	0.00315346
213782_s_at	-0.00431361	-0.00249054	0.0084078	0.00387695	-0.000883294	0.000514287	0.00356196	-0.000682035	-0.00176705	-0.00128305	0.000553527	-0.223681	-1.02484	4.42604	-1.50834	-1.37984	5.09397	92.8672	1.39973e-07	2.95979e-05	BF939176	myozenin 2	MYOZ2	51778	-0.0084078
213844_at	-0.0054944	0.00383694	-0.00028686	0.00320229	-0.00360308	-0.000699139	0.001402	-0.00488883	0.000557361	0.000225185	-0.000265439	2.80861	-2.74334	1.9403	-2.97857	-1.20198	7.46888	54.5141	1.49711e-06	0.000104552	NM_019102	homeobox A5	HOXA5	3202	0.00028686
213900_at	0.00178909	-0.00890279	-0.00458116	0.00396487	0.00225808	-0.00019864	0.000191162	0.00203906	0.00041159	-0.00265206	-0.000598951	-0.455012	0.968238	-0.18278	2.04219	-1.10734	5.94366	80.9747	2.58476e-07	4.45241e-05	AA524029	family with sequence similarity 189, member A2	FAM189A2	9413	0.00458116
213906_at	0.00617929	-0.00112369	0.000993002	-0.00243522	0.00252954	3.48451e-05	-0.00174716	0.000971109	-0.000660788	0.000670507	0.000684337	-2.12908	1.3896	-1.75173	1.84756	1.60199	5.64778	133.949	2.69084e-08	1.38829e-05	AW592266	v-myb myeloblastosis viral oncogene homolog (avian)-like 1	MYBL1	4603	-0.000993002
213924_at	0.00292664	-0.00845542	-0.00442792	0.00232497	0.0016569	0.00156605	0.000829484	0.000311001	-0.000583244	0.00115327	-0.000780961	-0.827737	1.72805	-0.588891	2.58626	-1.07986	6.95569	83.2779	2.28025e-07	4.06965e-05	BF476502	guanine nucleotide binding protein (G protein), alpha activating activity polypeptide, olfactory type	GNAL	2774	0.00442792
213947_s_at	0.00581177	-0.000873048	0.0027618	-0.00259191	0.00428049	-0.00196988	0.000492784	0.00394182	0.000778735	0.0012152	0.000822116	-1.88047	0.52448	-0.96301	1.40774	1.40915	8.15341	66.0231	6.4161e-07	6.87063e-05	AI867102	nucleoporin 210kDa	NUP210	23225	-0.0027618
214016_s_at	0.0016539	-0.00893356	0.00487857	0.00369188	-0.00134005	0.00147869	0.00258838	0.000438807	-0.00102494	0.000778115	0.00145809	-1.45573	1.48095	1.31897	1.38059	-0.837622	10.0393	67.6554	5.75661e-07	6.51099e-05	AL558875	hypothetical LOC100506168	LOC100506168	100506168	-0.00487857
214023_x_at	-0.000169312	-0.0103599	-0.00201349	0.00070575	-0.000851227	0.00116046	-0.00015831	0.001638	-0.000504494	-0.00111438	0.000746117	-0.876936	4.26528	1.07225	2.95573	-3.23015	8.56065	90.8826	1.54205e-07	3.1424e-05	AL533838	tubulin, beta 2B	TUBB2B	347733	0.00201349
214046_at	0.00535635	0.00369369	0.00238915	-0.0048402	0.00375279	0.000155552	-0.00112827	-0.000803905	0.000221879	0.00035658	0.000709954	-1.58219	0.180842	-1.80786	0.363808	2.48461	5.67703	59.8077	9.94364e-07	8.5262e-05	AA017721	fucosyltransferase 9 (alpha (1,3) fucosyltransferase)	FUT9	10690	-0.00238915
214061_at	0.00580906	-0.00334396	0.000782441	-0.00290527	0.00258578	0.00235503	-0.000283289	0.00101148	-0.000321921	0.0014075	-0.00100962	-1.58305	1.56351	-1.03883	1.48998	0.76111	6.4189	58.638	1.08511e-06	8.88706e-05	AI017564	WD repeat domain 67	WDR67	93594	-0.000782441
214071_at	0.00413953	-0.00701644	-0.00408881	0.00209321	0.00277451	-0.00010877	0.00069414	-0.000721927	0.000644099	0.00181897	0.000640755	-1.0929	1.36528	-0.98094	2.80692	-0.579518	4.91033	59.9666	9.82767e-07	8.47896e-05	AI082827	guanine nucleotide binding protein (G protein), alpha activating activity polypeptide, olfactory type	GNAL	2774	0.00408881
214155_s_at	0.00617082	-0.000913964	0.00195737	-0.00254355	0.000102949	0.00194085	-0.00105666	0.00137731	-0.00192985	0.000305131	8.14939e-05	-2.13699	1.7881	-1.46261	1.38723	1.59121	5.90417	62.3864	8.24882e-07	7.79297e-05	AI743740	La ribonucleoprotein domain family, member 4	LARP4	113251	-0.00195737
214203_s_at	0.00130012	-0.00886872	-0.00528973	-0.00245461	-0.00269528	0.00148789	-0.00394586	0.0017813	-0.000881427	-0.000740715	3.78396e-05	-0.266674	2.95954	-0.63883	1.4574	-1.26556	7.75738	63.1273	7.82835e-07	7.60729e-05	AA074145	proline dehydrogenase (oxidase) 1	PRODH	5625	0.00528973
214240_at	0.00577565	-0.00276986	-0.000745663	-0.00348097	0.00214552	-0.000928553	0.000597119	0.00530788	3.6335e-05	0.000292636	0.000330585	-2.55449	2.34459	-2.24634	2.76593	1.42656	7.82886	49.8647	2.21588e-06	0.000123979	AL556409	galanin prepropeptide	GAL	51083	0.000745663
214247_s_at	-0.0044462	-0.00606434	-0.0033915	0.00443519	-0.00341447	0.00117248	-0.00025802	0.000618005	0.000327727	0.000530602	0.00148453	1.38504	0.90304	1.60305	0.371044	-3.00212	8.71765	102.827	8.85958e-08	2.30404e-05	AU148057	dickkopf homolog 3 (Xenopus laevis)	DKK3	27122	0.0033915
214254_at	5.7431e-05	-0.00579793	0.000869685	-0.00843361	-0.00900535	0.00601778	-0.00316296	7.19953e-05	0.000376909	-0.00087125	-0.000565523	-0.530457	5.60099	0.127414	-0.901331	-0.820593	4.44788	191.321	5.35152e-09	6.79681e-06	AW438674	melanoma antigen family A, 4	MAGEA4	4103	-0.000869685
214295_at	-0.0027273	-0.00601144	0.00652373	0.00638809	0.000277489	-0.00122487	0.00614099	-6.35317e-05	0.000489405	0.000439249	0.000296202	-0.532676	-0.457154	2.39141	0.347217	-1.14069	4.76991	106.619	7.52838e-08	2.14139e-05	AW129056	hypothetical LOC57235	KIAA0485	57235	-0.00652373
214390_s_at	0.00439281	-0.00171832	-0.00655713	0.00310728	0.00789411	-0.00142306	-0.00060789	0.00135295	-0.000760401	0.00178807	-0.00137646	-0.309154	-0.426513	-1.21482	1.68932	0.13499	6.50727	52.4613	1.77279e-06	0.000111205	AI652662	branched chain amino-acid transaminase 1, cytosolic	BCAT1	586	0.00655713
214396_s_at	0.0032954	-0.00841814	-0.00409757	0.000529006	0.000140188	0.000742328	-3.05274e-05	0.00151457	0.000421622	-0.000331272	-0.000659253	-1.24959	2.94157	-0.949106	3.16328	-1.20705	5.25887	145.962	1.82491e-08	1.20077e-05	AI827820	methyl-CpG binding domain protein 2	MBD2	8932	0.00409757
214414_x_at	-0.00353567	-0.00343631	0.00938938	0.00314136	-0.00205208	-0.000981507	0.00421071	0.00018506	-0.000513759	-0.00122118	-0.000485817	-1.34679	-0.684915	7.62771	-2.16546	-2.0664	6.24497	456.006	1.01976e-10	1.94578e-06	T50399	hemoglobin, alpha 1	HBA1	3039	-0.00938938
214427_at	0.00525966	-0.00370651	0.00302025	0.00173709	0.00529769	-0.00138014	0.00397825	0.00157472	-0.000190107	-2.73612e-05	0.000467708	-1.60877	0.0848853	-0.166266	1.70716	0.553212	8.21133	64.3365	7.19677e-07	7.25831e-05	NM_006170	NOP2 nucleolar protein homolog (yeast)	NOP2	4839	-0.00302025
214452_at	0.00582966	-0.00170041	-0.00422186	0.00101207	0.00324353	0.00135735	-0.000433198	0.0010918	-0.00123682	-5.02498e-05	8.03054e-05	-1.25086	0.721822	-2.2733	2.63837	0.766876	5.82103	55.2034	1.41644e-06	0.000101517	NM_005504	branched chain amino-acid transaminase 1, cytosolic	BCAT1	586	0.00422186
214468_at	-0.00117756	-0.00637583	0.0063641	0.00844955	0.00244608	-0.00227102	0.00456754	0.000321628	8.9087e-05	4.5719e-05	-0.000392107	-1.38289	-1.25002	3.44539	1.62395	-1.57999	6.70787	169.706	9.22033e-09	8.3618e-06	D00943	myosin, heavy chain 6, cardiac muscle, alpha	MYH6	4624	-0.0063641
214532_x_at	0.00293486	-0.00833423	-0.00458217	0.00130148	0.00254394	-0.000257526	-0.00028295	0.00332718	-0.000424114	-0.00169654	0.000159259	-1.01792	2.03751	-0.866335	3.17787	-1.20227	7.99566	80.1469	2.70617e-07	4.56149e-05	AF268615	POU class 5 homeobox 1B	POU5F1B	5462	0.00458217
214586_at	0.00452678	0.00604639	0.00372122	-0.00284904	0.00253042	-0.00177194	0.00192542	0.00317755	0.00281695	-0.00112157	0.000392771	-0.965469	-0.791111	-0.843682	-0.117628	1.87005	4.60015	58.32	1.1115e-06	8.94789e-05	T16257	G protein-coupled receptor 37 (endothelin receptor type B-like)	GPR37	2861	-0.00372122
214745_at	0.00600988	-0.00104106	-0.00115748	-0.000274861	0.0046468	-0.00155437	0.00190242	0.00155899	-0.00145613	0.00393107	-0.000756515	-1.34197	0.132233	-1.35073	1.82871	0.97924	5.60246	54.4985	1.49899e-06	0.000104552	AW665865	phospholipase C, eta 1	PLCH1	23007	0.00115748
214829_at	0.0048335	-0.00431823	0.00416765	-0.00465164	0.000148004	0.00398351	-0.00236313	0.00335852	-0.00188686	0.000104746	-0.000406267	-2.61541	3.52777	-0.581673	1.26193	0.98598	7.30258	51.1285	1.98519e-06	0.000118618	AK023446	aminoadipate-semialdehyde synthase	AASS	10157	-0.00416765
214930_at	0.00556105	0.00293604	0.00363583	-0.00180844	0.00471609	-0.00168208	-0.00010357	-3.6562e-05	-4.76991e-05	0.000564974	-0.000754741	-1.99993	-0.624436	-1.33824	0.950319	2.46669	6.66592	87.7422	1.80514e-07	3.53348e-05	AW449813	SLIT and NTRK-like family, member 5	SLITRK5	26050	-0.00363583
214983_at	0.0059601	0.001418	-0.00210433	-0.00353993	0.00258056	0.000137946	-0.00263221	0.0015218	-0.000100901	-0.000475675	0.00100824	-0.894947	0.636095	-1.78011	0.977	1.21832	6.06552	119.099	4.57303e-08	1.77203e-05	AL080135	testis-specific transcript, Y-linked 15 (non-protein coding)	TTTY15	64595	0.00210433
215011_at	0.00589926	-0.00317121	-0.00229497	-0.00154346	0.00240175	0.00085516	0.000314679	0.00057131	-0.0014204	0.00119321	0.000379487	-1.42314	1.39171	-1.59714	2.05568	0.653545	6.47314	71.6985	4.44698e-07	5.76028e-05	AJ006835	small nucleolar RNA host gene 3 (non-protein coding)	SNHG3	8420	0.00229497
215028_at	0.00407644	-0.00784179	-0.00180088	0.00075108	-0.00057309	0.00243525	-0.000515015	0.00183905	-0.000405338	0.000264818	-8.10403e-05	-2.00825	3.56135	-0.868491	3.35716	-0.837976	6.51481	127.048	3.4169e-08	1.57084e-05	AB002438	sema domain, transmembrane domain (TM), and cytoplasmic domain, (semaphorin) 6A	SEMA6A	57556	0.00180088
215043_s_at	0.00367168	0.00708983	0.00353865	-0.0050896	0.0017989	0.000818455	-0.000675166	0.00377441	0.00286716	0.000352629	-0.000550847	-0.908134	-0.534863	-1.30469	-0.893918	2.55216	5.35281	55.6126	1.37105e-06	9.98979e-05	X83301	glucuronidase, beta pseudogene	SMA4	11039	-0.00353865
215239_x_at	0.00567215	-0.00419846	-0.00150173	-0.00079289	0.00219539	0.00274791	8.63703e-05	0.00206511	-0.000388426	3.61322e-05	-0.000817143	-1.6595	1.78	-1.41399	2.27854	0.489802	6.11919	67.0164	6.00443e-07	6.63806e-05	AU132789	zinc finger protein 273	ZNF273	10793	0.00150173
215303_at	0.00173788	-0.00896221	-0.00431801	0.00340798	0.00338954	-0.00148338	-0.00034965	0.00116186	-0.00267512	-0.00105945	0.000414968	-0.52287	0.968815	-0.194512	2.28516	-1.19383	4.52841	54.1964	1.53616e-06	0.000104846	BE046461	doublecortin-like kinase 1	DCLK1	9201	0.00431801
215356_at	0.00171421	-0.00904045	-0.00472442	0.00260859	0.00343591	-0.000400951	0.000425456	-0.000270228	-0.000838828	0.00134717	0.000750647	-0.767804	1.82762	-0.431663	3.59355	-1.94933	7.00037	58.8545	1.06758e-06	8.81667e-05	AK023134	tudor domain containing 12	TDRD12	91646	0.00472442
215389_s_at	-0.00364141	-0.00431796	0.00770911	0.00600082	0.000178678	0.000174019	0.0035737	-0.000375162	-0.00018841	-0.00168048	-0.000780548	-0.445333	-0.855166	3.5428	-0.309076	-1.42543	7.00816	79.441	2.81522e-07	4.7307e-05	X79857	troponin T type 2 (cardiac)	TNNT2	7139	-0.00770911
215470_at	0.00595637	-0.00215465	-0.000860966	-0.000209371	0.00364513	-0.00322329	0.000832687	0.00292679	-0.000896268	-0.000974918	0.000676175	-1.40956	0.381828	-1.18646	1.89159	0.812197	6.53187	61.9737	8.49491e-07	7.8367e-05	U21915	general transcription factor IIH, polypeptide 2B	GTF2H2B	653238	0.000860966
215532_x_at	0.00306534	-0.00606041	-0.00397967	0.00683858	0.00600553	-0.00198099	0.00200387	0.000378214	-0.0044874	0.00172885	-0.000503688	-0.930104	-0.515206	-0.562332	3.54639	-0.887536	4.68645	71.2606	4.5699e-07	5.76028e-05	AB040906	zinc finger protein 492	ZNF492	57615	0.00397967
215594_at	0.00232027	-0.00823514	-0.00595537	0.00172732	0.0024082	0.00144279	-0.00137293	0.00270023	0.000440747	-0.0035261	-0.000697247	-0.451672	1.59048	-0.771123	2.32773	-1.11623	5.53539	59.7463	9.98897e-07	8.5262e-05	AU148611	---	---		0.00595537
215722_s_at	0.00602904	-0.000612518	-0.00239423	-0.00381019	0.0016642	-0.000684925	-0.00059958	0.00241527	0.000181809	-0.000378206	-0.000589197	-1.01035	0.987426	-1.58723	1.19892	0.940087	8.21634	68.0841	5.59728e-07	6.45519e-05	AJ130971	small nuclear ribonucleoprotein polypeptide A'	SNRPA1	6627	0.00239423
215867_x_at	-0.00368222	0.00193787	-0.00992626	0.00150067	-0.000309442	0.00184971	-0.00250212	-0.0056061	0.000352979	-0.000185077	0.000319379	2.15886	-0.64519	-0.946223	-0.333082	-1.09093	7.85421	50.8529	2.03291e-06	0.00011938	AL050025	carbonic anhydrase XII	CA12	771	0.00992626
216000_at	0.00243949	-0.00870025	-0.00458569	0.000741727	-0.00134403	0.00202871	-0.00332181	0.00280263	5.12224e-05	0.0010958	0.00151932	-0.459358	1.85433	-0.486849	1.51926	-0.847023	4.95271	60.6081	9.37563e-07	8.28529e-05	AA732995	---	---		0.00458569
216170_at	0.00317351	-0.00771013	-0.00502984	0.00320739	0.00257452	-0.000602669	0.000262648	0.00202828	-0.00257993	0.00195121	-0.000462	-0.614946	0.931399	-0.604915	2.18186	-0.746817	4.71913	78.8549	2.90986e-07	4.75796e-05	AK025271	---	---		0.00502984
216202_s_at	0.00324156	0.00624059	-0.00624002	-0.00578423	-0.00111276	0.000716635	-0.00372033	-0.000232749	0.000959242	-0.0020941	0.000767625	0.332691	0.280282	-2.0073	-0.230352	1.06565	6.25724	49.7024	2.24782e-06	0.000124883	U15555	serine palmitoyltransferase, long chain base subunit 2	SPTLC2	9517	0.00624002
216251_s_at	0.00501548	0.00465695	0.00369359	-0.00403702	0.00279676	-0.000492556	1.92179e-05	0.00350134	0.000356056	0.00192757	-0.00326622	-0.81928	-0.143271	-0.709965	0.0306085	1.31994	8.16397	54.4129	1.50941e-06	0.000104594	BF965437	tubulin tyrosine ligase-like family, member 12	TTLL12	23170	-0.00369359
216405_at	-0.00239618	0.00958539	0.000257318	-0.00235701	-0.000870651	0.00010972	0.00175147	-0.0013236	0.000818716	0.000112735	0.000324175	3.16624	-5.06732	-0.671465	-5.80243	2.83879	10.3276	105.888	7.7649e-08	2.1478e-05	M14087	---	---		-0.000257318
216442_x_at	-0.00528678	-0.00357615	-0.00513353	-0.000380586	-0.00262968	0.00114546	-0.000733439	-0.00412813	0.000348082	0.000985969	0.00144239	2.30102	1.07622	0.866684	-0.774501	-2.72122	11.3097	52.6359	1.74705e-06	0.000111079	AK026737	fibronectin 1	FN1	2335	0.00513353
217109_at	0.00259884	-0.00868713	-0.00368064	-0.0025961	0.000175818	0.00307626	-0.00347878	0.00101351	-0.000364086	0.000195209	0.000388827	-0.672384	2.62038	-0.670396	1.59636	-0.818385	4.80937	53.7721	1.59028e-06	0.000106655	AJ242547	mucin 4, cell surface associated	MUC4	4585	0.00368064
217414_x_at	-0.00375708	-0.00307653	0.00909101	0.00363739	-0.00153459	-0.00125791	0.0043269	0.000504165	0.000341573	-0.00163778	-0.000155272	-0.803625	-1.02472	5.66016	-1.59391	-1.56563	7.29711	257.319	1.38994e-09	4.63466e-06	V00489	hemoglobin, alpha 1	HBA1	3039	-0.00909101
217542_at	0.00532312	0.000652186	0.00312663	-0.00682736	-0.00107251	0.00227062	-0.00378614	0.00233302	0.0006543	0.00121518	-0.00095874	-1.15854	1.5339	-0.949255	0.102463	1.21176	6.33285	72.5187	4.22737e-07	5.70047e-05	BE930512	Mdm2 p53 binding protein homolog (mouse)	MDM2	4193	-0.00312663
217617_at	-0.000188809	-0.00973158	-0.00296944	0.00359766	-0.00238238	0.00292625	-0.000255339	0.00146531	0.000185206	0.000387458	0.000170207	-0.266176	1.89824	0.487502	1.56393	-1.73419	6.45568	74.1689	3.82421e-07	5.4961e-05	AW451711	---	---		0.00296944
217707_x_at	-0.00277381	0.00825159	0.00508324	-0.0022216	-0.00251577	0.000378468	0.00206467	0.0005095	-0.00257815	-0.000958214	0.000695129	0.651137	-1.56447	0.773192	-2.59166	1.08266	8.54927	54.389	1.51234e-06	0.000104594	AI535683	SWI/SNF related, matrix associated, actin dependent regulator of chromatin, subfamily a, member 2	SMARCA2	6595	-0.00508324
217720_at	0.0039684	0.00558375	-0.00338461	0.00440274	0.00621366	-0.00433288	0.00178748	0.00116906	0.000434005	0.000143121	-0.00236131	-0.192189	-2.15822	-1.33211	1.0326	1.11127	11.7129	52.8706	1.71318e-06	0.000110724	NM_016139	coiled-coil-helix-coiled-coil-helix domain containing 2	CHCHD2	51142	0.00338461
217724_at	0.00623308	-0.000605448	-0.000823289	-0.00247951	0.00162494	-0.000298353	-0.00244869	0.000445043	-0.000233483	0.000848562	0.00296506	-0.97521	0.779696	-1.20119	1.00674	0.844943	11.808	53.4003	1.63962e-06	0.000108015	AF131807	SERPINE1 mRNA binding protein 1	SERBP1	26135	0.000823289
217728_at	-0.0025583	0.00905077	0.000324631	-0.00355991	-0.00385169	0.000494496	-0.000497907	-0.000721927	0.000829927	-0.000301508	0.000706112	2.38396	-2.14947	-0.524653	-4.77904	1.86832	10.2364	92.9459	1.39442e-07	2.95979e-05	NM_014624	S100 calcium binding protein A6	S100A6	6277	-0.000324631
217785_s_at	0.00536334	0.00446954	0.000717146	0.00072969	0.00540821	-0.00172223	0.00108812	0.00158004	0.00066578	-0.00135837	0.00123123	-0.726959	-0.910291	-0.9456	0.658277	1.22194	5.90207	58.1295	1.1277e-06	8.94789e-05	NM_006555	YKT6 v-SNARE homolog (S. cerevisiae)	YKT6	10652	-0.000717146
217867_x_at	-0.00230986	-0.00615345	-0.00781518	0.00602227	0.00216381	-0.00233346	0.00107211	-0.00195325	0.000877056	0.000429411	0.000362547	1.07542	-0.34905	0.107292	1.86541	-2.2742	7.46717	73.7602	3.91953e-07	5.55993e-05	NM_012105	beta-site APP-cleaving enzyme 2	BACE2	25825	0.00781518
217869_at	0.00610845	-0.00017041	0.000652106	-0.00285216	0.00358683	0.000498747	0.000607112	0.00236147	0.000540053	0.00170186	0.00055783	-0.955044	0.434129	-0.86449	0.823339	0.837769	10.6588	49.529	2.28257e-06	0.0001263	NM_016142	hydroxysteroid (17-beta) dehydrogenase 12	HSD17B12	51144	-0.000652106
217921_at	0.00442474	0.00653513	0.00343674	-0.00321653	0.000883989	-3.76807e-05	-0.00170163	0.00355879	0.00146787	7.49725e-05	-0.000253819	-1.11624	-0.54239	-1.37921	-0.481975	2.53783	5.15425	51.2024	1.97262e-06	0.000118256	BE543064	mannosidase, alpha, class 1A, member 2	MAN1A2	10905	-0.00343674
217964_at	0.00622782	-0.000835081	-0.000613517	-0.00205364	0.00243253	0.00176095	-0.000749752	0.000935574	0.000285958	0.000575024	-0.00100872	-1.17768	0.85697	-1.29873	1.22508	0.941123	9.66354	59.7426	9.9917e-07	8.5262e-05	NM_017775	tetratricopeptide repeat domain 19	TTC19	54902	0.000613517
218009_s_at	0.00603668	-0.00242542	0.000329908	-0.00192467	0.00344787	0.000526297	0.00141045	0.000186739	-6.99228e-05	0.000130146	-0.000718847	-1.61982	0.996691	-1.15915	1.69644	0.929402	9.18676	55.1216	1.42572e-06	0.000102049	NM_003981	protein regulator of cytokinesis 1	PRC1	9055	-0.000329908
218016_s_at	0.00625177	-0.00115212	0.000386119	-0.00121421	0.00246291	-0.00184875	-4.15888e-05	0.000526446	0.000192794	0.00109882	0.000219491	-1.58816	0.664917	-1.29545	1.61895	1.15085	8.29393	65.415	6.68506e-07	7.06173e-05	NM_018119	polymerase (RNA) III (DNA directed) polypeptide E (80kD)	POLR3E	55718	-0.000386119
218073_s_at	0.00618318	0.00183918	-0.000840875	-0.000703964	0.00266227	-0.000889711	-0.00174714	0.0004283	0.000953282	-0.000786995	0.000960945	-1.19262	0.0819132	-1.75377	1.28335	1.47893	6.46857	51.3981	1.93982e-06	0.000117708	NM_018087	transmembrane protein 48	TMEM48	55706	0.000840875
218092_s_at	0.00528897	0.00104442	-0.00564611	-0.00503307	0.000823382	0.00215913	-0.00167813	0.00195663	-0.000675792	0.000168675	0.000465068	-0.398244	1.01261	-1.89901	0.795011	0.796706	8.28584	52.5797	1.75529e-06	0.000111079	NM_004504	ArfGAP with FG repeats 1	AGFG1	3267	0.00564611
218123_at	0.00622762	-0.000622358	-0.000218121	0.0003889	0.00338049	-0.00192702	-0.000685973	0.0010662	0.00041664	0.00106515	0.00241256	-1.21072	0.175406	-1.13206	1.45873	0.934475	8.98894	59.3416	1.02938e-06	8.63864e-05	NM_017835	chromosome 21 open reading frame 59	C21orf59	56683	0.000218121
218251_at	0.00608098	0.000640534	0.000925288	-0.00297586	0.00278248	-0.000482617	-0.00213685	0.0026618	-0.00285957	0.000852827	0.000770215	-1.13479	0.537875	-1.15093	0.869556	1.14308	7.41859	66.7624	6.10658e-07	6.68334e-05	NM_021242	MID1 interacting protein 1 (gastrulation specific G12 homolog (zebrafish))	MID1IP1	58526	-0.000925288
218265_at	0.00503111	-0.0065076	0.000255669	-9.24913e-05	0.000250438	0.000804786	0.000205813	-0.000328676	-0.00148564	0.0010259	-0.000794219	-1.36888	1.62965	-0.461515	1.68096	0.0126968	7.55781	51.4906	1.92454e-06	0.000117436	NM_024077	SECIS binding protein 2	SECISBP2	79048	-0.000255669
218308_at	0.00533008	-0.00529474	0.0020487	-0.00204959	0.00190509	0.00119102	6.33974e-05	-0.000463313	-0.0007348	0.000815066	0.000579533	-1.60009	1.61848	-0.487149	1.48034	0.398464	7.85142	50.5769	2.0821e-06	0.000120651	NM_006342	transforming, acidic coiled-coil containing protein 3	TACC3	10460	-0.0020487
218338_at	0.00347599	-0.00822533	-0.00362395	0.00109872	0.00214194	-0.000570138	-0.000777901	0.00140681	-0.000171397	0.000159621	-0.000453168	-1.32123	2.27873	-0.900373	3.28632	-1.02898	9.49748	133.36	2.74497e-08	1.40104e-05	NM_004426	polyhomeotic homolog 1 (Drosophila)	PHC1	1911	0.00362395
218377_s_at	0.000101864	0.00975099	0.00226105	0.00177584	0.00463698	-0.00226192	0.00261979	0.000865045	0.000621181	-0.00087401	-0.000946465	0.20602	-2.04284	-0.185399	-0.63606	1.02257	7.44637	51.2998	1.95621e-06	0.000117919	NM_016940	RWD domain containing 2B	RWDD2B	10069	-0.00226105
218465_at	0.00585941	0.00191803	0.000799044	-0.00539562	-0.00103434	0.000686793	-0.00128007	6.3497e-05	-0.00100368	0.000167969	-6.93223e-05	-1.46411	1.48913	-1.85933	0.474097	1.89122	7.57535	64.2963	7.21671e-07	7.25831e-05	NM_018126	transmembrane protein 33	TMEM33	55161	-0.000799044
218497_s_at	0.00596719	-0.00145578	0.000191114	-0.00489944	0.000168495	0.000279914	-0.00266833	0.000223667	0.000683303	0.000184107	-0.00131155	-0.96335	1.2179	-0.994529	0.70826	0.748231	8.38139	50.0377	2.18243e-06	0.000123002	NM_002936	ribonuclease H1	RNASEH1	246243	-0.000191114
218499_at	0.00576441	-0.000682599	0.0028704	-0.00509087	0.000903321	-0.00206337	-0.000297597	0.00347849	-0.000433634	1.46697e-05	-0.000625761	-2.35717	1.7448	-1.3714	1.15848	1.91752	9.64393	57.1102	1.21934e-06	9.48604e-05	NM_016542	serine/threonine protein kinase MST4	MST4	51765	-0.0028704
218517_at	0.00355068	-0.00841808	0.000225242	-0.00290923	9.87192e-05	0.00248779	-0.00156224	-0.000152607	0.000119514	-0.000371693	0.00142751	-1.48357	3.03747	-0.316022	1.7449	-0.481508	9.0026	56.8657	1.24266e-06	9.54504e-05	NM_024900	PHD finger protein 17	PHF17	79960	-0.000225242
218536_at	0.00492277	-0.00594878	-0.00188483	-0.00289171	0.000745446	0.0035833	-0.000242256	0.000211449	-0.00145588	6.76067e-05	0.000650772	-1.6332	2.98908	-1.35291	2.20722	0.0672982	7.72707	54.4091	1.50988e-06	0.000104594	AF052167	MRS2 magnesium homeostasis factor homolog (S. cerevisiae)	MRS2	57380	0.00188483
218542_at	0.0060966	-0.00226084	-5.67469e-07	-0.00251297	0.00241573	0.00069859	-0.0012508	0.000190808	-0.000365824	0.000374511	-7.11532e-05	-1.72198	1.48545	-1.50873	1.7522	1.06452	7.13942	94.5968	1.28855e-07	2.78194e-05	NM_018131	centrosomal protein 55kDa	CEP55	55165	5.67469e-07
218662_s_at	0.00565274	-0.0030085	0.0038965	0.000414922	0.00379671	0.00114489	0.00102993	0.000750561	-0.00097987	0.000309455	-0.000899106	-2.73593	0.978664	-0.522732	2.2772	1.24006	8.16915	62.3639	8.262e-07	7.79297e-05	NM_022346	non-SMC condensin I complex, subunit G	NCAPG	64151	-0.0038965
218678_at	-0.000602253	-0.00867185	-0.00597408	0.00101928	-0.00204947	0.00535023	-0.00260091	-0.00127153	-0.000789262	0.00104512	0.00110417	0.301293	2.64721	-0.214515	1.47213	-2.02211	8.01838	54.9151	1.44952e-06	0.000102809	NM_024609	nestin	NES	10763	0.00597408
218718_at	0.000778073	0.00986184	0.00344677	-0.00221775	0.00111912	-0.00239476	0.00155194	0.000627836	-0.00030797	0.000120287	0.000889099	0.0871613	-2.24862	-0.49537	-1.65643	2.09691	9.47638	120.611	4.32025e-08	1.73487e-05	NM_016205	platelet derived growth factor C	PDGFC	56034	-0.00344677
218720_x_at	-0.00120975	-0.00768234	-0.00781675	0.00143411	-0.00235103	0.00311936	-0.00395461	1.4359e-05	0.00176593	0.00182318	-0.000566265	0.535312	1.58715	-0.33935	0.990155	-1.49823	6.70617	69.0814	5.24693e-07	6.21426e-05	NM_012410	seizure related 6 homolog (mouse)-like 2	SEZ6L2	26470	0.00781675
218737_at	0.00622236	-0.000409506	-0.00213241	-0.00031468	0.00248846	-0.00139258	-0.000987173	0.000938218	-0.00144637	0.000360954	-0.000408032	-1.16223	0.429809	-1.63527	1.65792	1.00385	6.50115	60.1578	9.69023e-07	8.45387e-05	NM_018183	strawberry notch homolog 1 (Drosophila)	SBNO1	55206	0.00213241
218820_at	-0.00334812	-0.00577198	-0.00764758	0.00332434	-0.0037197	0.000372353	-0.00157326	-0.00137903	0.00101146	3.01889e-05	0.00163467	1.17199	0.887658	0.121312	0.61328	-1.9576	8.35452	63.4972	7.62825e-07	7.50359e-05	NM_020215	chromosome 14 open reading frame 132	C14orf132	56967	0.00764758
218868_at	0.00620886	-0.00107494	0.000142534	-0.00109664	0.00345294	0.000465161	0.00100324	0.000922786	-0.00186697	-0.00032698	0.000546214	-1.93624	0.770829	-1.63416	2.04971	1.40226	7.279	83.5864	2.24286e-07	4.01604e-05	NM_020445	ARP3 actin-related protein 3 homolog B (yeast)	ACTR3B	57180	-0.000142534
218882_s_at	0.00623839	-0.000164896	0.00249971	-0.000814214	0.00172087	-0.000598365	0.000923067	0.00144358	4.77647e-05	5.32981e-05	-0.000673086	-1.88091	0.539706	-1.04858	1.37627	1.48255	9.04321	72.2059	4.30952e-07	5.74039e-05	NM_006784	WD repeat domain 3	WDR3	10885	-0.00249971
218897_at	0.00613027	-0.00109685	0.00105434	-0.00302777	0.00244155	0.00158568	0.000946017	0.0012455	-0.000393602	0.000146624	-0.000712437	-1.73006	1.1873	-1.32314	1.38881	1.29051	7.23441	71.738	4.43609e-07	5.76028e-05	NM_030577	transmembrane protein 177	TMEM177	80775	-0.00105434
219002_at	0.00560855	-0.00435754	0.00286961	0.000320353	0.000147667	-0.000796894	0.000187384	0.00309318	0.00046447	0.000832437	-0.00115884	-1.98501	1.38857	-0.405719	1.76	0.619301	8.83394	60.3164	9.578e-07	8.40724e-05	NM_024622	FAST kinase domains 1	FASTKD1	79675	-0.00286961
219031_s_at	0.00538227	0.00480237	0.00249553	-0.0028003	0.0015052	-0.00010203	-0.00207068	0.000815021	-0.0019884	-0.00092535	-9.90926e-05	-1.18189	-0.120762	-1.41626	0.17023	2.05283	7.85413	53.6901	1.60101e-06	0.000106655	NM_016101	nuclear import 7 homolog (S. cerevisiae)	NIP7	51388	-0.00249553
219073_s_at	0.00168608	-0.00633025	-0.00936301	-0.00115616	-0.00201753	0.00200504	-0.00466465	0.0011425	-0.000767084	0.000754964	0.000866902	0.271813	2.34584	-1.53573	1.64244	-1.1249	7.61674	110.132	6.50662e-08	2.02965e-05	NM_017784	oxysterol binding protein-like 10	OSBPL10	114884	0.00936301
219099_at	0.00611341	0.00133027	0.000864871	-0.000755037	0.00309588	0.00134911	-0.000664068	0.00418732	-0.00054882	0.000479623	-0.000309132	-2.37525	0.378729	-2.33257	2.02244	2.45576	7.52393	55.7911	1.35181e-06	9.92742e-05	NM_020375	chromosome 12 open reading frame 5	C12orf5	57103	-0.000864871
219105_x_at	0.00549416	-0.0040414	0.00361803	-0.00304892	0.00108475	0.000433208	0.000155756	0.00102328	-0.00176207	0.000190917	-0.000435731	-1.86082	1.68558	-0.446645	1.25386	0.760818	9.41436	91.0755	1.52747e-07	3.12434e-05	NM_014321	origin recognition complex, subunit 6	ORC6	23594	-0.00361803
219115_s_at	0.00397184	0.00696954	0.00436662	-0.00320558	0.00190718	-0.00153098	-0.000579159	0.00262001	0.000549151	0.000967724	0.000475167	-1.28876	-1.23368	-1.26236	-0.73947	3.03454	5.61955	133.908	2.69457e-08	1.38829e-05	NM_014432	interleukin 20 receptor, alpha	IL20RA	53832	-0.00436662
219133_at	0.00124726	0.0083516	0.0056331	-0.00607457	-0.00109407	0.00101779	-3.68354e-05	-6.45746e-05	0.00106561	0.000108257	-0.000643953	-0.205243	-0.326814	-0.223234	-1.23659	1.2874	7.41896	64.7534	6.99348e-07	7.20631e-05	NM_017897	3-oxoacyl-ACP synthase, mitochondrial	OXSM	54995	-0.0056331
219196_at	0.00305184	-0.00852799	-0.00413568	0.000813467	0.000729152	0.0013378	-0.00220571	0.00141197	-0.000932829	-0.00143916	0.000910909	-1.01706	2.67276	-0.872042	2.82549	-1.17617	4.32372	184.231	6.35233e-09	7.38128e-06	NM_013243	secretogranin III	SCG3	29106	0.00413568
219439_at	0.00622797	-0.00119974	0.000160968	-0.000502881	0.00238313	0.00115278	-0.0023628	0.00202739	-0.000895324	-0.000159413	-0.00023596	-1.77941	1.05227	-1.62618	1.88414	1.25668	7.94352	59.3571	1.02818e-06	8.63864e-05	NM_020156	core 1 synthase, glycoprotein-N-acetylgalactosamine 3-beta-galactosyltransferase, 1	C1GALT1	56913	-0.000160968
219459_at	0.00527302	-0.000933937	0.00655448	-0.00384186	0.000298509	0.00171992	0.000445884	0.00193364	-0.00109087	0.00030464	-0.001238	-1.23647	0.838865	-0.145648	0.289154	0.861178	8.12242	55.2437	1.41189e-06	0.000101325	NM_018082	polymerase (RNA) III (DNA directed) polypeptide B	POLR3B	55703	-0.00655448
219464_at	0.00151461	-0.00955757	-0.00363753	0.0027199	0.000645643	-0.000938917	0.0020726	0.00130742	-0.000698215	-0.00238096	-0.000532133	-0.687159	1.59526	0.070706	2.37947	-1.47804	7.39534	54.8716	1.45459e-06	0.000103035	NM_012113	carbonic anhydrase XIV	CA14	23632	0.00363753
219466_s_at	0.000449383	-0.00520233	-0.000770654	-0.00940793	-0.00787755	0.00623889	-0.00502776	0.000895019	7.59712e-05	0.00289027	-0.000381234	-0.196197	3.26372	-0.329568	-0.439265	-0.379155	4.44473	64.256	7.23682e-07	7.26516e-05	NM_001643	apolipoprotein A-II	APOA2	336	0.000770654
219493_at	0.00618241	0.00125639	0.00113477	-0.00251986	0.00176043	0.00156393	0.000847246	0.00158212	-0.000125012	0.000870194	0.000485985	-1.79602	0.768109	-1.70049	1.19279	1.87845	6.33872	60.1609	9.68799e-07	8.45387e-05	NM_024745	SHC SH2-domain binding protein 1	SHCBP1	79801	-0.00113477
219497_s_at	0.00584106	0.000430955	0.0033085	-0.00338066	0.00340312	-0.00248684	0.00123561	0.000703277	-0.000524232	2.27463e-05	-0.000276298	-1.71831	0.372035	-0.920584	0.971235	1.56053	7.94295	55.6442	1.36762e-06	9.98528e-05	NM_022893	B-cell CLL/lymphoma 11A (zinc finger protein)	BCL11A	53335	-0.0033085
219622_at	-0.003897	-0.00403377	-0.00734773	-0.00266972	-0.00502076	0.0034383	-0.00324618	-0.0020938	0.000815363	0.0023772	0.000467739	1.07717	1.3777	-0.156653	-0.280115	-1.24523	7.87141	62.7402	8.04467e-07	7.68634e-05	NM_017817	RAB20, member RAS oncogene family	RAB20	55647	0.00734773
219628_at	0.00440946	0.00693857	0.00116305	-0.002297	0.00220905	-0.00295399	0.00182976	0.00317864	0.000320225	0.000744294	0.000473503	-0.909273	-1.50117	-1.70021	-0.0426712	2.57159	7.56827	51.2841	1.95884e-06	0.000117947	NM_022470	zinc finger, matrin-type 3	ZMAT3	64393	-0.00116305
219651_at	0.00216339	-0.00969312	-0.00221447	0.00117147	-0.000332284	0.0017132	-8.12524e-05	0.00104862	-0.000211356	0.000221905	0.000226098	-2.05273	5.06969	-0.0214575	4.58596	-2.68016	6.2434	504.204	6.43991e-11	1.94578e-06	NM_018189	developmental pluripotency associated 4	DPPA4	55211	0.00221447
219668_at	0.00239305	-0.00688528	-0.0062376	0.00486445	0.00563026	-0.00085774	0.000697741	0.00218458	-0.000978775	-0.0011431	-0.000684046	-0.252563	0.133178	-0.466384	1.73192	-0.635519	6.08023	49.7973	2.22909e-06	0.000124116	NM_024034	ganglioside-induced differentiation-associated protein 1-like 1	GDAP1L1	78997	0.0062376
219683_at	0.00618697	-0.000752083	-0.00171067	-0.00065742	0.00254117	0.000342542	-0.00117206	0.00322335	0.00203475	-0.000245369	0.00109343	-1.10562	0.599286	-1.41628	1.45113	0.882624	6.30143	61.9957	8.48157e-07	7.8367e-05	NM_017412	frizzled homolog 3 (Drosophila)	FZD3	7976	0.00171067
219696_at	0.00511252	0.00433922	0.00100262	0.00159223	0.00552884	-0.00303914	0.0027816	0.00431513	8.37462e-05	0.000217037	0.000207119	-0.968912	-1.46274	-1.02139	0.930686	1.51696	6.55161	62.0795	8.43097e-07	7.81055e-05	NM_019049	DENN/MADD domain containing 1B	DENND1B	163486	-0.00100262
219733_s_at	0.00518991	0.00543453	0.00184978	-0.00319232	0.0019103	-0.000633559	-0.00107148	0.000579723	0.00188544	0.000324953	-0.00127184	-0.787316	-0.25938	-1.1514	0.0710954	1.59398	7.48806	62.6904	8.07303e-07	7.68634e-05	NM_012254	solute carrier family 27 (fatty acid transporter), member 5	SLC27A5	10998	-0.00184978
219737_s_at	-0.00373168	0.00380741	0.00878939	-0.000932956	-0.00262336	-0.00268549	0.00378358	-0.00313518	0.00177769	0.00173268	-0.000998175	0.142857	-1.24669	2.14819	-2.32172	0.388394	6.78093	51.5961	1.90732e-06	0.000116723	AI524125	protocadherin 9	PCDH9	5101	-0.00878939
219787_s_at	0.00604665	-0.0019311	-0.0022315	-0.00288755	0.00171042	1.93078e-05	-0.000711566	0.000765691	-0.0020937	0.000893979	0.000364191	-1.95825	2.05591	-2.61174	2.50751	1.34243	8.27894	105.694	7.82926e-08	2.1478e-05	NM_018098	epithelial cell transforming sequence 2 oncogene	ECT2	1894	0.0022315
219789_at	-0.00600783	0.00137727	-0.00340608	0.00143031	-0.00129334	0.000567056	-0.00254971	-0.00259235	-0.000176509	4.27824e-05	-0.000444747	2.23796	-0.932032	0.765248	-1.49467	-1.441	5.30186	81.3981	2.52523e-07	4.39204e-05	AI628360	natriuretic peptide receptor C/guanylate cyclase C (atrionatriuretic peptide receptor C)	NPR3	4883	0.00340608
219823_at	0.00133628	-0.00998347	-0.00228669	0.00090058	0.00167579	0.00207773	0.000888037	0.00194253	-0.000433584	0.00020202	-0.000188014	-2.07915	5.37482	0.457485	5.40535	-3.62101	7.11576	58.6658	1.08284e-06	8.88706e-05	NM_024674	lin-28 homolog A (C. elegans)	LIN28A	79727	0.00228669
219895_at	0.0028095	-0.00489782	-0.00586682	0.00808625	0.00576647	-0.00182228	0.00122751	0.00164906	-0.00118344	4.31194e-05	0.000868721	-0.638959	-1.25717	-1.20279	4.5951	-1.20352	4.55955	146.687	1.78448e-08	1.19256e-05	NM_017938	family with sequence similarity 70, member A	FAM70A	55026	0.00586682
219918_s_at	0.00610461	-0.00210205	0.000909571	-0.00177266	0.00297303	0.000674655	-0.00137638	-0.000807891	-0.000650134	0.000485815	-0.00129762	-2.3105	1.58148	-1.70118	2.22994	1.43084	8.08271	58.5403	1.09314e-06	8.9104e-05	NM_018123	asp (abnormal spindle) homolog, microcephaly associated (Drosophila)	ASPM	259266	-0.000909571
219973_at	0.00398946	0.00725651	0.00271543	-0.00112132	0.00383408	-0.00293185	0.00234237	0.00189078	0.000377022	-0.00163554	-0.000863004	-0.5687	-1.25014	-0.719259	-0.0695255	1.51127	5.40283	62.688	8.07439e-07	7.68634e-05	NM_024590	arylsulfatase family, member J	ARSJ	79642	-0.00271543
220030_at	0.00519187	0.00396098	0.00345098	-0.00407548	0.00296358	-0.0019307	-0.000748267	0.00401383	0.00021466	-0.000255787	-0.000230306	-2.07332	-0.215392	-1.76505	0.367441	3.07686	5.69149	106.324	7.62268e-08	2.14586e-05	NM_018423	serine/threonine/tyrosine kinase 1	STYK1	55359	-0.00345098
220053_at	0.00297823	-0.00710268	-0.00501835	0.00538632	0.00437474	-0.00067201	-0.000346083	0.00160001	-0.000978755	-0.000394617	-0.000384802	-1.10547	0.751603	-1.12463	4.73137	-1.54956	7.15854	292.519	7.74802e-10	3.84675e-06	NM_020634	growth differentiation factor 3	GDF3	9573	0.00501835
220115_s_at	0.00325624	0.00733491	0.00589053	-0.00271528	0.00183057	-0.00258011	0.000276466	0.00168227	0.0011278	3.82045e-05	1.85923e-05	-1.19685	-1.62114	-0.626402	-1.0464	2.85243	6.3269	135.892	2.52131e-08	1.36333e-05	NM_006727	cadherin 10, type 2 (T2-cadherin)	CDH10	1008	-0.00589053
220116_at	0.00265463	-0.00910297	-0.00244029	-0.000506437	-0.00208702	0.00163446	-0.0033159	-0.000393907	0.00152459	0.00171034	0.000959572	-0.958815	3.04339	-0.403656	1.93065	-1.07364	5.34687	64.4507	7.14039e-07	7.25831e-05	NM_021614	potassium intermediate/small conductance calcium-activated channel, subfamily N, member 2	KCNN2	3781	0.00244029
220144_s_at	0.00375476	-0.00756489	-0.0024542	-0.00365161	-0.00171567	0.00274643	-0.00275096	0.00182469	0.00140624	0.000523416	0.000570209	-0.682479	1.98818	-0.569142	1.00971	-0.27396	5.46008	62.2042	8.35637e-07	7.81055e-05	NM_022096	ankyrin repeat domain 5	ANKRD5	63926	0.0024542
220173_at	-0.00517047	0.00059299	0.00724757	0.00103403	-0.00306754	0.000719318	0.00223707	-0.00160422	-0.00100148	6.42714e-05	-0.00107626	0.333578	-0.449707	1.83657	-1.45424	-0.438563	5.49481	79.3087	2.83625e-07	4.73539e-05	NM_025057	chromosome 14 open reading frame 45	C14orf45	80127	-0.00724757
220184_at	0.00135386	-0.0100826	-0.00155795	0.00219445	0.000631212	0.00118196	0.000897788	0.001274	-0.0005889	-0.000413573	0.000390275	-2.11592	4.67599	0.939593	5.05746	-3.44078	7.40366	267.546	1.16378e-09	4.63466e-06	NM_024865	Nanog homeobox	NANOG	79923	0.00155795
220205_at	0.0028713	-0.00561753	-0.00480967	0.00715813	0.00615554	-0.00283278	0.00272244	0.00213785	0.000554532	0.000249665	9.07274e-05	-0.784535	-0.869076	-0.676888	3.68874	-0.933673	4.34411	175.782	7.86067e-09	8.20899e-06	NM_013315	transmembrane phosphatase with tensin homology	TPTE	7179	0.00480967
220206_at	0.00597977	-0.00361127	-0.000565699	0.000680595	0.00136156	0.000481225	0.000727918	0.00108689	-0.000428778	0.000532118	-1.1095e-05	-1.46342	1.04424	-0.991707	1.87281	0.527934	6.62715	49.3116	2.32706e-06	0.000127342	NM_024772	zinc finger, MYM-type 1	ZMYM1	79830	0.000565699
220238_s_at	0.00611307	-0.00182145	-0.00274556	5.44829e-05	0.00217724	0.000454598	-0.000565695	0.000378358	-0.00147841	0.0010893	0.000412044	-1.7115	1.17465	-2.336	2.71602	1.06661	5.84436	60.837	9.22053e-07	8.2147e-05	NM_018846	kelch-like 7 (Drosophila)	KLHL7	55975	0.00274556
220294_at	0.00307328	0.00756682	0.00490733	-0.0043613	0.00123801	-0.00089163	0.00168869	0.00406936	0.00154822	-0.000142861	-0.000376354	-0.979184	-1.13223	-0.814807	-1.19924	2.69929	4.59171	60.0204	9.78876e-07	8.47896e-05	NM_014379	potassium channel, subfamily V, member 1	KCNV1	27012	-0.00490733
220493_at	-0.00310154	-0.00492084	0.00549445	0.00848856	0.00242769	-0.0017945	0.00484456	-0.000878018	-0.000578322	0.00091336	0.00140658	-0.210961	-0.93514	1.7649	0.373033	-0.902615	4.52632	61.7369	8.64021e-07	7.90398e-05	NM_021951	doublesex and mab-3 related transcription factor 1	DMRT1	1761	-0.00549445
220532_s_at	-0.00580575	0.00224526	-0.00354845	0.00228492	-0.00339517	0.00116123	-0.000129381	-0.000733371	-0.000115422	0.000202506	2.11501e-05	1.51675	-0.724854	0.527719	-1.09433	-0.897384	5.39315	56.65	1.26368e-06	9.63872e-05	NM_014020	transmembrane protein 176B	TMEM176B	28959	0.00354845
220658_s_at	0.00590422	-3.21438e-05	-0.000493049	0.00102602	0.00623797	-0.002246	0.000246483	-0.000163301	-2.34257e-05	-0.000229168	-4.62609e-05	-1.38365	-0.471871	-1.39335	1.92838	1.18426	5.91041	71.1818	4.59244e-07	5.76028e-05	NM_020183	aryl hydrocarbon receptor nuclear translocator-like 2	ARNTL2	56938	0.000493049
220789_s_at	0.0058446	-0.0024052	-0.00258364	0.000911168	0.00417331	-0.00246155	0.000614098	0.000275816	2.19904e-05	0.000426223	0.00153319	-0.97822	0.223918	-1.12395	1.72558	0.50249	8.09724	52.0864	1.82961e-06	0.000113417	NM_004749	transforming growth factor beta regulator 4	TBRG4	9238	0.00258364
220865_s_at	0.00604909	0.00193055	0.0017108	-0.00321092	0.00139419	0.000314583	-0.00215004	0.000880936	0.000274229	0.000195199	8.70241e-05	-1.81319	0.868356	-1.86134	0.923435	2.14901	6.587	95.6867	1.224e-07	2.74117e-05	NM_014317	prenyl (decaprenyl) diphosphate synthase, subunit 1	PDSS1	23590	-0.0017108
220922_s_at	-0.00469186	-0.00291287	0.00774286	0.00191683	-0.00142327	-0.000304677	0.00360043	0.000328048	-0.00155345	-0.0013538	-0.000914849	-0.0267632	-0.264504	2.57261	-1.03424	-0.910647	5.9789	54.4452	1.50547e-06	0.000104594	NM_013453	sperm protein associated with the nucleus, X-linked, family member A1	SPANXA1	100133171	-0.00774286
220969_s_at	0.00383244	-0.00749692	-0.00394423	-0.00253667	-9.27227e-05	0.00206976	-0.00166872	0.000714681	0.00072634	0.00306458	-0.000399623	-0.650067	1.84221	-0.743879	1.33138	-0.355669	5.21704	50.4702	2.10149e-06	0.000121064	NM_030892	---	---		0.00394423
221016_s_at	-4.87334e-05	-0.00919895	-0.00569432	0.000854857	-0.0031643	0.00174642	-0.00176423	-0.00205908	-0.000293061	0.000176163	0.000353037	0.092824	3.11159	-0.199618	1.92645	-2.28124	7.08358	90.1256	1.60095e-07	3.23825e-05	NM_031283	transcription factor 7-like 1 (T-cell specific, HMG-box)	TCF7L1	83439	0.00569432
221039_s_at	0.00478851	0.00574755	-0.00342951	-0.000305379	0.00460779	-0.000641209	0.000607994	0.00154378	-0.000386812	-0.00165496	-0.000601489	-0.356953	-1.19655	-1.97879	0.769195	1.5622	6.80995	57.5332	1.18024e-06	9.27394e-05	NM_018482	ArfGAP with SH3 domain, ankyrin repeat and PH domain 1	ASAP1	50807	0.00342951
221051_s_at	0.00143996	-0.009109	-0.00335887	0.00467493	0.00349098	0.000300159	-0.00206084	0.000715074	0.000380378	-0.000245804	-0.000137018	-0.598532	1.09627	-0.00230177	2.51897	-1.44467	7.07189	50.3518	2.12329e-06	0.000121806	NM_014446	integrin beta 1 binding protein 3	ITGB1BP3	27231	0.00335887
221258_s_at	0.00616646	0.000236098	-0.00183097	-0.00197445	0.00333674	3.24577e-05	-0.000892548	-0.000723529	0.000329797	-0.000248984	0.000885608	-1.22004	0.584408	-1.86349	1.52436	1.25133	6.37247	62.9736	7.91342e-07	7.66268e-05	NM_031217	kinesin family member 18A	KIF18A	81930	0.00183097
221270_s_at	0.00528724	0.00489262	0.0013673	-0.00307134	0.00371715	-0.00128516	-0.000443967	0.00158869	-0.000153337	-0.00050538	-8.06342e-05	-0.575077	-0.284204	-0.827927	0.209814	1.08189	7.69971	50.9359	2.01838e-06	0.000119207	NM_031209	queuine tRNA-ribosyltransferase 1	QTRT1	81890	-0.0013673
221571_at	0.00486945	0.00553943	0.00358116	-0.00378208	0.002196	-4.27701e-05	-0.000333324	-0.000174597	0.000671486	0.00132853	0.000979779	-0.872466	-0.26356	-0.898445	-0.129393	1.64555	7.747	65.6106	6.59708e-07	6.9823e-05	AI721219	TNF receptor-associated factor 3	TRAF3	7187	-0.00358116
221591_s_at	0.00571404	-0.00387107	-0.00039908	-0.00304291	0.00236937	0.00178007	-0.00109928	0.000793543	-0.000751941	-0.00123984	0.00240271	-1.26801	1.48367	-1.02182	1.39108	0.527286	8.17041	63.158	7.81153e-07	7.60448e-05	BC005004	family with sequence similarity 64, member A	FAM64A	54478	0.00039908
221605_s_at	0.00269855	-0.00846361	-0.00472405	0.0023961	0.00234255	0.000159505	-0.000243667	0.00272528	-0.000900261	-0.000363196	-0.000804403	-1.15726	2.36344	-0.934899	4.04506	-1.704	6.56827	209.26	3.56133e-09	5.557e-06	AF136970	pipecolic acid oxidase	PIPOX	51268	0.00472405
221648_s_at	0.00528174	-0.00527176	-0.00216628	-0.00117883	0.00256888	-0.000493663	-0.00177184	0.00248264	0.000106745	-0.000258902	-0.000773958	-1.19297	1.4218	-1.07908	1.89613	0.174341	5.48228	93.9132	1.33117e-07	2.86216e-05	AK025651	hypothetical LOC100507192	LOC100507192	100507192	0.00216628
221652_s_at	0.0062385	-0.000610809	-0.00169969	-0.00156652	0.00191595	0.00150879	-0.000271059	0.00176079	-0.000638457	0.000433774	-2.10513e-05	-1.49169	1.07804	-1.96036	1.78954	1.24622	9.73468	69.3635	5.1527e-07	6.19034e-05	AF274950	chromosome 12 open reading frame 11	C12orf11	55726	0.00169969
221696_s_at	0.00442887	0.00621782	0.0029733	-0.00423775	0.00180737	-0.00169765	0.000866532	0.0039945	-0.00215138	-0.00140224	-0.00114999	-0.882367	-0.529285	-1.05395	-0.251128	1.92885	5.97793	51.3805	1.94275e-06	0.000117708	AF251059	serine/threonine/tyrosine kinase 1	STYK1	55359	-0.0029733
221748_s_at	-0.00577143	-0.00327573	-0.000822078	0.00304688	-0.00276701	0.00290267	0.000519817	-0.000383074	-0.00111344	-0.00121017	-9.99592e-05	2.00483	0.2147	2.60016	-1.2031	-3.00777	7.664	76.5239	3.32675e-07	5.04677e-05	AL046979	tensin 1	TNS1	7145	0.000822078
221770_at	0.00624028	0.000595424	-0.00113131	-0.00125837	0.00227569	-0.000811105	-0.00235503	0.00104018	-0.00189991	-0.000592375	-0.0010943	-1.07388	0.444098	-1.50163	1.21764	1.11518	7.20101	54.2138	1.53399e-06	0.000104846	BE964473	ribulose-5-phosphate-3-epimerase	RPE	6120	0.00113131
221868_at	0.000928801	-0.0100407	-0.00304705	0.000402503	-2.81624e-05	0.00135073	-0.00104938	0.00270881	0.00161181	-0.000134616	-0.000640767	-0.480727	1.92688	0.0665172	1.54224	-1.23407	6.25606	50.0483	2.18041e-06	0.000123002	AB032981	poly(A) binding protein interacting protein 2B	PAIP2B	400961	0.00304705
221870_at	-0.00594928	-0.00202273	-0.00166272	0.00270654	-0.0037834	0.00136476	-0.000656784	0.00046277	0.000198257	-0.00185598	-0.000686899	1.11232	-0.0185085	1.0379	-0.728463	-1.31244	7.77356	50.1389	2.16317e-06	0.000122867	AI417917	EH-domain containing 2	EHD2	30846	0.00166272
221908_at	0.00471078	-0.00663165	0.00224771	0.00185249	0.00056605	0.000703125	0.00110094	0.0025124	-0.00289326	-0.00139695	0.00111692	-1.30895	1.08517	-0.0164091	1.44787	-0.00707864	7.14807	50.9321	2.01905e-06	0.000119207	AL120375	ring finger protein, transmembrane 2	RNFT2	84900	-0.00224771
221919_at	0.00593859	-0.00259118	0.00236476	-0.000890891	0.00186503	-0.00247781	0.000204369	0.00315468	-0.00165179	-0.000124042	-9.84886e-05	-2.05002	0.965996	-0.830505	1.79722	1.08354	7.27627	73.946	3.87585e-07	5.54114e-05	AW450929	hypothetical LOC100506653	LOC100506653	100506653	-0.00236476
222040_at	0.00506502	-0.00553119	0.000520694	0.00203491	0.00445432	-0.00148305	0.00196906	-0.0001303	-0.000903577	0.000675004	0.000490335	-1.60492	0.612569	-0.43482	2.28819	0.165151	7.53009	61.807	8.59688e-07	7.8947e-05	AI144007	heterogeneous nuclear ribonucleoprotein A1	HNRNPA1	100506653	-0.000520694
222164_at	0.00332201	-0.00749347	-0.00180319	0.00638741	0.00284708	-0.000595239	0.000683477	0.00245899	-0.000297967	-0.00169509	-0.000147553	-1.22116	0.563339	-0.101374	2.92504	-0.849062	6.99286	71.5244	4.49536e-07	5.76028e-05	AU145411	fibroblast growth factor receptor 1	FGFR1	2260	0.00180319
222310_at	0.00316262	-0.00822693	0.00305313	0.00393657	0.000584676	0.00077936	0.00309716	0.000105738	-0.00346921	0.000295447	0.000165589	-1.77003	1.33048	0.790511	2.13281	-0.622348	6.42998	50.0194	2.18595e-06	0.000123073	AA648521	splicing factor, arginine/serine-rich 15	SFRS15	57466	-0.00305313
222325_at	0.00243244	-0.00935189	-0.0022788	0.00212424	0.00130105	0.000285926	-0.00222401	0.00191415	-0.000504672	-0.000883027	0.000722366	-1.4514	2.8969	-0.209118	3.50077	-1.70866	5.09348	107.08	7.38367e-08	2.13357e-05	AW974812	---	---		0.0022788
222360_at	0.00611305	-0.0023084	0.000366004	-0.00266535	-0.000343361	0.00118629	-0.00190948	0.00092102	-0.000311636	-0.000515385	-0.000333775	-1.57242	1.7706	-1.30086	1.35886	0.94356	6.17503	67.7453	5.72274e-07	6.49818e-05	AI291720	DPH5 homolog (S. cerevisiae)	DPH5	51611	-0.000366004
222366_at	-0.001494	-0.00914881	0.00470279	-0.00170886	-0.00378361	0.00120212	0.000888613	-0.000631248	0.000197282	-0.00252031	0.00101674	-0.878917	2.7706	1.97225	0.210929	-1.50007	6.30588	52.4827	1.7696e-06	0.000111205	W86781	---	---		-0.00470279
222371_at	0.00181392	-0.00942079	-0.0026424	0.00397631	-0.000675454	0.000913121	-0.00226834	0.000364898	-0.000638528	0.00242975	0.000316936	-0.721418	1.81902	0.0533312	2.16218	-1.36193	5.95277	49.3533	2.31843e-06	0.000127253	AI732802	---	---		0.0026424
222376_at	0.000989353	-0.00806824	-0.00728249	0.00354337	0.00351081	-0.000154681	-0.000420151	0.000836806	0.000839062	-0.00103455	-0.00151231	-0.00699694	0.615329	-0.413854	1.67078	-1.03606	6.0904	51.3634	1.94559e-06	0.000117708	AV704017	---	---		0.00728249
222399_s_at	0.00435835	0.00626813	-0.00386654	-0.00460834	0.000558164	-0.000448616	-0.00197815	0.0010021	0.00189156	0.000695779	-0.00049703	-0.109012	-0.0864085	-2.0072	0.0157725	1.46543	9.65047	58.1519	1.12577e-06	8.94789e-05	BG104571	transmembrane 9 superfamily member 3	TM9SF3	56889	0.00386654
222477_s_at	0.00607188	0.000234137	-0.00184186	-0.00202805	0.00415303	0.000428806	0.00115288	0.00140217	0.00065138	0.00159561	-0.000404103	-1.14582	0.375517	-1.6377	1.45022	1.14563	9.30466	57.515	1.18189e-06	9.27394e-05	BC005176	transmembrane 7 superfamily member 3	TM7SF3	51768	0.00184186
222558_at	0.00584103	0.0032524	-0.00252866	-0.00136778	0.00212978	-0.000369926	-0.00249506	0.0012542	0.000284378	0.00039118	0.000600789	-0.918381	0.00562418	-2.36828	1.15958	1.72231	6.22349	60.0691	9.75367e-07	8.47896e-05	T79568	regulation of nuclear pre-mRNA domain containing 1A	RPRD1A	55197	0.00252866
222586_s_at	0.00485541	0.00505719	0.00371813	-0.00329397	0.00349063	0.000302931	-0.000832814	0.00378823	0.00285276	0.00142318	-0.000474533	-1.44129	-0.504059	-1.32573	0.0392211	2.46698	6.99235	56.1698	1.31206e-06	9.77691e-05	AI884890	oxysterol binding protein-like 11	OSBPL11	114885	-0.00371813
222606_at	0.00532555	-0.00515464	0.00245627	-0.00185392	0.000559918	0.00281736	-0.000108762	0.000918249	4.51668e-05	0.000464665	0.000939439	-1.93893	2.16907	-0.521092	1.61196	0.488661	9.00525	75.6826	3.49488e-07	5.15853e-05	AA824298	Zwilch, kinetochore associated, homolog (Drosophila)	ZWILCH	55055	-0.00245627
222661_at	-0.00168825	0.00585071	0.0045252	-0.00920576	-0.00570682	0.00355314	-0.00158646	-0.00181486	0.00188927	-0.000400821	0.000436543	0.391471	1.0974	0.13992	-2.97319	1.13157	7.43855	117.557	4.84969e-08	1.8266e-05	AA528017	angiogenic factor with G patch and FHA domains 1	AGGF1	55109	-0.0045252
222670_s_at	-0.00287632	-0.00448476	-0.00572343	0.00979438	0.00285955	-0.00138266	0.00165108	-4.39158e-06	0.00151435	-0.000235575	-0.000438895	0.719658	-1.04742	0.464306	1.13036	-1.43363	7.30495	63.5345	7.60841e-07	7.50359e-05	AW135013	v-maf musculoaponeurotic fibrosarcoma oncogene homolog B (avian)	MAFB	9935	0.00572343
222689_at	0.00581625	0.00174726	0.00171953	-0.00465035	0.00163504	0.000390044	0.000286584	0.00452304	-0.00032887	0.000154455	-0.000646958	-1.22859	0.653976	-1.16523	0.550319	1.42054	6.07656	63.4766	7.6392e-07	7.50359e-05	N51263	alkaline ceramidase 3	ACER3	55331	-0.00171953
222703_s_at	0.0049693	0.00424387	-0.00288566	0.00190916	0.00654264	-0.00157773	0.00250398	0.00201372	0.00136708	-0.00127602	0.000291295	-0.547724	-1.4646	-1.53902	1.20106	1.26123	7.50168	49.3252	2.32424e-06	0.000127342	BE464161	yrdC domain containing (E. coli)	YRDC	79693	0.00288566
222760_at	-0.00452395	-0.00369907	0.00518332	0.00689847	-0.000397888	8.86822e-05	0.00366675	-0.00101135	0.00141221	-0.00049358	0.000481443	0.16561	-0.86336	2.34019	-0.269666	-1.25817	6.7371	74.4857	3.75225e-07	5.4685e-05	BG290193	zinc finger protein 703	ZNF703	80139	-0.00518332
222772_at	0.00619731	-0.000476585	0.00107304	-0.00091628	0.00317998	-0.00219419	0.00073096	0.00179965	-0.000411736	0.000121816	-0.000351646	-1.86103	0.352508	-1.35409	1.7733	1.46406	6.45143	116.467	5.05771e-08	1.84718e-05	BG179854	myelin expression factor 2	MYEF2	50804	-0.00107304
222781_s_at	0.00575771	-0.00154205	0.00124581	-0.00033426	0.00656063	-0.00176596	0.000450203	0.00196581	-0.00110672	-0.00042417	0.000279052	-1.39637	0.0237798	-0.851295	1.57156	0.908261	7.75081	54.8045	1.46246e-06	0.000103253	BF590861	chromosome 9 open reading frame 40	C9orf40	55071	-0.00124581
222815_at	0.00450048	0.00279485	-0.000972623	0.00637872	0.0067912	-0.00479185	0.00408557	0.00168592	-0.000320997	0.00100767	0.000612429	-0.807	-2.36299	-0.880904	1.71212	1.04052	5.97092	50.8798	2.02818e-06	0.000119359	BE966018	ring finger protein, LIM domain interacting	RLIM	51132	0.000972623
222819_at	0.00538043	-0.00523209	-0.00199484	3.16972e-05	0.00282271	-0.000452647	-0.00046698	-0.000500941	-0.00021785	0.000461939	0.000698126	-1.03413	0.999059	-0.837408	1.69088	0.132124	7.87942	50.2805	2.13655e-06	0.000122181	AK025654	CTP synthase II	CTPS2	56474	0.00199484
222906_at	0.00577217	-0.0038109	0.00169244	-0.00271428	-0.000224212	0.00104331	-0.00205422	-0.00073824	-0.000274463	0.000556799	0.000444739	-2.44286	2.87218	-1.27882	1.95542	1.0344	7.46168	59.8439	9.91705e-07	8.5262e-05	AK001419	feline leukemia virus subgroup C cellular receptor 1	FLVCR1	28982	-0.00169244
222921_s_at	-0.00103541	-0.00923826	-0.00473318	0.00396814	-0.0008695	0.00141335	0.000564329	0.000598278	-0.000878875	-0.00360652	-0.000767653	0.121628	1.52182	0.457225	1.79767	-2.13216	6.46478	89.3401	1.66498e-07	3.34299e-05	AF232238	hairy/enhancer-of-split related with YRPW motif 2	HEY2	23493	0.00473318
222940_at	-0.00317898	-0.00296125	0.00968672	0.00375905	-0.00157544	-0.00131562	0.00593827	-0.000904757	-0.000306105	-0.000547198	-0.000375732	-1.05115	-1.01709	5.02811	-1.27024	-1.11507	4.40813	303.127	6.58606e-10	3.59684e-06	U55764	sulfotransferase family 1E, estrogen-preferring, member 1	SULT1E1	6783	-0.00968672
222958_s_at	0.00595407	-0.002027	0.000892829	-0.00117758	0.00454528	-0.000291751	0.00292669	0.000550378	-0.000820812	0.000737685	0.000133718	-2.29541	0.710169	-1.37377	2.40481	1.37133	7.63261	50.8093	2.04058e-06	0.000119702	AK000490	DEP domain containing 1	DEPDC1	55635	-0.000892829
222996_s_at	-0.00391251	-0.00504894	-0.00717337	0.00438833	-0.000866944	0.00283122	-0.00111338	-0.00157343	0.000935495	0.00104096	-0.0017682	1.19813	0.339963	0.242834	0.540482	-1.83367	9.32343	67.1762	5.94125e-07	6.60834e-05	BC002490	CXXC finger protein 5	CXXC5	51523	0.00717337
223136_at	0.00357084	0.00313651	0.00752524	-0.00724139	-0.0021108	0.00278534	-0.00276488	0.00305128	-0.000562962	-0.000383904	-0.000769849	-1.12972	1.11375	-0.244075	-0.835001	1.47785	7.34705	50.1045	2.1697e-06	0.000122867	AF151861	androgen-induced 1	AIG1	51390	-0.00752524
223154_at	0.00402924	0.00602409	0.00451453	-0.00590953	-0.00126555	0.000805105	-0.0025847	0.000141422	0.000653384	0.000121416	0.000805825	-0.960979	0.385942	-1.0298	-0.93578	2.14272	8.81091	79.048	2.87825e-07	4.73539e-05	AF212225	mitochondrial ribosomal protein L1	MRPL1	65008	-0.00451453
223211_at	0.00612928	-0.000918463	0.00176633	-0.00221337	0.00196446	-0.00237665	-0.001784	0.0017661	0.000522619	-0.000749734	-0.000878096	-1.50324	0.763347	-1.04049	1.19617	1.145	7.54773	51.8633	1.86448e-06	0.000114927	BC001627	2-hydroxyacyl-CoA lyase 1	HACL1	26061	-0.00176633
223229_at	0.0061952	-0.000943002	0.000859482	0.000719893	0.00312805	-0.000221418	0.00281868	0.000937635	-0.000480794	0.0001293	0.00147571	-2.22591	0.270083	-1.41031	2.34751	1.51108	8.23764	51.1049	1.98923e-06	0.000118645	AB032931	ubiquitin-conjugating enzyme E2T (putative)	UBE2T	29089	-0.000859482
223245_at	0.00557452	-0.00480283	-5.29699e-05	-0.00109156	0.00298502	0.000822208	4.38784e-05	0.000159669	-0.000587016	0.000856823	0.000771465	-1.77203	1.60823	-1.02887	2.17575	0.471362	7.97151	74.88	3.66501e-07	5.36614e-05	AK024285	spermatid perinuclear RNA binding protein	STRBP	55342	5.29699e-05
223255_at	0.00608202	-0.000809257	0.00193821	-0.00362467	0.00161273	-0.000763038	0.000746188	0.00213625	-0.000104687	0.00103418	0.000932931	-1.45974	0.922159	-0.962367	0.979932	1.14065	7.60475	80.2626	2.68879e-07	4.56033e-05	AA642341	G2/M-phase specific E3 ubiquitin protein ligase	G2E3	55632	-0.00193821
223256_at	0.00628626	-0.000344062	-0.000105993	-0.0022624	0.00090064	-0.00114364	0.000858501	0.00232055	-0.000319898	0.000571222	0.000441868	-1.64612	0.945577	-1.59258	1.50146	1.39167	7.5512	55.4984	1.38354e-06	0.000100167	AW007694	G2/M-phase specific E3 ubiquitin protein ligase	G2E3	55632	0.000105993
223257_at	0.00631651	-0.000657753	-0.00081194	-0.00152567	0.000765861	0.00113597	0.000362006	0.00192307	-0.00122364	9.81744e-05	-0.000708667	-2.13993	1.53956	-2.31501	2.20009	1.70336	6.68473	52.786	1.72529e-06	0.000111035	AI823905	G2/M-phase specific E3 ubiquitin protein ligase	G2E3	55632	0.00081194
223258_s_at	0.00630514	0.000665216	0.000785232	-0.000202656	0.00210946	-0.000955336	-2.54991e-05	0.00144565	-0.00120307	0.00245192	-0.000951273	-1.56487	0.232452	-1.38653	1.44019	1.45161	7.01286	50.1768	2.15601e-06	0.00012267	BC000973	G2/M-phase specific E3 ubiquitin protein ligase	G2E3	55632	-0.000785232
223309_x_at	0.00421172	0.00723981	0.00120409	-0.00137683	0.00432979	-0.00189923	0.000601229	0.000352934	0.00284706	0.00143071	-0.00144215	-0.475729	-1.1674	-1.03542	0.0151778	1.54502	8.51171	61.0492	9.07952e-07	8.14371e-05	BG025248	patatin-like phospholipase domain containing 8	PNPLA8	50640	-0.00120409
223381_at	0.00620602	-0.00190582	-0.000258727	-0.000453313	0.00234873	0.00178154	-0.000433414	2.10617e-05	-0.00164605	0.000482162	0.00012337	-2.68907	1.76083	-2.34588	3.04543	1.63576	7.49652	51.0625	1.99649e-06	0.000118645	AF326731	NUF2, NDC80 kinetochore complex component, homolog (S. cerevisiae)	NUF2	83540	0.000258727
223511_at	0.00583253	0.00330495	0.00174336	-0.00100206	0.00351472	0.000579608	0.000352505	0.00240071	0.000509084	-0.0010975	0.000217196	-1.20592	-0.304677	-1.20798	0.750401	1.61253	5.79345	55.7853	1.35243e-06	9.92742e-05	AL512744	chromosome 1 open reading frame 124	C1orf124	83932	-0.00174336
223513_at	0.00582248	0.00217849	0.00378515	-0.00218534	0.00159862	0.00164292	0.00149955	0.00272545	-0.000251843	-0.000147908	0.000837735	-2.55352	0.493535	-1.45411	0.940352	2.73152	8.02576	58.3814	1.10635e-06	8.93805e-05	AF139625	centromere protein J	CENPJ	55835	-0.00378515
223599_at	0.00450451	-0.00713945	-0.00103406	-0.000522851	0.000862629	0.00335052	0.00149645	0.00129694	-0.00107247	6.02243e-05	0.00084725	-1.57361	2.3384	-0.653385	2.23238	-0.258516	7.87195	49.4487	2.29887e-06	0.000126615	AF220030	tripartite motif-containing 6	TRIM6	117854	0.00103406
223629_at	0.00204846	-0.00961475	-0.00245156	0.00191506	-0.000668835	0.001816	-0.000680357	0.00207738	-0.000454648	-0.0011414	-0.000508235	-1.18398	3.03635	-0.0100213	2.86398	-1.73077	5.68633	238.235	1.97422e-09	4.63466e-06	BC001186	protocadherin beta 5	PCDHB5	26167	0.00245156
223642_at	0.0036374	-0.00744483	-0.00471999	0.00253826	0.00261815	-8.9322e-05	-0.000342609	-0.00168961	-0.00160802	-0.000119484	-0.000262024	-1.56201	2.45333	-1.63969	4.902	-1.43064	5.24596	66.7994	6.09158e-07	6.68031e-05	AF193855	Zic family member 2 (odd-paired homolog, Drosophila)	ZIC2	7546	0.00471999
223651_x_at	0.00567283	0.0040162	0.0022897	-0.00204886	0.00276352	-0.000188799	-0.000418875	-0.000337464	-0.000425429	-5.46114e-05	-3.49428e-05	-1.16351	-0.250002	-1.2226	0.460789	1.75472	5.65877	56.7489	1.25399e-06	9.60285e-05	BC005258	cell division cycle 23 homolog (S. cerevisiae)	CDC23	8697	-0.0022897
223707_at	0.00358147	0.00656293	0.00528062	-0.00503908	0.00089074	-0.000864425	0.000822379	0.00453453	-0.000379591	0.000412751	3.86741e-06	-1.34714	-0.62525	-0.924553	-1.10586	2.90917	6.40428	66.2182	6.33258e-07	6.82133e-05	BC004284	ribosomal protein L27a	RPL27A	6157	-0.00528062
223748_at	0.00555329	-0.00315936	0.00308791	-0.00350727	0.000859974	0.000857077	0.000840956	0.00540332	-0.000798337	0.000613222	-0.00100325	-2.21798	1.97549	-0.748922	1.44006	1.09872	7.80903	71.4008	4.53008e-07	5.76028e-05	AF336127	solute carrier family 4, sodium borate transporter, member 11	SLC4A11	83959	-0.00308791
223761_at	0.00257011	-0.00545043	-0.00577297	0.00775002	0.00591919	-0.00107363	0.000325737	0.00183099	-0.00362348	-0.00102368	0.00114677	-0.355225	-0.523532	-0.645231	2.63994	-0.800074	5.60017	62.3156	8.2904e-07	7.80627e-05	AF110400	fibroblast growth factor 19	FGF19	9965	0.00577297
223784_at	0.00277625	-0.00771012	-0.00288023	0.00577599	0.00471117	-0.00115009	0.000821331	0.00236238	-0.00257224	-3.24146e-05	0.000977229	-0.953414	0.35045	-0.180653	2.88342	-0.965249	4.41042	126.04	3.54193e-08	1.58916e-05	AF229179	transmembrane protein 27	TMEM27	57393	0.00288023
223810_at	0.00294559	0.0076222	0.00542882	-0.00431418	0.00234983	-0.000548204	-0.000589916	-0.00195316	-0.000383685	-0.000171298	0.000855018	-0.703263	-0.918229	-0.618785	-1.02023	2.10202	4.17185	56.888	1.24051e-06	9.54504e-05	AF252283	kelch-like 1 (Drosophila)	KLHL1	57626	-0.00542882
223843_at	0.00199558	-0.00683373	-0.00501768	0.00766104	0.00460385	-0.00228214	0.00188538	0.00189809	-0.00124513	-0.000284481	0.000548367	-0.493134	-0.36126	-0.291252	3.0848	-1.24881	5.09671	160.296	1.1941e-08	9.30287e-06	AB007830	scavenger receptor class A, member 3	SCARA3	51435	0.00501768
223908_at	0.00596104	0.00179416	0.00178141	-0.002447	0.00419475	-0.000783251	-0.000928994	-0.000564239	-0.00116039	0.000136168	-0.00105611	-1.29086	0.0888692	-1.21165	0.880372	1.48209	5.35874	55.2891	1.40679e-06	0.000101224	AF212246	histone deacetylase 8	HDAC8	55869	-0.00178141
223977_s_at	0.00316656	-0.00527702	-0.00416431	0.00700695	0.00655117	-0.00361609	0.002308	0.00263565	-0.000615506	-0.000736207	-0.000483214	-0.726092	-0.781046	-0.530511	2.85505	-0.563252	4.53971	136.641	2.45947e-08	1.35676e-05	AF295726	chromosome 18 open reading frame 2	C18orf2	56651	0.00416431
224032_x_at	-0.00470452	-0.00267692	0.00660586	0.00462274	-0.00220462	0.000334585	0.00429922	-0.0018234	7.53017e-05	-0.00189115	-0.00104575	0.0830592	-0.36761	1.55437	-0.519012	-0.650762	5.28716	49.2994	2.32958e-06	0.000127353	AF098306	sperm protein associated with the nucleus, X-linked, family member A1	SPANXA1	30014	-0.00660586
224048_at	0.00592225	-0.00294935	-0.000663258	-0.00267038	0.0019312	0.00127902	-0.00260183	0.00174956	-0.000152573	0.000401849	-0.000572299	-2.60233	2.92959	-2.51644	2.8764	1.38582	6.81868	229.027	2.36218e-09	4.63466e-06	AL136825	ubiquitin specific peptidase 44	USP44	84101	0.000663258
224320_s_at	0.00615906	-0.00101455	0.00101471	-0.0027168	0.00293811	0.000366114	0.000997107	0.000602984	-0.00054458	7.56999e-05	0.00088011	-2.11493	1.17446	-1.61193	1.79889	1.5988	6.11698	89.8618	1.62211e-07	3.26894e-05	BC005170	minichromosome maintenance complex component 8	MCM8	84515	-0.00101471
224344_at	-0.00260795	0.00946562	-0.00110859	-0.00151694	-0.0013293	0.000123475	0.00193504	-0.000171584	1.15469e-05	0.000490594	-0.000121028	3.09044	-4.44801	-0.814105	-4.60786	2.00687	9.2672	54.0882	1.54975e-06	0.000105139	AF020589	cytochrome c oxidase subunit VIa polypeptide 1	COX6A1	1337	0.00110859
224392_s_at	0.0048262	-0.0024744	-0.0019141	0.00607652	0.00597468	-0.00461794	0.00295764	0.00168127	-0.000680988	0.000632249	-0.000861981	-1.13176	-1.08517	-0.751549	2.52127	0.313668	7.04962	67.2668	5.90582e-07	6.58234e-05	AF303588	opsin 3	OPN3	23596	0.0019141
224400_s_at	0.00402061	0.00503901	0.00449826	-0.00759078	-0.000663852	0.00117345	-0.0030423	-0.00122356	-0.000618924	0.000838847	-0.000336942	-1.21417	1.00078	-1.27425	-1.10455	2.46645	5.14145	78.6016	2.95195e-07	4.78934e-05	AF332473	carbohydrate (N-acetylgalactosamine 4-0) sulfotransferase 9	CHST9	83539	-0.00449826
224516_s_at	-0.0027351	-0.0066569	-0.0072817	0.00489696	-0.000269006	0.00216676	-0.000261836	-0.00201086	0.000340473	0.00300216	-9.59755e-05	1.16595	0.712811	0.218058	1.41458	-2.49198	8.59249	78.1999	3.02023e-07	4.80886e-05	BC006428	CXXC finger protein 5	CXXC5	51523	0.0072817
224589_at	-0.00376581	-0.0025836	0.0091054	0.00409384	-0.00200722	-0.00203695	0.00413005	-0.000352056	-0.000739918	0.000112702	-0.000367598	-0.280352	-0.538702	2.24186	-0.676804	-0.583454	3.86269	82.0124	2.4418e-07	4.27416e-05	BF223193	X (inactive)-specific transcript (non-protein coding)	XIST	7503	-0.0091054
224590_at	-0.00357654	-0.00282594	0.0093903	0.00369112	-0.00180113	-0.0029642	0.00378192	0.000299322	0.00143857	0.000758516	-0.000334914	-0.424187	-0.587075	2.66741	-0.757449	-0.65343	3.80717	60.3732	9.53818e-07	8.40175e-05	BE644917	X (inactive)-specific transcript (non-protein coding)	XIST	7503	-0.0093903
224634_at	0.00604726	-0.000926311	0.00405318	-0.00141596	0.000484536	0.000961106	7.7749e-06	0.000538626	3.61697e-05	0.000430527	-0.000688302	-2.22012	1.21085	-0.808914	1.22398	1.5398	7.62872	52.8885	1.71063e-06	0.000110724	AI911518	G patch domain containing 4	GPATCH4	54865	-0.00405318
224646_x_at	-0.00598736	-0.000123079	-0.000415671	0.00490815	-0.00186842	0.000671456	0.0017762	-0.00215697	0.000707668	-0.000198098	-0.000423419	3.83582	-3.19505	4.24916	-2.67812	-3.81817	9.03851	228.351	2.39416e-09	4.63466e-06	BF569051	H19, imprinted maternally expressed transcript (non-protein coding)	H19	283120	0.000415671
224654_at	0.00590958	0.00188681	-0.000634659	-0.00502107	0.000186757	0.00141943	-0.00171376	0.000632208	0.000228884	0.00084902	-0.00050637	-1.2716	1.33432	-2.1016	0.707721	1.75609	10.1457	100.632	9.76183e-08	2.44126e-05	BG164358	DEAD (Asp-Glu-Ala-Asp) box polypeptide 21	DDX21	9188	0.000634659
224772_at	-0.00250141	-0.00699911	-0.0059507	0.00682201	0.000320327	0.00197118	0.00043381	-0.00140017	-0.000638762	-0.00257087	0.0003892	0.927276	0.333456	0.608387	1.74393	-2.60664	6.91142	66.3229	6.28832e-07	6.80047e-05	AB032977	neuron navigator 1	NAV1	89796	0.0059507
224814_at	0.00334606	0.00832197	0.00227795	-0.00166152	0.00325829	-0.00292826	0.0013965	0.000280264	-0.00133871	0.00069489	-0.00346274	-0.318277	-1.18591	-0.693575	-0.296439	1.37359	8.14082	57.0394	1.22604e-06	9.51816e-05	NM_013379	dipeptidyl-peptidase 7	DPP7	29952	-0.00227795
224847_at	0.00381179	0.00771621	0.00295323	-0.00227236	0.00287701	0.000112612	-0.000805069	0.00267815	0.00102082	0.00022402	-0.00125427	-0.795526	-1.37019	-1.32914	-0.538772	2.49753	8.86983	65.104	6.82794e-07	7.1076e-05	AW051349	cyclin-dependent kinase 6	CDK6	1021	-0.00295323
224848_at	0.00343095	0.00716941	0.00612061	-0.00115815	0.00152573	-0.0015227	0.00122404	0.00295968	0.00138035	0.00250264	0.00169922	-1.0087	-1.36987	-0.369302	-0.650842	2.14542	8.2253	50.7662	2.0482e-06	0.000119891	AA922068	cyclin-dependent kinase 6	CDK6	1021	-0.00612061
224873_s_at	0.00580547	-0.00157913	0.00356514	-0.00396397	-0.00142327	0.0023317	-0.000267559	0.000220942	-0.000266314	-0.00115748	0.000321591	-1.73505	1.81558	-0.756517	0.717793	1.15567	5.92559	53.5118	1.62464e-06	0.000107158	AK024433	mitochondrial ribosomal protein S25	MRPS25	64432	-0.00356514
224903_at	0.00587124	-0.000885724	0.00391906	-0.00292073	0.0024155	-0.000444656	-0.00022093	0.00272032	0.000349385	0.001359	0.00120474	-1.41704	0.692998	-0.583103	0.798163	1.04266	9.67147	84.8848	2.09344e-07	3.81097e-05	AL519818	cirrhosis, autosomal recessive 1A (cirhin)	CIRH1A	84916	-0.00391906
224997_x_at	-0.00622376	0.00029022	-0.00148102	0.00243917	-0.00120159	8.72592e-05	0.00145152	-0.00258065	0.000261907	-0.000433105	0.000173775	3.95932	-2.46561	3.15622	-2.88762	-3.31652	7.61159	197.828	4.59722e-09	6.12362e-06	AL575306	H19, imprinted maternally expressed transcript (non-protein coding)	H19	283120	0.00148102
225039_at	0.00605604	0.00095496	-0.00329926	-0.00144139	0.0018454	0.000880619	-0.00213369	0.00201602	-0.000276619	0.000713749	-0.000502424	-0.90565	0.608227	-2.00054	1.35765	1.1315	7.8104	62.1482	8.38979e-07	7.81055e-05	AV699857	ribulose-5-phosphate-3-epimerase	RPE	6120	0.00329926
225143_at	0.00431398	0.00356451	0.0081739	-0.00309387	0.00225679	-0.000837847	0.000511056	0.000685218	0.00125804	-0.000409525	-0.00137978	-1.74534	-0.251411	-0.0886933	-0.282897	2.07687	8.04884	94.5935	1.28876e-07	2.78194e-05	AW182455	sideroflexin 4	SFXN4	119559	-0.0081739
225173_at	-0.000310237	0.00894211	0.00560984	-0.00420506	-0.00216342	0.00130711	-4.2449e-05	0.00124468	0.00308016	0.0014002	0.000185034	0.0768865	-0.907143	0.0389155	-2.18464	1.65598	7.37518	51.8191	1.87149e-06	0.000115228	BE501862	Rho GTPase activating protein 18	ARHGAP18	93663	-0.00560984
225291_at	0.00620262	5.06287e-05	0.00174385	-0.00214435	0.00155516	0.00220542	-0.000252893	0.00204101	0.000354943	0.000379827	0.00154347	-2.22274	1.30418	-1.69922	1.51974	1.90767	8.6936	66.0548	6.40243e-07	6.86946e-05	AI967971	polyribonucleotide nucleotidyltransferase 1	PNPT1	87178	-0.00174385
225492_at	0.00581481	0.00153734	0.00126841	-0.00437349	0.0021928	0.0018848	-0.0038026	0.00241013	-0.000660958	0.000532821	-0.000808563	-1.06029	0.808432	-1.25707	0.538575	1.26981	9.23265	49.7191	2.24451e-06	0.000124826	BG500396	transmembrane protein 33	TMEM33	55161	-0.00126841
225496_s_at	-0.000353357	-0.00895799	-0.00250106	0.00685662	0.00150381	-3.90878e-05	0.00375912	0.00218633	0.000977313	0.000491904	-0.000538436	-0.288125	0.36224	0.723038	1.78721	-1.50612	6.28951	60.6552	9.34345e-07	8.27024e-05	N21426	synaptotagmin-like 2	SYTL2	54843	0.00250106
225540_at	0.00034006	0.00774008	0.00832496	-0.0018381	0.00030203	-0.00342026	0.00305321	0.00131555	0.00182026	0.000303429	0.000688095	-0.680975	-2.34956	0.872392	-2.16715	2.32733	7.23257	97.5123	1.12446e-07	2.64699e-05	BF342661	microtubule-associated protein 2	MAP2	4133	-0.00832496
225619_at	0.00563752	0.00321359	0.00250126	-0.00424759	0.00184255	0.00183567	0.000337902	0.00153818	-0.000966011	-3.41036e-05	1.42648e-05	-2.12763	0.710958	-2.06854	0.521715	2.92186	6.73439	90.628	1.56156e-07	3.17032e-05	AV730849	SLAIN motif family, member 1	SLAIN1	122060	-0.00250126
225660_at	0.00219161	-0.00964401	0.000219569	-0.00123252	-0.000390551	0.00286057	7.77933e-06	0.00277365	0.00147813	0.00249532	0.000131886	-1.63628	3.67148	0.312445	2.24142	-1.29012	8.98583	60.6783	9.32777e-07	8.26977e-05	W92748	sema domain, transmembrane domain (TM), and cytoplasmic domain, (semaphorin) 6A	SEMA6A	57556	-0.000219569
225694_at	0.00610145	-0.000211475	-0.00019893	-0.00428006	0.00173181	-0.00032896	-0.00191873	0.000281261	-0.000778917	-0.000131671	9.87459e-05	-1.20456	1.06791	-1.43597	0.985462	1.14893	7.47923	75.6905	3.49324e-07	5.15853e-05	AI823766	cyclin-dependent kinase 12	CDK12	51755	0.00019893
225712_at	0.00578147	0.00333686	-0.000247966	-0.00425477	0.000422935	0.00140153	-0.00169959	-8.55334e-06	2.88891e-05	0.000920217	-0.00072292	-1.03175	0.70967	-1.84978	0.438915	1.73577	7.94683	59.6742	1.00424e-06	8.55609e-05	AW024563	gem (nuclear organelle) associated protein 5	GEMIN5	25929	0.000247966
225716_at	0.00563746	0.00127249	0.00432879	-0.00229525	0.00429786	-0.00140724	0.00250464	0.00150787	-0.000718713	4.35692e-05	0.000609254	-2.53978	-0.138266	-1.02375	1.26999	2.42171	7.92863	119.088	4.57502e-08	1.77203e-05	AI357639	---	---		-0.00432879
225726_s_at	0.00479711	-0.00497807	0.00477731	-0.00262442	0.000592439	0.000913012	0.000561059	0.00553929	-0.00265976	-0.000466565	0.000744984	-1.89842	1.7629	-0.0231117	1.16735	0.547963	7.24745	53.615	1.6109e-06	0.000106655	AB033026	pleckstrin homology domain containing, family H (with MyTH4 domain) member 1	PLEKHH1	57475	-0.00477731
225734_at	0.00628796	0.000243186	-0.000784948	-0.00222204	0.00137689	0.000618984	-0.000957524	0.00177579	-9.01091e-05	-6.97477e-05	-0.000346493	-1.57134	1.04592	-1.96971	1.5239	1.51991	7.53919	92.349	1.4353e-07	2.98045e-05	AW294765	F-box protein 22	FBXO22	26263	0.000784948
225805_at	0.00619963	-0.000589776	-0.001999	-0.000587322	0.00316515	0.00114474	-0.000470606	-0.000225576	-0.000874186	-0.000614167	0.000879158	-1.34899	0.664085	-1.86144	1.86614	1.12449	6.88129	50.2615	2.14009e-06	0.000122256	AW137669	heterogeneous nuclear ribonucleoprotein U (scaffold attachment factor A)	HNRNPU	3192	0.001999
225816_at	0.00552443	-0.00512451	-0.000620463	-0.000956525	-0.000422338	0.0012158	-0.0022429	0.000319312	-0.000685876	0.000755891	-0.00162938	-1.8944	2.59757	-1.293	2.29781	0.358674	8.13861	63.2904	7.73936e-07	7.57472e-05	AW138134	PHD finger protein 17	PHF17	79960	0.000620463
225826_at	0.00486675	0.00501661	-4.1333e-05	0.00177521	0.0068195	-0.00149249	0.000549149	0.00303613	-0.00222511	-0.000209356	-0.00101553	-0.636926	-1.351	-1.07671	0.771479	1.29075	7.42258	51.3465	1.9484e-06	0.000117708	AV702487	methylmalonic aciduria (cobalamin deficiency) cblB type	MMAB	326625	4.1333e-05
225834_at	0.0059929	-0.00287513	-0.00204933	-0.000853016	0.00270917	0.000585569	0.000251187	0.000394366	-0.000705539	2.52139e-05	-0.000744863	-2.71859	2.17651	-2.93552	3.92941	1.3305	8.4206	106.423	7.59079e-08	2.14586e-05	AL135396	family with sequence similarity 72, member A	FAM72A	554282	0.00204933
225837_at	0.0059051	-0.002484	-0.0017685	0.00159612	0.00407963	-0.00154744	0.00147054	0.000717238	-0.000443715	9.32999e-05	-0.000716463	-1.6571	0.27861	-1.52395	2.67738	0.795282	7.7691	85.41	2.03647e-07	3.77009e-05	AL577977	chromosome 12 open reading frame 32	C12orf32	83695	0.0017685
225887_at	0.0061657	-0.00192078	-0.0019935	-0.00125395	0.00178549	0.000840905	0.000401194	0.000556874	-0.000639551	0.00091165	7.97593e-05	-2.14457	1.75315	-2.53835	2.8439	1.35649	7.67567	68.6955	5.37923e-07	6.3042e-05	AL522406	chromosome 13 open reading frame 23	C13orf23	80209	0.0019935
225904_at	0.00544568	-0.00497916	-0.00201548	-0.00235638	0.000619476	2.66404e-05	-0.00151768	-0.00105823	-0.00165076	0.00122503	0.000140176	-1.59914	2.4	-1.5385	2.22985	0.338244	7.75029	51.0246	2.00302e-06	0.000118645	N64686	chromosome 1 open reading frame 96	C1orf96	126731	0.00201548
225944_at	0.00560854	-0.00230635	0.00102321	-0.00566147	-0.00145113	0.002161	-0.00330479	-0.000697529	-0.00239667	5.10823e-05	0.000593526	-1.63567	2.69468	-1.40867	0.90884	1.07067	6.81455	61.6387	8.7013e-07	7.94655e-05	AW006938	neurolysin (metallopeptidase M3 family)	NLN	57486	-0.00102321
225958_at	0.00416577	-0.00744118	-0.00311227	0.00201822	0.00112807	0.00116451	-0.000474049	0.000868459	-0.00112208	0.00019171	0.000223722	-1.73443	2.60446	-1.15612	3.73631	-0.853839	8.78359	142.731	2.0194e-08	1.2812e-05	AI554106	polyhomeotic homolog 1 (Drosophila)	PHC1	1911	0.00311227
225978_at	0.00600681	-0.00119957	0.00082387	-0.00458386	0.000650776	0.000769943	-0.00244617	-0.00073879	0.00135702	0.00132452	0.00104085	-1.32874	1.49912	-1.24958	0.908605	1.05635	6.36646	52.5063	1.76612e-06	0.000111205	AW409794	ribosomal modification protein rimK-like family member B	RIMKLB	57494	-0.00082387
226005_at	0.00525973	-0.00370668	0.000756492	-0.0057336	-0.000552923	0.0029549	-0.00409813	-0.000249051	-0.0014719	0.00120446	-0.00202489	-1.24702	2.29699	-1.00696	0.844058	0.589956	8.39829	50.6405	2.07063e-06	0.000120651	BG170762	ubiquitin-conjugating enzyme E2G 1 (UBC7 homolog, yeast)	UBE2G1	7326	-0.000756492
226020_s_at	0.00580711	-0.00261422	0.0019509	-0.000666225	0.0037493	-0.000183925	-0.00174273	0.0047829	-0.000889562	-0.00128218	0.000699462	-1.66337	0.814371	-0.834708	1.60939	0.875461	7.50239	55.5568	1.37713e-06	0.000100146	AI927931	disabled homolog 1 (Drosophila)	DAB1	115209	-0.0019509
226029_at	0.00418475	-0.00736219	-0.003437	0.0012901	-0.000835218	0.000122572	-0.00215673	0.000923864	-0.0009616	-0.000872252	-0.000696166	-1.07046	2.06526	-0.884147	2.29364	-0.557621	7.69314	52.4214	1.77874e-06	0.000111205	AB033041	vang-like 2 (van gogh, Drosophila)	VANGL2	57216	0.003437
226030_at	0.00501358	0.00551981	0.00303516	-0.0030126	0.00193986	-0.00111322	-0.00141713	0.00172876	0.000435043	0.00130222	0.000601767	-1.0861	-0.426474	-1.24208	-0.0122229	2.06446	6.26534	88.059	1.77624e-07	3.51471e-05	BE897866	acyl-CoA dehydrogenase, short/branched chain	ACADSB	36	-0.00303516
226035_at	0.00581453	-0.0035925	0.000889314	-0.00210542	0.0013182	-0.000323362	0.00203091	0.0037159	1.10741e-05	0.00103554	0.00255704	-1.40349	1.13084	-0.714826	1.35105	0.602396	8.13436	51.5751	1.91073e-06	0.000116723	AA102581	ubiquitin specific peptidase 31	USP31	57478	-0.000889314
226105_at	0.00597706	-0.00188452	-0.00234815	-0.00349077	0.00126372	0.00160747	-0.000199538	0.00162044	-0.00141068	0.000788754	-8.36771e-05	-1.19167	1.48704	-1.64817	1.44627	0.830587	7.27972	70.8417	4.69139e-07	5.819e-05	AI672489	core 1 synthase, glycoprotein-N-acetylgalactosamine 3-beta-galactosyltransferase, 1	C1GALT1	56913	0.00234815
226113_at	-0.00351609	0.00665172	0.00645984	-0.00135478	-0.00207847	0.00146027	0.00374595	-0.00225022	0.00132564	-0.00026747	0.000995341	0.572143	-1.52617	1.41611	-2.61862	0.738253	7.14634	59.0534	1.05178e-06	8.74286e-05	AB051497	zinc finger protein 436	ZNF436	80818	-0.00645984
226116_at	0.00594177	-0.00176483	0.000329566	-0.00501116	-0.00138531	0.000516925	-0.000878383	0.00078775	0.00045838	0.000330731	0.000799069	-1.1637	1.57324	-1.064	0.778536	0.829592	9.0909	49.831	2.22247e-06	0.000123979	BF064224	DNA fragmentation factor, 45kDa, alpha polypeptide	DFFA	1676	-0.000329566
226132_s_at	0.00193613	-0.00747872	-0.00552083	0.0053398	0.00562308	-0.000529517	9.61728e-05	0.00246866	-0.000844864	0.000152718	0.000197034	-0.39461	0.252389	-0.471368	2.62522	-1.12542	5.38749	74.3046	3.79318e-07	5.47474e-05	AW272422	mannosidase, endo-alpha-like	MANEAL	149175	0.00552083
226145_s_at	0.00322678	-0.00182852	0.00961787	-0.00489987	-0.00387186	0.000632474	0.00249974	0.00456383	0.000486772	1.63051e-05	-0.000629159	-2.19333	2.00008	0.935306	-0.41541	1.18004	9.19407	55.0035	1.43927e-06	0.000102374	AL157471	Fraser syndrome 1	FRAS1	80144	-0.00961787
226202_at	0.0046491	-0.00547702	-0.00436643	0.00225794	0.00459359	0.000180026	-0.0016067	-0.000283055	-0.000222709	0.000665215	0.000332543	-1.23205	1.10945	-1.62911	3.3199	-0.264955	7.45969	78.0046	3.05412e-07	4.84868e-05	AI761824	zinc finger protein 398	ZNF398	57541	0.00436643
226291_at	0.00628155	-0.00103626	0.000168888	-0.000384158	0.00224706	-6.60481e-05	0.000321128	0.00269803	2.53638e-05	0.00111013	-0.000261729	-1.07743	0.445104	-0.892333	1.13784	0.765388	7.45729	52.6411	1.7463e-06	0.000111079	AB046783	amyotrophic lateral sclerosis 2 (juvenile)	ALS2	57679	-0.000168888
226350_at	0.00551206	-0.000668906	0.0047435	-0.00389452	-0.000953855	0.00298907	-6.47215e-05	0.0048851	0.000928027	-1.05636e-05	-0.000316317	-2.36192	2.07287	-0.785836	0.678072	1.7428	9.09227	50.0974	2.17104e-06	0.000122867	AU155565	choroideremia-like (Rab escort protein 2)	CHML	1122	-0.0047435
226364_at	0.00535634	-0.00523252	-0.00263887	-0.00065985	0.000970323	-0.000125983	-0.00232046	6.23791e-06	-0.000413424	-0.00132629	-0.000786334	-1.23063	1.72881	-1.25353	2.03911	0.130639	7.60033	62.1606	8.38237e-07	7.81055e-05	AU145049	huntingtin interacting protein 1	HIP1	3092	0.00263887
226374_at	0.00439779	-0.00522725	-0.00594703	-0.00183831	0.000389252	0.00211751	-0.0050172	-0.00104533	-0.00159512	0.000479143	-0.000549443	-0.547666	1.97118	-1.55265	1.6788	-0.193493	9.85567	53.1867	1.66882e-06	0.000109399	BG260087	coxsackie virus and adenovirus receptor	CXADR	1525	0.00594703
226415_at	-0.000837655	-0.00975838	-0.00256766	0.00370574	-0.00168624	0.000754783	0.00274211	7.35859e-05	0.000238157	0.003281	-0.000375427	-0.303927	2.10091	1.15417	2.19284	-2.62772	6.58918	62.5147	8.17404e-07	7.75015e-05	AA156723	vesicle amine transport protein 1 homolog (T. californica)-like	VAT1L	57687	0.00256766
226478_at	0.00596017	-0.000706242	-0.00179322	-0.00148094	0.00329824	-0.000970777	-0.00178465	0.00575219	-0.00111768	-0.000586635	-9.55339e-05	-1.74669	0.879768	-2.33097	2.32711	1.456	7.05564	66.0827	6.39041e-07	6.86946e-05	BF540749	transmembrane 7 superfamily member 3	TM7SF3	51768	0.00179322
226548_at	0.00343999	-0.00885169	0.000122445	-0.00024795	0.00109279	0.000583096	-0.000446909	0.00102979	-0.00107775	0.00129164	4.70316e-05	-0.969487	1.49868	-0.0516485	1.38836	-0.421215	7.93326	52.8842	1.71124e-06	0.000110724	AI935915	SH3-binding domain kinase 1	SBK1	388228	-0.000122445
226549_at	0.00296636	-0.00925739	0.00099866	-0.000223592	0.000148642	0.00164136	-0.000427018	0.00141277	-0.000559679	0.000262114	0.000696054	-0.92041	1.55113	0.129965	1.18499	-0.473272	7.23702	59.451	1.02102e-06	8.63175e-05	BF447901	SH3-binding domain kinase 1	SBK1	388228	-0.00099866
226587_at	0.00364124	-0.0083182	0.00077143	-0.00105621	-0.00145953	0.00330434	-0.000957913	0.00200738	-0.00176627	-0.000334123	-0.00038949	-2.2129	4.13173	-0.169509	2.50098	-0.718659	8.371	169.225	9.33971e-09	8.3618e-06	BE783065	small nuclear ribonucleoprotein polypeptide N	SNRPN	6638	-0.00077143
226612_at	-0.000485421	-0.00933193	0.00097215	0.00631374	0.000618453	-0.000310975	0.00381967	0.00224942	-0.000751996	0.000353533	-0.00110552	-0.710794	0.624782	1.44421	1.7624	-1.63521	5.92031	110.046	6.52952e-08	2.02965e-05	H17038	ubiquitin-conjugating enzyme E2Q family-like 1	UBE2QL1	134111	-0.00097215
226653_at	0.00619859	-0.00153302	-0.000226698	-0.00093421	0.00300177	-0.00143218	0.000860042	0.0012427	-0.000884355	-0.000206519	0.00103619	-1.50224	0.597869	-1.26631	1.71126	1.00631	5.57285	85.7616	1.99937e-07	3.73944e-05	AB040910	MAP/microtubule affinity-regulating kinase 1	MARK1	4139	0.000226698
226733_at	0.00414479	-0.00737015	-0.00338801	0.00076911	0.00259118	-7.50313e-05	0.0014144	-4.82039e-06	-0.00136273	8.51667e-05	0.000628843	-1.22836	1.65176	-0.869915	2.68442	-0.531903	6.20379	58.4497	1.10065e-06	8.9302e-05	AA587884	6-phosphofructo-2-kinase/fructose-2,6-biphosphatase 2	PFKFB2	5208	0.00338801
226811_at	0.000490695	-0.00749465	-0.00203614	0.00942335	0.00462689	4.50539e-05	0.00324083	0.00127658	-0.00158482	-0.000312784	-0.000946123	-0.537855	-0.617994	0.784978	2.74351	-1.60847	6.11322	62.6129	8.11739e-07	7.70983e-05	AL046017	family with sequence similarity 46, member C	FAM46C	54855	0.00203614
226848_at	0.00548351	-0.00337641	0.0049414	-0.000544373	0.000388161	-0.000179575	0.00248715	0.00278378	-0.00144753	0.000583353	0.000242308	-1.78917	0.981682	-0.0754173	1.14407	0.74951	7.05453	68.4057	5.48128e-07	6.39635e-05	AI571166	---	---		-0.0049414
226914_at	0.00621487	-0.00159452	-0.000351167	-0.000764993	0.00217827	0.000586542	-0.00123077	0.00284551	-0.000515549	0.0011237	-5.60457e-05	-1.02372	0.646158	-0.949352	1.14854	0.675543	7.76295	56.0355	1.32598e-06	9.83864e-05	AU158936	actin related protein 2/3 complex, subunit 5-like	ARPC5L	81873	0.000351167
226943_at	0.0052849	0.00528469	0.0011169	-0.00121798	0.00368407	-0.00126772	0.000280662	0.00196477	-0.000270716	0.000228545	0.00110591	-1.03415	-0.94625	-1.50908	0.524207	2.00614	7.49434	112.011	6.02946e-08	1.96018e-05	AA287457	chromosome 12 open reading frame 73	C12orf73	728568	-0.0011169
226980_at	0.00593627	-0.0022484	0.00112434	-0.0036676	0.00221832	0.000574216	-0.00269118	0.000810039	-0.000818972	0.000662658	0.000560021	-2.54362	2.46611	-1.96165	2.09896	1.63004	6.8282	97.6928	1.11517e-07	2.63648e-05	AK001166	DEP domain containing 1B	DEPDC1B	55789	-0.00112434
227037_at	0.00219657	0.00879175	0.00468909	-0.00260817	0.00200313	-0.000808567	0.00269863	0.00183727	-0.00105205	0.00054825	0.000534526	-0.467502	-1.62833	-0.473228	-1.10039	2.05936	7.28823	70.7804	4.7095e-07	5.819e-05	AA029500	phospholipase D family, member 6	PLD6	201164	-0.00468909
227094_at	0.00584809	-0.00262976	-0.00241363	-0.00332162	0.00206984	0.000934117	2.1928e-05	0.00263426	-9.68874e-05	0.000336704	-0.00133984	-1.49462	1.76772	-1.90484	1.96092	0.867989	8.00829	95.1041	1.258e-07	2.77729e-05	AI934407	dehydrogenase E1 and transketolase domain containing 1	DHTKD1	55526	0.00241363
227146_at	0.0061074	-0.000668919	-0.00114496	-0.00227335	0.00341625	-0.000382508	4.58706e-05	0.00335573	0.000476333	-0.00132868	0.00257928	-0.995023	0.513323	-1.16332	1.15029	0.832607	8.61662	69.365	5.1522e-07	6.19034e-05	AW873348	quiescin Q6 sulfhydryl oxidase 2	QSOX2	169714	0.00114496
227174_at	0.00220468	-0.00947132	-0.00223328	0.00271306	0.00194697	-0.000406944	-0.000620519	0.00158044	-0.000220012	0.000890361	-0.000200553	-1.63437	2.78521	0.0229866	4.14228	-2.07088	5.92081	153.912	1.43546e-08	1.0394e-05	Z98443	WD repeat domain 72	WDR72	256764	0.00223328
227179_at	0.000505652	0.00806432	0.00634245	-0.00605891	-0.00255447	0.000325437	0.000391645	0.00196761	0.0026469	-0.00013447	0.0014413	-0.201749	-0.32503	-0.010379	-1.63158	1.40473	6.91041	54.7633	1.46732e-06	0.000103282	AK002152	staufen, RNA binding protein, homolog 2 (Drosophila)	STAU2	27067	-0.00634245
227236_at	0.00120839	-0.00923405	-0.00541497	-0.000164061	-0.00150767	0.00117571	-0.00284455	-0.00171252	-0.00121677	-2.84288e-05	-1.49876e-05	-0.251148	2.55369	-0.487084	1.80133	-1.47624	5.38742	64.6852	7.02624e-07	7.22644e-05	AI743596	tetraspanin 2	TSPAN2	10100	0.00541497
227274_at	0.00514075	0.00180207	0.00436713	-0.00665173	-0.00176347	0.00142785	-0.00172702	0.00311172	-0.000566308	0.00075486	0.00347119	-0.895187	0.92202	-0.566119	-0.0861508	1.02269	9.25108	50.7958	2.04296e-06	0.000119712	AI709389	synaptojanin 2 binding protein	SYNJ2BP	55333	-0.00436713
227431_at	0.00608103	-0.00186268	-0.00104124	-0.00294008	0.00214064	0.000449987	0.0013506	0.00205191	-0.00116874	-0.000379966	-0.000547415	-1.2473	1.03549	-1.25805	1.36072	0.833698	7.09085	55.0024	1.4394e-06	0.000102374	BF435958	---	---		0.00104124
227453_at	0.000641671	-0.00898464	-0.00528658	0.00444951	0.00226009	0.000555575	0.00134099	0.00185922	-0.000263735	-0.000648408	0.000877711	-0.149458	0.640772	-0.015864	1.49063	-1.04731	6.04161	52.5931	1.75332e-06	0.000111079	R60139	unc-13 homolog A (C. elegans)	UNC13A	23025	0.00528658
227494_at	0.000840991	-0.00896103	-0.00614032	0.00293903	0.00158947	-6.20984e-05	-0.000725097	0.00200259	0.000208434	0.000325565	-0.00104759	-0.0994354	0.892876	-0.216414	1.44495	-1.01722	7.64866	52.6992	1.73783e-06	0.000111079	N30069	hypothetical protein LOC253842	LOC253842	253842	0.00614032
227498_at	-0.000412702	0.0066774	0.0095037	-0.00257223	0.000593367	-0.00212989	0.00404328	0.00281844	-0.000214677	0.00105918	-3.68222e-06	-0.650435	-1.71884	1.20074	-2.01119	1.76368	5.82362	57.4327	1.18939e-06	9.31943e-05	AI480314	SRY (sex determining region Y)-box 6	SOX6	55553	-0.0095037
227499_at	0.00509584	-0.00575137	-0.00221316	-0.000619068	0.00236818	0.00119155	-0.000295917	0.00248593	-0.00076372	0.00367703	-0.000492406	-1.113	1.38639	-0.901321	1.81007	0.0450416	6.22701	66.2845	6.30453e-07	6.80453e-05	AA001400	frizzled homolog 3 (Drosophila)	FZD3	7976	0.00221316
227600_at	0.00558496	-0.000150073	0.00348185	-0.00557496	0.000246412	0.0028951	-0.00254482	0.00200848	-0.00107367	-0.000774887	1.67969e-05	-1.48905	1.59865	-0.953793	0.416311	1.31448	6.32381	73.4743	3.98794e-07	5.58321e-05	AW272333	---	---		-0.00348185
227690_at	0.00281692	-0.00884652	-0.00382172	0.000750155	0.00012786	0.000905427	-0.002214	0.00209692	0.00012219	0.000841045	6.00699e-05	-1.28933	3.51304	-0.89368	3.46614	-1.59666	5.12552	223.748	2.62657e-09	4.71442e-06	BE502537	gamma-aminobutyric acid (GABA) A receptor, beta 3	GABRB3	2562	0.00382172
227748_at	0.0057953	-3.38047e-05	0.000844043	-0.00575677	0.000201878	0.00198609	-0.00373124	0.000685935	0.000344539	0.000447404	-0.000334404	-1.17527	1.55957	-1.34649	0.572174	1.17162	7.27992	80.7668	2.61462e-07	4.47624e-05	AI971694	RNA binding motif protein, X-linked-like 1	RBMXL1	494115	-0.000844043
227759_at	0.00208476	-0.00839914	-0.00579899	0.00244294	0.0017771	0.00153053	-0.000556812	0.00353744	0.00302215	0.00202472	0.000659362	-0.480909	1.69586	-0.689907	2.56127	-1.33196	6.76003	53.1139	1.67891e-06	0.000109598	W92036	proprotein convertase subtilisin/kexin type 9	PCSK9	255738	0.00579899
227760_at	0.00261723	-0.00921798	-0.00324313	-4.55725e-05	-0.000883845	0.00131563	-0.00128712	0.000511039	-0.000961908	-0.000725675	0.000200369	-1.34982	3.967	-0.63034	3.18921	-1.67843	6.21898	219.66	2.85644e-09	4.87496e-06	AL522781	insulin-like growth factor binding protein-like 1	IGFBPL1	347252	0.00324313
227769_at	0.00201064	-0.00927718	-0.00374064	0.00202246	0.0027802	-0.000331102	0.00055097	0.00174945	-0.00166951	0.00026496	-6.90321e-05	-1.20862	2.4472	-0.333583	3.95833	-2.02361	5.89026	79.0666	2.87524e-07	4.73539e-05	AI703476	G protein-coupled receptor 27	GPR27	2850	0.00374064
227830_at	0.0020787	-0.00931387	-0.00404048	-0.00111476	-0.00129652	0.00125835	-0.00137977	0.0014945	-0.00163535	-0.000733806	-0.000657181	-1.00307	4.0895	-0.686544	2.83676	-1.79358	6.36519	120.844	4.28279e-08	1.73487e-05	AI478781	gamma-aminobutyric acid (GABA) A receptor, beta 3	GABRB3	2562	0.00404048
227846_at	-0.00301238	-0.00496271	-0.00675595	-0.00283594	-0.00699946	0.0055877	-0.00255085	-0.000632321	0.000318363	0.00128214	0.000743142	1.06032	2.33744	-0.203524	-0.251215	-1.53631	7.56434	58.2549	1.11701e-06	8.94789e-05	AA526584	G protein-coupled receptor 176	GPR176	11245	0.00675595
227862_at	-0.00185768	-0.00874482	-0.00475877	0.0037047	-0.001327	0.00210084	-0.000665761	-0.00338368	-0.00232043	-0.00248957	0.0010898	0.378956	1.36554	0.481159	1.25305	-1.99028	7.64173	49.3203	2.32524e-06	0.000127342	AA037766	TMF1-regulated nuclear protein 1	TRNP1	388610	0.00475877
227920_at	0.00540898	-0.0050225	-0.000856079	-0.00363057	-0.000687622	0.000138716	-0.0011233	0.000102101	-0.000185122	-0.000122949	0.000342525	-1.27946	2.04624	-0.981426	1.3886	0.325932	6.99943	53.1817	1.66951e-06	0.000109399	AV700885	BEN domain containing 3	BEND3	57673	0.000856079
227928_at	0.00609098	-0.000699049	0.00074407	-0.00276126	0.00308336	0.000461247	-0.00306486	0.00050859	-0.00237704	0.000861707	-0.00070705	-1.76809	1.20572	-1.69817	1.54337	1.46939	5.80908	58.4758	1.09848e-06	8.9302e-05	AI224977	chromosome 12 open reading frame 48	C12orf48	55010	-0.00074407
227984_at	-0.00452682	-0.00398853	0.00418526	0.00702604	0.0014599	-0.00269121	0.00369007	-0.000103331	-0.000382856	-0.000652759	-0.00120298	0.191102	-1.07446	1.98131	0.0177856	-1.16568	5.13337	71.5571	4.48623e-07	5.76028e-05	BE464483	lipase maturation factor 1	LMF1	64788	-0.00418526
227997_at	0.00129629	-0.00974499	-0.000633363	0.00447521	0.00067026	0.00153604	0.00244236	0.000500546	-0.00079607	0.000521667	0.000910368	-1.30774	1.96887	0.953782	2.97426	-1.96725	8.4603	119.221	4.55195e-08	1.77203e-05	AW007080	interleukin 17 receptor D	IL17RD	54756	0.000633363
227998_at	-0.00559047	-0.000641411	-0.00585646	0.00201705	-0.00114455	0.0021681	-0.000170522	-0.00202411	-0.000462953	-0.00250369	-0.000256956	1.83235	-0.397154	0.415282	-0.632295	-1.55529	9.4426	59.7484	9.98735e-07	8.5262e-05	AA045184	S100 calcium binding protein A16	S100A16	140576	0.00585646
228005_at	0.00594841	0.000315226	0.00221359	0.000545579	0.00417381	-0.00175207	0.00127348	0.00443578	-0.00209318	0.00153799	-0.00121933	-1.41454	-0.206792	-0.791563	1.27156	1.16348	7.3034	71.7289	4.43857e-07	5.76028e-05	BE677308	zinc finger, X-linked, duplicated B	ZXDB	158586	-0.00221359
228017_s_at	-0.00265155	-0.00752203	0.00539851	0.00544871	-0.000160411	-1.96111e-05	0.00380114	7.11e-07	0.000671309	0.00243902	0.000548185	-0.596835	0.252368	2.64962	0.591491	-1.64803	6.19817	93.4492	1.36106e-07	2.90358e-05	BF593263	Na+/K+ transporting ATPase interacting 4	NKAIN4	128414	-0.00539851
228029_at	0.00382568	-0.00763295	0.00389655	-0.00129342	-0.00209991	0.00101523	-9.06777e-05	0.00169006	-0.00291724	-0.00098514	-0.000834228	-1.81246	2.48717	0.336106	1.3584	-0.146266	8.22995	87.3774	1.83912e-07	3.54912e-05	AW513477	zinc finger protein 721	ZNF721	170960	-0.00389655
228038_at	0.00537802	-0.00524312	-9.67825e-05	-0.00168687	0.0019529	0.00158396	0.000200298	0.00322881	-0.000974084	-0.000179523	-0.000149841	-3.39814	3.77653	-1.86066	3.99344	0.717442	7.79467	210.344	3.47863e-09	5.557e-06	AI669815	SRY (sex determining region Y)-box 2	SOX2	6657	9.67825e-05
228097_at	0.00290464	-0.00740591	-0.00541453	0.0047	0.00314288	-0.00155467	0.00064398	0.00135481	-0.000872112	0.00230312	0.000756069	-0.425692	0.444802	-0.457386	1.88169	-0.672112	4.46379	61.3923	8.857e-07	8.03699e-05	AW292746	myosin regulatory light chain interacting protein	MYLIP	29116	0.00541453
228145_s_at	0.00462524	-0.00646912	-0.00380644	0.000156123	0.00247945	0.000755787	1.25333e-05	0.000199635	-0.000927296	0.000982658	-0.0015198	-1.41412	2.07202	-1.44592	3.04938	-0.345528	8.20888	96.7008	1.16744e-07	2.71195e-05	AI950078	zinc finger protein 398	ZNF398	57541	0.00380644
228157_at	0.00524874	-0.0039671	0.00403396	-0.00345641	-0.00321607	0.000905018	-0.00102369	0.00230746	-0.000435759	-0.000631047	0.000640325	-1.6973	2.14542	-0.330181	0.802475	0.667295	7.61846	52.7526	1.73011e-06	0.000111079	AI125646	zinc finger protein 207	ZNF207	7756	-0.00403396
228167_at	0.00309662	0.00795975	0.00428939	-0.0042317	0.000452653	-9.01355e-05	0.00112226	0.00265198	-0.00191477	0.00240353	-0.000969227	-0.706394	-0.87877	-0.847675	-1.09746	2.29607	4.4437	58.0967	1.13051e-06	8.94789e-05	AW574798	kelch-like 6 (Drosophila)	KLHL6	89857	-0.00428939
228191_at	0.00566076	-0.00451876	-0.000462188	-0.00206409	0.00048342	0.00240998	-0.000502659	-0.000701889	-0.00108613	0.000578003	0.00139393	-1.81776	2.39129	-1.30134	2.02305	0.539522	8.98649	53.6696	1.60371e-06	0.000106655	AA206016	feline leukemia virus subgroup C cellular receptor 1	FLVCR1	28982	0.000462188
228202_at	-0.00360322	-0.00289006	0.00947755	0.00434284	-0.00117878	-0.00132162	0.00302464	-0.000191925	0.000144046	-0.00126284	0.000190377	-0.646529	-0.932433	4.16719	-1.11519	-1.07732	4.30727	116.862	4.98112e-08	1.84097e-05	AI969945	Phospholamban	PLN	5350	-0.00947755
228271_at	0.000597769	-0.00926552	-0.0058006	-0.00101246	-0.00176086	0.00119658	-0.00252465	-0.000248917	0.000320704	-0.000713685	0.00123066	-0.0685528	1.96087	-0.327294	1.20507	-1.17025	7.02023	53.9267	1.5703e-06	0.000105745	AW001186	---	---		0.0058006
228273_at	0.00607736	-0.00180792	0.00130196	-0.00306849	0.00217956	0.00119977	-0.00117502	0.000720413	-0.000988355	0.000345035	0.00098517	-2.26175	1.87297	-1.64879	1.82874	1.51745	9.39177	123.609	3.86733e-08	1.65195e-05	BG165011	proline rich 11	PRR11	55771	-0.00130196
228341_at	0.00618445	-0.000437617	0.000177052	-0.000901026	0.00357054	0.000681648	-0.000540242	0.00323544	-0.00147368	-0.000420813	-0.000867631	-1.2745	0.44525	-1.18455	1.32974	1.02929	5.53832	77.5948	3.12678e-07	4.89291e-05	AI809108	nudix (nucleoside diphosphate linked moiety X)-type motif 16	NUDT16	131870	-0.000177052
228346_at	-0.00259563	-0.0084491	-0.00395091	0.000720619	-0.00382919	0.00391339	-0.00149612	-0.0022653	0.000147617	-0.000307958	-0.00125494	0.333262	1.43517	0.384284	0.392261	-1.32935	6.44233	56.2938	1.29935e-06	9.77691e-05	H47630	zinc finger protein 844	ZNF844	284391	0.00395091
228375_at	0.00481456	-0.00413175	-0.00271934	0.00385261	0.00581603	-0.002522	0.000430786	0.00504859	-0.00101349	-0.00200154	0.000456123	-1.05823	-0.103453	-0.880743	2.36841	0.100942	5.51881	64.6409	7.04765e-07	7.23484e-05	BE221674	immunoglobulin superfamily, member 11	IGSF11	152404	0.00271934
228378_at	0.00586064	0.00348386	-0.00184958	-0.000272772	0.00318768	-0.000408179	-0.000414688	0.000945172	0.000163099	-0.000370794	0.000933426	-0.894571	-0.441776	-1.86647	1.1065	1.54847	6.79924	52.2389	1.80624e-06	0.000112351	BF439204	chromosome 12 open reading frame 29	C12orf29	91298	0.00184958
228400_at	0.00377219	-0.00788905	-0.00357994	-0.000696602	0.00155144	-0.000135708	-0.00131811	0.0023751	-0.000808985	-0.00042278	-0.000558307	-1.06836	2.13596	-0.890192	2.34411	-0.612904	6.85961	83.0351	2.3102e-07	4.09633e-05	AW025141	shroom family member 3	SHROOM3	57619	0.00357994
228462_at	0.00260471	-0.00823879	-0.00559489	0.00241748	0.00105309	-0.00233492	-0.000698707	0.00211213	-8.98378e-05	6.51328e-05	0.000193408	-0.663066	1.63606	-0.798819	2.88418	-1.27253	5.46392	52.7078	1.7366e-06	0.000111079	AI928035	iroquois homeobox 2	IRX2	153572	0.00559489
228503_at	0.00610986	0.00143055	-0.000887102	-0.00164777	0.00360734	-0.000544091	-0.00241798	0.000383822	0.000232269	0.000625239	-0.00115099	-0.925328	0.195805	-1.39199	1.00226	1.11988	6.13944	59.6286	1.00765e-06	8.57173e-05	AW025023	ribosomal protein S6 kinase, 90kDa, polypeptide 6	RPS6KA6	27330	0.000887102
228559_at	0.00577266	-0.00372365	0.00180613	0.00110373	0.00280263	-0.000458597	0.00199167	0.00179467	-0.000951459	0.000379961	-0.000988307	-1.95383	0.779891	-0.617429	2.10058	0.705106	7.1779	105.176	8.0041e-08	2.1478e-05	BF111626	centromere protein N	CENPN	55839	-0.00180613
228590_at	0.00576319	-0.00337757	0.00266208	9.27605e-05	0.00226483	-0.00154562	0.00283296	0.00218454	5.42747e-05	0.000912349	0.000205635	-1.97433	0.77716	-0.488332	1.82145	0.826533	7.34385	80.2702	2.68765e-07	4.56033e-05	AA045257	Pentatricopeptide repeat domain 3	PTCD3	55037	-0.00266208
228600_x_at	0.00176684	0.00537396	0.00641827	-0.00868451	-0.00539869	0.00223895	-0.00157806	0.000356628	0.00268518	1.20165e-05	-1.01753e-06	-0.836508	1.54396	-0.304056	-2.4474	2.15616	5.8362	121.241	4.21991e-08	1.7328e-05	BE220330	chromosome 7 open reading frame 46	C7orf46	340277	-0.00641827
228623_at	-0.0014984	-0.00977342	-0.000641873	0.0028504	-0.00320059	0.00179423	0.000506323	-0.00171237	0.00198815	0.000460672	0.000841454	-0.235632	2.09773	1.27113	1.15303	-2.07972	6.25051	92.4358	1.42926e-07	2.98045e-05	AI224133	---	---		0.000641873
228708_at	-0.00488618	-0.000491251	-0.00801189	0.00148313	-0.00308669	0.000798937	5.85366e-05	-0.00289377	0.00104987	-0.00137492	-0.000234106	2.32409	-0.16367	-0.0660146	-0.586448	-1.83455	5.84054	68.316	5.51332e-07	6.4071e-05	BF438386	RAB27B, member RAS oncogene family	RAB27B	5874	0.00801189
228729_at	0.0057585	-0.00377545	0.00213826	-0.00192322	0.00174914	0.00153692	0.00170954	-0.000177462	-0.00159539	-0.000266287	0.00135908	-2.6461	2.15906	-0.98937	2.25047	1.08568	8.4148	55.8945	1.34081e-06	9.882e-05	N90191	cyclin B1	CCNB1	891	-0.00213826
228782_at	0.000525833	-0.00988973	-0.00316403	-0.00102045	-0.000973181	0.00336791	-0.00217211	0.00229337	-0.00121807	-0.000382474	-0.000453529	-0.460199	2.93866	0.0191248	1.61076	-1.60595	5.61769	56.1755	1.31146e-06	9.77691e-05	BG540454	secretoglobin, family 3A, member 2	SCGB3A2	117156	0.00316403
228802_at	0.00150079	-0.00972687	-0.00328862	0.00168367	-0.00102019	0.00172227	-0.00174109	0.0017595	0.000466719	0.000850114	0.00125874	-1.02983	3.76892	-0.0948243	3.24749	-2.32826	8.15226	257.845	1.37707e-09	4.63466e-06	BE348466	RNA binding protein with multiple splicing 2	RBPMS2	348093	0.00328862
228810_at	0.00592716	-0.00290358	-0.00168486	-0.00236512	0.00268602	0.0012552	-0.000215493	0.00113449	-0.000819731	0.00030079	-0.000288388	-1.48858	1.49566	-1.60162	1.91669	0.779981	6.063	96.1284	1.19896e-07	2.71697e-05	AW135279	cyclin Y-like 1	CCNYL1	151195	0.00168486
228894_at	0.00359957	-0.00809758	-0.00315171	0.00182846	0.0015434	-0.001617	-0.0009054	0.00234035	0.00113287	-0.000467868	0.000757347	-1.23176	1.82295	-0.677088	2.87489	-0.841092	7.30275	78.5326	2.96353e-07	4.78934e-05	AW237089	hypothetical protein LOC253842	LOC253842	253842	0.00315171
228915_at	-0.000149212	0.00555492	0.0110448	-0.000918635	-0.000214055	-0.000496503	0.00344077	0.0016939	0.00258561	-0.0014981	0.00047205	-1.23415	-1.89513	2.0491	-2.4422	2.12792	6.428	99.1025	1.04569e-07	2.52691e-05	AI650353	dachshund homolog 1 (Drosophila)	DACH1	1602	-0.0110448
228925_at	0.00591661	-0.00276275	0.000668588	-0.00354717	-0.000702714	0.00257614	-0.000845952	0.000711963	-0.00226503	3.9039e-05	3.10068e-06	-1.78469	2.30956	-1.3274	1.38358	0.977386	5.61986	65.6498	6.57961e-07	6.9823e-05	AW195586	ADAM metallopeptidase domain 1, pseudogene	ADAM1	8759	-0.000668588
228950_s_at	0.000713414	0.0101418	-0.00218935	-0.0011238	0.00262226	-0.00120109	0.000926127	0.00133452	0.00083817	-0.000194631	-0.000694739	1.01679	-3.22861	-1.88936	-1.36822	2.23114	7.56559	78.5291	2.96412e-07	4.78934e-05	AL534095	wntless homolog (Drosophila)	WLS	79971	0.00218935
228974_at	-0.000410549	-0.00935365	-0.00483435	0.00306181	-0.0030926	-0.000215426	-0.00121285	-0.000719557	-0.00209744	0.00162804	-0.00052427	0.0376915	2.57381	0.295799	2.22404	-2.57552	7.4267	53.5287	1.62237e-06	0.000107138	AI816281	---	---		0.00483435
228977_at	0.00570604	0.00293857	0.00110355	-0.000248399	0.00436542	-0.00386775	0.00268666	0.00072778	-0.000493437	0.000469333	0.000352759	-1.68714	-1.20112	-1.59325	1.46151	2.17535	6.93905	62.7234	8.05424e-07	7.68634e-05	AI669535	hypothetical protein LOC729680	LOC729680	729680	-0.00110355
228990_at	0.00608309	-0.000263898	-0.00248438	-0.0031488	0.00223214	-0.00150457	-0.000131588	0.00086678	0.000740548	-8.91118e-05	-0.000938769	-1.31923	0.954346	-2.12006	1.6764	1.29689	7.12654	62.774	8.02548e-07	7.68634e-05	AI339426	small nucleolar RNA host gene 12 (non-protein coding)	SNHG12	85028	0.00248438
229075_at	0.0060131	0.000452315	0.00132215	-0.00416792	-0.00014049	0.00247048	-0.00294463	0.000863841	-0.00076396	0.000160416	-0.000802561	-1.73817	1.83232	-1.7735	0.868605	1.73066	5.74511	67.6218	5.76932e-07	6.51099e-05	AI754871	spermatogenesis associated 5	SPATA5	166378	-0.00132215
229116_at	0.0058147	0.00076282	0.00248346	-0.00572386	0.000328183	0.000175792	-0.00124651	0.000176765	-6.53767e-05	-0.000402306	0.000371697	-1.78235	1.58029	-1.47181	0.585172	1.84668	5.83951	105.121	8.02285e-08	2.1478e-05	AI670947	connector enhancer of kinase suppressor of Ras 2	CNKSR2	22866	-0.00248346
229236_s_at	0.00414185	0.006648	0.00407819	-0.00303485	0.00337004	-0.00249309	-4.84917e-05	1.08013e-05	-0.000151015	-7.51308e-05	0.000976931	-0.987583	-1.13555	-0.975816	-0.331751	2.23781	7.56028	109.895	6.56995e-08	2.02965e-05	AI346445	sideroflexin 4	SFXN4	119559	-0.00407819
229294_at	0.00189881	-0.00868022	-0.0058602	0.00206348	0.00236915	0.000463244	0.000539249	0.00176136	-0.00118126	0.00104932	0.000152345	-0.467318	1.59885	-0.611924	2.62827	-1.40986	5.13053	76.9341	3.24836e-07	5.00478e-05	AL537395	junctophilin 3	JPH3	57338	0.0058602
229313_at	0.0055232	0.00270223	0.00332535	-0.00460317	0.00337485	-0.00100084	0.000734906	0.000300043	-0.000433327	0.00137108	-1.60971e-05	-2.1516	0.277461	-1.63794	0.638767	2.72523	6.96612	83.8941	2.2063e-07	3.96358e-05	AA843962	anoctamin 5	ANO5	203859	-0.00332535
229331_at	0.00406307	0.00619755	0.00393378	-0.00529131	0.00199868	-0.00190409	-0.000509656	0.00403358	0.000712498	-0.000231275	0.000111367	-1.16313	-0.51106	-1.22906	-0.612109	2.56093	5.14888	67.4264	5.84396e-07	6.55352e-05	AI559300	spermatogenesis associated 18 homolog (rat)	SPATA18	132671	-0.00393378
229417_at	0.00596087	0.00135713	0.00154346	-0.00132669	0.00426341	-0.00243232	0.00170241	0.00258619	-0.00164038	0.00106779	-5.81887e-05	-1.83021	-0.289339	-1.43929	1.51197	1.8782	6.2518	124.185	3.78697e-08	1.64141e-05	W46994	---	---		-0.00154346
229422_at	0.00570034	-0.0046756	0.000933681	-0.000789042	-9.91169e-05	0.000347922	0.000986236	0.00156041	-0.000411246	-0.000383505	0.00107321	-1.39627	1.34703	-0.58127	1.42041	0.387839	6.49329	52.8776	1.71219e-06	0.000110724	AA448346	nardilysin (N-arginine dibasic convertase)	NRD1	4898	-0.000933681
229433_at	0.00566696	0.00104735	-0.00399298	-0.00327349	0.00344658	-0.00123816	-0.00348421	0.00157701	-0.000561999	-0.000296367	-0.000228802	-0.561364	0.423489	-1.62852	0.975209	0.855743	6.27154	65.094	6.8326e-07	7.1076e-05	AU144571	RNA binding motif protein 26	RBM26	64062	0.00399298
229459_at	0.0022992	-0.00844524	-0.00446549	0.00497509	0.0015536	-0.000381926	0.000197673	0.00234034	0.000879794	0.000130505	6.9034e-05	-0.722221	1.17776	-0.32946	2.88737	-1.37564	4.64615	114.075	5.55345e-08	1.88379e-05	AV723914	family with sequence similarity 19 (chemokine (C-C motif)-like), member A5	FAM19A5	25817	0.00446549
229461_x_at	0.00387134	0.00709445	0.00478311	-0.00308749	0.00212278	-0.00015831	-0.000202131	0.000988086	-0.000693836	0.000260611	0.000576317	-1.52151	-1.46211	-1.35509	-1.01487	3.58885	5.11624	152.439	1.49935e-08	1.06343e-05	AI123532	neuronal growth regulator 1	NEGR1	257194	-0.00478311
229464_at	0.00577806	-0.00194588	0.00186131	-0.00175698	0.00545887	-7.11166e-05	0.00178654	0.00276594	-0.000787285	0.000165567	-0.000116826	-2.18171	0.65557	-1.12409	2.05371	1.34344	7.28149	58.4125	1.10375e-06	8.9302e-05	N50034	myelin expression factor 2	MYEF2	50804	-0.00186131
229483_at	0.00229482	-0.00873883	-0.00523156	0.00261792	0.000881508	-0.000813413	3.52924e-05	0.000498339	-0.000859947	-0.00110117	-0.000622649	-0.536675	1.46776	-0.474727	2.30685	-1.17399	5.7465	78.2478	3.01199e-07	4.80886e-05	AA760738	---	---		0.00523156
229485_x_at	0.00272201	-0.00672728	-0.00386787	0.00659827	0.00595854	-0.0021496	-0.000116282	0.00179337	-0.00382416	-0.000251698	0.000556567	-0.580767	-0.144672	-0.316994	2.30737	-0.697928	4.30211	57.7907	1.15719e-06	9.13262e-05	AI735586	shisa homolog 3 (Xenopus laevis)	SHISA3	152573	0.00386787
229500_at	0.00602876	0.000610615	0.00134121	-0.00478594	-0.000158505	-0.000501082	0.00103479	0.00179732	-7.53041e-05	-0.000881933	0.000694075	-1.65741	1.28634	-1.46828	0.831834	1.65293	6.38216	53.1331	1.67624e-06	0.000109598	AI609256	---	---		-0.00134121
229568_at	0.00566323	-0.00355625	0.000197766	0.00022091	0.00352992	-0.0031922	7.8801e-05	0.00435247	-0.00174476	-0.00101746	-7.30693e-05	-1.46299	0.572876	-0.817816	1.86373	0.574753	6.2304	51.3115	1.95425e-06	0.000117919	AI692878	MOB1, Mps One Binder kinase activator-like 2B (yeast)	MOBKL2B	79817	-0.000197766
229661_at	0.00144547	-0.00988573	-0.00292077	-0.00124401	-0.000563225	0.00233352	0.000335896	0.000820698	0.000218421	-0.00123023	7.57354e-05	-1.06529	4.06169	-0.0908849	2.65741	-1.99963	7.83015	62.388	8.24788e-07	7.79297e-05	NM_020436	sal-like 4 (Drosophila)	SALL4	57167	0.00292077
229724_at	0.00160438	-0.00965147	-0.00204236	-0.00186078	-0.00229417	0.00370866	-0.000994473	0.00155183	0.00140477	-0.000419298	-0.000201963	-1.12868	4.45728	-0.0666263	2.12958	-1.73238	5.46131	130.468	3.03067e-08	1.49485e-05	AI693153	gamma-aminobutyric acid (GABA) A receptor, beta 3	GABRB3	2562	0.00204236
229751_s_at	0.00602176	0.00135518	0.00209701	-0.00352203	0.000965865	-7.80471e-05	-0.00183492	0.00187525	-0.00346132	0.000908588	-0.0010332	-1.20654	0.675347	-1.07053	0.59352	1.29943	5.70538	55.4168	1.39254e-06	0.000100463	AW665832	pseudouridylate synthase 7 homolog (S. cerevisiae)-like	PUS7L	83448	-0.00209701
229778_at	0.0029574	-0.00550878	-0.00387658	0.00729965	0.00672012	-0.00398108	0.00164463	0.00180916	-0.00154763	0.000128015	0.000510426	-0.615141	-0.709674	-0.371907	2.47002	-0.547045	4.00952	99.7934	1.01356e-07	2.47114e-05	BE326710	chromosome 12 open reading frame 39	C12orf39	80763	0.00387658
229782_at	0.0012425	-0.0100186	-0.00207335	0.000834391	0.00139324	0.00286239	-0.00104713	0.00124334	-0.000912343	-0.000299053	0.00031268	-1.3992	4.14791	0.291063	3.62768	-2.59593	6.39031	58.1554	1.12548e-06	8.94789e-05	BE468066	rhabdomyosarcoma 2 associated transcript (non-protein coding)	RMST	196475	0.00207335
229797_at	0.00269334	-0.00891697	-0.00396664	0.00124957	0.00124692	0.000105985	0.00129492	0.00202063	0.000515277	0.000184692	0.000230616	-0.85755	1.82552	-0.422823	2.4032	-1.0712	4.74236	69.8295	5.00156e-07	6.05654e-05	AI636080	mucolipin 3	MCOLN3	55283	0.00396664
229800_at	0.0031056	-0.0085105	-0.00261711	-0.00143506	-0.000813637	0.00270909	-0.00287704	0.00399172	0.000591255	0.000329315	-0.000158692	-1.36942	3.85706	-0.837601	2.55392	-1.06048	5.63473	95.6745	1.2247e-07	2.74117e-05	AI129626	doublecortin-like kinase 1	DCLK1	9201	0.00261711
229803_s_at	0.00490899	0.0046425	0.00438521	-0.00445538	0.00256816	-0.00142743	-0.000809128	-0.000888707	-0.00124426	0.000210246	0.00134925	-0.9816	-0.133571	-0.772008	-0.0803153	1.59434	7.34416	49.8697	2.21491e-06	0.000123979	AI347000	---	---		-0.00438521
229830_at	0.000786086	-0.0101558	-0.00259505	0.00147225	0.000483182	-0.000558142	-0.00169483	0.00171591	-0.000298547	-0.000311676	-0.000295216	-0.934752	3.13202	0.375515	3.08626	-2.41711	6.21172	58.8402	1.06873e-06	8.81667e-05	AW205919	Platelet-derived growth factor alpha polypeptide	PDGFA	5154	0.00259505
229876_at	0.00581021	0.00114088	1.90826e-06	-0.00024156	0.00589126	-0.00313561	0.00176284	0.00269949	0.0016441	0.000121578	-0.000391675	-1.34171	-0.611365	-1.34049	1.57226	1.39098	6.82318	85.0391	2.0765e-07	3.81097e-05	BE503584	phosphorylase kinase, alpha 1 (muscle)	PHKA1	5255	-1.90826e-06
229899_s_at	0.00542495	-0.0035878	-0.00168551	-0.00494227	-0.00233854	0.00121182	-0.00316135	0.00208931	0.000519661	-8.63885e-05	-0.000925229	-1.21405	2.54493	-1.45136	1.17607	0.549275	6.67349	77.285	3.18307e-07	4.93856e-05	AI625235	non-protein coding RNA 275	NCRNA00275	441951	0.00168551
229908_s_at	0.00598421	-0.0016013	0.00233258	-0.00328363	-0.000121241	-0.000666507	-0.00103897	0.00396756	-0.000820948	-0.0010603	0.00130943	-1.33179	1.11782	-0.757168	0.84768	0.898845	7.93477	53.6131	1.61116e-06	0.000106655	BF338332	unkempt homolog (Drosophila)-like	UNKL	64718	-0.00233258
230003_at	0.00353485	0.00703025	0.0054731	-0.00427381	0.000952266	-0.00136416	-0.000335405	0.00116371	-0.000315591	-0.000228368	0.000596093	-0.958842	-0.696356	-0.699051	-0.90806	2.26237	6.51138	140.7	2.15463e-08	1.29597e-05	AW779917	---	---		-0.0054731
230195_at	0.00324133	-0.00799269	-0.00475725	0.00207582	0.00220483	0.000609278	-0.000815827	0.00219133	-0.000210247	-0.00073889	-0.000419041	-1.43221	2.82116	-1.41399	4.55381	-1.60139	5.53951	417.962	1.51878e-10	1.98931e-06	BF672169	hypothetical LOC100131138	LOC100131138	100131138	0.00475725
230201_at	0.00551131	-0.00461546	0.00257615	-0.00245735	-0.000754387	0.000267748	-0.000429864	0.00151346	-0.00101821	-0.00162332	0.000982687	-2.03431	2.23342	-0.606756	1.54159	0.666615	6.66802	94.8098	1.27562e-07	2.77729e-05	R43158	fragile X mental retardation, autosomal homolog 1	FXR1	8087	-0.00257615
230244_at	0.00368116	0.00718506	0.00470615	-0.00404508	0.00205673	-0.000634637	0.00012329	0.00048095	0.000703735	-0.000892292	-0.000778862	-0.82434	-0.773082	-0.786111	-0.700506	2.07311	5.12721	124.748	3.71052e-08	1.62114e-05	AI871385	chromosome 2 open reading frame 82	C2orf82	389084	-0.00470615
230256_at	0.00572023	-0.00198837	-0.00049798	0.00142735	0.00629741	-0.00101928	0.000124787	0.00275372	0.00214021	0.00259122	-0.000766715	-1.5692	-0.0405526	-1.25187	2.30796	0.878659	6.53656	71.095	4.61745e-07	5.77055e-05	AW009436	Chromosome 1 open reading frame 104	C1orf104	284618	0.00049798
230270_at	0.0042244	-0.0062216	0.00561416	-0.00121187	-0.00174923	0.00151293	0.00111052	0.00303086	-0.000257264	0.0017073	-0.000443157	-1.7827	1.89401	0.388226	1.02085	0.211973	6.88273	84.9768	2.08332e-07	3.81097e-05	N32872	PRP38 pre-mRNA processing factor 38 (yeast) domain containing B	PRPF38B	55119	-0.00561416
230300_at	0.00554279	0.00273545	0.00396417	-0.00453569	0.000839913	0.0017045	-0.00119491	0.000384535	-0.000120106	-0.000563514	-0.000602635	-1.19341	0.610679	-0.870564	0.123509	1.48788	5.35238	60.2985	9.59059e-07	8.40724e-05	N22849	---	---		-0.00396417
230356_at	0.00292869	-0.00781156	-0.00532898	0.0033	0.00305726	-0.000292483	-0.000203463	0.0022049	-0.000222957	0.000826074	-9.56814e-06	-1.15235	1.92379	-1.28929	4.62761	-1.71447	5.24738	360.481	2.98605e-10	2.07018e-06	AW014743	---	---		0.00532898
230497_at	0.0010564	-0.00949247	-0.00449461	0.000628807	-0.000139578	0.00325005	-0.00261897	0.000750306	-0.00178878	-0.00168887	-0.00058443	-0.386615	2.57181	-0.293089	1.97658	-1.59298	6.2167	76.9082	3.25325e-07	5.00478e-05	BE503640	CUGBP, Elav-like family member 5	CELF5	60680	0.00449461
230534_at	0.00447668	-0.00691841	-0.00313366	-0.000100725	0.0026228	-0.000769821	0.00110011	0.000386444	-0.000947045	0.00040153	0.000509384	-1.30139	1.67798	-0.990292	2.59294	-0.32637	5.87995	54.7613	1.46754e-06	0.000103282	AW025362	zinc finger protein 678	ZNF678	339500	0.00313366
230559_x_at	0.00570192	-0.00352851	-0.00112753	-0.00215663	0.00259803	-6.00086e-05	-0.000179776	0.00408651	-0.00488543	0.00133681	0.000860284	-1.79741	1.66861	-1.56295	2.2644	0.773578	4.89437	55.4406	1.3899e-06	0.000100406	AI277617	FYVE, RhoGEF and PH domain containing 4	FGD4	121512	0.00112753
230597_at	0.00287704	-0.00922194	-0.00115393	-0.00117273	0.00109722	0.00190742	0.00056254	0.00215194	-7.42085e-06	7.80711e-06	0.000702827	-2.1978	4.41709	-0.275929	3.60484	-1.49384	8.28262	68.8194	5.33631e-07	6.29287e-05	AI963203	solute carrier family 7 (cationic amino acid transporter, y+ system), member 3	SLC7A3	84889	0.00115393
230660_at	0.000153504	-0.00593251	-0.00820821	0.00761582	0.00343126	-0.00298107	0.000377042	0.000427887	-0.00111881	-0.00210165	0.000876782	0.376138	-0.456022	-0.419088	2.15999	-1.38473	5.78507	72.3048	4.28336e-07	5.74039e-05	AU146709	SERTA domain containing 4	SERTAD4	56256	0.00820821
230763_at	0.00264926	-0.00537376	-0.00570368	0.00644783	0.00682695	-0.00231052	0.00233926	0.00403807	-0.00201345	-0.000211998	0.000785765	-0.491194	-0.692772	-0.737338	2.99292	-0.7816	4.84058	72.8531	4.14164e-07	5.62655e-05	AA905508	spermatogenesis associated 17	SPATA17	128153	0.00570368
230785_at	0.00271137	-0.00852434	-0.00486906	0.00165579	0.00164063	-0.000681224	-0.00199914	0.00160753	0.001642	-0.000291281	-0.00023169	-0.695581	1.7752	-0.707904	2.50261	-1.09262	5.36965	77.5439	3.13593e-07	4.89321e-05	AI634411	---	---		0.00486906
230788_at	0.00190984	-0.00969831	-0.00213382	-0.00137875	-0.00108405	0.00171353	-0.00147089	0.00296075	-0.00062917	-0.00170356	-0.000554642	-1.45024	4.6527	-0.180517	2.88635	-1.90454	6.92845	91.6841	1.48255e-07	3.05533e-05	BF059748	glucosaminyl (N-acetyl) transferase 2, I-branching enzyme (I blood group)	GCNT2	2651	0.00213382
230896_at	0.00261961	-0.00903526	-0.00342851	0.000182907	-0.000213383	0.00336231	-0.000319331	-0.000507799	-0.000880217	0.00189941	-0.000220842	-1.192	3.57105	-0.624304	2.93825	-1.54098	5.59441	74.3849	3.77497e-07	5.4685e-05	AA833830	BEN domain containing 4	BEND4	389206	0.00342851
230960_at	0.00237999	-0.00880943	-0.00410847	0.00349641	0.00213636	0.000703133	0.000742124	0.0012294	-0.00105691	0.000505428	0.000599359	-0.905069	1.66847	-0.371678	3.10717	-1.47475	5.75232	182.969	6.5537e-09	7.4566e-06	AI740721	immunoglobulin superfamily, DCC subclass, member 3	IGDCC3	9543	0.00410847
231037_at	0.00194887	-0.00659173	-0.00457877	0.00776803	0.00521095	-0.00286182	0.000958382	0.00418703	-0.0019685	0.0015893	-0.00110862	-0.362443	-0.358176	-0.177594	2.10033	-0.799985	5.08833	50.3169	2.12976e-06	0.000122039	AA004300	---	---		0.00457877
231079_at	0.000599786	-0.0100697	-0.00371354	0.000395062	0.000506295	0.000320239	-0.000292366	0.00115563	0.000432885	0.000800954	0.000276918	-0.558607	2.70711	0.100289	2.41196	-2.0186	7.05386	50.5821	2.08115e-06	0.000120651	AW137517	---	---		0.00371354
231269_at	0.00546274	-0.00103901	-0.00037163	-0.00755659	0.000714057	0.00262202	-0.00149065	0.00141152	-7.30634e-05	0.000511278	-0.000235263	-1.65292	2.79376	-2.11229	0.942221	1.50172	6.54632	67.8349	5.68921e-07	6.4935e-05	AU153330	activating signal cointegrator 1 complex subunit 3	ASCC3	10973	0.00037163
231310_at	0.00121709	-0.0102188	-0.00111221	0.000683095	0.00119435	0.00160944	0.000661999	0.00168695	-0.000632703	-0.000567407	-0.000218586	-2.1554	5.11101	0.954382	4.60485	-3.25443	8.14688	67.8712	5.67573e-07	6.4935e-05	BF057073	---	---		0.00111221
231311_at	0.00577127	0.00138931	0.00237124	-0.000611077	0.00482051	-0.00140056	0.00169174	0.00523946	-6.32816e-05	-0.00158137	-0.000947821	-1.6314	-0.386632	-1.03188	1.27359	1.59913	5.5718	71.9781	4.37059e-07	5.76028e-05	AA725246	---	---		-0.00237124
231325_at	0.00187141	-0.00976896	0.000683762	-0.00142819	-0.00324925	0.00157646	-0.000160873	-0.00109123	-0.00157922	-0.00107951	-0.000516996	-1.53536	4.01872	0.572146	1.8308	-1.40618	6.18957	76.0294	3.42434e-07	5.12366e-05	AI802048	unc-5 homolog D (C. elegans)	UNC5D	137970	-0.000683762
231381_at	0.000789904	-0.0102513	-0.00084939	0.0011833	0.00102995	0.00281054	0.000731329	0.00176969	-0.000412008	0.00021971	0.000346201	-2.19643	5.62383	1.46634	4.82711	-3.87381	7.90733	61.0305	9.09185e-07	8.14371e-05	BF223023	hypothetical LOC790952	ESRG	790952	0.00084939
231407_s_at	0.00246206	-0.00886307	-0.00390662	-0.000481751	-0.00144174	0.0042823	-0.000752661	0.000927222	0.000982461	-0.000713658	0.000863635	-0.77507	2.9662	-0.566795	1.99798	-1.16779	7.0957	74.2776	3.79933e-07	5.47474e-05	AI636647	forkhead box H1	FOXH1	8928	0.00390662
231470_at	0.00314937	-0.00811402	-0.00449983	0.00268515	0.00173491	0.000955997	-0.00172444	0.00177987	-0.000164521	-0.00115875	3.06745e-05	-1.03859	2.1268	-0.940178	3.30814	-1.24898	4.86708	189.721	5.55957e-09	6.90056e-06	BE138486	---	---		0.00449983
231502_at	0.00381474	-0.00765033	-0.0042376	-0.00024776	0.000683789	0.00188699	-0.00174773	-0.000665311	0.00102283	-0.00128568	0.00114037	-0.818026	2.02609	-0.900848	1.99043	-0.583724	4.33926	67.9531	5.64539e-07	6.48001e-05	BF591615	---	---		0.0042376
231628_s_at	-0.00242832	0.00683618	0.00681509	-0.00517499	-0.00341388	-0.00018674	0.00338124	0.000499195	0.00163741	0.000478633	-0.00110607	0.438944	-1.30602	1.78273	-4.86519	2.05136	8.50633	58.151	1.12585e-06	8.94789e-05	AW262311	---	---		-0.00681509
231644_at	0.00267361	-0.00905999	-0.00338515	0.000488483	0.000506118	0.000344486	-0.00251215	0.00235837	-1.07671e-05	-0.000411999	-0.000428024	-1.4415	3.75791	-0.795844	3.68202	-1.73526	5.36526	123.577	3.87178e-08	1.65195e-05	AW016812	---	---		0.00338515
231690_at	0.00305144	-0.0081714	-0.0046204	0.00244038	0.00227153	0.000722469	-0.000622057	0.00206789	-0.0018488	0.00138723	-0.000302347	-0.839338	1.62983	-0.739261	2.73209	-1.03249	4.78459	147.464	1.74233e-08	1.18943e-05	AI962352	---	---		0.0046204
231725_at	0.00157226	-0.00927111	-0.00497909	0.000860644	0.000145705	0.00249423	-0.00126105	0.00162129	-0.00155195	-0.000645265	0.000889758	-0.465209	2.34407	-0.439843	2.1492	-1.45572	5.23899	114.281	5.50854e-08	1.88024e-05	NM_018936	protocadherin beta 2	PCDHB2	56133	0.00497909
231731_at	0.003437	-0.00556798	-0.00575753	0.00568621	0.00531208	-0.00128516	-0.000650061	0.00174384	-0.00349101	-0.000466913	0.000837925	-0.464732	-0.0148922	-0.808881	2.28798	-0.516374	4.40694	69.3494	5.15739e-07	6.19034e-05	NM_021728	orthodenticle homeobox 2	OTX2	5015	0.00575753
231736_x_at	0.00593084	0.000926839	-0.00282772	-0.0005425	0.00295426	-0.00079916	-0.00215789	0.00536166	-0.000134496	5.67378e-05	0.00166352	-1.30886	0.292268	-2.4971	2.02543	1.52589	10.9916	52.9185	1.70638e-06	0.000110724	NM_020300	microsomal glutathione S-transferase 1	MGST1	4257	0.00282772
231769_at	0.00368303	0.00785774	0.00234133	-0.00309214	0.00194097	-0.00338256	0.000662129	0.000581134	-0.000601235	-0.000315924	0.000966119	-0.590663	-1.30274	-1.16486	-0.518986	2.14748	5.48688	70.9096	4.67141e-07	5.819e-05	AF129536	F-box protein 6	FBXO6	26270	-0.00234133
231775_at	0.00568122	0.00169338	0.00181172	-0.00317482	0.00578631	-0.00168422	0.00089199	0.00183042	-0.000505452	0.000437593	-0.000957647	-1.53434	-0.146995	-1.33263	1.09126	1.74426	7.08968	55.5036	1.38296e-06	0.000100167	W65310	tumor necrosis factor receptor superfamily, member 10a	TNFRSF10A	8797	-0.00181172
231839_at	0.0061957	0.000199463	0.00235148	-0.00238842	0.00131525	-1.17997e-05	-0.000172847	0.0018292	-0.000846762	-0.000741835	0.00292284	-1.2962	0.626164	-0.874087	0.810642	1.12977	8.29595	71.3481	4.545e-07	5.76028e-05	BF675750	phosphodiesterase 12	PDE12	201626	-0.00235148
231875_at	0.00570554	0.0028874	0.00151187	0.00068062	0.00523551	-0.0013331	0.000913631	0.00292511	0.000991429	0.00229016	-0.000579441	-2.09585	-1.40841	-1.90632	1.85156	2.60183	5.76254	120.044	4.41304e-08	1.75919e-05	AF155117	kinesin family member 21A	KIF21A	55605	-0.00151187
231898_x_at	0.00444277	0.00613609	0.00359733	-0.00424191	0.00241199	-0.00102369	0.00016775	0.00280378	-0.000263474	-0.000180369	-0.000349675	-2.36629	-1.28375	-2.53625	-0.711664	4.95949	5.59419	351.402	3.355e-10	2.07018e-06	AW026426	SOX2 overlapping transcript (non-protein coding)	SOX2OT	347689	-0.00359733
231913_s_at	0.00486036	0.0064186	0.00210208	-0.00195547	0.00187338	-0.000260308	-0.00108729	0.000194852	0.00103914	0.00073934	-0.000204483	-0.968092	-0.807527	-1.51462	-0.0528989	2.28228	5.57455	51.9428	1.85196e-06	0.000114284	X64643	BRCA1/BRCA2-containing complex, subunit 3	BRCC3	79184	-0.00210208
231945_at	0.00240305	-0.00858026	-0.00396437	0.00447766	0.00214976	0.000900137	-0.000486065	0.00247733	-9.06735e-05	-0.000228773	-0.000589273	-0.789394	1.32487	-0.321565	2.76887	-1.28377	5.40405	125.837	3.56776e-08	1.58916e-05	AK001570	filamin A interacting protein 1	FILIP1	27145	0.00396437
231968_at	0.00586624	-0.00146885	0.00278	-0.00366447	0.00104059	0.00235658	-0.000275061	0.00387322	-0.000693751	0.000895157	-0.00132007	-1.32749	1.14576	-0.71215	0.764082	0.910945	8.80495	59.3098	1.03182e-06	8.63864e-05	AK025416	UDP-glucose glycoprotein glucosyltransferase 1	UGGT1	56886	-0.00278
231991_at	0.000777444	-0.00850954	-0.00686185	0.00274858	-0.000511561	0.00269413	-0.00209647	0.0003071	-0.00159791	0.00368269	0.000709507	0.0257265	1.45604	-0.422709	1.57749	-1.28093	6.1196	56.1508	1.31402e-06	9.77691e-05	BF970287	chromosome 20 open reading frame 160	C20orf160	140706	0.00686185
232001_at	0.00537236	-0.00427028	0.000275249	-0.00463053	-0.00284788	0.00139061	-0.00223975	0.000984773	-0.000233534	0.000729889	-0.000915282	-1.30704	2.37894	-0.9357	0.992449	0.476228	6.58019	62.0736	8.43454e-07	7.81055e-05	AW193600	hypothetical LOC439949	LOC439949	439949	-0.000275249
232060_at	0.00228246	-0.00902816	-0.00261202	0.00464965	-0.000859147	0.00119086	0.000556483	0.00203366	-0.00112884	-2.12916e-05	0.000345343	-1.15914	2.1366	0.0795199	3.08883	-1.66529	5.48549	59.9671	9.82727e-07	8.47896e-05	AK000776	receptor tyrosine kinase-like orphan receptor 1	ROR1	4919	0.00261202
232105_at	0.00153597	-0.00721216	-0.00602976	0.00673922	0.00419608	-0.00181945	0.00111045	0.00267573	-0.000637011	-0.00159021	2.951e-05	-0.341	-0.0290175	-0.491502	3.63721	-1.74647	5.96158	159.353	1.22646e-08	9.30287e-06	AU148391	hypothetical LOC100506918	LOC100506918	100506918	0.00602976
232111_at	0.00264609	-0.00917095	-0.00298633	0.00116237	-5.21581e-06	0.00025148	-0.00156135	0.0026597	-0.000644542	0.00171044	-0.000339795	-1.33609	3.15111	-0.473214	3.23163	-1.55322	6.452	132.985	2.78011e-08	1.40583e-05	AU151635	---	---		0.00298633
232113_at	-0.0057106	0.00327751	0.00230632	0.00148736	-0.00417258	-0.000744084	0.0018525	-0.00123184	0.00114341	0.00034202	0.000187938	2.40937	-2.2137	2.8862	-3.75536	-1.09203	7.7366	125.749	3.57912e-08	1.58916e-05	N90870	---	---		-0.00230632
232180_at	0.00110844	-0.00969224	-0.00152321	-0.0029488	-0.00303412	0.00371065	-0.00146373	0.000813145	-0.000228524	-0.00209562	-0.000548788	-0.980023	4.55037	0.119065	1.62774	-1.70131	6.40437	109.865	6.57807e-08	2.02965e-05	U00954	UDP-glucose pyrophosphorylase 2	UGP2	7360	0.00152321
232191_at	-7.71173e-05	-0.00672632	0.00062889	-0.00774068	-0.00705104	0.00664555	-0.00444093	-1.962e-05	-0.00148628	0.00295027	-0.000992275	-0.38612	4.05705	0.11329	-0.391413	-0.780814	5.58915	62.6807	8.07859e-07	7.68634e-05	BC005107	chromosome 21 open reading frame 105	C21orf105	90625	-0.00062889
232254_at	0.00535362	0.00324193	0.00362177	-0.0053226	-0.000257659	0.00169195	-0.00171992	0.00157106	-0.000797008	0.000203721	0.000451328	-1.33191	0.889971	-1.15051	-0.0568999	1.84019	6.03066	94.8522	1.27306e-07	2.77729e-05	AI953354	---	---		-0.00362177
232263_at	0.00610689	-0.000448152	0.000952647	-0.00396653	0.00186841	-0.00119829	-0.00156258	-0.000212068	-0.000953163	0.000245004	-0.000535185	-1.64681	1.20404	-1.5198	1.21627	1.44782	6.24458	61.3889	8.85919e-07	8.03699e-05	AK022853	solute carrier family 6 (neutral amino acid transporter), member 15	SLC6A15	55117	-0.000952647
232278_s_at	0.00597216	-5.30385e-05	-0.00111956	-0.000186526	0.00588655	-0.00148203	-0.000155189	0.000575056	-0.000300448	0.0012055	0.000460775	-1.86346	-0.190829	-2.23358	2.60161	1.68172	6.20178	118.443	4.68833e-08	1.79052e-05	AJ278112	DEP domain containing 1	DEPDC1	55635	0.00111956
232282_at	0.00390156	-0.00640761	-0.00482177	0.00366181	0.00452085	0.000112603	0.000844322	0.00148658	-0.00123271	0.000931423	0.000798898	-0.965283	0.730246	-1.06883	3.09794	-0.630875	5.72992	124.77	3.7076e-08	1.62114e-05	H06509	WNK lysine deficient protein kinase 3	WNK3	65267	0.00482177
232304_at	0.00362161	-0.00744549	-0.00521942	0.00151382	-5.24298e-05	0.000875652	-0.00238023	0.00204993	7.05486e-05	-0.000953349	0.000281096	-0.699776	1.82124	-0.972727	2.19403	-0.721508	5.07131	83.9964	2.19431e-07	3.95505e-05	AK026714	Pellino homolog 1 (Drosophila)	PELI1	57162	0.00521942
232347_x_at	0.0027615	-0.00866803	0.00376825	-0.00206985	-0.00245575	0.00276256	0.000149508	0.000220034	-0.00132242	-0.00094671	0.000383724	-0.987785	1.76205	0.357448	0.69986	-0.304435	7.08865	52.615	1.75011e-06	0.000111079	AK021441	---	---		-0.00376825
232388_at	-0.0053147	0.00116909	0.00617152	0.00154186	-0.00348544	0.00144892	0.00362617	-0.000251727	0.00160429	-0.000469339	-0.000428203	0.515793	-0.64841	1.96145	-1.63703	-0.515939	6.95583	63.897	7.41888e-07	7.36668e-05	AB051550	contactin associated protein-like 4	CNTNAP4	85445	-0.00617152
232531_at	-0.00499615	-0.00147643	0.00624889	0.00482295	-0.00148183	0.00179649	0.00411305	-0.0015072	0.00122951	-0.00106874	0.00061122	0.464352	-1.27782	3.59385	-1.49473	-1.43783	6.03036	61.1183	9.03417e-07	8.13259e-05	AL137578	EMX2 opposite strand (non-protein coding)	EMX2OS	196047	-0.00624889
232541_at	-0.00353857	-0.00674987	-0.000672626	0.00766455	-0.000438054	-0.00215145	0.00356051	0.000242794	-0.00022132	-0.000868197	0.000522713	0.372115	-0.434803	1.75881	0.931783	-2.02091	5.59966	96.1857	1.19577e-07	2.71697e-05	AK000106	---	---		0.000672626
232629_at	0.00333768	-0.00738576	-0.00431087	0.00344311	0.00454002	-0.000346531	-0.000703735	0.00275892	0.00076406	-0.00178604	-0.000762899	-0.723191	0.740874	-0.620252	2.31805	-0.655629	4.45007	73.2754	4.03638e-07	5.58321e-05	AF182069	prokineticin 2	PROK2	60675	0.00431087
232796_at	0.00460802	-0.00687708	-0.00240957	-0.00146251	0.000190009	0.00114814	-0.0023563	2.58755e-05	0.00154739	0.000839011	0.00141733	-0.930811	1.79516	-0.766901	1.5196	-0.169379	6.00668	59.2898	1.03336e-06	8.63864e-05	AK021556	---	---		0.00240957
232835_at	-0.000884672	-0.0101605	-0.00134697	0.00039219	-0.00199403	0.00229576	-0.00254621	0.000385186	-0.0010171	0.000559771	-0.000518317	-0.330159	2.77505	0.787198	1.2881	-1.97839	7.56459	69.1501	5.22378e-07	6.21426e-05	AA533080	---	---		0.00134697
232985_s_at	0.00231293	-0.00912637	-0.00388028	0.00184358	0.00070022	0.0028156	-0.000108684	0.000472437	-0.00101979	0.000162998	0.000114879	-1.58463	4.4229	-0.741356	4.84764	-2.62719	6.9521	140.447	2.17224e-08	1.29597e-05	AK022821	developmental pluripotency associated 4	DPPA4	55211	0.00388028
233064_at	0.00173413	-0.00945799	-0.0024441	0.00411518	0.00151115	0.000434326	0.000476655	0.0023956	-6.76157e-05	-0.00205131	-5.41153e-05	-0.903972	1.52361	0.211127	2.61409	-1.48738	6.09798	145.248	1.86586e-08	1.2131e-05	AL365406	zinc finger RNA binding protein 2	ZFR2	23217	0.0024441
233142_at	0.00259314	-0.00704493	-0.00400536	0.00642111	0.00567213	-0.00230489	-0.000453487	0.00181062	-0.00130127	-0.000351205	-0.00108873	-0.581021	-0.0445974	-0.317732	2.39902	-0.79164	5.30206	73.0918	4.08175e-07	5.60371e-05	AK022793	---	---		0.00400536
233251_at	0.00296108	-0.00840692	-0.00428505	0.00175948	0.00290411	0.000771928	-0.000559735	0.000638998	-1.10538e-05	-0.0030086	-0.000232376	-0.780821	1.53303	-0.607753	2.40762	-0.930099	4.56455	68.251	5.5367e-07	6.41987e-05	AK024960	Spermatid perinuclear RNA binding protein	STRBP	55342	0.00428505
233252_s_at	0.005444	-0.00515643	-0.00205671	1.14562e-06	0.00115706	-0.00112527	-0.0019879	0.000147024	-0.000556533	0.000896635	0.00206156	-1.27636	1.46365	-1.10686	2.03484	0.169829	8.15299	49.8359	2.22152e-06	0.000123979	AK024960	spermatid perinuclear RNA binding protein	STRBP	55342	0.00205671
233337_s_at	-0.00135397	-0.00706415	-0.00887215	0.00300555	-0.00121726	0.00274715	-0.00139675	0.000647537	0.00093605	0.00031782	-0.000367314	0.783519	1.29605	-0.436415	1.40334	-1.86015	7.00676	82.4524	2.3841e-07	4.20008e-05	AF131749	seizure related 6 homolog (mouse)-like 2	SEZ6L2	26470	0.00887215
233413_at	0.00143553	-0.00716127	-0.00140901	-0.00688542	-0.00636749	0.00538573	-0.00468431	0.00066268	0.004091	-0.000968532	-0.000150963	-0.776194	5.77947	-0.636646	0.393901	-0.988466	4.50478	96.7333	1.16568e-07	2.71195e-05	AU156421	---	---		0.00140901
233445_at	0.00282799	-0.00906454	-0.00318228	0.000218027	0.00106922	0.00114387	-2.80136e-05	-0.000900384	-2.07847e-05	0.00215198	0.00016835	-0.845738	1.98951	-0.383887	2.02095	-0.908807	6.45303	50.206	2.15051e-06	0.000122595	AK022040	---	---		0.00318228
233655_s_at	0.00621917	-0.00071685	-0.000817251	0.000321214	0.0037094	-0.000665951	-0.00116507	-0.00028759	-6.34171e-05	-0.000129452	0.000636183	-1.65726	0.387397	-1.78608	2.14923	1.28603	5.87425	61.1121	9.03823e-07	8.13259e-05	AK022964	HAUS augmin-like complex, subunit 6	HAUS6	54801	0.000817251
233675_s_at	0.00212173	-0.00528023	0.00129179	-0.00871202	-0.00775744	0.00465842	-0.00458897	-0.00162905	0.000654244	-0.00041361	-0.00149479	-0.592556	2.91071	-0.271208	-0.194103	-0.0674715	4.42305	54.367	1.51504e-06	0.000104603	AL122103	TPTE and PTEN homologous inositol lipid phosphatase pseudogene	LOC374491	374491	-0.00129179
233753_at	0.00372614	-0.00674387	-0.0049151	0.00318471	0.00435209	-0.0014059	0.000896755	0.000712809	-0.00217966	-0.00155581	-0.00069462	-0.600974	0.493235	-0.649876	1.98299	-0.452179	4.9335	57.2142	1.20959e-06	9.43702e-05	AL117417	splicing factor, arginine/serine-rich 15	SFRS15	57466	0.0049151
233934_at	0.00237928	-0.00649689	-0.00462507	0.00645252	0.00693769	-0.00158737	0.00161269	0.00236982	-0.00260849	-0.0010363	0.00105406	-0.476878	-0.323963	-0.346386	2.35841	-0.756487	4.29803	64.3135	7.20816e-07	7.25831e-05	AF279773	Hypothetical protein LOC349160	LOC349160	349160	0.00462507
233955_x_at	-0.00413544	-0.00429837	-0.00748124	0.00423712	5.96583e-06	0.00293875	-0.00149547	-0.00111055	0.00142379	0.000399172	0.00181497	1.48933	0.156565	0.184998	0.525363	-2.0151	9.40518	57.7298	1.1626e-06	9.16205e-05	AK001782	CXXC finger protein 5	CXXC5	51523	0.00748124
234032_at	0.00163078	-0.00953652	-0.00347689	0.000783878	-0.00206951	0.00317323	-0.0012834	-0.00104327	-0.00128487	0.0003797	0.000662436	-0.719374	3.18179	-0.193325	2.1869	-1.67027	5.86362	95.8174	1.21653e-07	2.74117e-05	AF119847	---	---		0.00347689
234192_s_at	0.00493509	-0.00361198	0.00251246	0.00345279	0.00658273	-0.00280704	0.0037881	0.00100133	-0.0018382	-4.06357e-05	-0.000491255	-1.74887	-0.468511	-0.131872	2.20073	0.525805	6.6823	76.677	3.29724e-07	5.04477e-05	AK026487	G kinase anchoring protein 1	GKAP1	80318	-0.00251246
234464_s_at	0.00606965	-0.00279352	0.00148262	-0.00120997	0.00156521	0.00141681	-0.00075922	0.000107973	-0.000909369	-0.00101568	-5.57998e-05	-1.68636	1.31788	-0.956362	1.52874	0.865478	7.66846	55.6958	1.36204e-06	9.95781e-05	AK021607	essential meiotic endonuclease 1 homolog 1 (S. pombe)	EME1	146956	-0.00148262
234649_at	0.00239814	-0.00830058	-0.0058635	0.00155079	0.00167776	0.00251429	-0.00113439	0.00170946	0.00231396	-0.00139531	0.000614414	-0.498136	1.91691	-0.827966	2.41238	-1.19711	5.10057	70.8155	4.6991e-07	5.819e-05	AK026259	---	---		0.0058635
234723_x_at	0.000700569	-0.00841233	0.00696745	0.0036607	-0.00121032	0.0018239	0.00176443	0.00163922	-0.00138462	-0.000454924	-2.54034e-05	-1.73325	1.5906	2.12144	1.16739	-0.989504	8.18869	74.0813	3.8444e-07	5.51062e-05	AK024881	---	---		-0.00696745
234733_s_at	0.0062425	-0.000984874	0.000796479	-0.00204406	0.000953596	4.78681e-05	-0.00279481	0.00126817	0.000504579	0.000160329	0.00123853	-1.36656	1.05814	-1.2025	1.15794	1.04356	5.90606	53.6193	1.61035e-06	0.000106655	AK001672	Fanconi anemia, complementation group M	FANCM	57697	-0.000796479
234986_at	0.00608943	0.00218852	0.00111065	-0.00110967	0.00285186	0.0014927	-0.00057973	0.00218591	-0.000696688	-0.00104846	-0.000780456	-1.61389	0.159179	-1.69014	1.18391	1.89831	5.94698	50.3814	2.11782e-06	0.000121748	AA630626	glutamate-cysteine ligase, modifier subunit	GCLM	2730	-0.00111065
234996_at	0.00302296	0.00780671	0.00539622	-0.00403715	0.000166434	-6.71341e-05	9.61055e-05	0.000108639	-4.0091e-05	0.00165372	-0.00099708	-0.979447	-1.00865	-0.824028	-1.53936	2.89125	4.70709	120.63	4.31714e-08	1.73487e-05	AI478743	calcitonin receptor-like	CALCRL	10203	-0.00539622
235004_at	0.00478714	-5.78268e-05	0.00654807	0.000472123	0.00594795	-0.00170868	0.00377195	0.00488857	-0.000804402	0.000496319	-0.00103296	-1.92429	-0.633181	0.0947707	1.0794	1.35256	7.20969	55.5246	1.38066e-06	0.000100167	AI677701	RNA binding motif protein 24	RBM24	221662	-0.00654807
235020_at	0.00573862	-0.000410954	0.00476106	-0.00353803	-0.000945193	0.00212164	0.00130702	0.00075058	0.000305139	-0.000192129	0.00095415	-2.02235	1.52445	-0.654393	0.613595	1.5414	6.92516	51.0606	1.99681e-06	0.000118645	AI366784	TAF4b RNA polymerase II, TATA box binding protein (TBP)-associated factor, 105kDa	TAF4B	6875	-0.00476106
235027_at	0.00388346	-0.00124492	-0.000760511	0.00759091	0.00845686	-0.00388645	0.00535126	0.0038349	-0.00125195	-0.00137125	-0.000614144	-0.902213	-1.7734	-0.304955	2.07363	0.31423	5.60903	66.8813	6.05852e-07	6.65742e-05	R52023	---	---		0.000760511
235048_at	0.00541301	-0.00477585	0.00229491	-0.00208813	0.00168949	-4.58792e-05	0.00201112	0.00310152	-0.000918664	-2.42653e-05	6.85936e-05	-2.66438	2.2212	-0.693948	2.35178	0.81876	7.87817	111.861	6.06578e-08	1.96018e-05	AV720650	family with sequence similarity 169, member A	FAM169A	26049	-0.00229491
235061_at	0.00424719	0.00377998	0.00672225	-0.00587053	0.00176467	-0.00186817	0.00108956	0.002859	0.00184179	-0.000234965	-0.000885403	-1.6743	0.126755	-0.46777	-0.459448	2.25019	6.96974	58.9136	1.06285e-06	8.80813e-05	AV706522	protein phosphatase, Mg2+/Mn2+ dependent, 1K	PPM1K	152926	-0.00672225
235092_at	0.00352233	0.0073759	0.00493479	-0.00409832	9.52207e-05	-0.000969919	-0.00111628	0.000218953	-0.000338746	0.000395495	-0.00014467	-0.68092	-0.503635	-0.666794	-0.798658	1.82577	4.86389	67.9463	5.64789e-07	6.48001e-05	AI919519	---	---		-0.00493479
235117_at	0.00566936	0.00331756	0.00290708	-0.00321357	0.00194399	-0.000276258	-0.000468783	0.00313559	-0.000295728	0.000292052	0.000116139	-2.66071	0.27084	-2.31826	0.826078	3.56522	7.10625	236.183	2.05351e-09	4.63466e-06	AI191897	ChaC, cation transport regulator homolog 2 (E. coli)	CHAC2	494143	-0.00290708
235126_at	0.00503877	-0.00613773	-0.00105568	-2.01653e-05	0.000862791	0.00161039	0.000324351	0.00403757	-0.00044994	0.00098166	0.000899084	-1.3867	1.69319	-0.736549	1.95111	0.0125915	7.6807	75.9676	3.43678e-07	5.12823e-05	N51468	non-protein coding RNA 292	NCRNA00292	642946	0.00105568
235147_at	0.00556552	0.0036273	0.00249559	-0.00384484	0.00286033	-0.00126363	-0.000699761	-0.000116636	-0.000596525	0.000227551	0.000734521	-1.45897	0.00105218	-1.49913	0.446354	2.16047	5.23892	100.084	1.0004e-07	2.45372e-05	R56118	Hypothetical protein LOC100288092	LOC100288092	100288092	-0.00249559
235177_at	0.00611164	-0.000567627	0.00268084	-0.00181578	0.00163577	0.00175654	-0.00225736	0.00187919	-0.000741325	0.000487271	-0.000507869	-2.39	1.48263	-1.49189	1.56694	1.84576	7.52006	58.62	1.08659e-06	8.88706e-05	AI625022	family with sequence similarity 119, member A	FAM119A	151194	-0.00268084
235199_at	0.00395734	-0.00781995	-0.00288383	0.000535447	0.00169376	1.81491e-05	-0.00194783	-0.00129691	-0.00141107	-0.000938309	-0.000547107	-1.37141	2.36916	-0.944104	2.88834	-0.714469	5.13809	54.2801	1.52575e-06	0.000104791	AI969697	ring finger protein 125	RNF125	54941	0.00288383
235230_at	0.00599302	0.00138032	-0.000844988	-0.00477563	0.000993781	-0.000610771	-0.00185464	7.28986e-05	-0.000571089	-3.67852e-05	0.000543425	-0.826192	0.725048	-1.31521	0.598148	1.06255	5.38996	52.7024	1.73737e-06	0.000111079	AW170015	phosphatidylinositol-specific phospholipase C, X domain containing 2	PLCXD2	257068	0.000844988
235260_s_at	0.00541415	0.00446112	-0.00198251	-0.000175169	0.00431398	-0.00162169	-0.0024342	0.000770179	0.000952596	-0.00131191	-0.00135059	-0.59444	-0.706057	-1.65053	0.825936	1.37952	6.93947	52.8232	1.71996e-06	0.0001109	AA398590	PARK2 co-regulated-like	PACRGL	133015	0.00198251
235273_at	0.00338522	0.00577946	0.006691	-0.00612094	-0.00183646	0.00125813	-0.000342272	0.000499612	0.00102721	-0.00111471	0.000271791	-1.15706	0.395543	-0.472446	-1.3102	2.21364	5.53096	116.176	5.11505e-08	1.84999e-05	AI674107	dyslexia susceptibility 1 candidate 1	DYX1C1	161582	-0.006691
235342_at	0.00338842	0.00760545	0.00453745	-0.00439084	0.00110144	-0.00074665	0.000230666	0.000981798	0.000899488	0.000137099	-0.000303615	-1.51581	-1.55584	-1.65788	-1.85567	4.37679	5.77583	451.342	1.06885e-10	1.94578e-06	AI808090	sparc/osteonectin, cwcv and kazal-like domains proteoglycan (testican) 3	SPOCK3	50859	-0.00453745
235363_at	0.00561938	-0.00408673	-0.0006578	-0.0034397	0.000904118	0.00281584	-0.000101019	0.00178419	-0.000754936	-0.00122805	0.000352756	-2.25047	3.12682	-1.81522	2.35894	0.845719	6.82289	95.413	1.23984e-07	2.76372e-05	BF108778	---	---		0.0006578
235387_at	0.00528694	0.00388764	0.0011244	-0.00523046	0.00357548	-0.00184128	-0.00073949	0.00226772	-0.00115482	0.00141901	-0.000781862	-0.873693	0.0154535	-1.25624	0.295206	1.50923	6.61153	54.3837	1.51299e-06	0.000104594	AA740875	glutathione S-transferase, C-terminal domain containing	GSTCD	79807	-0.0011244
235436_at	0.00614794	-0.000470354	0.00328653	-0.0016836	0.000547741	-2.61788e-05	0.00128521	0.00083276	-0.00139224	0.000705538	0.000843629	-1.83747	0.856353	-0.833996	1.08848	1.38236	6.0769	51.2069	1.97187e-06	0.000118256	BE503800	DEAD (Asp-Glu-Ala-Asp) box polypeptide 31	DDX31	64794	-0.00328653
235463_s_at	0.00563713	0.00284956	0.00143783	-0.00532506	0.000463537	0.00156331	-0.00100028	0.00276462	0.00152062	-0.00174647	0.000572285	-1.00556	0.737975	-1.23414	0.230976	1.42834	6.04103	66.3438	6.27952e-07	6.80047e-05	AI081356	LAG1 homolog, ceramide synthase 6	LASS6	253782	-0.00143783
235498_at	0.0056002	0.001229	0.00127166	0.00203757	0.00618144	-0.00426248	0.00134909	0.00103254	-0.00301634	0.00241233	0.00135167	-1.12428	-0.900558	-0.796054	1.31062	1.08142	4.80302	51.5865	1.90888e-06	0.000116723	AI269596	leucine-rich repeats and IQ motif containing 3	LRRIQ3	127255	-0.00127166
235513_at	0.00402127	-0.00736563	-0.00127457	0.00332683	0.00360944	-0.00273442	0.00031608	-0.000169536	0.000422196	0.000344642	-0.000405017	-1.50967	0.931737	-0.376163	2.96555	-0.527162	6.67558	55.6048	1.3719e-06	9.98979e-05	AW131450	---	---		0.00127457
235545_at	0.00588244	-0.00189191	-0.00154034	-0.00178971	0.00529014	-0.000415539	-0.000140763	0.00123822	-0.00148159	0.000476825	-0.000101265	-1.96689	0.942704	-2.22005	2.73522	1.30921	7.38633	81.1676	2.55743e-07	4.43393e-05	AI810054	DEP domain containing 1	DEPDC1	55635	0.00154034
235548_at	-0.0057346	-0.00161244	0.000933597	0.00529469	-0.00150051	-0.00121872	0.00445317	1.32469e-05	0.000159943	-0.00107727	8.67333e-05	0.77773	-0.919062	1.47819	-0.510706	-1.11636	6.36145	54.5393	1.49406e-06	0.000104475	BG326592	adenomatosis polyposis coli down-regulated 1-like	APCDD1L	164284	-0.000933597
235591_at	0.0027398	-0.00541184	-0.00557466	0.00677938	0.00737517	-0.00138313	0.000731225	0.00017721	0.000140818	-8.03096e-05	-0.000151627	-0.543417	-0.755897	-0.927214	3.51715	-0.93124	4.62209	88.0871	1.7737e-07	3.51471e-05	R62424	somatostatin receptor 1	SSTR1	6751	0.00557466
235616_at	-0.00591579	0.000629906	0.00248944	0.00317196	-0.00333315	0.00178196	0.00293225	-0.00127224	0.000111204	-0.00129924	-0.00079202	1.39385	-1.1009	2.38208	-1.91978	-1.33509	5.8485	76.2085	3.3886e-07	5.09812e-05	AI694059	teashirt zinc finger homeobox 2	TSHZ2	128553	-0.00248944
235666_at	-0.00620697	0.00143008	-0.00123985	0.00147242	-0.00183256	-0.00119615	0.00151669	-0.00163381	-0.00085852	-0.00183479	0.000848778	2.05876	-1.39415	1.50672	-1.7902	-1.40506	6.05699	78.4766	2.97299e-07	4.78949e-05	AA903473	integrin, alpha 8	ITGA8	8516	0.00123985
235798_at	0.00536678	0.00421726	0.00281515	-0.00229093	0.0035069	-0.00221641	0.000239131	0.00315214	-0.00131366	0.000853489	-0.000551959	-1.95562	-0.878168	-1.77521	0.724014	2.94914	5.41196	193.422	5.0925e-09	6.62182e-06	BE671123	transmembrane protein 170B	TMEM170B	100113407	-0.00281515
235931_at	0.00610753	0.0012936	0.000484044	-0.0013221	0.00400156	0.000224259	-0.00214169	0.00129064	-0.00157926	0.000326509	-0.000604837	-1.59921	0.245408	-1.81697	1.47055	1.74836	7.27768	76.0717	3.41586e-07	5.12366e-05	AI332764	family with sequence similarity 119, member A	FAM119A	151194	-0.000484044
236121_at	0.00294249	0.00828297	0.00441745	-0.00375936	0.000999523	-0.000739329	-0.000843829	-6.05248e-05	0.000607979	0.000860392	0.000543776	-0.826799	-1.4472	-1.1742	-1.57302	3.14068	5.07737	155.266	1.37965e-08	1.0182e-05	AI805082	olfactory receptor, family 51, subfamily E, member 2	OR51E2	81285	-0.00441745
236140_at	0.00570515	0.00369996	0.000390626	-0.00100513	0.00435737	-0.000336674	-0.00165946	0.00172631	-0.000319233	0.00264925	-0.000523866	-1.23295	-0.551307	-1.82276	1.00509	1.96183	6.08988	73.1389	4.07005e-07	5.60371e-05	AI753488	glutamate-cysteine ligase, modifier subunit	GCLM	2730	-0.000390626
236180_at	0.00103717	-0.00949708	-0.00465663	0.0027824	0.00132904	0.000429874	-1.22135e-05	0.0016807	0.000630949	-0.000758526	0.000853707	-0.347443	1.35939	-0.07668	1.92429	-1.33742	5.97825	85.5985	2.01647e-07	3.75855e-05	W57613	---	---		0.00465663
236219_at	0.00518259	0.00498399	0.00106342	-0.00256427	0.00474097	-0.00137007	-0.00124939	0.0017025	0.000392573	-0.000861809	-0.00110366	-0.971072	-0.70604	-1.53882	0.465434	1.92201	5.28364	115.167	5.32019e-08	1.86967e-05	AI452512	transmembrane protein 20	TMEM20	159371	-0.00106342
236356_at	0.00578188	0.00127646	0.00269979	-0.0049773	0.00151813	-0.000232097	-0.000930648	0.0015519	0.00134324	0.00474446	-0.000870974	-1.52743	0.937391	-1.22863	0.565798	1.65685	6.26038	61.4716	8.8065e-07	8.02099e-05	AI808395	NADH dehydrogenase (ubiquinone) Fe-S protein 1, 75kDa (NADH-coenzyme Q reductase)	NDUFS1	4719	-0.00269979
236471_at	0.0039607	-0.00752616	-0.00312745	0.00038446	0.00203958	-0.000317228	6.92067e-05	0.00406998	-0.00396388	-0.000210938	-5.5002e-06	-1.16757	1.72989	-0.778707	2.44025	-0.516755	5.64346	54.267	1.52738e-06	0.000104791	AI949827	nuclear factor (erythroid-derived 2)-like 3	NFE2L3	9603	0.00312745
236526_x_at	0.00456033	0.00628129	0.003489	-0.00416631	-9.84864e-05	-1.03445e-06	0.000376048	0.000414063	-0.000704293	-0.000882604	0.000309484	-0.858037	-0.193256	-0.972612	-0.426052	1.8549	4.97046	54.2933	1.52412e-06	0.000104791	BE222610	chromosome 5 open reading frame 44	C5orf44	80006	-0.003489
236532_at	0.0035843	0.00700083	0.00470226	-0.0052384	0.00117209	-0.000816955	-0.00133898	-0.000270067	0.00104039	-0.000873472	-0.000833275	-0.803504	-0.427663	-0.864461	-0.878949	2.10833	4.27982	97.9347	1.10285e-07	2.6187e-05	H24398	chromosome 11 open reading frame 87	C11orf87	399947	-0.00470226
236641_at	0.00607509	-0.00286358	-0.00083877	-0.000985481	0.00210233	-0.000600478	-0.00120452	0.00103478	-0.000806788	0.000325954	-3.61626e-05	-2.48084	1.92812	-2.21639	3.08335	1.26017	6.64066	146.576	1.7906e-08	1.19256e-05	AW183154	kinesin family member 14	KIF14	9928	0.00083877
236824_at	0.00264071	-0.00883178	-0.003548	0.000209914	2.73339e-05	0.00311208	-0.00318924	0.00228117	-0.00140774	-0.000158622	0.000114073	-1.01849	3.23851	-0.733388	2.62476	-1.32192	4.72859	100.05	1.00192e-07	2.45372e-05	AI435595	transmembrane protein 132B	TMEM132B	114795	0.003548
236894_at	0.00271653	-0.00916296	-0.00248926	-0.000294491	-0.00169181	0.00259375	-0.000766643	0.000918361	-0.000456289	-0.00135304	0.000562627	-1.34133	3.79511	-0.424899	2.63922	-1.39992	6.88593	197.978	4.58142e-09	6.12362e-06	AI203404	LINE-1 type transposase domain containing 1	L1TD1	54596	0.00248926
236924_at	0.00350624	-0.00837584	-0.00209622	0.00295455	5.22507e-05	0.000915649	0.00186738	-0.000163634	-0.00130626	-2.29944e-05	0.000622847	-1.29831	1.84578	-0.249705	2.62812	-0.902558	5.71063	50.3657	2.12071e-06	0.000121786	AA814383	---	---		0.00209622
237169_at	0.00273988	-0.00591217	-0.004305	0.0070223	0.00699378	-0.00313281	0.000800324	0.00070929	-0.000344511	-0.00113705	0.000104145	-0.535577	-0.553083	-0.406972	2.46222	-0.650228	4.27284	78.8915	2.90383e-07	4.75796e-05	AI266750	---	---		0.004305
237180_at	0.00047266	-0.0102708	0.000935364	-0.000597185	-0.00257144	0.00102509	0.00119114	0.00138743	-0.000178028	-0.00385546	0.00062117	-0.903597	2.52959	0.864376	1.22011	-1.32926	6.53076	52.0916	1.82881e-06	0.000113417	T97717	Proteasome (prosome, macropain) activator subunit 4	PSME4	23198	-0.000935364
237192_at	0.00285511	-0.0085072	-0.00444159	-0.000117125	-0.000914776	0.00226676	-0.00271985	0.00171103	-0.0021749	0.000278453	-1.06855e-05	-1.01916	3.63153	-1.08443	2.89705	-1.39976	4.81226	203.276	4.06334e-09	5.93951e-06	AI435590	---	---		0.00444159
237193_s_at	0.00307577	-0.00857607	-0.00410849	0.000502171	0.00034401	0.0014861	-0.00150836	0.00132005	-0.000104959	0.000945402	0.000207792	-1.37057	3.67197	-1.13327	3.66747	-1.54289	5.57859	377.653	2.41421e-10	2.07018e-06	AI435590	---	---		0.00410849
237203_at	0.00134493	-0.00680433	-0.00305286	-0.00667285	-0.00635031	0.00598772	-0.00470848	0.00309763	0.000637337	-0.0010281	0.000658036	-0.301518	3.45582	-0.612397	0.317362	-0.653732	5.00612	58.4136	1.10366e-06	8.9302e-05	BE466578	---	---		0.00305286
237275_at	0.00121316	-0.00896089	-0.00302415	-0.00438015	-0.00275604	0.00386444	-0.00425915	0.00142845	0.000837121	0.00143227	-0.000226932	-0.638617	4.5755	-0.529861	1.41895	-1.47928	5.6787	66.5148	6.20814e-07	6.76737e-05	AI950472	---	---		0.00302415
237383_at	0.00209987	-0.00928642	-0.00383217	-0.000582698	-0.00184277	0.00154992	-0.00232223	0.000764329	-0.00224975	-0.000922076	-0.00074197	-0.721226	2.99862	-0.468091	2.01653	-1.31061	5.65663	115.05	5.34444e-08	1.86967e-05	AI768144	---	---		0.00383217
237449_at	0.0031853	-0.00617483	-0.00471317	0.00594105	0.00547028	-0.00267808	0.00153119	0.00254204	-0.00208878	0.000537248	-0.000782562	-1.13845	-0.302621	-1.00428	4.54587	-1.12174	4.44797	233.985	2.14281e-09	4.63466e-06	BF447038	Sp8 transcription factor	SP8	221833	0.00471317
237483_at	0.00140946	-0.00915263	-0.00534787	0.00208933	0.00102478	0.00170097	0.00120664	0.00209166	0.000321098	-0.000759787	0.000520878	-0.49643	2.11313	-0.376707	2.72745	-1.77511	6.37736	72.2662	4.29354e-07	5.74039e-05	AI990790	---	---		0.00534787
237491_at	0.00190227	-0.00926083	-0.00162153	-0.00197765	-0.00355148	0.00307804	-0.00431221	0.000125441	-0.000360219	-0.000711832	3.28968e-05	-0.576165	2.39426	-0.124024	0.962217	-0.780718	4.84275	56.9931	1.23044e-06	9.51816e-05	AA700633	---	---		0.00162153
237591_at	0.00195304	-0.00913488	-0.00438762	-0.00229752	-0.00152635	0.00151887	-0.00258226	1.7603e-05	-0.000604087	0.000306678	-0.000868463	-0.563517	3.01647	-0.611613	1.74065	-1.19466	6.15217	73.2681	4.03817e-07	5.58321e-05	AI821565	non-protein coding RNA 173	NCRNA00173	100287569	0.00438762
237778_at	0.00299314	-0.0084413	-0.00426367	0.000372273	-0.000681422	0.00279087	-0.00276271	0.000584736	0.000341522	0.000306524	0.000403199	-0.831918	2.77312	-0.839358	2.30647	-1.07053	5.14768	126.807	3.44625e-08	1.57084e-05	BG054792	---	---		0.00426367
237885_at	0.00363175	0.00726097	0.00364885	-0.00422037	0.00402134	-0.000680192	-0.000532967	0.000376029	3.32009e-05	-0.00158712	0.000520041	-1.12756	-1.51981	-1.57568	-0.871566	3.26566	5.01075	95.1937	1.2527e-07	2.77729e-05	AW589793	---	---		-0.00364885
237911_at	-0.00082933	-0.00716623	0.00388857	-0.00672713	-0.00670695	0.00571491	-0.00151567	-0.000570763	0.00126948	-0.000631664	-0.000276534	-1.19913	6.85939	1.8199	-1.11494	-1.5573	5.16607	105.426	7.91908e-08	2.1478e-05	BF057809	---	---		-0.00388857
237939_at	0.00316536	0.00799418	0.00405825	-0.00404311	0.00153389	-0.00205428	-0.000138703	-0.00159636	0.00012258	0.000158243	-0.000173166	-0.768366	-1.34183	-1.10384	-1.18788	2.74346	4.55034	92.4134	1.43081e-07	2.98045e-05	BE218107	EPH receptor A5	EPHA5	2044	-0.00405825
237974_at	0.00315288	-0.00763109	-0.00499092	0.00371462	0.00301377	-0.000913877	-0.000370584	0.000947842	-0.00256544	0.00033035	-0.000986821	-0.709408	0.966269	-0.710584	2.63546	-0.895936	4.23448	112.008	6.03014e-08	1.96018e-05	BE502594	abhydrolase domain containing 12B	ABHD12B	145447	0.00499092
238026_at	0.00519891	0.00197365	0.00569733	-0.000207279	0.00442714	-0.00405347	0.00180827	0.00190961	0.00094626	0.000288827	0.00160881	-1.19627	-0.547772	-0.235776	0.553533	1.16702	7.28477	53.96	1.56603e-06	0.000105587	AI458020	ribosomal protein L35a	RPL35A	6165	-0.00569733
238058_at	0.00170174	0.00810357	0.006873	-0.00368271	0.00130892	0.000323281	-0.000356525	0.00276527	0.00152154	-0.000282788	-0.000727615	-0.901105	-1.65161	-0.213818	-2.20783	3.06607	6.43164	64.0652	7.33291e-07	7.29457e-05	AA603041	hypothetical LOC150381	LOC150381	150381	-0.006873
238156_at	0.0048398	-0.00646657	0.00247886	-0.00206973	-0.000838145	8.74461e-05	-0.000634876	0.000344161	-0.000534698	-0.000510301	-0.000489203	-1.76372	2.25075	-0.256353	1.50764	0.179282	7.69626	70.7905	4.70649e-07	5.819e-05	AW205632	---	---		-0.00247886
238299_at	0.00432259	-0.00747715	-0.00228943	-0.00133822	0.000228708	-0.000680721	-0.00136449	0.0011173	0.000359272	-0.000213078	0.000207636	-0.931042	1.67663	-0.611491	1.55653	-0.25786	6.01962	50.2185	2.14815e-06	0.000122588	AW005866	---	---		0.00228943
238303_at	-0.000562402	-0.00976645	0.00253503	0.000163882	-0.00410706	0.00312636	0.00176768	0.0012747	-0.00141657	-0.00257531	0.000148512	-0.52983	1.65388	0.889235	0.493846	-0.943516	4.8455	50.5939	2.07902e-06	0.000120651	AW070371	STT3, subunit of the oligosaccharyltransferase complex, homolog B (S. cerevisiae)	STT3B	201595	-0.00253503
238441_at	0.00580669	1.19924e-05	0.00277366	0.00013869	0.00411634	-0.000888208	0.00217002	0.00610638	-0.00178692	-6.2436e-05	-0.000778562	-1.81901	-0.113658	-0.819123	1.49611	1.40557	5.98924	52.4328	1.77703e-06	0.000111205	AI928203	protein kinase, AMP-activated, alpha 2 catalytic subunit	PRKAA2	5563	-0.00277366
238529_at	0.00496234	-0.00436893	-0.00303314	0.00366479	0.00558333	-0.00189697	0.00152449	-0.000124887	-2.05841e-05	0.00175415	-0.00101498	-0.838614	0.00472245	-0.74263	1.92337	0.0498821	5.13305	50.3058	2.13182e-06	0.000122039	AA573088	Hypothetical LOC730631	LOC730631	730631	0.00303314
238622_at	0.00523739	0.00390202	0.00257841	-0.00417326	0.00361756	-0.000171897	-0.0014734	0.00459698	0.000115635	-0.0017115	-1.94234e-05	-1.0619	-0.0126696	-1.13195	0.267455	1.64246	6.12369	49.475	2.29352e-06	0.000126615	AW269686	RAP2B, member of RAS oncogene family	RAP2B	5912	-0.00257841
238632_at	0.00264558	-0.00692517	-0.00560068	0.00499411	0.00561997	-0.00110208	0.000942977	0.00225583	0.000278661	-0.000342823	0.00113761	-0.579239	0.210773	-0.735559	3.02326	-1.01615	4.53524	112.993	5.79694e-08	1.91598e-05	AI631657	hypothetical LOC100505946	LOC100505946	100505946	0.00560068
238681_at	0.00592119	0.00305463	0.0015051	-0.00253095	0.00199524	-0.000638806	0.00103225	0.00212825	-0.00065149	-0.000484001	-0.000306276	-1.2176	0.0236901	-1.25864	0.642141	1.6207	5.90934	71.1709	4.59558e-07	5.76028e-05	R46180	glycerophosphodiester phosphodiesterase domain containing 1	GDPD1	284161	-0.0015051
238732_at	0.00231778	-0.00575852	-0.00592779	0.00809326	0.00482924	-0.00146974	0.00192028	0.00258725	-0.00091726	0.000715081	0.00164631	-0.232278	-0.363633	-0.366524	1.87371	-0.651302	4.1916	49.8353	2.22162e-06	0.000123979	AI631241	collagen, type XXIV, alpha 1	COL24A1	255631	0.00592779
238762_at	0.00398975	0.00700854	0.00484013	-0.00297807	0.000448927	0.000308152	-0.0012766	4.63149e-06	-0.000993444	-0.000532537	-0.000701841	-1.44203	-0.925883	-1.32328	-1.1101	3.37291	6.03801	54.8188	1.46078e-06	0.000103253	AA702016	methylenetetrahydrofolate dehydrogenase (NADP+ dependent) 2-like	MTHFD2L	441024	-0.00484013
239106_at	0.00622983	3.60405e-05	5.91397e-05	-0.00130302	0.00320069	0.000900131	-0.00127603	0.00226457	-0.000208335	0.000474223	-0.000564729	-1.48931	0.611808	-1.55602	1.48565	1.33229	5.99616	93.7907	1.33898e-07	2.86768e-05	AI801563	Carbonic anhydrase VB pseudogene	CA5BP	340591	-5.91397e-05
239108_at	0.00509029	-0.00543377	-0.00296045	0.00113199	0.00222345	0.0024411	0.000758534	0.00302823	-0.000932187	0.000446367	0.000484445	-1.446	1.61202	-1.28448	2.68232	-0.023237	5.7605	56.5004	1.27851e-06	9.68425e-05	H16791	Fatty acyl CoA reductase 2	FAR2	55711	0.00296045
239206_at	-0.000725192	-0.0054797	0.000312784	-0.00861015	-0.00853403	0.00728357	-0.00254302	-0.000367541	8.46379e-05	0.000868006	0.00145356	-0.103945	2.97708	0.104485	-0.623908	-0.542134	4.38051	52.6464	1.74552e-06	0.000111079	BE552138	complement component (3b/4b) receptor 1-like	CR1L	1379	-0.000312784
239231_at	0.0050697	-0.00606875	-0.00193499	-0.000476136	0.00182343	0.00183945	-0.000365837	-0.000102022	-0.00168972	5.84777e-05	-0.000640194	-1.70241	2.29011	-1.25435	2.68152	-0.0124055	6.90861	77.7838	3.093e-07	4.88203e-05	BE464819	---	---		0.00193499
239292_at	0.00275402	-0.00738402	-0.00718875	0.000642211	-0.00153401	0.00196901	-0.00273198	0.000696604	-0.000531164	0.000499235	0.000723299	-0.331861	2.52401	-1.35291	2.32043	-1.15449	5.35251	94.7963	1.27643e-07	2.77729e-05	AA825563	---	---		0.00718875
239303_at	0.000908788	-0.0087782	-0.00407537	0.00536622	0.00411352	-0.00154324	0.000800092	0.00133319	-0.00244441	-0.00243094	0.000786693	-0.568222	0.652077	0.165244	3.39101	-2.01997	6.11455	82.6827	2.35455e-07	4.16145e-05	AA933717	piwi-like 2 (Drosophila)	PIWIL2	55124	0.00407537
239352_at	0.00369048	0.0069494	0.00473606	-0.00451224	0.00206043	-0.00171927	0.000230551	0.000898959	0.000222261	-0.00205421	-0.000424883	-1.03476	-0.891375	-0.93434	-0.819531	2.50113	5.12665	139.526	2.23777e-08	1.29597e-05	AI368909	solute carrier family 6 (neutral amino acid transporter), member 15	SLC6A15	55117	-0.00473606
239398_at	-0.00398379	-0.00365248	0.00880957	0.00240391	-0.00161867	-0.000674845	0.0031384	0.000259953	-0.00127867	-0.00260911	-7.52171e-05	-0.358463	-0.120635	2.89854	-0.914698	-0.923885	4.48506	69.1036	5.23945e-07	6.21426e-05	AI743156	kelch-like 31 (Drosophila)	KLHL31	401265	-0.00880957
239597_at	-9.02378e-05	-0.0104432	0.000682696	0.000318473	-0.00122132	0.0012504	0.000256504	-0.00076232	0.0031502	0.000302129	-0.000525489	-1.06911	3.32435	1.3828	1.83806	-2.18625	6.71912	51.7687	1.87952e-06	0.000115592	AA993566	---	---		-0.000682696
239630_at	0.0026142	-0.00770642	-0.00491525	0.0057031	0.00211429	0.00104775	0.000383359	0.00135039	-0.00370757	-0.000259756	0.000857383	-0.596182	0.823744	-0.458906	2.59008	-1.09918	4.73631	50.9032	2.02409e-06	0.000119247	BF516583	---	---		0.00491525
239697_x_at	0.00249699	-0.00823864	-0.00440549	0.00428551	0.00287873	0.000872831	-0.000598739	0.00263216	-0.00390212	0.000964666	5.49783e-05	-0.577495	0.930876	-0.368948	2.19101	-0.947508	4.70138	60.2489	9.62557e-07	8.42438e-05	AA521262	chromosome 3 open reading frame 67	C3orf67	200844	0.00440549
239776_at	0.00357719	-0.00798487	-0.00412509	-0.000200319	0.000346773	0.00158854	-0.00133145	0.00221111	0.00159421	0.000645246	4.01077e-05	-0.721236	1.78748	-0.691668	1.73435	-0.569711	3.87321	86.0836	1.96611e-07	3.71541e-05	AI027091	transmembrane protein 232	TMEM232	642987	0.00412509
239781_at	0.00272719	-0.00761401	-0.00525276	0.00408458	0.00386445	-0.000732795	0.00208401	0.00286562	-0.000545215	0.000269601	-0.000272881	-0.830159	0.851866	-0.738403	3.45426	-1.26437	5.85797	96.5036	1.17819e-07	2.71195e-05	AA514237	hypothetical LOC100509655	LOC100509655	100509655	0.00525276
239847_at	0.00572171	-0.00210369	-0.00053004	-7.38226e-05	0.00591162	-0.00293041	0.00164097	0.00202453	-0.00266491	-0.001255	-4.77742e-05	-1.4054	0.0478998	-1.08396	1.95102	0.811392	5.48262	52.9029	1.70858e-06	0.000110724	AA631103	---	---		0.00053004
239913_at	0.00321836	-0.00571615	-0.00467462	0.00648989	0.00635441	-0.000906255	0.00107959	0.00224124	-0.00322496	0.000594482	-0.000888639	-0.521987	-0.248357	-0.521984	2.17564	-0.497663	4.0073	61.4627	8.81218e-07	8.02099e-05	AI421796	solute carrier family 10 (sodium/bile acid cotransporter family), member 4	SLC10A4	201780	0.00467462
239960_x_at	0.00405782	0.00478178	0.0037741	-0.00809671	-0.00101251	0.000343499	-0.0031997	0.00327821	6.56582e-05	-0.000460572	0.000804971	-0.949875	0.914514	-1.12045	-0.779313	1.91154	5.16036	66.9234	6.04162e-07	6.65223e-05	AW303539	Lyrm7 homolog (mouse)	LYRM7	90624	-0.0037741
239975_at	0.00271269	-0.00869126	-0.00349605	-0.00155308	-0.00172402	0.00221372	-0.004121	0.00131888	-0.000422973	0.000594173	0.000187885	-1.18095	4.52407	-1.03807	2.70245	-1.43666	5.07907	157.201	1.30438e-08	9.75837e-06	BF057731	major histocompatibility complex, class II, DP beta 2 (pseudogene)	HLA-DPB2	3116	0.00349605
240117_at	-0.00254096	-0.00798863	0.0059656	0.0024945	-0.00179063	0.00150743	0.00358288	-0.000106444	0.000713486	0.000138872	0.00067829	-0.521919	0.891106	1.89815	0.161723	-1.14837	6.83477	67.4996	5.81585e-07	6.53541e-05	AI184988	fibrillin 3	FBN3	84467	-0.0059656
240168_at	-0.00169043	-0.00883561	0.00510556	-0.00104259	-0.00422817	0.00207459	0.000913879	-0.000448254	0.00178727	-0.00200332	-0.000913924	-0.560323	1.77975	1.38924	0.0582415	-0.997915	4.65791	57.9357	1.14445e-06	9.04516e-05	AA679589	exportin 7	XPO7	23039	-0.00510556
240170_at	0.00482218	-0.00603217	-0.00305121	-0.00181423	0.000675346	0.00271603	-0.00261757	0.000221786	-0.00220079	-0.0015838	-0.00145417	-0.801947	1.63194	-0.888538	1.36517	-0.0597876	5.39615	51.0479	1.999e-06	0.000118645	H71224	---	---		0.00305121
240186_at	0.000485613	-0.0063682	0.0011449	-0.00797009	-0.00802656	0.00606152	-0.003884	-0.00107453	-8.94355e-05	-0.002114	2.2435e-05	-0.549838	4.22264	0.080492	-0.444105	-0.615301	4.17545	116.821	4.98899e-08	1.84097e-05	BF510309	---	---		-0.0011449
240231_at	0.00216112	-0.00957591	-0.00164597	0.00184049	-0.00129387	0.00150426	0.00292559	0.00111213	-0.00123846	0.000593771	0.000476038	-1.2228	2.52856	0.270504	2.45195	-1.43501	5.59483	54.3043	1.52276e-06	0.000104791	AI742383	---	---		0.00164597
240239_at	0.00617197	0.000920507	0.000314616	0.000308595	0.00344863	-0.00176927	0.000839978	0.00228803	0.00127025	0.00262797	-0.00126103	-1.10848	-0.139665	-1.04332	1.16891	1.07131	4.7294	52.4671	1.77193e-06	0.000111205	N63953	zinc finger protein 566	ZNF566	84924	-0.000314616
240267_at	0.00323974	-0.00801735	-0.00515369	-0.000615773	-0.000239472	0.00180167	-0.00156767	0.00151664	-0.000225484	0.000211008	-0.0004378	-0.730532	2.46039	-1.00822	2.17232	-0.865664	5.66184	153.653	1.44643e-08	1.0394e-05	AI686283	---	---		0.00515369
240301_at	0.00200475	-0.00947298	-0.00234392	0.000608918	-0.000961023	0.00225238	-0.00437358	0.00106588	-0.000866639	-0.00180343	0.000791247	-0.939721	3.13063	-0.221928	2.21851	-1.43488	5.49683	56.8021	1.24881e-06	9.57884e-05	AI204212	developmental pluripotency associated 2	DPPA2	151871	0.00234392
240458_at	0.00107712	-0.0100315	0.000296746	0.0029702	-0.000924173	0.000303519	0.00244303	0.0027096	0.0018621	-0.000630143	-0.00086822	-0.826673	1.4349	0.689495	1.50144	-1.11225	5.47499	62.0679	8.43796e-07	7.81055e-05	AI242023	---	---		-0.000296746
240681_at	0.00219663	-0.00956754	-0.00285892	0.000784731	-1.34458e-05	0.00129693	-0.000969889	0.00191221	0.000493191	0.000641877	-6.2325e-05	-1.3472	3.6381	-0.286526	3.31915	-1.88725	5.48589	245.006	1.73774e-09	4.63466e-06	AW118997	---	---		0.00285892
241314_at	0.00207808	-0.00746767	-0.00655684	0.00366212	0.00482478	-0.00109265	1.46196e-06	0.00283469	-0.00175867	-0.00110156	0.000316006	-0.299778	0.54344	-0.678464	2.39197	-1.02371	6.37936	57.251	1.20615e-06	9.42992e-05	AI732874	---	---		0.00655684
241509_at	0.000680417	-0.0100489	0.00158136	-0.00010856	-0.00309064	0.00301693	-0.00198627	-0.000378085	0.000712272	-0.00144245	-0.000851549	-0.840361	2.52547	0.731664	1.00117	-1.15669	4.54707	70.6892	4.73658e-07	5.83925e-05	AI637733	---	---		-0.00158136
241535_at	0.00437491	-0.00755961	-0.00115346	0.000185578	0.00134036	-0.000174376	-0.000232085	0.0019016	-0.000131	-0.00181457	0.000189435	-2.38866	3.14625	-0.918619	3.75566	-0.551449	6.93145	201.431	4.23525e-09	5.93951e-06	AA758105	hypothetical protein LOC100292909	LOC100292909	100292909	0.00115346
241550_at	-0.0011502	-0.00590717	0.00237619	-0.00767501	-0.00853097	0.00684125	-0.000775947	0.000126147	0.00058494	0.000151351	0.000236319	-0.494231	5.75727	1.05627	-1.40181	-1.1945	5.01247	72.9439	4.11875e-07	5.62343e-05	AI365263	developmental pluripotency associated 5	DPPA5	340168	-0.00237619
241575_at	-0.00269776	0.00814793	-0.0058459	-0.00106943	-0.00178958	0.00114225	-0.000767164	-0.00297942	-0.000941229	-0.000904217	-0.00024946	2.628	-2.02438	-1.47921	-2.17851	0.48527	5.81588	55.8322	1.34742e-06	9.91735e-05	AI873304	---	---		0.0058459
241673_x_at	0.000940278	-0.00442575	7.32827e-05	-0.00935109	-0.00789768	0.0064893	-0.0069989	-0.000825849	-0.000611589	0.000320612	0.000406769	-0.248396	2.94307	-0.365325	-0.470137	-0.175652	3.60663	54.971	1.44302e-06	0.000102481	AI253971	---	---		-7.32827e-05
241681_at	-0.00357604	-0.00763111	0.00247493	0.00395278	-0.00353705	0.000945587	0.00239854	-0.00235397	0.000121049	0.000986703	-0.000454205	0.0355729	0.84504	1.83201	0.159985	-1.64525	6.21799	86.5048	1.92363e-07	3.67326e-05	AW296451	---	---		-0.00247493
241687_at	0.00570822	-0.00361502	-0.001171	0.00146233	0.00415206	0.000429909	-0.00043421	0.00238477	-0.00245549	0.000493202	-0.000934631	-1.04234	0.491736	-0.811075	1.60423	0.349662	6.24501	59.4046	1.02456e-06	8.63864e-05	BE886288	---	---		0.001171
241776_at	0.00259476	-0.00906219	-0.00334843	-0.00191973	-0.000627959	0.00209667	-0.000512526	0.00137179	0.00243193	-9.43943e-06	0.000666044	-0.936591	3.0463	-0.556269	2.04347	-1.07031	5.31987	64.1293	7.30042e-07	7.28294e-05	BF511884	---	---		0.00334843
241826_x_at	0.00472203	-0.00686913	-0.000622297	-0.000912286	-0.000905779	0.00258782	-0.000636745	-0.000106408	-0.00176297	-0.0026135	0.000133461	-1.34305	2.22733	-0.607307	1.70562	-0.131605	5.37973	49.7953	2.22946e-06	0.000124116	AI758317	zinc finger protein 738	ZNF738	148203	0.000622297
241834_at	0.00521217	-0.00524195	-0.00282393	-0.00212074	0.000905795	9.92828e-05	-0.00304805	0.000659034	-0.00272269	0.000300646	0.000626578	-1.40074	2.37108	-1.60529	2.25694	0.175942	5.83072	77.8146	3.08754e-07	4.88203e-05	AW299520	imprinted in Prader-Willi syndrome (non-protein coding)	IPW	3653	0.00282393
241893_at	0.00192279	-0.00888441	-0.00485413	-0.00195233	-0.00151541	0.00251731	-0.00329363	0.00154275	-0.00112196	8.31772e-05	-0.000440411	-0.45547	2.81916	-0.672881	1.6373	-1.12719	4.98779	105.906	7.75918e-08	2.1478e-05	BE927766	---	---		0.00485413
241897_at	-4.64177e-05	-0.010249	-0.00285154	0.000842925	-0.000653863	0.00125474	-0.000686613	0.000920291	-0.000871734	-0.0008888	0.00074846	-0.614419	3.63738	0.625422	2.67725	-2.79982	6.7671	105.355	7.94332e-08	2.1478e-05	AA491949	---	---		0.00285154
241925_x_at	0.0041297	0.00703835	0.00379805	-0.00330557	0.001252	-0.000941935	0.000337985	0.000408899	0.00121434	0.00309584	-0.000851191	-0.916941	-0.819717	-1.05244	-0.562853	2.26704	4.99324	72.5683	4.21451e-07	5.69721e-05	BF207870	---	---		-0.00379805
241954_at	0.00382056	-0.00805365	-0.00226866	-0.00166597	0.000713906	-0.000447212	-0.00178653	0.00281846	-0.000473254	0.000194784	-0.000761199	-1.26936	2.49731	-0.748881	2.20357	-0.532867	6.48105	60.028	9.78322e-07	8.47896e-05	AA757900	Farnesyl-diphosphate farnesyltransferase 1	FDFT1	2222	0.00226866
242008_at	0.00375306	-0.0081148	-0.00298274	0.00105964	-4.91269e-05	0.0015724	-0.000681803	-0.00106941	-0.00184612	-0.000650729	0.00057868	-1.47977	2.95081	-0.87513	3.1085	-0.992742	5.7288	67.744	5.72322e-07	6.49818e-05	BE350312	---	---		0.00298274
242055_at	0.00310807	-0.00778964	-0.00565027	-0.000581249	-0.000180047	0.001935	-0.00333809	0.00178886	-5.99856e-05	-0.000803342	-0.000125938	-0.50519	2.0782	-0.952717	1.78565	-0.742829	4.79547	112.877	5.82375e-08	1.91598e-05	AW136397	Proteasome (prosome, macropain) assembly chaperone 4	PSMG4	389362	0.00565027
242064_at	-0.00137869	-0.00937832	0.00144114	0.0055283	0.000370341	0.000828596	0.00321644	-4.50566e-05	0.00130361	0.000819289	0.000780895	-0.450099	0.68982	1.40996	1.19789	-1.51841	6.00513	79.1281	2.86527e-07	4.73539e-05	N23651	sidekick homolog 2 (chicken)	SDK2	54549	-0.00144114
242068_at	-0.00111556	-0.00977329	0.00310694	0.000985363	-0.00384679	0.000139958	-0.000639774	-0.00123573	-3.89712e-05	0.00121319	-0.00073582	-0.697883	2.22308	1.55604	0.692671	-1.54228	5.49528	51.0456	1.99939e-06	0.000118645	AA608834	---	---		-0.00310694
242070_at	0.00268485	-0.00866989	-0.00314277	0.00306973	0.00205726	1.88772e-05	0.00113488	0.00470634	-0.0010641	-0.000563502	-0.000348564	-0.871923	1.24931	-0.209388	2.31277	-0.946767	5.84668	61.1879	8.98873e-07	8.13259e-05	AI014470	hypothetical LOC728485	LOC728485	728485	0.00314277
242128_at	0.003011	-0.00847323	-0.00434887	0.00163161	0.00162506	0.000771025	-0.0010158	0.00164159	-0.00142807	-0.000358269	-1.86711e-05	-1.51247	3.36552	-1.2247	4.5424	-1.82117	5.04517	401.679	1.82128e-10	1.98931e-06	BE779765	orthodenticle homeobox 2	OTX2	5015	0.00434887
242135_at	0.00262603	-0.00588795	-0.00350761	0.00786979	0.00680352	-0.00255471	0.00224856	0.00208368	0.00155786	-0.00105381	0.00043547	-0.870581	-0.983996	-0.290803	3.48702	-0.932229	5.04367	139.228	2.2595e-08	1.29597e-05	AA927533	hypothetical LOC100509302	LOC100509302	100509302	0.00350761
242228_at	0.00552706	-0.00429229	-0.00268269	-0.00254074	0.0013322	-0.00033483	-0.00256856	0.00127656	-0.0012075	0.000940542	0.00045412	-1.42413	2.10093	-1.7275	2.14914	0.442726	5.73436	102.163	9.12147e-08	2.31751e-05	AA825721	---	---		0.00268269
242245_at	0.00603243	-0.00234034	0.00158393	-0.00112659	0.00354539	-0.000988723	0.00031415	-0.000189057	-0.00138205	0.000150924	0.000918871	-2.01952	0.897898	-1.10661	1.9571	1.15322	6.0575	71.301	4.55837e-07	5.76028e-05	N90719	---	---		-0.00158393
242276_at	0.00296566	-0.00482561	-0.00541493	0.00695017	0.00699114	-0.00227601	0.00186952	0.00338904	-0.00269366	-0.000499015	0.000821821	-0.570524	-0.899493	-0.836088	3.14579	-0.669447	5.14867	104.529	8.22951e-08	2.19238e-05	T78081	---	---		0.00541493
242283_at	0.00562401	-0.0028032	0.000856972	0.00210143	0.00622478	-0.000733808	-0.000956351	0.000869746	-0.00114755	-0.000729436	0.000714828	-2.07296	0.10741	-1.11091	2.78034	0.924208	6.7736	52.6666	1.74258e-06	0.000111079	AI076810	dynein, axonemal, heavy chain 14	DNAH14	127602	-0.000856972
242317_at	0.0059259	0.00208017	-0.000828992	-0.00316567	0.00326445	0.00173217	-1.88283e-05	0.00306905	-0.00107277	-0.00117154	0.00011525	-1.16736	0.423264	-1.80236	1.00798	1.55586	6.03079	58.6106	1.08735e-06	8.88706e-05	H10661	HIG1 hypoxia inducible domain family, member 1A	HIGD1A	25994	0.000828992
242343_x_at	0.00014444	-0.00976644	0.00409617	0.0023985	-0.00190692	0.00146059	0.00159758	-0.00106629	-0.000762347	0.000503758	-0.000879681	-1.30631	2.18425	1.80053	1.30359	-1.49119	7.14794	103.674	8.5389e-08	2.25283e-05	H57111	---	---		-0.00409617
242348_at	0.00299194	-0.00767332	-0.00446877	0.00438381	0.00360801	-0.000905362	-0.000563287	0.0029973	-7.66497e-05	0.00118744	-5.89264e-05	-0.723507	0.763634	-0.554705	2.57735	-0.879471	4.25485	109.481	6.68261e-08	2.0334e-05	AA757457	family with sequence similarity 19 (chemokine (C-C motif)-like), member A4	FAM19A4	151647	0.00446877
242414_at	-0.000637364	-0.008113	-0.00542086	0.00737909	0.00148629	-0.000164924	0.000977963	-0.000936339	-0.000753619	-0.000497215	0.000483801	0.248474	0.405794	0.447957	3.00382	-2.68492	9.0101	143.767	1.95438e-08	1.2557e-05	AW960707	quinolinate phosphoribosyltransferase	QPRT	23475	0.00542086
242463_x_at	0.00237105	-0.00841928	-0.00408783	-0.0020012	-0.00360379	0.00474405	-0.00188292	0.00116526	-0.000731032	-0.000269873	0.00040551	-0.653044	3.40433	-0.699507	1.58407	-1.07144	5.56728	85.8376	1.99146e-07	3.73745e-05	AI620827	zinc finger protein 600	ZNF600	162966	0.00408783
242471_at	0.00250062	-0.00849697	-0.00458991	0.00397918	0.000788588	0.002102	0.00114737	-5.39011e-05	0.0007326	0.00030345	-0.000470743	-0.808162	1.80329	-0.473023	2.9921	-1.47232	5.96928	56.2136	1.30755e-06	9.77691e-05	AI916641	---	---		0.00458991
242500_at	0.003301	0.00701246	0.00576784	-0.0045991	0.00182843	0.000230608	0.00178664	-6.34442e-05	0.00133913	0.0015045	-0.000917592	-0.875309	-0.692166	-0.519945	-0.893623	2.04841	5.79896	71.7641	4.4289e-07	5.76028e-05	T87730	---	---		-0.00576784
242516_x_at	0.000676701	-0.00549051	-0.00130996	-0.00894859	-0.00690325	0.00766563	-0.00477637	-5.66869e-05	-0.000571164	0.00109141	0.00045585	-0.242789	3.88657	-0.487133	-0.346339	-0.497086	3.87018	67.5138	5.81042e-07	6.53541e-05	AA934358	RNA binding motif protein 46	RBM46	166863	0.00130996
242550_at	0.0056451	-0.00454151	0.000312376	-0.00270612	-0.00100615	4.24173e-05	0.00120142	0.001384	-0.000105771	-0.000169357	0.00056437	-2.04254	2.50631	-1.10792	1.95003	0.645702	6.88226	50.7518	2.05075e-06	0.000119912	AA628539	eukaryotic translation initiation factor 3, subunit B	EIF3B	8662	-0.000312376
242688_at	0.000594551	-0.00995182	-0.000864618	0.00446352	-0.00069457	0.00107581	0.00140118	-0.0018268	0.000397754	0.00159663	0.00123288	-0.613987	1.34561	0.68731	1.63648	-1.38374	6.71802	51.6783	1.89401e-06	0.000116222	AI149880	---	---		0.000864618
242787_at	0.00605223	-0.000733853	-0.00106069	-0.000402019	0.00522463	-0.000443033	-0.000436374	-0.000357161	0.00214375	0.000368182	-0.000855448	-1.54782	0.261777	-1.75927	2.09208	1.23869	6.27379	56.562	1.27238e-06	9.67227e-05	AI924134	---	---		0.00106069
242814_at	-0.00242953	-0.0071496	-0.00208422	-0.00482353	-0.00637327	0.00609976	-0.00347452	0.00101631	-0.000461522	-0.0030637	0.000754397	0.368274	3.34297	0.409749	-0.326693	-1.53797	6.21952	50.1751	2.15632e-06	0.00012267	AI986192	serpin peptidase inhibitor, clade B (ovalbumin), member 9	SERPINB9	5272	0.00208422
242836_at	0.00370776	-0.00710036	-0.00438435	0.00374787	0.00363193	-0.000550189	0.000842731	0.000538673	-0.000932576	-0.000398964	-0.000163545	-0.906036	0.825689	-0.766306	2.75831	-0.697196	4.59261	114.55	5.45032e-08	1.87818e-05	AI800470	---	---		0.00438435
242873_at	0.00115857	0.00898957	0.0056922	-0.00347945	0.000255446	0.00202305	0.000224547	0.000456338	-2.32933e-05	0.000213435	0.000558282	-0.425193	-1.83063	-0.403671	-2.75575	3.14168	7.58194	56.0017	1.32952e-06	9.83864e-05	BE567130	---	---		-0.0056922
242881_x_at	0.00317056	-0.00539996	-0.00440642	0.00686551	0.00664882	-0.00273559	0.00230173	0.00121787	-0.00257257	0.000588988	5.34044e-06	-1.27195	-1.2486	-1.05927	5.24043	-1.09929	4.79046	232.382	2.2109e-09	4.63466e-06	BG285837	---	---		0.00440642
242905_at	0.00622537	0.00129873	0.000337421	-0.00173241	0.0024653	-0.00126878	-5.58095e-07	0.00118854	-0.0015459	0.00100581	0.000885202	-1.54768	0.286744	-1.67128	1.33989	1.67302	5.84834	88.063	1.77588e-07	3.51471e-05	AV733347	partner of NOB1 homolog (S. cerevisiae)	PNO1	56902	-0.000337421
242909_at	0.00321818	-0.00842512	-0.00364943	-0.00138303	0.000152829	0.00204844	-0.00243944	0.00137186	-0.000712314	0.00101754	-0.000203398	-0.846902	2.47847	-0.74899	1.90733	-0.751484	4.57974	108.771	6.88106e-08	2.04237e-05	AI802969	---	---		0.00364943
242915_at	0.00193012	-0.00938615	-0.000353723	-0.00140806	-0.00420389	0.00363393	0.000887641	0.00228466	-0.00169792	0.000281214	-0.000199427	-1.60832	4.80351	0.369457	2.05517	-1.60927	6.5124	73.4262	3.99959e-07	5.58321e-05	AA603590	zinc finger protein 682	ZNF682	91120	0.000353723
243000_at	0.00535849	-0.00322944	-0.00406909	0.00011208	0.00485819	-0.00273485	0.00104774	0.00264359	0.000415077	0.000590544	-0.000683761	-1.01214	0.398272	-1.44248	2.20059	0.373981	6.10446	53.1082	1.67971e-06	0.000109598	AW194766	cyclin-dependent kinase 6	CDK6	1021	0.00406909
243154_at	0.00255894	-0.00697764	-0.00689358	0.00458014	0.00357276	-0.00109722	-0.000115735	0.00170576	-0.000653827	-0.000972663	0.00075576	-0.375623	0.619438	-0.971749	2.94599	-1.14702	6.08398	171.428	8.80777e-09	8.27475e-06	AA215381	---	---		0.00689358
243161_x_at	-0.000411075	-0.00694558	0.00274225	-0.00731381	-0.00787444	0.00511493	-0.0025271	0.000473401	0.000558315	-0.00130109	-0.000632894	-0.817953	5.43699	0.899119	-0.776172	-1.07634	4.7583	177.308	7.55836e-09	8.20899e-06	N32798	zinc finger protein 42 homolog (mouse)	ZFP42	132625	-0.00274225
243198_at	0.0041418	0.00562067	0.00422397	-0.00635465	5.61325e-05	0.00241268	-0.000617253	0.00292363	0.000759834	-0.00169056	-0.0012021	-1.05985	0.422817	-1.06661	-0.778072	2.1487	5.20172	63.6441	7.5505e-07	7.47021e-05	AA020920	testis expressed 9	TEX9	374618	-0.00422397
243233_at	0.00219585	-0.00947626	-0.00292747	0.00133602	-9.42155e-06	0.00224164	-0.000172734	0.00134058	-0.000733917	0.00264038	0.000794957	-0.812674	2.15544	-0.150416	2.05688	-1.17678	5.18277	96.1306	1.19884e-07	2.71697e-05	AI701943	---	---		0.00292747
243275_at	0.00187333	-0.00866396	-0.00288931	-0.00357323	-0.00375276	0.00424293	-0.00315344	0.00263733	0.00345011	0.000297967	-0.000724649	-0.560887	3.01751	-0.401321	1.03293	-0.866022	4.62354	59.5397	1.01432e-06	8.58835e-05	BE644666	---	---		0.00288931
243278_at	0.00335709	0.00746631	0.0043759	-0.00416393	0.00118043	-0.00207361	0.00142421	0.00391128	0.000293827	0.000583181	0.000344159	-1.46655	-1.75178	-1.42971	-1.49312	3.99903	5.15385	72.9924	4.10657e-07	5.62085e-05	AW291402	forkhead box P2	FOXP2	93986	-0.0043759
243332_at	0.00337601	-0.00804333	-0.00139955	-0.00388574	-0.00290574	0.00274601	-0.00262169	-0.0012149	-0.000896369	0.00129317	0.00112381	-0.938844	2.86066	-0.511281	1.17064	-0.454282	5.56383	58.8511	1.06785e-06	8.81667e-05	BE972639	---	---		0.00139955
243357_at	0.00210289	0.00859215	0.00484042	-0.00417144	0.00176288	-0.00129752	-0.00162694	-0.000445455	0.000569711	0.00306984	0.000206822	-0.410199	-1.21402	-0.659467	-1.36128	2.16204	5.24438	67.3463	5.87491e-07	6.57472e-05	AA115106	neuronal growth regulator 1	NEGR1	257194	-0.00484042
243416_at	0.00388196	-0.00787392	-0.00246012	0.00214644	0.0018673	-3.38857e-05	0.00111644	0.00227372	-0.00131626	8.07415e-05	7.71142e-05	-1.36369	1.65576	-0.547346	2.80246	-0.691644	6.4414	149.671	1.629e-08	1.12614e-05	W23691	---	---		0.00246012
243483_at	0.00336286	0.00746871	0.00438706	-0.00461249	0.00173543	-0.00159604	0.00060771	0.00261796	-2.35656e-05	9.92828e-06	0.000233037	-1.21163	-1.36128	-1.30186	-1.31299	3.40862	5.2339	172.109	8.65085e-09	8.27475e-06	AI272941	transient receptor potential cation channel, subfamily M, member 8	TRPM8	79054	-0.00438706
243591_at	0.00597894	-0.00249438	-0.00288124	-0.00219786	0.000873652	0.00100443	-0.000572094	0.00104146	0.00101152	-0.000999813	-0.000637592	-0.972343	1.20853	-1.35629	1.37625	0.556188	6.04632	54.2362	1.5312e-06	0.000104791	AI887749	---	---		0.00288124
243981_at	0.00327088	-0.00854888	-0.00319095	0.00126944	0.00164528	0.00115658	-0.00182897	0.000496143	-0.00040659	0.000253059	0.000643745	-0.596774	1.19787	-0.350446	1.43713	-0.526976	4.21681	52.4306	1.77736e-06	0.000111205	AI763206	serine/threonine kinase 4	STK4	6789	0.00319095
243985_at	0.00367431	-0.00817747	-0.00287517	-0.00102798	0.000662545	0.00166846	-0.00210573	0.000565551	-0.00153551	0.00025204	-0.00108396	-0.779355	1.78412	-0.553318	1.52389	-0.462403	5.16726	66.9266	6.04032e-07	6.65223e-05	BE219444	general transcription factor IIA, 2, 12kDa	GTF2A2	2958	0.00287517
244008_at	0.00390297	0.00644322	0.00526389	-0.00451293	-1.18119e-06	0.00075808	-0.000575588	0.00312168	0.00031295	8.38146e-05	0.000584574	-0.943676	-0.180513	-0.710225	-0.744333	1.97355	6.55147	64.5466	7.09343e-07	7.25258e-05	AW874263	poly (ADP-ribose) polymerase family, member 8	PARP8	79668	-0.00526389
244132_x_at	0.000686178	-0.0102317	0.00227263	0.000525573	-0.00225726	-1.72477e-05	-0.000451261	3.04045e-06	-0.00128931	-0.000795503	0.000845692	-0.929021	2.05509	0.905256	1.11652	-1.10386	5.74912	54.6306	1.48308e-06	0.000103974	AI267414	Zinc finger protein 518A	ZNF518A	9849	-0.00227263
244189_at	0.00623377	-0.00178529	-0.000288035	-0.00107573	0.00164957	-0.00016545	-0.00226885	0.000609355	-0.000632708	0.000300517	-0.000878694	-1.438	1.06027	-1.35878	1.5797	0.937295	6.8037	58.5948	1.08865e-06	8.88706e-05	AI888657	TTC28 antisense RNA (non-protein coding)	TTC28-AS	284900	0.000288035
244457_at	0.000795684	-0.00998266	-0.0017255	0.00384661	0.0015275	-0.000473245	0.00112398	0.000689809	0.000623261	0.00101328	-0.000465436	-0.721085	1.34099	0.572609	2.1862	-1.56512	6.38137	98.3114	1.084e-07	2.58519e-05	BF724206	---	---		0.0017255
244546_at	0.00587119	0.00153848	0.00319223	-0.00322692	0.0025907	0.000606151	0.000104319	0.00307249	-0.00114427	-0.000615309	-0.0001698	-1.75441	0.534737	-1.17337	0.7968	1.82721	5.25916	129.881	3.09301e-08	1.49485e-05	AI760495	cytochrome c, somatic	CYCS	54205	-0.00319223
244552_at	0.00269752	-0.00877762	-0.00408829	0.0015149	-0.00176414	0.00238033	-0.000908547	-1.58645e-05	-0.000866113	0.000969366	-4.06512e-05	-0.879194	2.82302	-0.59309	2.50291	-1.33503	5.42817	74.3904	3.77372e-07	5.4685e-05	AI190287	zinc finger family member 788	ZNF788	388507	0.00408829
244610_x_at	0.00134694	-0.00999855	-0.00132679	0.00197859	-0.0012335	0.00292313	-0.000630446	0.00115944	0.000865013	-0.000817173	0.000100511	-0.753669	2.11974	0.320764	1.65537	-1.27033	5.15428	96.9682	1.15306e-07	2.70267e-05	AA572726	---	---		0.00132679
244623_at	0.00323298	0.00798807	0.00374767	-0.00460551	0.00137877	-0.00065861	0.0003305	0.000105867	0.000451809	0.000150383	0.000625204	-0.71172	-1.0119	-1.12298	-1.12749	2.54933	5.3449	185.433	6.16752e-09	7.32233e-06	BF513800	potassium voltage-gated channel, KQT-like subfamily, member 5	KCNQ5	56479	-0.00374767
244633_at	0.00263135	-0.00881359	-0.00383701	-0.000143459	-0.00277499	0.00246518	-0.00123659	0.0014097	0.00132669	0.00140063	-0.000878275	-0.625832	2.29313	-0.435352	1.54702	-0.879657	5.90873	64.3439	7.19306e-07	7.25831e-05	AA404996	---	---		0.00383701
244726_at	-0.0021879	-0.00886385	-0.00152571	0.00574579	-0.0010183	0.000846338	0.00278244	0.0020126	0.000139312	0.000338614	0.00164552	0.00844721	0.551934	0.922794	0.922794	-1.42282	6.17097	52.2423	1.80571e-06	0.000112351	BF753047	---	---		0.00152571
35666_at	-0.00429739	-0.00684488	-0.00309872	0.00255026	-0.00325009	0.00192702	-0.000441087	0.00120608	0.00109739	-0.000770877	0.000442339	0.748542	1.00713	0.964155	0.195636	-1.85744	8.5197	64.3864	7.17206e-07	7.25831e-05	U38276	sema domain, immunoglobulin domain (Ig), short basic domain, secreted, (semaphorin) 3F	SEMA3F	6405	0.00309872
36554_at	0.00359808	-0.0062715	-0.00733223	-0.000723495	-0.000846317	0.00283727	-0.00157668	-0.000390751	0.000372031	0.000129406	0.000884148	-0.446312	2.47154	-1.69688	2.22088	-0.726867	7.75159	62.2524	8.32777e-07	7.81055e-05	Y15521	acetylserotonin O-methyltransferase-like	ASMTL	8623	0.00733223
37547_at	0.00274636	-0.00756932	-0.00164554	-0.00489985	-0.00549653	0.00454043	-0.00232616	0.00303162	2.0951e-05	0.000212079	-0.00119676	-0.88083	3.60882	-0.543691	0.898558	-0.558688	5.70986	73.3794	4.01097e-07	5.58321e-05	U85995	Bardet-Biedl syndrome 9	BBS9	27241	0.00164554
37566_at	0.00332053	0.00728404	0.00475347	-0.00359858	0.00289123	-0.00116399	0.000717521	0.00497821	0.000666595	-0.000600552	0.000621424	-1.00627	-1.31664	-0.85302	-0.810878	2.55441	5.17115	50.4374	2.10751e-06	0.000121283	AB028968	KIAA1045	KIAA1045	23349	-0.00475347
39248_at	-0.00567362	-0.0025805	-0.00412525	0.00045698	-0.00284675	0.00106311	0.000129115	-0.00420053	0.000988765	-0.000646032	-0.000708909	2.12889	0.432008	1.1017	-1.01152	-2.33301	7.68356	69.9824	4.95313e-07	6.01123e-05	N74607	aquaporin 3 (Gill blood group)	AQP3	360	0.00412525
44790_s_at	0.00292136	-0.00856863	-0.00401732	0.001318	0.00106066	0.00121381	-0.00264705	0.00205138	-0.00265925	0.000667277	-6.57459e-05	-0.718197	1.81428	-0.576788	2.06269	-0.877162	4.19946	80.9202	2.59255e-07	4.45241e-05	AI129310	chromosome 13 open reading frame 18	C13orf18	80183	0.00401732
