# Supplementary material for: Genome-Wide Profiling of Pluripotent Cells Reveals a Unique Molecular Signature of Human Embryonic Germ Cells
Source: PLoS One. 2012 Jun 21;7(6):e39088. doi: 10.1371/journal.pone.0039088 (PMC3380858; doi:10.1371/journal.pone.0039088)
Supplement: Table S5 — Complete list of differentially expressed genes in EGCs, ESCs, IPSCs, and ECCs compared to PGCs. (XLS) [file pone.0039088.s005.xls]

## Sheet: 1.UpPGCvsESC
Representative Public ID	Gene Title	Gene Symbol	Entrez Gene	ID	EGCvsREF	ESCvsREF	PGCvsREF	ECCvsREF	IPSCvsREF	AveExpr	F	P.Value	adj.P.Val
T50399	hemoglobin, alpha 1 /// hemoglobin, alpha 2	HBA1 /// HBA2		214414_x_at	-1.34679	-0.684915	7.62771	-2.16546	-2.0664	6.24497	456.006	1.01976e-10	1.94578e-06
U55764	sulfotransferase family 1E, estrogen-preferring, member 1	SULT1E1	6783	222940_at	-1.05115	-1.01709	5.02811	-1.27024	-1.11507	4.40813	303.127	6.58606e-10	3.59684e-06
V00489	hemoglobin, alpha 1 /// hemoglobin, alpha 2	HBA1 /// HBA2		217414_x_at	-0.803625	-1.02472	5.66016	-1.59391	-1.56563	7.29711	257.319	1.38994e-09	4.63466e-06
NM_004369	collagen, type VI, alpha 3	COL6A3	1293	201438_at	3.96864	0.550495	2.24741	-2.04126	-4.28957	9.08593	242.341	1.82645e-09	4.63466e-06
BF569051	H19, imprinted maternally expressed transcript (non-protein coding)	H19	283120	224646_x_at	3.83582	-3.19505	4.24916	-2.67812	-3.81817	9.03851	228.351	2.39416e-09	4.63466e-06
NM_002667	phospholamban	PLN	5350	204939_s_at	-0.845654	-0.907109	5.29029	-1.37363	-1.46309	5.81263	226.972	2.46105e-09	4.63466e-06
NM_002667	phospholamban	PLN	5350	204940_at	-0.779444	-0.893217	3.97364	-0.918782	-0.959389	4.20244	222.832	2.67605e-09	4.71442e-06
AL575306	H19, imprinted maternally expressed transcript (non-protein coding)	H19	283120	224997_x_at	3.95932	-2.46561	3.15622	-2.88762	-3.31652	7.61159	197.828	4.59722e-09	6.12362e-06
BC005931	hemoglobin, alpha 1 /// hemoglobin, alpha 2	HBA1 /// HBA2		211745_x_at	-0.636277	-1.45117	5.65158	-1.75317	-1.47894	7.17636	186.571	5.99858e-09	7.28002e-06
NM_000558	hemoglobin, alpha 1 /// hemoglobin, alpha 2	HBA1 /// HBA2		204018_x_at	-0.544432	-1.19089	4.95442	-1.54024	-1.33472	7.35638	176.09	7.79847e-09	8.20899e-06
AL037401	nuclear receptor subfamily 2, group F, member 2	NR2F2	7026	209120_at	1.96492	-3.86153	2.27332	-4.89234	1.06827	8.8379	173.262	8.39281e-09	8.20899e-06
AF105974	hemoglobin, alpha 1 /// hemoglobin, alpha 2	HBA1 /// HBA2		209458_x_at	-0.64426	-1.30337	5.61979	-1.64987	-1.5679	7.42222	173.15	8.41747e-09	8.20899e-06
D00943	myosin, heavy chain 6, cardiac muscle, alpha	MYH6	4624	214468_at	-1.38289	-1.25002	3.44539	1.62395	-1.57999	6.70787	169.706	9.22033e-09	8.3618e-06
AW025579	bicaudal C homolog 1 (Drosophila)	BICC1	80114	213429_at	1.31614	-2.90803	-0.915772	-2.53734	1.95528	7.16207	163.515	1.09122e-08	9.0991e-06
AF349114	hemoglobin, beta	HBB	3043	211696_x_at	-0.369083	-0.593281	3.07031	-1.03749	-0.788368	6.7846	139.966	2.20617e-08	1.29597e-05
AA788711	collagen, type I, alpha 2	COL1A2	1278	202403_s_at	2.53331	-0.329125	1.52473	-4.35204	-0.538718	11.2965	139.398	2.24713e-08	1.29597e-05
M25079	hemoglobin, beta	HBB	3043	209116_x_at	-0.439412	-1.17801	4.01856	-1.18419	-1.05749	5.97071	130.02	3.07817e-08	1.49485e-05
AB015228	aldehyde dehydrogenase 1 family, member A2	ALDH1A2	8854	207016_s_at	0.0217393	-1.21904	3.7306	-1.34005	-1.20909	6.31166	126.797	3.44744e-08	1.57084e-05
N90870	---	---		232113_at	2.40937	-2.2137	2.8862	-3.75536	-1.09203	7.7366	125.749	3.57912e-08	1.58916e-05
NM_016205	platelet derived growth factor C	PDGFC	56034	218718_at	0.0871613	-2.24862	-0.49537	-1.65643	2.09691	9.47638	120.611	4.32025e-08	1.73487e-05
NM_000851	glutathione S-transferase mu 5	GSTM5	2949	205752_s_at	0.69193	0.0516205	2.10021	-1.36651	-1.19827	6.81273	118.67	4.64809e-08	1.78765e-05
AI969945	Phospholamban	PLN	5350	228202_at	-0.646529	-0.932433	4.16719	-1.11519	-1.07732	4.30727	116.862	4.98112e-08	1.84097e-05
NM_000358	transforming growth factor, beta-induced, 68kDa	TGFBI	7045	201506_at	2.07186	-3.41799	0.147807	-2.96562	0.946012	10.9767	115.067	5.34089e-08	1.86967e-05
BG285011	AT rich interactive domain 5B (MRF1-like)	ARID5B	84159	212614_at	1.38232	-2.43122	-0.223564	-2.65693	1.34841	8.51733	113.466	5.68882e-08	1.90603e-05
NM_000559	hemoglobin, gamma A /// hemoglobin, gamma G	HBG1 /// HBG2		204848_x_at	-0.832387	-1.97677	5.89615	-1.69021	-1.31265	7.46197	113.141	5.76277e-08	1.91598e-05
NM_000633	B-cell CLL/lymphoma 2	BCL2	596	203685_at	-0.981839	-1.62887	2.93942	-1.07478	0.281708	5.92003	111.413	6.17639e-08	1.9836e-05
NM_000258	myosin, light chain 3, alkali; ventricular, skeletal, slow	MYL3	4634	205589_at	-0.00999055	-0.618211	3.28061	-1.12927	-1.21817	7.05514	110.176	6.49484e-08	2.02965e-05
NM_000184	hemoglobin, gamma A /// hemoglobin, gamma G	HBG1 /// HBG2		204419_x_at	-1.03662	-1.83904	6.3165	-1.62994	-1.47474	7.30417	109.009	6.81362e-08	2.0334e-05
NM_001423	epithelial membrane protein 1	EMP1	2012	201324_at	2.18038	-2.32751	0.193545	-4.2812	1.32056	8.41625	107.39	7.28831e-08	2.11721e-05
AW129056	hypothetical LOC57235	KIAA0485	57235	214295_at	-0.532676	-0.457154	2.39141	0.347217	-1.14069	4.76991	106.619	7.52838e-08	2.14139e-05
M14087	---	---		216405_at	3.16624	-5.06732	-0.671465	-5.80243	2.83879	10.3276	105.888	7.7649e-08	2.1478e-05
NM_016599	myozenin 2	MYOZ2	51778	207148_x_at	-0.240741	-0.733202	3.77057	-1.13746	-1.27026	4.98158	105.469	7.90459e-08	2.1478e-05
AF349571	hemoglobin, alpha 1 /// hemoglobin, alpha 2	HBA1 /// HBA2		211699_x_at	-0.501883	-1.23593	4.83279	-1.45784	-1.33611	7.39814	105.397	7.92908e-08	2.1478e-05
AI133353	hemoglobin, gamma A /// hemoglobin, gamma G	HBG1 /// HBG2		213515_x_at	-1.17183	-1.61096	7.76371	-2.2356	-1.97658	6.57007	102.954	8.81067e-08	2.30404e-05
AF020769	troponin C type 1 (slow)	TNNC1	7134	209904_at	-0.608703	-0.601388	2.66239	-0.195612	-0.835351	5.7477	102.158	9.12354e-08	2.31751e-05
NM_004503	homeobox C6	HOXC6	3223	206858_s_at	1.93843	-3.61367	1.24386	-4.66456	1.54659	8.5503	100.101	9.99662e-08	2.45372e-05
AI650353	dachshund homolog 1 (Drosophila)	DACH1	1602	228915_at	-1.23415	-1.89513	2.0491	-2.4422	2.12792	6.428	99.1025	1.04569e-07	2.52691e-05
BF342661	microtubule-associated protein 2	MAP2	4133	225540_at	-0.680975	-2.34956	0.872392	-2.16715	2.32733	7.23257	97.5123	1.12446e-07	2.64699e-05
AK000106	---	---		232541_at	0.372115	-0.434803	1.75881	0.931783	-2.02091	5.59966	96.1857	1.19577e-07	2.71697e-05
BF593263	Na+/K+ transporting ATPase interacting 4	NKAIN4	128414	228017_s_at	-0.596835	0.252368	2.64962	0.591491	-1.64803	6.19817	93.4492	1.36106e-07	2.90358e-05
NM_014624	S100 calcium binding protein A6	S100A6	6277	217728_at	2.38396	-2.14947	-0.524653	-4.77904	1.86832	10.2364	92.9459	1.39442e-07	2.95979e-05
BF939176	myozenin 2	MYOZ2	51778	213782_s_at	-0.223681	-1.02484	4.42604	-1.50834	-1.37984	5.09397	92.8672	1.39973e-07	2.95979e-05
NM_006741	protein phosphatase 1, regulatory (inhibitor) subunit 1A	PPP1R1A	5502	205478_at	-0.780466	-0.251697	0.955909	2.60304	-1.50827	5.97979	85.9638	1.97841e-07	3.72575e-05
AF147445	---	---		1556824_at	2.40401	-3.06718	-0.228404	-3.44994	1.07061	8.70946	82.0657	2.43471e-07	4.27416e-05
BF223193	X (inactive)-specific transcript (non-protein coding)	XIST	7503	224589_at	-0.280352	-0.538702	2.24186	-0.676804	-0.583454	3.86269	82.0124	2.4418e-07	4.27416e-05
AI628360	natriuretic peptide receptor C/guanylate cyclase C (atrionatriuretic peptide receptor C)	NPR3	4883	219789_at	2.23796	-0.932032	0.765248	-1.49467	-1.441	5.30186	81.3981	2.52523e-07	4.39204e-05
X79857	troponin T type 2 (cardiac)	TNNT2	7139	215389_s_at	-0.445333	-0.855166	3.5428	-0.309076	-1.42543	7.00816	79.441	2.81522e-07	4.7307e-05
NM_025057	chromosome 14 open reading frame 45	C14orf45	80127	220173_at	0.333578	-0.449707	1.83657	-1.45424	-0.438563	5.49481	79.3087	2.83625e-07	4.73539e-05
NM_000366	tropomyosin 1 (alpha)	TPM1	7168	206117_at	-1.6577	1.71243	2.98839	0.215689	-1.04916	8.44208	78.7846	2.92145e-07	4.76267e-05
AL534095	wntless homolog (Drosophila)	WLS	79971	228950_s_at	1.01679	-3.22861	-1.88936	-1.36822	2.23114	7.56559	78.5291	2.96412e-07	4.78934e-05
AA903473	integrin, alpha 8	ITGA8	8516	235666_at	2.05876	-1.39415	1.50672	-1.7902	-1.40506	6.05699	78.4766	2.97299e-07	4.78949e-05
AW007532	insulin-like growth factor binding protein 5	IGFBP5	3488	211959_at	3.33239	-3.64936	2.07397	-2.77318	-1.6498	9.40406	77.1249	3.21267e-07	4.97036e-05
AL046979	tensin 1	TNS1	7145	221748_s_at	2.00483	0.2147	2.60016	-1.2031	-3.00777	7.664	76.5239	3.32675e-07	5.04677e-05
AI694059	teashirt zinc finger homeobox 2	TSHZ2	128553	235616_at	1.39385	-1.1009	2.38208	-1.91978	-1.33509	5.8485	76.2085	3.3886e-07	5.09812e-05
BC009278	hypothetical protein LOC645722	LOC645722	645722	1555216_a_at	1.13504	-1.22568	1.95822	-1.43767	-1.07352	5.92128	75.8602	3.45855e-07	5.14664e-05
NM_000257	myosin, heavy chain 6, cardiac muscle, alpha /// myosin, heavy chain 7, cardiac muscle, beta	MYH6 /// MYH7		204737_s_at	-0.930717	-1.45664	4.52058	0.302122	-1.79887	5.98444	75.2176	3.59224e-07	5.28795e-05
BG290193	zinc finger protein 703	ZNF703	80139	222760_at	0.16561	-0.86336	2.34019	-0.269666	-1.25817	6.7371	74.4857	3.75225e-07	5.4685e-05
BE464483	lipase maturation factor 1	LMF1	64788	227984_at	0.191102	-1.07446	1.98131	0.0177856	-1.16568	5.13337	71.5571	4.48623e-07	5.76028e-05
AA029500	phospholipase D family, member 6	PLD6	201164	227037_at	-0.467502	-1.62833	-0.473228	-1.10039	2.05936	7.28823	70.7804	4.7095e-07	5.819e-05
BC002416	biglycan	BGN	633	201261_x_at	2.29536	-1.53138	1.68856	-1.88373	-1.65479	7.03863	70.1311	4.90658e-07	5.99078e-05
NM_000231	sarcoglycan, gamma (35kDa dystrophin-associated glycoprotein)	SGCG	6445	207302_at	-0.173283	-0.565969	2.54643	-0.505017	-0.999001	5.61107	69.1039	5.23935e-07	6.21426e-05
AI743156	kelch-like 31 (Drosophila)	KLHL31	401265	239398_at	-0.358463	-0.120635	2.89854	-0.914698	-0.923885	4.48506	69.1036	5.23945e-07	6.21426e-05
AI184988	fibrillin 3	FBN3	84467	240117_at	-0.521919	0.891106	1.89815	0.161723	-1.14837	6.83477	67.4996	5.81585e-07	6.53541e-05
R52023	---	---		235027_at	-0.902213	-1.7734	-0.304955	2.07363	0.31423	5.60903	66.8813	6.05852e-07	6.65742e-05
NM_020149	Meis homeobox 2	MEIS2	4212	207480_s_at	1.11664	-3.50354	0.424418	-2.30425	1.30443	9.37751	66.4009	6.25558e-07	6.79293e-05
NM_001771	CD22 molecule	CD22	933	204581_at	0.0736203	-0.45239	1.80597	-0.756295	-0.622604	5.30221	65.2201	6.77415e-07	7.10089e-05
BC004490	FBJ murine osteosarcoma viral oncogene homolog	FOS	2353	209189_at	0.67141	-1.15206	0.537505	2.35017	-2.2125	6.65375	65.0334	6.86088e-07	7.10993e-05
NM_003970	myomesin (M-protein) 2, 165kDa	MYOM2	9172	205826_at	-0.236349	-0.531355	2.17291	-0.945845	-0.404579	5.86538	64.4155	7.15767e-07	7.25831e-05
AA603041	hypothetical LOC150381	LOC150381	150381	238058_at	-0.901105	-1.65161	-0.213818	-2.20783	3.06607	6.43164	64.0652	7.33291e-07	7.29457e-05
AB051550	contactin associated protein-like 4	CNTNAP4	85445	232388_at	0.515793	-0.64841	1.96145	-1.63703	-0.515939	6.95583	63.897	7.41888e-07	7.36668e-05
AW135013	v-maf musculoaponeurotic fibrosarcoma oncogene homolog B (avian)	MAFB	9935	222670_s_at	0.719658	-1.04742	0.464306	1.13036	-1.43363	7.30495	63.5345	7.60841e-07	7.50359e-05
AF020768	myosin, light chain 2, regulatory, cardiac, slow	MYL2	4633	209742_s_at	-0.187827	-1.01098	3.41085	-1.0677	-1.03728	5.85769	62.7465	8.0411e-07	7.68634e-05
AL046017	family with sequence similarity 46, member C	FAM46C	54855	226811_at	-0.537855	-0.617994	0.784978	2.74351	-1.60847	6.11322	62.6129	8.11739e-07	7.70983e-05
NM_021951	doublesex and mab-3 related transcription factor 1	DMRT1	1761	220493_at	-0.210961	-0.93514	1.7649	0.373033	-0.902615	4.52632	61.7369	8.64021e-07	7.90398e-05
AL137578	EMX2 opposite strand (non-protein coding)	EMX2OS	196047	232531_at	0.464352	-1.27782	3.59385	-1.49473	-1.43783	6.03036	61.1183	9.03417e-07	8.13259e-05
BE644917	X (inactive)-specific transcript (non-protein coding)	XIST	7503	224590_at	-0.424187	-0.587075	2.66741	-0.757449	-0.65343	3.80717	60.3732	9.53818e-07	8.40175e-05
NM_003319	titin	TTN	7273	208195_at	-0.933515	0.560344	4.77542	-0.363244	-2.19472	7.22632	59.2751	1.03449e-06	8.63864e-05
AB051497	zinc finger protein 436	ZNF436	80818	226113_at	0.572143	-1.52617	1.41611	-2.61862	0.738253	7.14634	59.0534	1.05178e-06	8.74286e-05
AI830331	lysine (K)-specific demethylase 6B	KDM6B	23135	1556066_at	1.25102	-1.11085	0.357605	-0.960174	-0.479025	6.77069	58.7718	1.07424e-06	8.84875e-05
AW262311	---	---		231628_s_at	0.438944	-1.30602	1.78273	-4.86519	2.05136	8.50633	58.151	1.12585e-06	8.94789e-05
AI480314	SRY (sex determining region Y)-box 6	SOX6	55553	227498_at	-0.650435	-1.71884	1.20074	-2.01119	1.76368	5.82362	57.4327	1.18939e-06	9.31943e-05
NM_005330	hemoglobin, epsilon 1	HBE1	3046	205919_at	-0.779626	-0.30468	4.73398	-1.4781	-1.2894	6.04755	57.0284	1.22708e-06	9.51816e-05
D43968	runt-related transcription factor 1	RUNX1	861	209360_s_at	0.903659	-1.64937	0.234548	-1.8343	0.712632	7.47348	56.8809	1.24119e-06	9.54504e-05
BC033780	zinc binding alcohol dehydrogenase domain containing 2	ZADH2	284273	1554239_s_at	0.10281	-1.63396	-0.022391	-1.1495	1.22311	6.98854	56.6989	1.25888e-06	9.61552e-05
NM_014020	transmembrane protein 176B	TMEM176B	28959	220532_s_at	1.51675	-0.724854	0.527719	-1.09433	-0.897384	5.39315	56.65	1.26368e-06	9.63872e-05
BE567130	---	---		242873_at	-0.425193	-1.83063	-0.403671	-2.75575	3.14168	7.58194	56.0017	1.32952e-06	9.83864e-05
NM_004789	LIM homeobox 2	LHX2	9355	206140_at	-1.53098	-1.53016	2.14954	3.03594	-1.41596	5.73024	54.6651	1.47897e-06	0.000103819
BG326592	adenomatosis polyposis coli down-regulated 1-like	APCDD1L	164284	235548_at	0.77773	-0.919062	1.47819	-0.510706	-1.11636	6.36145	54.5393	1.49406e-06	0.000104475
NM_019102	homeobox A5	HOXA5	3202	213844_at	2.80861	-2.74334	1.9403	-2.97857	-1.20198	7.46888	54.5141	1.49711e-06	0.000104552
NM_013453	sperm protein associated with the nucleus, X-linked, family member A1 /// SPANX family, member A2 /// SPANX family, member B1 /// SPANX family, member B2 /// SPANX family, member C /// SPANX family, member F1	SPANXA1 /// SPANXA2 /// SPANXB1 /// SPANXB2 /// SPANXC /// SPANXF1		220922_s_at	-0.0267632	-0.264504	2.57261	-1.03424	-0.910647	5.9789	54.4452	1.50547e-06	0.000104594
AI535683	SWI/SNF related, matrix associated, actin dependent regulator of chromatin, subfamily a, member 2	SMARCA2	6595	217707_x_at	0.651137	-1.56447	0.773192	-2.59166	1.08266	8.54927	54.389	1.51234e-06	0.000104594
AF020589	cytochrome c oxidase subunit VIa polypeptide 1	COX6A1	1337	224344_at	3.09044	-4.44801	-0.814105	-4.60786	2.00687	9.2672	54.0882	1.54975e-06	0.000105139
AF245505	matrix-remodelling associated 5	MXRA5	25878	209596_at	1.8972	-0.769583	1.88321	-0.365515	-2.65247	7.65547	54.0053	1.56026e-06	0.000105478
BC029332	---	---		1570107_at	3.36917	-3.51921	-0.622126	-3.4118	0.493181	8.26671	54.003	1.56055e-06	0.000105478
AI983428	collagen, type V, alpha 1	COL5A1	1289	212489_at	2.18188	-0.128752	1.68373	-1.08217	-2.54	6.96809	53.1735	1.67065e-06	0.000109399
NM_001824	creatine kinase, muscle	CKM	1158	204810_s_at	-0.375575	-0.669172	3.52719	-1.06137	-1.04525	5.35578	51.6802	1.89371e-06	0.000116222
AI524125	protocadherin 9	PCDH9	5101	219737_s_at	0.142857	-1.24669	2.14819	-2.32172	0.388394	6.78093	51.5961	1.90732e-06	0.000116723
NM_016940	RWD domain containing 2B	RWDD2B	10069	218377_s_at	0.20602	-2.04284	-0.185399	-0.63606	1.02257	7.44637	51.2998	1.95621e-06	0.000117919
NM_153224	hypothetical protein MGC34034	MGC34034	154089	1552899_at	-0.30009	-0.216545	1.88114	-0.45809	-0.57643	4.15315	50.9125	2.02247e-06	0.000119247
BE966018	ring finger protein, LIM domain interacting	RLIM	51132	222815_at	-0.807	-2.36299	-0.880904	1.71212	1.04052	5.97092	50.8798	2.02818e-06	0.000119359
AA922068	cyclin-dependent kinase 6	CDK6	1021	224848_at	-1.0087	-1.36987	-0.369302	-0.650842	2.14542	8.2253	50.7662	2.0482e-06	0.000119891
AF026219	deleted in liver cancer 1	DLC1	10395	210762_s_at	1.66663	-0.736293	1.41911	-0.199792	-2.23408	7.56764	50.4783	2.10001e-06	0.000121064
AI417917	EH-domain containing 2	EHD2	30846	221870_at	1.11232	-0.0185085	1.0379	-0.728463	-1.31244	7.77356	50.1389	2.16317e-06	0.000122867
AF098306	sperm protein associated with the nucleus, X-linked, family member A1 /// SPANX family, member A2 /// SPANX family, member C	SPANXA1 /// SPANXA2 /// SPANXC		224032_x_at	0.0830592	-0.36761	1.55437	-0.519012	-0.650762	5.28716	49.2994	2.32958e-06	0.000127353
NM_024563	chromosome 5 open reading frame 23	C5orf23	79614	219054_at	2.85949	-1.16739	0.394172	-1.89289	-1.47121	6.74429	49.2595	2.33788e-06	0.000127626

## Sheet: 2.UpESCvsPGC
Representative Public ID	Gene Title	Gene Symbol	Entrez Gene	ID	EGCvsREF	ESCvsREF	PGCvsREF	ECCvsREF	IPSCvsREF	AveExpr	F	P.Value	adj.P.Val	Representative Public ID	Gene Title	Gene Symbol	Entrez Gene
NM_018189	developmental pluripotency associated 4	DPPA4	55211	219651_at	-2.05273	5.06969	-0.0214575	4.58596	-2.68016	6.2434	504.204	6.43991e-11	1.94578e-06	NM_018189	developmental pluripotency associated 4	DPPA4	55211
BF672169	hypothetical LOC100131138	LOC100131138	100131138	230195_at	-1.43221	2.82116	-1.41399	4.55381	-1.60139	5.53951	417.962	1.51878e-10	1.98931e-06	BF672169	hypothetical LOC100131138	LOC100131138	100131138
BE779765	orthodenticle homeobox 2	OTX2	5015	242128_at	-1.51247	3.36552	-1.2247	4.5424	-1.82117	5.04517	401.679	1.82128e-10	1.98931e-06	BE779765	orthodenticle homeobox 2	OTX2	5015
AI435590	---	---		237193_s_at	-1.37057	3.67197	-1.13327	3.66747	-1.54289	5.57859	377.653	2.41421e-10	2.07018e-06	AI435590	---	---
AW014743	---	---		230356_at	-1.15235	1.92379	-1.28929	4.62761	-1.71447	5.24738	360.481	2.98605e-10	2.07018e-06	AW014743	---	---
AW026426	SOX2 overlapping transcript (non-protein coding)	SOX2OT	347689	231898_x_at	-2.36629	-1.28375	-2.53625	-0.711664	4.95949	5.59419	351.402	3.355e-10	2.07018e-06	AW026426	SOX2 overlapping transcript (non-protein coding)	SOX2OT	347689
NM_000702	ATPase, Na+/K+ transporting, alpha 2 polypeptide	ATP1A2	477	203296_s_at	-1.84658	2.27442	0.554424	3.96274	-1.92301	5.58404	350.118	3.41158e-10	2.07018e-06	NM_000702	ATPase, Na+/K+ transporting, alpha 2 polypeptide	ATP1A2	477
NM_020634	growth differentiation factor 3	GDF3	9573	220053_at	-1.10547	0.751603	-1.12463	4.73137	-1.54956	7.15854	292.519	7.74802e-10	3.84675e-06	NM_020634	growth differentiation factor 3	GDF3	9573
NM_024865	Nanog homeobox	NANOG	79923	220184_at	-2.11592	4.67599	0.939593	5.05746	-3.44078	7.40366	267.546	1.16378e-09	4.63466e-06	NM_024865	Nanog homeobox	NANOG	79923
NM_004734	doublecortin-like kinase 1	DCLK1	9201	205399_at	-1.8683	4.30257	-0.629655	4.61653	-2.2238	7.13008	266.72	1.1803e-09	4.63466e-06	NM_004734	doublecortin-like kinase 1	DCLK1	9201
BE348466	RNA binding protein with multiple splicing 2	RBPMS2	348093	228802_at	-1.02983	3.76892	-0.0948243	3.24749	-2.32826	8.15226	257.845	1.37707e-09	4.63466e-06	BE348466	RNA binding protein with multiple splicing 2	RBPMS2	348093
AF268613	POU class 5 homeobox 1 pseudogene 4	POU5F1P4	645682	210905_x_at	-1.4837	2.59222	-1.30354	3.89777	-1.10987	7.42008	250.768	1.56317e-09	4.63466e-06	AF268613	POU class 5 homeobox 1 pseudogene 4	POU5F1P4	645682
AW118997	---	---		240681_at	-1.3472	3.6381	-0.286526	3.31915	-1.88725	5.48589	245.006	1.73774e-09	4.63466e-06	AW118997	---	---
BC007230	coagulation factor C homolog, cochlin (Limulus polyphemus)	COCH	1690	1554242_a_at	-2.23887	-0.487709	-1.90268	0.947436	3.03827	6.35747	241.271	1.86365e-09	4.63466e-06	BC007230	coagulation factor C homolog, cochlin (Limulus polyphemus)	COCH	1690
BC001186	protocadherin beta 5	PCDHB5	26167	223629_at	-1.18398	3.03635	-0.0100213	2.86398	-1.73077	5.68633	238.235	1.97422e-09	4.63466e-06	BC001186	protocadherin beta 5	PCDHB5	26167
AI191897	ChaC, cation transport regulator homolog 2 (E. coli)	CHAC2	494143	235117_at	-2.66071	0.27084	-2.31826	0.826078	3.56522	7.10625	236.183	2.05351e-09	4.63466e-06	AI191897	ChaC, cation transport regulator homolog 2 (E. coli)	CHAC2	494143
NM_002607	platelet-derived growth factor alpha polypeptide	PDGFA	5154	205463_s_at	-1.04143	2.49087	-0.150065	4.10191	-2.42343	6.43454	235.347	2.08695e-09	4.63466e-06	NM_002607	platelet-derived growth factor alpha polypeptide	PDGFA	5154
BC002665	proteolipid protein 1	PLP1	5354	210198_s_at	-3.13425	2.26435	-1.56075	1.93455	2.13026	7.21752	234.61	2.11695e-09	4.63466e-06	BC002665	proteolipid protein 1	PLP1	5354
NM_006444	structural maintenance of chromosomes 2	SMC2	10592	204240_s_at	-1.76274	0.986333	-2.11558	1.09521	2.11421	7.19062	233.61	2.15848e-09	4.63466e-06	NM_006444	structural maintenance of chromosomes 2	SMC2	10592
AL136825	ubiquitin specific peptidase 44	USP44	84101	224048_at	-2.60233	2.92959	-2.51644	2.8764	1.38582	6.81868	229.027	2.36218e-09	4.63466e-06	AL136825	ubiquitin specific peptidase 44	USP44	84101
BE502537	gamma-aminobutyric acid (GABA) A receptor, beta 3	GABRB3	2562	227690_at	-1.28933	3.51304	-0.89368	3.46614	-1.59666	5.12552	223.748	2.62657e-09	4.71442e-06	BE502537	gamma-aminobutyric acid (GABA) A receptor, beta 3	GABRB3	2562
AL522781	insulin-like growth factor binding protein-like 1	IGFBPL1	347252	227760_at	-1.34982	3.967	-0.63034	3.18921	-1.67843	6.21898	219.66	2.85644e-09	4.87496e-06	AL522781	insulin-like growth factor binding protein-like 1	IGFBPL1	347252
BC043407	hypothetical LOC285401	LOC285401	285401	1557369_a_at	-1.16069	4.10719	-0.921141	3.04591	-1.62488	6.26326	215.669	3.10482e-09	5.13828e-06	BC043407	hypothetical LOC285401	LOC285401	285401
AI669815	SRY (sex determining region Y)-box 2	SOX2	6657	228038_at	-3.39814	3.77653	-1.86066	3.99344	0.717442	7.79467	210.344	3.47863e-09	5.557e-06	AI669815	SRY (sex determining region Y)-box 2	SOX2	6657
AF136970	pipecolic acid oxidase	PIPOX	51268	221605_s_at	-1.15726	2.36344	-0.934899	4.04506	-1.704	6.56827	209.26	3.56133e-09	5.557e-06	AF136970	pipecolic acid oxidase	PIPOX	51268
AI435590	---	---		237192_at	-1.01916	3.63153	-1.08443	2.89705	-1.39976	4.81226	203.276	4.06334e-09	5.93951e-06	AI435590	---	---
NM_003413	Zic family member 3 (odd-paired homolog, Drosophila)	ZIC3	7547	207197_at	-1.3106	4.08181	-1.25328	3.73026	-1.70133	5.29802	202.81	4.10599e-09	5.93951e-06	NM_003413	Zic family member 3 (odd-paired homolog, Drosophila)	ZIC3	7547
AA758105	hypothetical protein LOC100292909	LOC100292909	100292909	241535_at	-2.38866	3.14625	-0.918619	3.75566	-0.551449	6.93145	201.431	4.23525e-09	5.93951e-06	AA758105	hypothetical protein LOC100292909	LOC100292909	100292909
BC041481	chromosome 17 open reading frame 104	C17orf104	284071	1562484_at	-1.13092	1.52762	-1.11046	3.86436	-1.21422	4.60408	201.366	4.2415e-09	5.93951e-06	BC041481	chromosome 17 open reading frame 104	C17orf104	284071
AI203404	LINE-1 type transposase domain containing 1	L1TD1	54596	236894_at	-1.34133	3.79511	-0.424899	2.63922	-1.39992	6.88593	197.978	4.58142e-09	6.12362e-06	AI203404	LINE-1 type transposase domain containing 1	L1TD1	54596
AW438674	melanoma antigen family A, 4	MAGEA4	4103	214254_at	-0.530457	5.60099	0.127414	-0.901331	-0.820593	4.44788	191.321	5.35152e-09	6.79681e-06	AW438674	melanoma antigen family A, 4	MAGEA4	4103
BE138486	---	---		231470_at	-1.03859	2.1268	-0.940178	3.30814	-1.24898	4.86708	189.721	5.55957e-09	6.90056e-06	BE138486	---	---
NM_013243	secretogranin III	SCG3	29106	219196_at	-1.01706	2.67276	-0.872042	2.82549	-1.17617	4.32372	184.231	6.35233e-09	7.38128e-06	NM_013243	secretogranin III	SCG3	29106
AI740721	immunoglobulin superfamily, DCC subclass, member 3	IGDCC3	9543	230960_at	-0.905069	1.66847	-0.371678	3.10717	-1.47475	5.75232	182.969	6.5537e-09	7.4566e-06	AI740721	immunoglobulin superfamily, DCC subclass, member 3	IGDCC3	9543
N32798	zinc finger protein 42 homolog (mouse)	ZFP42	132625	243161_x_at	-0.817953	5.43699	0.899119	-0.776172	-1.07634	4.7583	177.308	7.55836e-09	8.20899e-06	N32798	zinc finger protein 42 homolog (mouse)	ZFP42	132625
BC002712	v-myc myelocytomatosis viral related oncogene, neuroblastoma derived (avian)	MYCN	4613	209757_s_at	-1.11965	3.39407	0.325505	3.57754	-2.61374	7.2612	174.579	8.10937e-09	8.20899e-06	BC002712	v-myc myelocytomatosis viral related oncogene, neuroblastoma derived (avian)	MYCN	4613
NM_006681	neuromedin U	NMU	10874	206023_at	-1.69528	2.7517	1.05835	2.41953	-1.54053	7.03011	173.524	8.33547e-09	8.20899e-06	NM_006681	neuromedin U	NMU	10874
AA215381	---	---		243154_at	-0.375623	0.619438	-0.971749	2.94599	-1.14702	6.08398	171.428	8.80777e-09	8.27475e-06	AA215381	---	---
NM_002701	POU class 5 homeobox 1 /// POU class 5 homeobox 1B /// POU class 5 homeobox 1 pseudogene 3 /// POU class 5 homeobox 1 pseudogene 4	POU5F1 /// POU5F1B /// POU5F1P3 /// POU5F1P4		208286_x_at	-0.799148	1.9845	-0.790662	3.05317	-1.37069	8.70756	170.868	8.93945e-09	8.27475e-06	NM_002701	POU class 5 homeobox 1 /// POU class 5 homeobox 1B /// POU class 5 homeobox 1 pseudogene 3 /// POU class 5 homeobox 1 pseudogene 4	POU5F1 /// POU5F1B /// POU5F1P3 /// POU5F1P4
BE783065	small nuclear ribonucleoprotein polypeptide N	SNRPN	6638	226587_at	-2.2129	4.13173	-0.169509	2.50098	-0.718659	8.371	169.225	9.33971e-09	8.3618e-06	BE783065	small nuclear ribonucleoprotein polypeptide N	SNRPN	6638
NM_014278	heat shock 70kDa protein 4-like	HSPA4L	22824	205543_at	-1.73231	-0.570325	-1.75075	-0.0174105	3.10119	6.25868	167.951	9.66524e-09	8.51367e-06	NM_014278	heat shock 70kDa protein 4-like	HSPA4L	22824
BC002477	dehydrogenase E1 and transketolase domain containing 1	DHTKD1	55526	209916_at	-1.88191	0.911821	-1.04766	1.89196	1.0151	7.69079	165.524	1.03247e-08	8.95019e-06	BC002477	dehydrogenase E1 and transketolase domain containing 1	DHTKD1	55526
NM_133329	potassium voltage-gated channel, subfamily G, member 3	KCNG3	170850	1552897_a_at	-0.873904	2.27134	-1.01602	3.1204	-1.28613	5.03191	163.635	1.08759e-08	9.0991e-06	NM_133329	potassium voltage-gated channel, subfamily G, member 3	KCNG3	170850
D82346	potassium voltage-gated channel, KQT-like subfamily, member 2	KCNQ2	3785	210508_s_at	-0.723833	2.17048	-0.820132	2.75247	-1.28788	6.26364	163.238	1.09963e-08	9.0991e-06	D82346	potassium voltage-gated channel, KQT-like subfamily, member 2	KCNQ2	3785
NM_173648	coiled-coil domain containing 141	CCDC141	285025	1553645_at	-0.845548	1.65105	-0.60674	2.62881	-1.05285	4.63867	162.415	1.12513e-08	9.17116e-06	NM_173648	coiled-coil domain containing 141	CCDC141	285025
AF229180	aminoadipate-semialdehyde synthase	AASS	10157	210852_s_at	-2.23131	4.36351	-0.819914	0.691426	0.862465	7.22191	160.592	1.18416e-08	9.30287e-06	AF229180	aminoadipate-semialdehyde synthase	AASS	10157
AK091930	Hypothetical protein LOC100288099	LOC100288099	100288099	1556469_s_at	-0.996161	3.57607	-0.999502	2.17088	-0.976778	5.07035	159.771	1.21199e-08	9.30287e-06	AK091930	Hypothetical protein LOC100288099	LOC100288099	100288099
BF057731	major histocompatibility complex, class II, DP beta 2 (pseudogene)	HLA-DPB2	3116	239975_at	-1.18095	4.52407	-1.03807	2.70245	-1.43666	5.07907	157.201	1.30438e-08	9.75837e-06	BF057731	major histocompatibility complex, class II, DP beta 2 (pseudogene)	HLA-DPB2	3116
Z98443	WD repeat domain 72	WDR72	256764	227174_at	-1.63437	2.78521	0.0229866	4.14228	-2.07088	5.92081	153.912	1.43546e-08	1.0394e-05	Z98443	WD repeat domain 72	WDR72	256764
AI686283	---	---		240267_at	-0.730532	2.46039	-1.00822	2.17232	-0.865664	5.66184	153.653	1.44643e-08	1.0394e-05	AI686283	---	---
W23691	---	---		243416_at	-1.36369	1.65576	-0.547346	2.80246	-0.691644	6.4414	149.671	1.629e-08	1.12614e-05	W23691	---	---
AI962352	---	---		231690_at	-0.839338	1.62983	-0.739261	2.73209	-1.03249	4.78459	147.464	1.74233e-08	1.18943e-05	AI962352	---	---
AW183154	kinesin family member 14	KIF14	9928	236641_at	-2.48084	1.92812	-2.21639	3.08335	1.26017	6.64066	146.576	1.7906e-08	1.19256e-05	AW183154	kinesin family member 14	KIF14	9928
AI827820	methyl-CpG binding domain protein 2	MBD2	8932	214396_s_at	-1.24959	2.94157	-0.949106	3.16328	-1.20705	5.25887	145.962	1.82491e-08	1.20077e-05	AI827820	methyl-CpG binding domain protein 2	MBD2	8932
AL365406	zinc finger RNA binding protein 2	ZFR2	23217	233064_at	-0.903972	1.52361	0.211127	2.61409	-1.48738	6.09798	145.248	1.86586e-08	1.2131e-05	AL365406	zinc finger RNA binding protein 2	ZFR2	23217
AI554106	polyhomeotic homolog 1 (Drosophila)	PHC1	1911	225958_at	-1.73443	2.60446	-1.15612	3.73631	-0.853839	8.78359	142.731	2.0194e-08	1.2812e-05	AI554106	polyhomeotic homolog 1 (Drosophila)	PHC1	1911
L07335	SRY (sex determining region Y)-box 2	SOX2	6657	213721_at	-1.52183	2.10619	-1.34669	3.0665	-0.326777	7.03161	142.02	2.06551e-08	1.2812e-05	L07335	SRY (sex determining region Y)-box 2	SOX2	6657
AB020690	paraneoplastic antigen MA2	PNMA2	10687	209598_at	-1.02774	0.599536	-1.18712	4.72813	-1.53278	6.06214	141.682	2.08791e-08	1.2812e-05	AB020690	paraneoplastic antigen MA2	PNMA2	10687
AK022821	developmental pluripotency associated 4	DPPA4	55211	232985_s_at	-1.58463	4.4229	-0.741356	4.84764	-2.62719	6.9521	140.447	2.17224e-08	1.29597e-05	AK022821	developmental pluripotency associated 4	DPPA4	55211
AB007875	KIAA0415	KIAA0415	9907	209913_x_at	-1.25256	2.21026	-0.604776	2.43733	-0.705896	6.0312	138.658	2.30181e-08	1.29597e-05	AB007875	KIAA0415	KIAA0415	9907
NM_005044	protein kinase, X-linked	PRKX	5613	204061_at	-1.63256	1.00242	-1.74861	1.83255	1.24246	6.68158	136.111	2.50305e-08	1.36333e-05	NM_005044	protein kinase, X-linked	PRKX	5613
NM_152573	RAS and EF-hand domain containing	RASEF	158158	1553185_at	-1.42592	2.67325	0.576053	2.0931	-1.24459	9.13909	135.29	2.57246e-08	1.37735e-05	NM_152573	RAS and EF-hand domain containing	RASEF	158158
NM_001008	ribosomal protein S4, Y-linked 1	RPS4Y1	6192	201909_at	1.51257	1.70994	-1.07068	-5.83475	2.52106	10.5364	134.467	2.64431e-08	1.38829e-05	NM_001008	ribosomal protein S4, Y-linked 1	RPS4Y1	6192
AJ271379	spindlin family, member 3	SPIN3	169981	1555882_at	-1.00671	0.0314629	-1.95974	1.4408	1.34218	5.73594	134.41	2.6494e-08	1.38829e-05	AJ271379	spindlin family, member 3	SPIN3	169981
AW592266	v-myb myeloblastosis viral oncogene homolog (avian)-like 1	MYBL1	4603	213906_at	-2.12908	1.3896	-1.75173	1.84756	1.60199	5.64778	133.949	2.69084e-08	1.38829e-05	AW592266	v-myb myeloblastosis viral oncogene homolog (avian)-like 1	MYBL1	4603
NM_004426	polyhomeotic homolog 1 (Drosophila)	PHC1	1911	218338_at	-1.32123	2.27873	-0.900373	3.28632	-1.02898	9.49748	133.36	2.74497e-08	1.40104e-05	NM_004426	polyhomeotic homolog 1 (Drosophila)	PHC1	1911
AU151635	---	---		232111_at	-1.33609	3.15111	-0.473214	3.23163	-1.55322	6.452	132.985	2.78011e-08	1.40583e-05	AU151635	---	---
AI693153	gamma-aminobutyric acid (GABA) A receptor, beta 3	GABRB3	2562	229724_at	-1.12868	4.45728	-0.0666263	2.12958	-1.73238	5.46131	130.468	3.03067e-08	1.49485e-05	AI693153	gamma-aminobutyric acid (GABA) A receptor, beta 3	GABRB3	2562
R38389	olfactomedin 1	OLFM1	10439	213131_at	-0.797445	2.86596	-0.846669	3.26976	-1.77327	6.30668	130.249	3.05381e-08	1.49485e-05	R38389	olfactomedin 1	OLFM1	10439
AI760495	cytochrome c, somatic	CYCS	54205	244546_at	-1.75441	0.534737	-1.17337	0.7968	1.82721	5.25916	129.881	3.09301e-08	1.49485e-05	AI760495	cytochrome c, somatic	CYCS	54205
NM_173553	tripartite motif family-like 2	TRIML2	205860	1552580_at	-0.718314	1.53952	-0.91897	2.7125	-0.990548	5.54907	128.305	3.26836e-08	1.55213e-05	NM_173553	tripartite motif family-like 2	TRIML2	205860
NM_017489	telomeric repeat binding factor (NIMA-interacting) 1	TERF1	7013	203449_s_at	-1.75175	3.57512	-0.644977	1.53614	-0.0340625	9.0695	127.527	3.35926e-08	1.57084e-05	NM_017489	telomeric repeat binding factor (NIMA-interacting) 1	TERF1	7013
AB002438	sema domain, transmembrane domain (TM), and cytoplasmic domain, (semaphorin) 6A	SEMA6A	57556	215028_at	-2.00825	3.56135	-0.868491	3.35716	-0.837976	6.51481	127.048	3.4169e-08	1.57084e-05	AB002438	sema domain, transmembrane domain (TM), and cytoplasmic domain, (semaphorin) 6A	SEMA6A	57556
BG054792	---	---		237778_at	-0.831918	2.77312	-0.839358	2.30647	-1.07053	5.14768	126.807	3.44625e-08	1.57084e-05	BG054792	---	---
NM_021127	phorbol-12-myristate-13-acetate-induced protein 1	PMAIP1	5366	204286_s_at	-1.47275	2.26296	-2.40541	3.40916	0.0492612	7.4397	126.764	3.45157e-08	1.57084e-05	NM_021127	phorbol-12-myristate-13-acetate-induced protein 1	PMAIP1	5366
AK001570	filamin A interacting protein 1	FILIP1	27145	231945_at	-0.789394	1.32487	-0.321565	2.76887	-1.28377	5.40405	125.837	3.56776e-08	1.58916e-05	AK001570	filamin A interacting protein 1	FILIP1	27145
H06509	WNK lysine deficient protein kinase 3	WNK3	65267	232282_at	-0.965283	0.730246	-1.06883	3.09794	-0.630875	5.72992	124.77	3.7076e-08	1.62114e-05	H06509	WNK lysine deficient protein kinase 3	WNK3	65267
W46994	---	---		229417_at	-1.83021	-0.289339	-1.43929	1.51197	1.8782	6.2518	124.185	3.78697e-08	1.64141e-05	W46994	---	---
BG165011	proline rich 11	PRR11	55771	228273_at	-2.26175	1.87297	-1.64879	1.82874	1.51745	9.39177	123.609	3.86733e-08	1.65195e-05	BG165011	proline rich 11	PRR11	55771
AW016812	---	---		231644_at	-1.4415	3.75791	-0.795844	3.68202	-1.73526	5.36526	123.577	3.87178e-08	1.65195e-05	AW016812	---	---
BC013077	---	---		1558522_at	-1.52889	0.484233	-1.83122	1.18588	1.79771	5.43084	122.527	4.0238e-08	1.69126e-05	BC013077	---	---
NM_018685	anillin, actin binding protein	ANLN	54443	1552619_a_at	-1.96417	0.701543	-2.39716	3.18547	1.20478	6.80857	122.029	4.09839e-08	1.69565e-05	NM_018685	anillin, actin binding protein	ANLN	54443
BE220330	chromosome 7 open reading frame 46	C7orf46	340277	228600_x_at	-0.836508	1.54396	-0.304056	-2.4474	2.15616	5.8362	121.241	4.21991e-08	1.7328e-05	BE220330	chromosome 7 open reading frame 46	C7orf46	340277
AI478781	gamma-aminobutyric acid (GABA) A receptor, beta 3	GABRB3	2562	227830_at	-1.00307	4.0895	-0.686544	2.83676	-1.79358	6.36519	120.844	4.28279e-08	1.73487e-05	AI478781	gamma-aminobutyric acid (GABA) A receptor, beta 3	GABRB3	2562
AW007080	interleukin 17 receptor D	IL17RD	54756	227997_at	-1.30774	1.96887	0.953782	2.97426	-1.96725	8.4603	119.221	4.55195e-08	1.77203e-05	AW007080	interleukin 17 receptor D	IL17RD	54756
AL080135	testis-specific transcript, Y-linked 15 (non-protein coding)	TTTY15	64595	214983_at	-0.894947	0.636095	-1.78011	0.977	1.21832	6.06552	119.099	4.57303e-08	1.77203e-05	AL080135	testis-specific transcript, Y-linked 15 (non-protein coding)	TTTY15	64595
AJ278112	DEP domain containing 1	DEPDC1	55635	232278_s_at	-1.86346	-0.190829	-2.23358	2.60161	1.68172	6.20178	118.443	4.68833e-08	1.79052e-05	AJ278112	DEP domain containing 1	DEPDC1	55635
AI803485	URB1 ribosome biogenesis 1 homolog (S. cerevisiae)	URB1	9875	212996_s_at	-1.68661	0.822847	-0.644483	0.925008	1.22531	6.80531	118.085	4.75279e-08	1.80253e-05	AI803485	URB1 ribosome biogenesis 1 homolog (S. cerevisiae)	URB1	9875
BF671894	required for meiotic nuclear division 5 homolog A (S. cerevisiae)	RMND5A	64795	212482_at	-1.36022	0.301102	-1.28185	1.04936	1.41484	8.64212	116.923	4.96938e-08	1.84097e-05	BF671894	required for meiotic nuclear division 5 homolog A (S. cerevisiae)	RMND5A	64795
BF510309	---	---		240186_at	-0.549838	4.22264	0.080492	-0.444105	-0.615301	4.17545	116.821	4.98899e-08	1.84097e-05	BF510309	---	---
BG179854	myelin expression factor 2	MYEF2	50804	222772_at	-1.86103	0.352508	-1.35409	1.7733	1.46406	6.45143	116.467	5.05771e-08	1.84718e-05	BG179854	myelin expression factor 2	MYEF2	50804
AL109688	---	---		1562169_at	-0.863286	1.26501	-0.676051	2.60836	-0.846588	4.53156	116.387	5.07345e-08	1.84718e-05	AL109688	---	---
BF510715	fibroblast growth factor 4	FGF4	2249	206783_at	-0.700092	1.92472	-0.46154	2.74459	-1.46351	6.71771	115.069	5.34049e-08	1.86967e-05	BF510715	fibroblast growth factor 4	FGF4	2249
AI768144	---	---		237383_at	-0.721226	2.99862	-0.468091	2.01653	-1.31061	5.65663	115.05	5.34444e-08	1.86967e-05	AI768144	---	---
CA503291	UDP-GlcNAc:betaGal beta-1,3-N-acetylglucosaminyltransferase 7	B3GNT7	93010	1555963_x_at	-0.427256	1.4324	-0.453621	2.17787	-1.19971	5.4986	115.034	5.34779e-08	1.86967e-05	CA503291	UDP-GlcNAc:betaGal beta-1,3-N-acetylglucosaminyltransferase 7	B3GNT7	93010
AI800470	---	---		242836_at	-0.906036	0.825689	-0.766306	2.75831	-0.697196	4.59261	114.55	5.45032e-08	1.87818e-05	AI800470	---	---
AL834519	---	---		1562289_at	-0.636187	2.68856	-0.486619	1.48307	-0.924299	6.28032	114.467	5.46814e-08	1.87818e-05	AL834519	---	---
NM_018936	protocadherin beta 2	PCDHB2	56133	231725_at	-0.465209	2.34407	-0.439843	2.1492	-1.45572	5.23899	114.281	5.50854e-08	1.88024e-05	NM_018936	protocadherin beta 2	PCDHB2	56133
AV723914	family with sequence similarity 19 (chemokine (C-C motif)-like), member A5	FAM19A5	25817	229459_at	-0.722221	1.17776	-0.32946	2.88737	-1.37564	4.64615	114.075	5.55345e-08	1.88379e-05	AV723914	family with sequence similarity 19 (chemokine (C-C motif)-like), member A5	FAM19A5	25817
BC036488	---	---		1554007_at	-1.96849	3.23226	-1.479	3.55531	-0.493132	9.13634	113.899	5.59223e-08	1.88524e-05	BC036488	---	---
AW136397	Proteasome (prosome, macropain) assembly chaperone 4	PSMG4	389362	242055_at	-0.50519	2.0782	-0.952717	1.78565	-0.742829	4.79547	112.877	5.82375e-08	1.91598e-05	AW136397	Proteasome (prosome, macropain) assembly chaperone 4	PSMG4	389362
BE502594	abhydrolase domain containing 12B	ABHD12B	145447	237974_at	-0.709408	0.966269	-0.710584	2.63546	-0.895936	4.23448	112.008	6.03014e-08	1.96018e-05	BE502594	abhydrolase domain containing 12B	ABHD12B	145447
AV720650	family with sequence similarity 169, member A	FAM169A	26049	235048_at	-2.66438	2.2212	-0.693948	2.35178	0.81876	7.87817	111.861	6.06578e-08	1.96018e-05	AV720650	family with sequence similarity 169, member A	FAM169A	26049
NM_017784	oxysterol binding protein-like 10	OSBPL10	114884	219073_s_at	0.271813	2.34584	-1.53573	1.64244	-1.1249	7.61674	110.132	6.50662e-08	2.02965e-05	NM_017784	oxysterol binding protein-like 10	OSBPL10	114884
U00954	UDP-glucose pyrophosphorylase 2	UGP2	7360	232180_at	-0.980023	4.55037	0.119065	1.62774	-1.70131	6.40437	109.865	6.57807e-08	2.02965e-05	U00954	UDP-glucose pyrophosphorylase 2	UGP2	7360
BC013944	chromosome 13 open reading frame 38	C13orf38	728591	1570153_at	-0.852877	2.84474	-1.20232	-1.45701	1.67752	5.13295	109.684	6.62702e-08	2.03327e-05	BC013944	chromosome 13 open reading frame 38	C13orf38	728591
AA757457	family with sequence similarity 19 (chemokine (C-C motif)-like), member A4	FAM19A4	151647	242348_at	-0.723507	0.763634	-0.554705	2.57735	-0.879471	4.25485	109.481	6.68261e-08	2.0334e-05	AA757457	family with sequence similarity 19 (chemokine (C-C motif)-like), member A4	FAM19A4	151647
BC021286	chromosome 1 open reading frame 187	C1orf187	374946	1554340_a_at	-0.845622	1.70459	-0.758202	2.77414	-1.06653	4.38507	109.341	6.72109e-08	2.0334e-05	BC021286	chromosome 1 open reading frame 187	C1orf187	374946
AK026566	chromosome X open reading frame 61	CXorf61	203413	1559258_a_at	-0.24713	3.62731	0.164438	-0.678577	-0.619215	3.92916	109.117	6.78329e-08	2.0334e-05	AK026566	chromosome X open reading frame 61	CXorf61	203413
NM_007274	acyl-CoA thioesterase 7	ACOT7	11332	208002_s_at	-1.92913	1.63893	-0.948636	0.663158	1.57313	8.38727	109.054	6.8011e-08	2.0334e-05	NM_007274	acyl-CoA thioesterase 7	ACOT7	11332
AI802969	---	---		242909_at	-0.846902	2.47847	-0.74899	1.90733	-0.751484	4.57974	108.771	6.88106e-08	2.04237e-05	AI802969	---	---
U94364	glycogenin 2	GYG2	8908	210964_s_at	-0.0564169	1.40493	-0.904105	2.14957	-1.2422	5.97179	108.234	7.03596e-08	2.07705e-05	U94364	glycogenin 2	GYG2	8908
BF446180	programmed cell death 2	PDCD2	5134	213581_at	-1.81356	0.928854	-1.44674	0.839303	1.9089	7.67618	107.873	7.14265e-08	2.09721e-05	BF446180	programmed cell death 2	PDCD2	5134
NM_006143	G protein-coupled receptor 19	GPR19	2842	207183_at	-0.7728	1.73062	-0.436843	3.5414	-1.87378	6.00413	107.608	7.22194e-08	2.10915e-05	NM_006143	G protein-coupled receptor 19	GPR19	2842
AW974812	---	---		222325_at	-1.4514	2.8969	-0.209118	3.50077	-1.70866	5.09348	107.08	7.38367e-08	2.13357e-05	AW974812	---	---
BE613178	cystathionine-beta-synthase	CBS	875	212816_s_at	-1.98961	1.89797	-2.75076	2.33405	1.63476	7.69891	106.892	7.44233e-08	2.1392e-05	BE613178	cystathionine-beta-synthase	CBS	875
AK092243	PHD finger protein 21B	PHF21B	112885	1562309_s_at	-0.553485	2.95454	-0.373439	1.41561	-1.12614	4.68942	106.722	7.49561e-08	2.14139e-05	AK092243	PHD finger protein 21B	PHF21B	112885
AL135396	family with sequence similarity 72, member A /// family with sequence similarity 72, member B /// family with sequence similarity 72, member C /// family with sequence similarity 72, member D	FAM72A /// FAM72B /// FAM72C /// FAM72D		225834_at	-2.71859	2.17651	-2.93552	3.92941	1.3305	8.4206	106.423	7.59079e-08	2.14586e-05	AL135396	family with sequence similarity 72, member A /// family with sequence similarity 72, member B /// family with sequence similarity 72, member C /// family with sequence similarity 72, member D	FAM72A /// FAM72B /// FAM72C /// FAM72D
NM_018423	serine/threonine/tyrosine kinase 1	STYK1	55359	220030_at	-2.07332	-0.215392	-1.76505	0.367441	3.07686	5.69149	106.324	7.62268e-08	2.14586e-05	NM_018423	serine/threonine/tyrosine kinase 1	STYK1	55359
BE927766	---	---		241893_at	-0.45547	2.81916	-0.672881	1.6373	-1.12719	4.98779	105.906	7.75918e-08	2.1478e-05	BE927766	---	---
NM_018098	epithelial cell transforming sequence 2 oncogene	ECT2	1894	219787_s_at	-1.95825	2.05591	-2.61174	2.50751	1.34243	8.27894	105.694	7.82926e-08	2.1478e-05	NM_018098	epithelial cell transforming sequence 2 oncogene	ECT2	1894
BF057809	---	---		237911_at	-1.19913	6.85939	1.8199	-1.11494	-1.5573	5.16607	105.426	7.91908e-08	2.1478e-05	BF057809	---	---
AA491949	---	---		241897_at	-0.614419	3.63738	0.625422	2.67725	-2.79982	6.7671	105.355	7.94332e-08	2.1478e-05	AA491949	---	---
NM_006875	pim-2 oncogene	PIM2	11040	204269_at	-0.74301	1.21045	-0.70256	2.44625	-0.822934	7.11004	105.274	7.9707e-08	2.1478e-05	NM_006875	pim-2 oncogene	PIM2	11040
BF111626	centromere protein N	CENPN	55839	228559_at	-1.95383	0.779891	-0.617429	2.10058	0.705106	7.1779	105.176	8.0041e-08	2.1478e-05	BF111626	centromere protein N	CENPN	55839
AI670947	connector enhancer of kinase suppressor of Ras 2	CNKSR2	22866	229116_at	-1.78235	1.58029	-1.47181	0.585172	1.84668	5.83951	105.121	8.02285e-08	2.1478e-05	AI670947	connector enhancer of kinase suppressor of Ras 2	CNKSR2	22866
AA594937	cordon-bleu homolog (mouse)	COBL	23242	213050_at	-0.645582	2.91039	-0.508772	2.57939	-1.70496	6.7239	104.04	8.40476e-08	2.2282e-05	AA594937	cordon-bleu homolog (mouse)	COBL	23242
NM_003385	visinin-like 1	VSNL1	7447	203798_s_at	-2.14318	0.0925027	-1.94355	1.77335	2.22581	6.2086	102.921	8.82324e-08	2.30404e-05	NM_003385	visinin-like 1	VSNL1	7447
AA939270	importin 7	IPO7	10527	200993_at	-0.94619	0.887355	-2.3847	1.29151	1.3792	9.98863	102.545	8.96968e-08	2.31751e-05	AA939270	importin 7	IPO7	10527
AK093435	hypothetical locus LOC388666	FLJ36116	388666	1564413_at	-0.850772	3.53246	-0.042538	1.89195	-1.55966	6.8777	102.443	9.00971e-08	2.31751e-05	AK093435	hypothetical locus LOC388666	FLJ36116	388666
M32721	poly (ADP-ribose) polymerase 1	PARP1	142	208644_at	-1.86734	1.73908	-0.795476	1.84498	0.587974	9.77903	102.346	9.04814e-08	2.31751e-05	M32721	poly (ADP-ribose) polymerase 1	PARP1	142
AA825721	---	---		242228_at	-1.42413	2.10093	-1.7275	2.14914	0.442726	5.73436	102.163	9.12147e-08	2.31751e-05	AA825721	---	---
AF268617	POU class 5 homeobox 1 pseudogene 3	POU5F1P3	642559	210265_x_at	-1.38297	2.44198	-1.6946	4.56882	-1.34717	7.55968	101.851	9.24769e-08	2.33817e-05	AF268617	POU class 5 homeobox 1 pseudogene 3	POU5F1P3	642559
AF519622	hypothetical protein LOC283027	LOC283027	283027	1562527_at	-0.538436	2.79432	-0.71255	1.25806	-0.756676	4.10546	101.425	9.42339e-08	2.37161e-05	AF519622	hypothetical protein LOC283027	LOC283027	283027
BG164358	DEAD (Asp-Glu-Ala-Asp) box polypeptide 21	DDX21	9188	224654_at	-1.2716	1.33432	-2.1016	0.707721	1.75609	10.1457	100.632	9.76183e-08	2.44126e-05	BG164358	DEAD (Asp-Glu-Ala-Asp) box polypeptide 21	DDX21	9188
BC020935	---	---		1569023_a_at	-0.682954	5.63357	-0.646525	0.346183	-0.994674	4.62727	100.568	9.78954e-08	2.44126e-05	BC020935	---	---
BC001305	ELOVL family member 6, elongation of long chain fatty acids (FEN1/Elo2, SUR4/Elo3-like, yeast)	ELOVL6	79071	210868_s_at	-1.98453	1.78742	-1.70094	0.85567	1.95224	6.84967	100.393	9.86642e-08	2.44925e-05	BC001305	ELOVL family member 6, elongation of long chain fatty acids (FEN1/Elo2, SUR4/Elo3-like, yeast)	ELOVL6	79071
R56118	Hypothetical protein LOC100288092	LOC100288092	100288092	235147_at	-1.45897	0.00105218	-1.49913	0.446354	2.16047	5.23892	100.084	1.0004e-07	2.45372e-05	R56118	Hypothetical protein LOC100288092	LOC100288092	100288092
AI435595	transmembrane protein 132B	TMEM132B	114795	236824_at	-1.01849	3.23851	-0.733388	2.62476	-1.32192	4.72859	100.05	1.00192e-07	2.45372e-05	AI435595	transmembrane protein 132B	TMEM132B	114795
NM_002590	protocadherin 8	PCDH8	5100	206935_at	-0.800632	1.71472	-0.587019	2.13995	-0.806228	4.1939	99.318	1.03554e-07	2.5135e-05	NM_002590	protocadherin 8	PCDH8	5100
AL832146	---	---		1562235_s_at	-0.818102	2.84813	1.15555	1.26336	-1.74388	5.35794	98.9849	1.05128e-07	2.52923e-05	AL832146	---	---
NM_032805	zinc finger and SCAN domain containing 10	ZSCAN10	84891	1553874_a_at	-0.851178	3.22407	-1.00176	1.7793	-0.74187	5.8366	98.6348	1.06814e-07	2.55852e-05	NM_032805	zinc finger and SCAN domain containing 10	ZSCAN10	84891
AK001166	DEP domain containing 1B	DEPDC1B	55789	226980_at	-2.54362	2.46611	-1.96165	2.09896	1.63004	6.8282	97.6928	1.11517e-07	2.63648e-05	AK001166	DEP domain containing 1B	DEPDC1B	55789
AA572726	---	---		244610_x_at	-0.753669	2.11974	0.320764	1.65537	-1.27033	5.15428	96.9682	1.15306e-07	2.70267e-05	AA572726	---	---
AU156421	---	---		233413_at	-0.776194	5.77947	-0.636646	0.393901	-0.988466	4.50478	96.7333	1.16568e-07	2.71195e-05	AU156421	---	---
AI950078	zinc finger protein 398	ZNF398	57541	228145_s_at	-1.41412	2.07202	-1.44592	3.04938	-0.345528	8.20888	96.7008	1.16744e-07	2.71195e-05	AI950078	zinc finger protein 398	ZNF398	57541
AA514237	hypothetical LOC100509655	LOC100509655	100509655	239781_at	-0.830159	0.851866	-0.738403	3.45426	-1.26437	5.85797	96.5036	1.17819e-07	2.71195e-05	AA514237	hypothetical LOC100509655	LOC100509655	100509655
BF739979	pyruvate dehydrogenase (lipoamide) alpha 1	PDHA1	5160	200979_at	-1.68022	0.168701	-1.15228	1.43369	1.43638	7.46251	96.4369	1.18185e-07	2.71195e-05	BF739979	pyruvate dehydrogenase (lipoamide) alpha 1	PDHA1	5160
AI701943	---	---		243233_at	-0.812674	2.15544	-0.150416	2.05688	-1.17678	5.18277	96.1306	1.19884e-07	2.71697e-05	AI701943	---	---
AW135279	cyclin Y-like 1	CCNYL1	151195	228810_at	-1.48858	1.49566	-1.60162	1.91669	0.779981	6.063	96.1284	1.19896e-07	2.71697e-05	AW135279	cyclin Y-like 1	CCNYL1	151195
AF119847	---	---		234032_at	-0.719374	3.18179	-0.193325	2.1869	-1.67027	5.86362	95.8174	1.21653e-07	2.74117e-05	AF119847	---	---
NM_014317	prenyl (decaprenyl) diphosphate synthase, subunit 1	PDSS1	23590	220865_s_at	-1.81319	0.868356	-1.86134	0.923435	2.14901	6.587	95.6867	1.224e-07	2.74117e-05	NM_014317	prenyl (decaprenyl) diphosphate synthase, subunit 1	PDSS1	23590
AI129626	doublecortin-like kinase 1	DCLK1	9201	229800_at	-1.36942	3.85706	-0.837601	2.55392	-1.06048	5.63473	95.6745	1.2247e-07	2.74117e-05	AI129626	doublecortin-like kinase 1	DCLK1	9201
BF108778	---	---		235363_at	-2.25047	3.12682	-1.81522	2.35894	0.845719	6.82289	95.413	1.23984e-07	2.76372e-05	BF108778	---	---
AI934407	dehydrogenase E1 and transketolase domain containing 1	DHTKD1	55526	227094_at	-1.49462	1.76772	-1.90484	1.96092	0.867989	8.00829	95.1041	1.258e-07	2.77729e-05	AI934407	dehydrogenase E1 and transketolase domain containing 1	DHTKD1	55526
AI953354	---	---		232254_at	-1.33191	0.889971	-1.15051	-0.0568999	1.84019	6.03066	94.8522	1.27306e-07	2.77729e-05	AI953354	---	---
R43158	fragile X mental retardation, autosomal homolog 1	FXR1	8087	230201_at	-2.03431	2.23342	-0.606756	1.54159	0.666615	6.66802	94.8098	1.27562e-07	2.77729e-05	R43158	fragile X mental retardation, autosomal homolog 1	FXR1	8087
AA825563	---	---		239292_at	-0.331861	2.52401	-1.35291	2.32043	-1.15449	5.35251	94.7963	1.27643e-07	2.77729e-05	AA825563	---	---
NM_018131	centrosomal protein 55kDa	CEP55	55165	218542_at	-1.72198	1.48545	-1.50873	1.7522	1.06452	7.13942	94.5968	1.28855e-07	2.78194e-05	NM_018131	centrosomal protein 55kDa	CEP55	55165
AK025651	hypothetical LOC100507192	LOC100507192	100507192	221648_s_at	-1.19297	1.4218	-1.07908	1.89613	0.174341	5.48228	93.9132	1.33117e-07	2.86216e-05	AK025651	hypothetical LOC100507192	LOC100507192	100507192
AI801563	Carbonic anhydrase VB pseudogene	CA5BP	340591	239106_at	-1.48931	0.611808	-1.55602	1.48565	1.33229	5.99616	93.7907	1.33898e-07	2.86768e-05	AI801563	Carbonic anhydrase VB pseudogene	CA5BP	340591
NM_152476	zinc finger protein 560	ZNF560	147741	1553276_at	-0.620464	1.49158	-0.658203	1.92038	-0.718182	4.06127	92.5729	1.41979e-07	2.98045e-05	NM_152476	zinc finger protein 560	ZNF560	147741
AW294765	F-box protein 22	FBXO22	26263	225734_at	-1.57134	1.04592	-1.96971	1.5239	1.51991	7.53919	92.349	1.4353e-07	2.98045e-05	AW294765	F-box protein 22	FBXO22	26263
AA669336	coagulation factor C homolog, cochlin (Limulus polyphemus)	COCH	1690	205229_s_at	-2.46452	0.717678	-2.34773	1.04769	3.09199	7.67889	91.9794	1.46133e-07	3.02302e-05	AA669336	coagulation factor C homolog, cochlin (Limulus polyphemus)	COCH	1690
BF059748	glucosaminyl (N-acetyl) transferase 2, I-branching enzyme (I blood group)	GCNT2	2651	230788_at	-1.45024	4.6527	-0.180517	2.88635	-1.90454	6.92845	91.6841	1.48255e-07	3.05533e-05	BF059748	glucosaminyl (N-acetyl) transferase 2, I-branching enzyme (I blood group)	GCNT2	2651
AW772140	WD repeat and HMG-box DNA binding protein 1	WDHD1	11169	204727_at	-1.85348	1.90691	-1.92491	2.87943	0.581504	5.44578	91.0766	1.52739e-07	3.12434e-05	AW772140	WD repeat and HMG-box DNA binding protein 1	WDHD1	11169
NM_014321	origin recognition complex, subunit 6	ORC6	23594	219105_x_at	-1.86082	1.68558	-0.446645	1.25386	0.760818	9.41436	91.0755	1.52747e-07	3.12434e-05	NM_014321	origin recognition complex, subunit 6	ORC6	23594
AL533838	tubulin, beta 2B	TUBB2B	347733	214023_x_at	-0.876936	4.26528	1.07225	2.95573	-3.23015	8.56065	90.8826	1.54205e-07	3.1424e-05	AL533838	tubulin, beta 2B	TUBB2B	347733
AV730849	SLAIN motif family, member 1	SLAIN1	122060	225619_at	-2.12763	0.710958	-2.06854	0.521715	2.92186	6.73439	90.628	1.56156e-07	3.17032e-05	AV730849	SLAIN motif family, member 1	SLAIN1	122060
NM_031283	transcription factor 7-like 1 (T-cell specific, HMG-box)	TCF7L1	83439	221016_s_at	0.092824	3.11159	-0.199618	1.92645	-2.28124	7.08358	90.1256	1.60095e-07	3.23825e-05	NM_031283	transcription factor 7-like 1 (T-cell specific, HMG-box)	TCF7L1	83439
BC005170	minichromosome maintenance complex component 8	MCM8	84515	224320_s_at	-2.11493	1.17446	-1.61193	1.79889	1.5988	6.11698	89.8618	1.62211e-07	3.26894e-05	BC005170	minichromosome maintenance complex component 8	MCM8	84515
AF232238	hairy/enhancer-of-split related with YRPW motif 2	HEY2	23493	222921_s_at	0.121628	1.52182	0.457225	1.79767	-2.13216	6.46478	89.3401	1.66498e-07	3.34299e-05	AF232238	hairy/enhancer-of-split related with YRPW motif 2	HEY2	23493
AV733347	partner of NOB1 homolog (S. cerevisiae)	PNO1	56902	242905_at	-1.54768	0.286744	-1.67128	1.33989	1.67302	5.84834	88.063	1.77588e-07	3.51471e-05	AV733347	partner of NOB1 homolog (S. cerevisiae)	PNO1	56902
AJ271832	protein phosphatase, Mg2+/Mn2+ dependent, 1B	PPM1B	5495	213225_at	-1.14029	2.76169	-1.29585	1.81229	-0.124565	8.40313	87.868	1.79359e-07	3.53348e-05	AJ271832	protein phosphatase, Mg2+/Mn2+ dependent, 1B	PPM1B	5495
NM_007309	diaphanous homolog 2 (Drosophila)	DIAPH2	1730	205603_s_at	-2.43538	2.22823	-1.31808	3.51886	0.225455	7.52133	87.581	1.82006e-07	3.53734e-05	NM_007309	diaphanous homolog 2 (Drosophila)	DIAPH2	1730
AU150319	vesicle-associated membrane protein 1 (synaptobrevin 1)	VAMP1	6843	213326_at	-1.52252	1.83923	-0.670788	2.77394	-0.492659	7.22582	87.4207	1.83505e-07	3.54912e-05	AU150319	vesicle-associated membrane protein 1 (synaptobrevin 1)	VAMP1	6843
AW513477	zinc finger protein 721	ZNF721	170960	228029_at	-1.81246	2.48717	0.336106	1.3584	-0.146266	8.22995	87.3774	1.83912e-07	3.54912e-05	AW513477	zinc finger protein 721	ZNF721	170960
NM_004289	nuclear factor (erythroid-derived 2)-like 3	NFE2L3	9603	204702_s_at	-1.82686	2.49485	-1.35623	3.88846	-0.692906	6.88903	87.2654	1.84972e-07	3.557e-05	NM_004289	nuclear factor (erythroid-derived 2)-like 3	NFE2L3	9603
NM_014875	kinesin family member 14	KIF14	9928	206364_at	-2.34657	1.36082	-1.17903	2.65378	0.909793	7.88653	86.608	1.9134e-07	3.66655e-05	NM_014875	kinesin family member 14	KIF14	9928
U00238	phosphoribosyl pyrophosphate amidotransferase	PPAT	5471	209434_s_at	-1.5552	1.70897	-1.80465	1.54466	1.15887	7.94782	86.4048	1.93362e-07	3.67947e-05	U00238	phosphoribosyl pyrophosphate amidotransferase	PPAT	5471
AI027091	transmembrane protein 232	TMEM232	642987	239776_at	-0.721236	1.78748	-0.691668	1.73435	-0.569711	3.87321	86.0836	1.96611e-07	3.71541e-05	AI027091	transmembrane protein 232	TMEM232	642987
AI620827	zinc finger protein 600	ZNF600	162966	242463_x_at	-0.653044	3.40433	-0.699507	1.58407	-1.07144	5.56728	85.8376	1.99146e-07	3.73745e-05	AI620827	zinc finger protein 600	ZNF600	162966
AB040910	MAP/microtubule affinity-regulating kinase 1	MARK1	4139	226653_at	-1.50224	0.597869	-1.26631	1.71126	1.00631	5.57285	85.7616	1.99937e-07	3.73944e-05	AB040910	MAP/microtubule affinity-regulating kinase 1	MARK1	4139
W57613	---	---		236180_at	-0.347443	1.35939	-0.07668	1.92429	-1.33742	5.97825	85.5985	2.01647e-07	3.75855e-05	W57613	---	---
U56725	heat shock 70kDa protein 2	HSPA2	3306	211538_s_at	2.07773	3.10445	-0.209868	0.377091	-3.22402	7.96378	85.4862	2.02835e-07	3.76783e-05	U56725	heat shock 70kDa protein 2	HSPA2	3306
AL577977	chromosome 12 open reading frame 32	C12orf32	83695	225837_at	-1.6571	0.27861	-1.52395	2.67738	0.795282	7.7691	85.41	2.03647e-07	3.77009e-05	AL577977	chromosome 12 open reading frame 32	C12orf32	83695
N32872	PRP38 pre-mRNA processing factor 38 (yeast) domain containing B	PRPF38B	55119	230270_at	-1.7827	1.89401	0.388226	1.02085	0.211973	6.88273	84.9768	2.08332e-07	3.81097e-05	N32872	PRP38 pre-mRNA processing factor 38 (yeast) domain containing B	PRPF38B	55119
AI672541	imprinted in Prader-Willi syndrome (non-protein coding)	IPW	3653	213447_at	-1.40705	2.75267	-1.48117	1.51822	0.464798	8.45865	84.9018	2.09156e-07	3.81097e-05	AI672541	imprinted in Prader-Willi syndrome (non-protein coding)	IPW	3653
AL519818	cirrhosis, autosomal recessive 1A (cirhin)	CIRH1A	84916	224903_at	-1.41704	0.692998	-0.583103	0.798163	1.04266	9.67147	84.8848	2.09344e-07	3.81097e-05	AL519818	cirrhosis, autosomal recessive 1A (cirhin)	CIRH1A	84916
NM_022782	M-phase phosphoprotein 9	MPHOSPH9	10198	206205_at	-1.31901	0.87614	-1.88106	1.64249	1.18601	6.51915	84.3943	2.14841e-07	3.89805e-05	NM_022782	M-phase phosphoprotein 9	MPHOSPH9	10198
BC007257	cystathionine-beta-synthase	CBS	875	1553972_a_at	-2.02629	1.76733	-1.89235	2.21393	1.22279	8.82173	84.2337	2.1668e-07	3.9184e-05	BC007257	cystathionine-beta-synthase	CBS	875
AK026714	Pellino homolog 1 (Drosophila)	PELI1	57162	232304_at	-0.699776	1.82124	-0.972727	2.19403	-0.721508	5.07131	83.9964	2.19431e-07	3.95505e-05	AK026714	Pellino homolog 1 (Drosophila)	PELI1	57162
AA843962	anoctamin 5	ANO5	203859	229313_at	-2.1516	0.277461	-1.63794	0.638767	2.72523	6.96612	83.8941	2.2063e-07	3.96358e-05	AA843962	anoctamin 5	ANO5	203859
NM_020445	ARP3 actin-related protein 3 homolog B (yeast)	ACTR3B	57180	218868_at	-1.93624	0.770829	-1.63416	2.04971	1.40226	7.279	83.5864	2.24286e-07	4.01604e-05	NM_020445	ARP3 actin-related protein 3 homolog B (yeast)	ACTR3B	57180
BF476502	guanine nucleotide binding protein (G protein), alpha activating activity polypeptide, olfactory type	GNAL	2774	213924_at	-0.827737	1.72805	-0.588891	2.58626	-1.07986	6.95569	83.2779	2.28025e-07	4.06965e-05	BF476502	guanine nucleotide binding protein (G protein), alpha activating activity polypeptide, olfactory type	GNAL	2774
AW025141	shroom family member 3	SHROOM3	57619	228400_at	-1.06836	2.13596	-0.890192	2.34411	-0.612904	6.85961	83.0351	2.3102e-07	4.09633e-05	AW025141	shroom family member 3	SHROOM3	57619
AF131749	seizure related 6 homolog (mouse)-like 2	SEZ6L2	26470	233337_s_at	0.783519	1.29605	-0.436415	1.40334	-1.86015	7.00676	82.4524	2.3841e-07	4.20008e-05	AF131749	seizure related 6 homolog (mouse)-like 2	SEZ6L2	26470
BF062139	polymerase (RNA) III (DNA directed) polypeptide G (32kD)	POLR3G	10622	206653_at	-2.43753	2.5564	-1.41691	2.35534	0.959781	6.30184	81.7193	2.48118e-07	4.32922e-05	BF062139	polymerase (RNA) III (DNA directed) polypeptide G (32kD)	POLR3G	10622
AI810054	DEP domain containing 1	DEPDC1	55635	235545_at	-1.96689	0.942704	-2.22005	2.73522	1.30921	7.38633	81.1676	2.55743e-07	4.43393e-05	AI810054	DEP domain containing 1	DEPDC1	55635
NM_004973	jumonji, AT rich interactive domain 2	JARID2	3720	203298_s_at	-0.537397	3.41077	-0.724659	1.44252	-1.0781	9.33331	81.0917	2.56814e-07	4.43841e-05	NM_004973	jumonji, AT rich interactive domain 2	JARID2	3720
AA524029	family with sequence similarity 189, member A2	FAM189A2	9413	213900_at	-0.455012	0.968238	-0.18278	2.04219	-1.10734	5.94366	80.9747	2.58476e-07	4.45241e-05	AA524029	family with sequence similarity 189, member A2	FAM189A2	9413
AI129310	chromosome 13 open reading frame 18	C13orf18	80183	44790_s_at	-0.718197	1.81428	-0.576788	2.06269	-0.877162	4.19946	80.9202	2.59255e-07	4.45241e-05	AI129310	chromosome 13 open reading frame 18	C13orf18	80183
AI971694	RNA binding motif protein, X-linked-like 1	RBMXL1	494115	227748_at	-1.17527	1.55957	-1.34649	0.572174	1.17162	7.27992	80.7668	2.61462e-07	4.47624e-05	AI971694	RNA binding motif protein, X-linked-like 1	RBMXL1	494115
AF001294	pleckstrin homology-like domain, family A, member 2	PHLDA2	7262	209803_s_at	0.0811827	2.84754	-0.432086	2.69287	-2.53756	6.88825	80.3352	2.67796e-07	4.56033e-05	AF001294	pleckstrin homology-like domain, family A, member 2	PHLDA2	7262
AA045257	Pentatricopeptide repeat domain 3	PTCD3	55037	228590_at	-1.97433	0.77716	-0.488332	1.82145	0.826533	7.34385	80.2702	2.68765e-07	4.56033e-05	AA045257	Pentatricopeptide repeat domain 3	PTCD3	55037
AA642341	G2/M-phase specific E3 ubiquitin protein ligase	G2E3	55632	223255_at	-1.45974	0.922159	-0.962367	0.979932	1.14065	7.60475	80.2626	2.68879e-07	4.56033e-05	AA642341	G2/M-phase specific E3 ubiquitin protein ligase	G2E3	55632
NM_014618	deleted in bladder cancer 1	DBC1	1620	205818_at	-0.270153	1.6845	0.178523	1.81041	-1.6173	5.90805	80.1503	2.70565e-07	4.56149e-05	NM_014618	deleted in bladder cancer 1	DBC1	1620
AF268615	POU class 5 homeobox 1B	POU5F1B	5462	214532_x_at	-1.01792	2.03751	-0.866335	3.17787	-1.20227	7.99566	80.1469	2.70617e-07	4.56149e-05	AF268615	POU class 5 homeobox 1B	POU5F1B	5462
AF394735	MAD2 mitotic arrest deficient-like 1 (yeast)	MAD2L1	4085	1554768_a_at	-1.6229	-1.41764	-2.55516	1.96087	2.49164	7.90065	79.2185	2.85069e-07	4.73539e-05	AF394735	MAD2 mitotic arrest deficient-like 1 (yeast)	MAD2L1	4085
NM_006636	methylenetetrahydrofolate dehydrogenase (NADP+ dependent) 2, methenyltetrahydrofolate cyclohydrolase	MTHFD2	10797	201761_at	-1.44687	1.24464	-2.00829	1.53681	1.34631	10.6725	79.1254	2.8657e-07	4.73539e-05	NM_006636	methylenetetrahydrofolate dehydrogenase (NADP+ dependent) 2, methenyltetrahydrofolate cyclohydrolase	MTHFD2	10797
AI703476	G protein-coupled receptor 27	GPR27	2850	227769_at	-1.20862	2.4472	-0.333583	3.95833	-2.02361	5.89026	79.0666	2.87524e-07	4.73539e-05	AI703476	G protein-coupled receptor 27	GPR27	2850
AF212225	mitochondrial ribosomal protein L1	MRPL1	65008	223154_at	-0.960979	0.385942	-1.0298	-0.93578	2.14272	8.81091	79.048	2.87825e-07	4.73539e-05	AF212225	mitochondrial ribosomal protein L1	MRPL1	65008
AK025271	---	---		216170_at	-0.614946	0.931399	-0.604915	2.18186	-0.746817	4.71913	78.8549	2.90986e-07	4.75796e-05	AK025271	---	---
AF332473	carbohydrate (N-acetylgalactosamine 4-0) sulfotransferase 9	CHST9	83539	224400_s_at	-1.21417	1.00078	-1.27425	-1.10455	2.46645	5.14145	78.6016	2.95195e-07	4.78934e-05	AF332473	carbohydrate (N-acetylgalactosamine 4-0) sulfotransferase 9	CHST9	83539
AW237089	hypothetical protein LOC253842 /// nuclear receptor subfamily 6, group A, member 1	LOC253842 /// NR6A1		228894_at	-1.23176	1.82295	-0.677088	2.87489	-0.841092	7.30275	78.5326	2.96353e-07	4.78934e-05	AW237089	hypothetical protein LOC253842 /// nuclear receptor subfamily 6, group A, member 1	LOC253842 /// NR6A1
AK025298	autism susceptibility candidate 2	AUTS2	26053	212599_at	-2.19114	1.65028	-1.2205	1.96316	1.14594	8.59282	78.2682	3.00849e-07	4.80886e-05	AK025298	autism susceptibility candidate 2	AUTS2	26053
AA760738	---	---		229483_at	-0.536675	1.46776	-0.474727	2.30685	-1.17399	5.7465	78.2478	3.01199e-07	4.80886e-05	AA760738	---	---
NM_000161	GTP cyclohydrolase 1	GCH1	2643	204224_s_at	-1.93463	2.03073	-1.76743	1.87467	1.18623	6.77183	78.2035	3.01961e-07	4.80886e-05	NM_000161	GTP cyclohydrolase 1	GCH1	2643
AI761824	zinc finger protein 398	ZNF398	57541	226202_at	-1.23205	1.10945	-1.62911	3.3199	-0.264955	7.45969	78.0046	3.05412e-07	4.84868e-05	AI761824	zinc finger protein 398	ZNF398	57541
AW299520	imprinted in Prader-Willi syndrome (non-protein coding)	IPW	3653	241834_at	-1.40074	2.37108	-1.60529	2.25694	0.175942	5.83072	77.8146	3.08754e-07	4.88203e-05	AW299520	imprinted in Prader-Willi syndrome (non-protein coding)	IPW	3653
BE464819	---	---		239231_at	-1.70241	2.29011	-1.25435	2.68152	-0.0124055	6.90861	77.7838	3.093e-07	4.88203e-05	BE464819	---	---
BG029530	jumonji, AT rich interactive domain 2	JARID2	3720	203297_s_at	-0.458042	3.05064	0.0304305	0.981063	-1.23317	9.4974	77.6888	3.10992e-07	4.89291e-05	BG029530	jumonji, AT rich interactive domain 2	JARID2	3720
NM_005012	receptor tyrosine kinase-like orphan receptor 1	ROR1	4919	205805_s_at	-0.30217	2.011	0.476662	1.79478	-1.88246	6.561	77.6397	3.11871e-07	4.89291e-05	NM_005012	receptor tyrosine kinase-like orphan receptor 1	ROR1	4919
AI809108	nudix (nucleoside diphosphate linked moiety X)-type motif 16	NUDT16	131870	228341_at	-1.2745	0.44525	-1.18455	1.32974	1.02929	5.53832	77.5948	3.12678e-07	4.89291e-05	AI809108	nudix (nucleoside diphosphate linked moiety X)-type motif 16	NUDT16	131870
AI634411	---	---		230785_at	-0.695581	1.7752	-0.707904	2.50261	-1.09262	5.36965	77.5439	3.13593e-07	4.89321e-05	AI634411	---	---
NM_004856	kinesin family member 23	KIF23	9493	204709_s_at	-2.65605	1.84987	-1.95579	2.88348	1.42097	6.96047	77.346	3.1719e-07	4.93524e-05	NM_004856	kinesin family member 23	KIF23	9493
AI625235	non-protein coding RNA 275	NCRNA00275	441951	229899_s_at	-1.21405	2.54493	-1.45136	1.17607	0.549275	6.67349	77.285	3.18307e-07	4.93856e-05	AI625235	non-protein coding RNA 275	NCRNA00275	441951
AL537395	junctophilin 3	JPH3	57338	229294_at	-0.467318	1.59885	-0.611924	2.62827	-1.40986	5.13053	76.9341	3.24836e-07	5.00478e-05	AL537395	junctophilin 3	JPH3	57338
BE503640	CUGBP, Elav-like family member 5	CELF5	60680	230497_at	-0.386615	2.57181	-0.293089	1.97658	-1.59298	6.2167	76.9082	3.25325e-07	5.00478e-05	BE503640	CUGBP, Elav-like family member 5	CELF5	60680
NM_031218	zinc finger protein 93	ZNF93	81931	208119_s_at	-1.01993	1.95061	-0.12313	2.16026	-0.988353	7.00526	76.6608	3.30033e-07	5.04477e-05	NM_031218	zinc finger protein 93	ZNF93	81931
NM_003577	undifferentiated embryonic cell transcription factor 1	UTF1	8433	208275_x_at	-0.754263	3.8733	0.129819	0.454933	-0.926671	5.65922	76.5945	3.3131e-07	5.04477e-05	NM_003577	undifferentiated embryonic cell transcription factor 1	UTF1	8433
NM_004270	mediator complex subunit 7	MED7	9443	204350_s_at	0.437261	0.333203	-2.44919	-0.0647942	1.12766	7.72518	76.3658	3.35758e-07	5.07943e-05	NM_004270	mediator complex subunit 7	MED7	9443
AK090649	---	---		1566084_at	-1.07027	2.12	-1.50287	2.34561	-0.198228	5.58895	76.234	3.38355e-07	5.09812e-05	AK090649	---	---
AI332764	family with sequence similarity 119, member A	FAM119A	151194	235931_at	-1.59921	0.245408	-1.81697	1.47055	1.74836	7.27768	76.0717	3.41586e-07	5.12366e-05	AI332764	family with sequence similarity 119, member A	FAM119A	151194
AI802048	unc-5 homolog D (C. elegans)	UNC5D	137970	231325_at	-1.53536	4.01872	0.572146	1.8308	-1.40618	6.18957	76.0294	3.42434e-07	5.12366e-05	AI802048	unc-5 homolog D (C. elegans)	UNC5D	137970
N51468	non-protein coding RNA 292	NCRNA00292	642946	235126_at	-1.3867	1.69319	-0.736549	1.95111	0.0125915	7.6807	75.9676	3.43678e-07	5.12823e-05	N51468	non-protein coding RNA 292	NCRNA00292	642946
U90902	T-cell lymphoma invasion and metastasis 1	TIAM1	7074	213135_at	-0.441192	2.25065	0.0167229	2.47719	-1.97164	7.18475	75.778	3.47529e-07	5.1575e-05	U90902	T-cell lymphoma invasion and metastasis 1	TIAM1	7074
AI823766	cyclin-dependent kinase 12	CDK12	51755	225694_at	-1.20456	1.06791	-1.43597	0.985462	1.14893	7.47923	75.6905	3.49324e-07	5.15853e-05	AI823766	cyclin-dependent kinase 12	CDK12	51755
AA824298	Zwilch, kinetochore associated, homolog (Drosophila)	ZWILCH	55055	222606_at	-1.93893	2.16907	-0.521092	1.61196	0.488661	9.00525	75.6826	3.49488e-07	5.15853e-05	AA824298	Zwilch, kinetochore associated, homolog (Drosophila)	ZWILCH	55055
M55905	malic enzyme 2, NAD(+)-dependent, mitochondrial	ME2	4200	210154_at	-1.39788	-0.511527	-2.37043	0.521467	2.80104	7.21586	75.1657	3.6033e-07	5.28998e-05	M55905	malic enzyme 2, NAD(+)-dependent, mitochondrial	ME2	4200
AK024285	spermatid perinuclear RNA binding protein	STRBP	55342	223245_at	-1.77203	1.60823	-1.02887	2.17575	0.471362	7.97151	74.88	3.66501e-07	5.36614e-05	AK024285	spermatid perinuclear RNA binding protein	STRBP	55342
AL833487	Zinc finger protein 578	ZNF578	147660	1562245_a_at	-0.435498	3.12079	-0.540598	0.857744	-0.816196	4.08515	74.3928	3.77318e-07	5.4685e-05	AL833487	Zinc finger protein 578	ZNF578	147660
AI190287	zinc finger family member 788	ZNF788	388507	244552_at	-0.879194	2.82302	-0.59309	2.50291	-1.33503	5.42817	74.3904	3.77372e-07	5.4685e-05	AI190287	zinc finger family member 788	ZNF788	388507
AA833830	BEN domain containing 4	BEND4	389206	230896_at	-1.192	3.57105	-0.624304	2.93825	-1.54098	5.59441	74.3849	3.77497e-07	5.4685e-05	AA833830	BEN domain containing 4	BEND4	389206
AI636647	forkhead box H1	FOXH1	8928	231407_s_at	-0.77507	2.9662	-0.566795	1.99798	-1.16779	7.0957	74.2776	3.79933e-07	5.47474e-05	AI636647	forkhead box H1	FOXH1	8928
AW451711	---	---		217617_at	-0.266176	1.89824	0.487502	1.56393	-1.73419	6.45568	74.1689	3.82421e-07	5.4961e-05	AW451711	---	---
AW450929	hypothetical LOC100506653	LOC100506653	100506653	221919_at	-2.05002	0.965996	-0.830505	1.79722	1.08354	7.27627	73.946	3.87585e-07	5.54114e-05	AW450929	hypothetical LOC100506653	LOC100506653	100506653
NM_007019	ubiquitin-conjugating enzyme E2C	UBE2C	11065	202954_at	-1.95414	1.04425	-1.326	2.6015	0.755719	9.93671	73.8696	3.89374e-07	5.54416e-05	NM_007019	ubiquitin-conjugating enzyme E2C	UBE2C	11065
NM_012321	LSM4 homolog, U6 small nuclear RNA associated (S. cerevisiae)	LSM4	25804	202737_s_at	-1.90498	1.09369	-0.734138	1.23671	1.20537	9.67108	73.8504	3.89826e-07	5.54416e-05	NM_012321	LSM4 homolog, U6 small nuclear RNA associated (S. cerevisiae)	LSM4	25804
AA350425	zinc finger protein 91 pseudogene	LOC441666	441666	1559503_a_at	-0.337946	3.26614	-0.266101	-0.111385	-0.499108	3.46553	73.6437	3.94722e-07	5.58321e-05	AA350425	zinc finger protein 91 pseudogene	LOC441666	441666
BF939489	glycoprotein M6A	GPM6A	2823	209469_at	-1.34365	0.497206	-1.68291	-0.962509	2.94153	5.24549	73.521	3.97667e-07	5.58321e-05	BF939489	glycoprotein M6A	GPM6A	2823
AW272333	---	---		227600_at	-1.48905	1.59865	-0.953793	0.416311	1.31448	6.32381	73.4743	3.98794e-07	5.58321e-05	AW272333	---	---
AA603590	zinc finger protein 682	ZNF682	91120	242915_at	-1.60832	4.80351	0.369457	2.05517	-1.60927	6.5124	73.4262	3.99959e-07	5.58321e-05	AA603590	zinc finger protein 682	ZNF682	91120
U85995	Bardet-Biedl syndrome 9	BBS9	27241	37547_at	-0.88083	3.60882	-0.543691	0.898558	-0.558688	5.70986	73.3794	4.01097e-07	5.58321e-05	U85995	Bardet-Biedl syndrome 9	BBS9	27241
NM_016220	zinc finger protein 107	ZNF107	51427	205739_x_at	-1.84292	1.63037	-1.39737	1.97394	0.915083	6.59865	73.366	4.01422e-07	5.58321e-05	NM_016220	zinc finger protein 107	ZNF107	51427
AF182069	prokineticin 2	PROK2	60675	232629_at	-0.723191	0.740874	-0.620252	2.31805	-0.655629	4.45007	73.2754	4.03638e-07	5.58321e-05	AF182069	prokineticin 2	PROK2	60675
AI821565	non-protein coding RNA 173	NCRNA00173	100287569	237591_at	-0.563517	3.01647	-0.611613	1.74065	-1.19466	6.15217	73.2681	4.03817e-07	5.58321e-05	AI821565	non-protein coding RNA 173	NCRNA00173	100287569
AI753488	glutamate-cysteine ligase, modifier subunit	GCLM	2730	236140_at	-1.23295	-0.551307	-1.82276	1.00509	1.96183	6.08988	73.1389	4.07005e-07	5.60371e-05	AI753488	glutamate-cysteine ligase, modifier subunit	GCLM	2730
AI365263	developmental pluripotency associated 5	DPPA5	340168	241550_at	-0.494231	5.75727	1.05627	-1.40181	-1.1945	5.01247	72.9439	4.11875e-07	5.62343e-05	AI365263	developmental pluripotency associated 5	DPPA5	340168
BC016767	---	---		1554599_x_at	-1.14386	0.541728	-1.29574	1.8201	0.613705	7.54861	72.8609	4.13966e-07	5.62655e-05	BC016767	---	---
BE930512	Mdm2 p53 binding protein homolog (mouse)	MDM2	4193	217542_at	-1.15854	1.5339	-0.949255	0.102463	1.21176	6.33285	72.5187	4.22737e-07	5.70047e-05	BE930512	Mdm2 p53 binding protein homolog (mouse)	MDM2	4193
AI990790	---	---		237483_at	-0.49643	2.11313	-0.376707	2.72745	-1.77511	6.37736	72.2662	4.29354e-07	5.74039e-05	AI990790	---	---
AI753792	related RAS viral (r-ras) oncogene homolog 2	RRAS2	22800	212589_at	-1.49435	2.17111	-0.588155	1.25399	0.326755	9.62446	72.2503	4.29776e-07	5.74039e-05	AI753792	related RAS viral (r-ras) oncogene homolog 2	RRAS2	22800
NM_006784	WD repeat domain 3	WDR3	10885	218882_s_at	-1.88091	0.539706	-1.04858	1.37627	1.48255	9.04321	72.2059	4.30952e-07	5.74039e-05	NM_006784	WD repeat domain 3	WDR3	10885
BQ446762	---	---		1557238_s_at	-0.942661	2.13974	-0.663866	1.8171	-0.539404	4.66601	72.0871	4.34123e-07	5.76028e-05	BQ446762	---	---
R41498	leucine rich repeat containing 8 family, member B	LRRC8B	23507	212976_at	-1.33124	0.694268	-1.23966	1.04549	1.22926	5.8193	71.9812	4.36975e-07	5.76028e-05	R41498	leucine rich repeat containing 8 family, member B	LRRC8B	23507
AF225416	SPC25, NDC80 kinetochore complex component, homolog (S. cerevisiae)	SPC25	57405	209891_at	-2.23	0.971201	-1.8657	2.48481	1.49352	6.55308	71.926	4.38468e-07	5.76028e-05	AF225416	SPC25, NDC80 kinetochore complex component, homolog (S. cerevisiae)	SPC25	57405
BG054916	patched 1	PTCH1	5727	209815_at	-1.78445	0.75608	-1.03877	3.12674	0.140447	8.14477	71.9242	4.38519e-07	5.76028e-05	BG054916	patched 1	PTCH1	5727
D32051	phosphoribosylglycinamide formyltransferase, phosphoribosylglycinamide synthetase, phosphoribosylaminoimidazole synthetase	GART	2618	210005_at	-2.29526	1.1942	-1.17506	1.72749	1.5289	6.63842	71.8833	4.39629e-07	5.76028e-05	D32051	phosphoribosylglycinamide formyltransferase, phosphoribosylglycinamide synthetase, phosphoribosylaminoimidazole synthetase	GART	2618
NM_030577	transmembrane protein 177	TMEM177	80775	218897_at	-1.73006	1.1873	-1.32314	1.38881	1.29051	7.23441	71.738	4.43609e-07	5.76028e-05	NM_030577	transmembrane protein 177	TMEM177	80775
N64622	ERI1 exoribonuclease family member 2	ERI2	112479	213365_at	-1.33938	0.749445	-1.0563	0.46001	1.48709	7.38873	71.709	4.44408e-07	5.76028e-05	N64622	ERI1 exoribonuclease family member 2	ERI2	112479
AJ006835	small nucleolar RNA host gene 3 (non-protein coding)	SNHG3	8420	215011_at	-1.42314	1.39171	-1.59714	2.05568	0.653545	6.47314	71.6985	4.44698e-07	5.76028e-05	AJ006835	small nucleolar RNA host gene 3 (non-protein coding)	SNHG3	8420
AI431643	related RAS viral (r-ras) oncogene homolog 2	RRAS2	22800	212590_at	-1.63136	1.72153	-1.89862	1.5361	1.2992	8.49385	71.4519	4.51569e-07	5.76028e-05	AI431643	related RAS viral (r-ras) oncogene homolog 2	RRAS2	22800
AF136972	protein phosphatase, Mg2+/Mn2+ dependent, 1B	PPM1B	5495	209296_at	-1.34905	2.74741	-1.31724	1.98674	-0.0130884	8.96491	71.4167	4.5256e-07	5.76028e-05	AF136972	protein phosphatase, Mg2+/Mn2+ dependent, 1B	PPM1B	5495
AF336127	solute carrier family 4, sodium borate transporter, member 11	SLC4A11	83959	223748_at	-2.21798	1.97549	-0.748922	1.44006	1.09872	7.80903	71.4008	4.53008e-07	5.76028e-05	AF336127	solute carrier family 4, sodium borate transporter, member 11	SLC4A11	83959
BF675750	phosphodiesterase 12	PDE12	201626	231839_at	-1.2962	0.626164	-0.874087	0.810642	1.12977	8.29595	71.3481	4.545e-07	5.76028e-05	BF675750	phosphodiesterase 12	PDE12	201626
N90719	---	---		242245_at	-2.01952	0.897898	-1.10661	1.9571	1.15322	6.0575	71.301	4.55837e-07	5.76028e-05	N90719	---	---
NM_014211	gamma-aminobutyric acid (GABA) A receptor, pi	GABRP	2568	205044_at	-0.807577	1.59148	0.0700429	2.2155	-1.24661	5.2856	71.2068	4.58527e-07	5.76028e-05	NM_014211	gamma-aminobutyric acid (GABA) A receptor, pi	GABRP	2568
BC001052	RecQ protein-like (DNA helicase Q1-like)	RECQL	5965	210568_s_at	-1.10873	0.594373	-1.68691	1.8589	0.795943	7.06515	71.2	4.58722e-07	5.76028e-05	BC001052	RecQ protein-like (DNA helicase Q1-like)	RECQL	5965
R46180	glycerophosphodiester phosphodiesterase domain containing 1	GDPD1	284161	238681_at	-1.2176	0.0236901	-1.25864	0.642141	1.6207	5.90934	71.1709	4.59558e-07	5.76028e-05	R46180	glycerophosphodiester phosphodiesterase domain containing 1	GDPD1	284161
D89976	5-aminoimidazole-4-carboxamide ribonucleotide formyltransferase/IMP cyclohydrolase	ATIC	471	208758_at	-1.55267	0.546732	-1.22506	1.73112	1.03306	10.2305	71.1627	4.59795e-07	5.76028e-05	D89976	5-aminoimidazole-4-carboxamide ribonucleotide formyltransferase/IMP cyclohydrolase	ATIC	471
BC037816	---	---		1562828_at	-1.27802	3.45039	0.610307	2.18882	-1.73819	5.53941	71.1601	4.59869e-07	5.76028e-05	BC037816	---	---
AW009436	Chromosome 1 open reading frame 104	C1orf104	284618	230256_at	-1.5692	-0.0405526	-1.25187	2.30796	0.878659	6.53656	71.095	4.61745e-07	5.77055e-05	AW009436	Chromosome 1 open reading frame 104	C1orf104	284618
AI672489	core 1 synthase, glycoprotein-N-acetylgalactosamine 3-beta-galactosyltransferase, 1	C1GALT1	56913	226105_at	-1.19167	1.48704	-1.64817	1.44627	0.830587	7.27972	70.8417	4.69139e-07	5.819e-05	AI672489	core 1 synthase, glycoprotein-N-acetylgalactosamine 3-beta-galactosyltransferase, 1	C1GALT1	56913
AK026259	---	---		234649_at	-0.498136	1.91691	-0.827966	2.41238	-1.19711	5.10057	70.8155	4.6991e-07	5.819e-05	AK026259	---	---
AW205632	---	---		238156_at	-1.76372	2.25075	-0.256353	1.50764	0.179282	7.69626	70.7905	4.70649e-07	5.819e-05	AW205632	---	---
AI637733	---	---		241509_at	-0.840361	2.52547	0.731664	1.00117	-1.15669	4.54707	70.6892	4.73658e-07	5.83925e-05	AI637733	---	---
NM_006295	valyl-tRNA synthetase	VARS	7407	201797_s_at	-1.16902	0.639512	-1.55399	0.400136	1.72509	7.96801	70.1056	4.91452e-07	5.99078e-05	NM_006295	valyl-tRNA synthetase	VARS	7407
NM_003158	aurora kinase A	AURKA	6790	208079_s_at	-2.41715	1.61625	-0.516025	2.14566	0.791976	9.10724	70.0711	4.92531e-07	5.99078e-05	NM_003158	aurora kinase A	AURKA	6790
AI636080	mucolipin 3	MCOLN3	55283	229797_at	-0.85755	1.82552	-0.422823	2.4032	-1.0712	4.74236	69.8295	5.00156e-07	6.05654e-05	AI636080	mucolipin 3	MCOLN3	55283
AW873348	quiescin Q6 sulfhydryl oxidase 2	QSOX2	169714	227146_at	-0.995023	0.513323	-1.16332	1.15029	0.832607	8.61662	69.365	5.1522e-07	6.19034e-05	AW873348	quiescin Q6 sulfhydryl oxidase 2	QSOX2	169714
AF274950	chromosome 12 open reading frame 11	C12orf11	55726	221652_s_at	-1.49169	1.07804	-1.96036	1.78954	1.24622	9.73468	69.3635	5.1527e-07	6.19034e-05	AF274950	chromosome 12 open reading frame 11	C12orf11	55726
BC002508	acetylserotonin O-methyltransferase-like	ASMTL	8623	209394_at	-0.468741	2.4344	-0.640762	1.6651	-1.02562	7.94937	69.1508	5.22355e-07	6.21426e-05	BC002508	acetylserotonin O-methyltransferase-like	ASMTL	8623
AA533080	---	---		232835_at	-0.330159	2.77505	0.787198	1.2881	-1.97839	7.56459	69.1501	5.22378e-07	6.21426e-05	AA533080	---	---
NM_012410	seizure related 6 homolog (mouse)-like 2	SEZ6L2	26470	218720_x_at	0.535312	1.58715	-0.33935	0.990155	-1.49823	6.70617	69.0814	5.24693e-07	6.21426e-05	NM_012410	seizure related 6 homolog (mouse)-like 2	SEZ6L2	26470
AB005289	ATP-binding cassette, sub-family B (MDR/TAP), member 7	ABCB7	22	209620_s_at	-1.32109	0.473755	-1.10023	1.8331	0.674585	8.42573	69.0517	5.25697e-07	6.21426e-05	AB005289	ATP-binding cassette, sub-family B (MDR/TAP), member 7	ABCB7	22
AI963203	solute carrier family 7 (cationic amino acid transporter, y+ system), member 3	SLC7A3	84889	230597_at	-2.1978	4.41709	-0.275929	3.60484	-1.49384	8.28262	68.8194	5.33631e-07	6.29287e-05	AI963203	solute carrier family 7 (cationic amino acid transporter, y+ system), member 3	SLC7A3	84889
NM_003384	vaccinia related kinase 1	VRK1	7443	203856_at	-2.67152	1.65641	-1.23752	1.66631	1.83352	8.05937	68.7701	5.35335e-07	6.29287e-05	NM_003384	vaccinia related kinase 1	VRK1	7443
NM_002349	lymphocyte antigen 75	LY75	4065	205668_at	-0.493944	1.71062	-0.735891	1.6878	-0.710869	4.28085	68.7565	5.35804e-07	6.29287e-05	NM_002349	lymphocyte antigen 75	LY75	4065
AL522406	chromosome 13 open reading frame 23	C13orf23	80209	225887_at	-2.14457	1.75315	-2.53835	2.8439	1.35649	7.67567	68.6955	5.37923e-07	6.3042e-05	AL522406	chromosome 13 open reading frame 23	C13orf23	80209
AI571166	---	---		226848_at	-1.78917	0.981682	-0.0754173	1.14407	0.74951	7.05453	68.4057	5.48128e-07	6.39635e-05	AI571166	---	---
AI825937	echinoderm microtubule associated protein like 1	EML1	2009	204796_at	-1.30898	0.96748	-1.11065	0.630026	1.3069	5.71847	68.3143	5.51395e-07	6.4071e-05	AI825937	echinoderm microtubule associated protein like 1	EML1	2009
AK024960	Spermatid perinuclear RNA binding protein	STRBP	55342	233251_at	-0.780821	1.53303	-0.607753	2.40762	-0.930099	4.56455	68.251	5.5367e-07	6.41987e-05	AK024960	Spermatid perinuclear RNA binding protein	STRBP	55342
AJ130971	small nuclear ribonucleoprotein polypeptide A'	SNRPA1	6627	215722_s_at	-1.01035	0.987426	-1.58723	1.19892	0.940087	8.21634	68.0841	5.59728e-07	6.45519e-05	AJ130971	small nuclear ribonucleoprotein polypeptide A'	SNRPA1	6627
BF591615	---	---		231502_at	-0.818026	2.02609	-0.900848	1.99043	-0.583724	4.33926	67.9531	5.64539e-07	6.48001e-05	BF591615	---	---
BF057073	---	---		231310_at	-2.1554	5.11101	0.954382	4.60485	-3.25443	8.14688	67.8712	5.67573e-07	6.4935e-05	BF057073	---	---
AU153330	activating signal cointegrator 1 complex subunit 3	ASCC3	10973	231269_at	-1.65292	2.79376	-2.11229	0.942221	1.50172	6.54632	67.8349	5.68921e-07	6.4935e-05	AU153330	activating signal cointegrator 1 complex subunit 3	ASCC3	10973
NM_024880	---	---		206548_at	-0.739845	3.49635	-0.0577098	1.3561	-1.2912	5.38912	67.8185	5.69532e-07	6.4935e-05	NM_024880	---	---
AI291720	DPH5 homolog (S. cerevisiae)	DPH5	51611	222360_at	-1.57242	1.7706	-1.30086	1.35886	0.94356	6.17503	67.7453	5.72274e-07	6.49818e-05	AI291720	DPH5 homolog (S. cerevisiae)	DPH5	51611
BE350312	---	---		242008_at	-1.47977	2.95081	-0.87513	3.1085	-0.992742	5.7288	67.744	5.72322e-07	6.49818e-05	BE350312	---	---
AI754871	spermatogenesis associated 5	SPATA5	166378	229075_at	-1.73817	1.83232	-1.7735	0.868605	1.73066	5.74511	67.6218	5.76932e-07	6.51099e-05	AI754871	spermatogenesis associated 5	SPATA5	166378
NM_006208	ectonucleotide pyrophosphatase/phosphodiesterase 1	ENPP1	5167	205066_s_at	-1.07921	3.34695	-0.449602	1.31859	-0.615762	7.01728	67.6193	5.77028e-07	6.51099e-05	NM_006208	ectonucleotide pyrophosphatase/phosphodiesterase 1	ENPP1	5167
AA934358	RNA binding motif protein 46	RBM46	166863	242516_x_at	-0.242789	3.88657	-0.487133	-0.346339	-0.497086	3.87018	67.5138	5.81042e-07	6.53541e-05	AA934358	RNA binding motif protein 46	RBM46	166863
AK094613	Ribosomal protein S24	RPS24	6229	1555878_at	-2.02238	2.85065	-2.0611	1.51701	1.43489	6.99757	67.3024	5.89195e-07	6.58031e-05	AK094613	Ribosomal protein S24	RPS24	6229
AL603301	MDN1, midasin homolog (yeast)	MDN1	23195	1569484_s_at	-1.59289	2.67733	-0.720286	2.28626	-0.343538	5.39671	67.0643	5.98542e-07	6.63633e-05	AL603301	MDN1, midasin homolog (yeast)	MDN1	23195
BC034978	phosphodiesterase 12	PDE12	201626	1554915_a_at	-1.34488	0.131906	-1.37415	0.625014	1.80033	5.05414	67.051	5.99071e-07	6.63633e-05	BC034978	phosphodiesterase 12	PDE12	201626
AU132789	zinc finger protein 273	ZNF273	10793	215239_x_at	-1.6595	1.78	-1.41399	2.27854	0.489802	6.11919	67.0164	6.00443e-07	6.63806e-05	AU132789	zinc finger protein 273	ZNF273	10793
BE219444	general transcription factor IIA, 2, 12kDa	GTF2A2	2958	243985_at	-0.779355	1.78412	-0.553318	1.52389	-0.462403	5.16726	66.9266	6.04032e-07	6.65223e-05	BE219444	general transcription factor IIA, 2, 12kDa	GTF2A2	2958
AW303539	Lyrm7 homolog (mouse)	LYRM7	90624	239960_x_at	-0.949875	0.914514	-1.12045	-0.779313	1.91154	5.16036	66.9234	6.04162e-07	6.65223e-05	AW303539	Lyrm7 homolog (mouse)	LYRM7	90624
AF193855	Zic family member 2 (odd-paired homolog, Drosophila)	ZIC2	7546	223642_at	-1.56201	2.45333	-1.63969	4.902	-1.43064	5.24596	66.7994	6.09158e-07	6.68031e-05	AF193855	Zic family member 2 (odd-paired homolog, Drosophila)	ZIC2	7546
NM_021242	MID1 interacting protein 1 (gastrulation specific G12 homolog (zebrafish))	MID1IP1	58526	218251_at	-1.13479	0.537875	-1.15093	0.869556	1.14308	7.41859	66.7624	6.10658e-07	6.68334e-05	NM_021242	MID1 interacting protein 1 (gastrulation specific G12 homolog (zebrafish))	MID1IP1	58526
BC016785	zinc finger protein 826, pseudogene	ZNF826P	664701	1569191_at	-0.706738	2.41267	-0.818	2.29592	-1.08277	4.4976	66.5915	6.17647e-07	6.74631e-05	BC016785	zinc finger protein 826, pseudogene	ZNF826P	664701
AI950472	---	---		237275_at	-0.638617	4.5755	-0.529861	1.41895	-1.47928	5.6787	66.5148	6.20814e-07	6.76737e-05	AI950472	---	---
NM_020990	creatine kinase, mitochondrial 1A /// creatine kinase, mitochondrial 1B	CKMT1A /// CKMT1B		202712_s_at	-0.738099	2.64586	-0.150297	2.14519	-1.47379	5.95383	66.3988	6.25647e-07	6.79293e-05	NM_020990	creatine kinase, mitochondrial 1A /// creatine kinase, mitochondrial 1B	CKMT1A /// CKMT1B
AI081356	LAG1 homolog, ceramide synthase 6	LASS6	253782	235463_s_at	-1.00556	0.737975	-1.23414	0.230976	1.42834	6.04103	66.3438	6.27952e-07	6.80047e-05	AI081356	LAG1 homolog, ceramide synthase 6	LASS6	253782
AA001400	frizzled homolog 3 (Drosophila)	FZD3	7976	227499_at	-1.113	1.38639	-0.901321	1.81007	0.0450416	6.22701	66.2845	6.30453e-07	6.80453e-05	AA001400	frizzled homolog 3 (Drosophila)	FZD3	7976
BF540749	transmembrane 7 superfamily member 3	TM7SF3	51768	226478_at	-1.74669	0.879768	-2.33097	2.32711	1.456	7.05564	66.0827	6.39041e-07	6.86946e-05	BF540749	transmembrane 7 superfamily member 3	TM7SF3	51768
AI967971	polyribonucleotide nucleotidyltransferase 1	PNPT1	87178	225291_at	-2.22274	1.30418	-1.69922	1.51974	1.90767	8.6936	66.0548	6.40243e-07	6.86946e-05	AI967971	polyribonucleotide nucleotidyltransferase 1	PNPT1	87178
AI867102	nucleoporin 210kDa	NUP210	23225	213947_s_at	-1.88047	0.52448	-0.96301	1.40774	1.40915	8.15341	66.0231	6.4161e-07	6.87063e-05	AI867102	nucleoporin 210kDa	NUP210	23225
NM_006773	DEAD (Asp-Glu-Ala-Asp) box polypeptide 18	DDX18	8886	205763_s_at	-0.886176	1.10615	-2.17488	1.25468	1.13093	7.4894	65.7461	6.53692e-07	6.97024e-05	NM_006773	DEAD (Asp-Glu-Ala-Asp) box polypeptide 18	DDX18	8886
AW195586	ADAM metallopeptidase domain 1, pseudogene	ADAM1	8759	228925_at	-1.78469	2.30956	-1.3274	1.38358	0.977386	5.61986	65.6498	6.57961e-07	6.9823e-05	AW195586	ADAM metallopeptidase domain 1, pseudogene	ADAM1	8759
NM_018119	polymerase (RNA) III (DNA directed) polypeptide E (80kD)	POLR3E	55718	218016_s_at	-1.58816	0.664917	-1.29545	1.61895	1.15085	8.29393	65.415	6.68506e-07	7.06173e-05	NM_018119	polymerase (RNA) III (DNA directed) polypeptide E (80kD)	POLR3E	55718
BC041466	---	---		1564154_at	-0.364406	1.8904	-0.431515	2.48966	-1.63783	6.59976	65.323	6.72696e-07	7.07883e-05	BC041466	---	---
NM_004929	calbindin 1, 28kDa	CALB1	793	205626_s_at	-0.399996	4.42103	0.307138	-0.446582	-0.980719	4.50091	65.1783	6.79347e-07	7.1071e-05	NM_004929	calbindin 1, 28kDa	CALB1	793
NM_004543	nebulin	NEB	4703	205054_at	-0.260658	3.52854	-0.467429	-0.5346	-0.247504	4.82863	65.151	6.8061e-07	7.1071e-05	NM_004543	nebulin	NEB	4703
AU144571	RNA binding motif protein 26	RBM26	64062	229433_at	-0.561364	0.423489	-1.62852	0.975209	0.855743	6.27154	65.094	6.8326e-07	7.1076e-05	AU144571	RNA binding motif protein 26	RBM26	64062
NM_020143	partner of NOB1 homolog (S. cerevisiae)	PNO1	56902	203622_s_at	-1.36663	0.115837	-1.88163	0.907945	1.97714	8.14446	65.0554	6.8506e-07	7.10993e-05	NM_020143	partner of NOB1 homolog (S. cerevisiae)	PNO1	56902
BC005954	NADH dehydrogenase (ubiquinone) Fe-S protein 7, 20kDa (NADH-coenzyme Q reductase)	NDUFS7	374291	211752_s_at	-0.376352	-0.48213	-1.63372	0.952204	0.991409	9.25006	64.8137	6.96465e-07	7.19018e-05	BC005954	NADH dehydrogenase (ubiquinone) Fe-S protein 7, 20kDa (NADH-coenzyme Q reductase)	NDUFS7	374291
AI743596	tetraspanin 2	TSPAN2	10100	227236_at	-0.251148	2.55369	-0.487084	1.80133	-1.47624	5.38742	64.6852	7.02624e-07	7.22644e-05	AI743596	tetraspanin 2	TSPAN2	10100
NM_021614	potassium intermediate/small conductance calcium-activated channel, subfamily N, member 2	KCNN2	3781	220116_at	-0.958815	3.04339	-0.403656	1.93065	-1.07364	5.34687	64.4507	7.14039e-07	7.25831e-05	NM_021614	potassium intermediate/small conductance calcium-activated channel, subfamily N, member 2	KCNN2	3781
NM_001963	epidermal growth factor	EGF	1950	206254_at	-0.556938	0.927211	-1.03335	2.47846	-0.715535	4.90258	64.3902	7.17019e-07	7.25831e-05	NM_001963	epidermal growth factor	EGF	1950
AA404996	---	---		244633_at	-0.625832	2.29313	-0.435352	1.54702	-0.879657	5.90873	64.3439	7.19306e-07	7.25831e-05	AA404996	---	---
NM_018126	transmembrane protein 33	TMEM33	55161	218465_at	-1.46411	1.48913	-1.85933	0.474097	1.89122	7.57535	64.2963	7.21671e-07	7.25831e-05	NM_018126	transmembrane protein 33	TMEM33	55161
NM_001643	apolipoprotein A-II	APOA2	336	219466_s_at	-0.196197	3.26372	-0.329568	-0.439265	-0.379155	4.44473	64.256	7.23682e-07	7.26516e-05	NM_001643	apolipoprotein A-II	APOA2	336
BC030211	---	---		1568780_at	-1.85896	3.63172	-1.15784	2.73911	-0.405792	6.72295	64.2086	7.26053e-07	7.27558e-05	BC030211	---	---
AI457120	phosphoribosyl pyrophosphate amidotransferase	PPAT	5471	209433_s_at	-2.03691	1.61329	-1.23062	1.69307	1.19085	8.83763	64.1355	7.29734e-07	7.28294e-05	AI457120	phosphoribosyl pyrophosphate amidotransferase	PPAT	5471
BF511884	---	---		241776_at	-0.936591	3.0463	-0.556269	2.04347	-1.07031	5.31987	64.1293	7.30042e-07	7.28294e-05	BF511884	---	---
AL044326	phosphoribosylformylglycinamidine synthase	PFAS	5198	213302_at	-2.78312	1.77757	-0.824935	0.76459	2.23082	8.19102	64.1146	7.30788e-07	7.28294e-05	AL044326	phosphoribosylformylglycinamidine synthase	PFAS	5198
AA020920	testis expressed 9	TEX9	374618	243198_at	-1.05985	0.422817	-1.06661	-0.778072	2.1487	5.20172	63.6441	7.5505e-07	7.47021e-05	AA020920	testis expressed 9	TEX9	374618
AB023420	heat shock 70kDa protein 4	HSPA4	3308	208815_x_at	-1.26126	1.41217	-1.04911	1.09384	0.760713	9.71128	63.4781	7.63842e-07	7.50359e-05	AB023420	heat shock 70kDa protein 4	HSPA4	3308
N51263	alkaline ceramidase 3	ACER3	55331	222689_at	-1.22859	0.653976	-1.16523	0.550319	1.42054	6.07656	63.4766	7.6392e-07	7.50359e-05	N51263	alkaline ceramidase 3	ACER3	55331
AW138134	PHD finger protein 17	PHF17	79960	225816_at	-1.8944	2.59757	-1.293	2.29781	0.358674	8.13861	63.2904	7.73936e-07	7.57472e-05	AW138134	PHD finger protein 17	PHF17	79960
BC006164	---	---		211781_x_at	-0.698837	3.80802	-0.581065	1.8708	-1.43032	6.48133	63.2117	7.78216e-07	7.58941e-05	BC006164	---	---
BC005004	family with sequence similarity 64, member A	FAM64A	54478	221591_s_at	-1.26801	1.48367	-1.02182	1.39108	0.527286	8.17041	63.158	7.81153e-07	7.60448e-05	BC005004	family with sequence similarity 64, member A	FAM64A	54478
AA074145	proline dehydrogenase (oxidase) 1	PRODH	5625	214203_s_at	-0.266674	2.95954	-0.63883	1.4574	-1.26556	7.75738	63.1273	7.82835e-07	7.60729e-05	AA074145	proline dehydrogenase (oxidase) 1	PRODH	5625
BC003573	farnesyl-diphosphate farnesyltransferase 1	FDFT1	2222	210950_s_at	-0.883695	-0.175896	-2.38525	2.2967	1.00136	10.0792	63.0813	7.85368e-07	7.61835e-05	BC003573	farnesyl-diphosphate farnesyltransferase 1	FDFT1	2222
NM_031217	kinesin family member 18A	KIF18A	81930	221258_s_at	-1.22004	0.584408	-1.86349	1.52436	1.25133	6.37247	62.9736	7.91342e-07	7.66268e-05	NM_031217	kinesin family member 18A	KIF18A	81930
AK093253	FLJ35934	FLJ35934	400579	1564383_s_at	-0.608198	1.35596	-0.00784414	2.33717	-1.39667	5.85539	62.9401	7.93209e-07	7.66717e-05	AK093253	FLJ35934	FLJ35934	400579
AI339426	small nucleolar RNA host gene 12 (non-protein coding)	SNHG12	85028	228990_at	-1.31923	0.954346	-2.12006	1.6764	1.29689	7.12654	62.774	8.02548e-07	7.68634e-05	AI339426	small nucleolar RNA host gene 12 (non-protein coding)	SNHG12	85028
NM_017817	RAB20, member RAS oncogene family	RAB20	55647	219622_at	1.07717	1.3777	-0.156653	-0.280115	-1.24523	7.87141	62.7402	8.04467e-07	7.68634e-05	NM_017817	RAB20, member RAS oncogene family	RAB20	55647
BC005107	chromosome 21 open reading frame 105	C21orf105	90625	232191_at	-0.38612	4.05705	0.11329	-0.391413	-0.780814	5.58915	62.6807	8.07859e-07	7.68634e-05	BC005107	chromosome 21 open reading frame 105	C21orf105	90625
NM_020436	sal-like 4 (Drosophila)	SALL4	57167	229661_at	-1.06529	4.06169	-0.0908849	2.65741	-1.99963	7.83015	62.388	8.24788e-07	7.79297e-05	NM_020436	sal-like 4 (Drosophila)	SALL4	57167
AI743740	La ribonucleoprotein domain family, member 4	LARP4	113251	214155_s_at	-2.13699	1.7881	-1.46261	1.38723	1.59121	5.90417	62.3864	8.24882e-07	7.79297e-05	AI743740	La ribonucleoprotein domain family, member 4	LARP4	113251
NM_022346	non-SMC condensin I complex, subunit G	NCAPG	64151	218662_s_at	-2.73593	0.978664	-0.522732	2.2772	1.24006	8.16915	62.3639	8.262e-07	7.79297e-05	NM_022346	non-SMC condensin I complex, subunit G	NCAPG	64151
Y15521	acetylserotonin O-methyltransferase-like	ASMTL	8623	36554_at	-0.446312	2.47154	-1.69688	2.22088	-0.726867	7.75159	62.2524	8.32777e-07	7.81055e-05	Y15521	acetylserotonin O-methyltransferase-like	ASMTL	8623
NM_022096	ankyrin repeat domain 5	ANKRD5	63926	220144_s_at	-0.682479	1.98818	-0.569142	1.00971	-0.27396	5.46008	62.2042	8.35637e-07	7.81055e-05	NM_022096	ankyrin repeat domain 5	ANKRD5	63926
AU145049	huntingtin interacting protein 1	HIP1	3092	226364_at	-1.23063	1.72881	-1.25353	2.03911	0.130639	7.60033	62.1606	8.38237e-07	7.81055e-05	AU145049	huntingtin interacting protein 1	HIP1	3092
NM_001813	centromere protein E, 312kDa	CENPE	1062	205046_at	-1.69293	1.10139	-1.4988	1.46925	1.3455	7.54263	62.1566	8.38478e-07	7.81055e-05	NM_001813	centromere protein E, 312kDa	CENPE	1062
AV699857	ribulose-5-phosphate-3-epimerase	RPE	6120	225039_at	-0.90565	0.608227	-2.00054	1.35765	1.1315	7.8104	62.1482	8.38979e-07	7.81055e-05	AV699857	ribulose-5-phosphate-3-epimerase	RPE	6120
NM_004728	DEAD (Asp-Glu-Ala-Asp) box polypeptide 21	DDX21	9188	208152_s_at	-1.17836	1.64118	-1.76636	0.5585	1.43654	10.3621	62.1411	8.39404e-07	7.81055e-05	NM_004728	DEAD (Asp-Glu-Ala-Asp) box polypeptide 21	DDX21	9188
M65254	protein phosphatase 2, regulatory subunit A, beta	PPP2R1B	5519	202886_s_at	-0.729823	0.166113	-1.07711	-0.0219559	1.40717	6.24981	62.082	8.42948e-07	7.81055e-05	M65254	protein phosphatase 2, regulatory subunit A, beta	PPP2R1B	5519
AW193600	hypothetical LOC439949	LOC439949	439949	232001_at	-1.30704	2.37894	-0.9357	0.992449	0.476228	6.58019	62.0736	8.43454e-07	7.81055e-05	AW193600	hypothetical LOC439949	LOC439949	439949
NM_017412	frizzled homolog 3 (Drosophila)	FZD3	7976	219683_at	-1.10562	0.599286	-1.41628	1.45113	0.882624	6.30143	61.9957	8.48157e-07	7.8367e-05	NM_017412	frizzled homolog 3 (Drosophila)	FZD3	7976
U21915	general transcription factor IIH, polypeptide 2B	GTF2H2B	653238	215470_at	-1.40956	0.381828	-1.18646	1.89159	0.812197	6.53187	61.9737	8.49491e-07	7.8367e-05	U21915	general transcription factor IIH, polypeptide 2B	GTF2H2B	653238
NM_004446	glutamyl-prolyl-tRNA synthetase	EPRS	2058	200843_s_at	-0.993733	0.740253	-1.40388	1.53154	0.661873	9.84291	61.8463	8.57269e-07	7.8947e-05	NM_004446	glutamyl-prolyl-tRNA synthetase	EPRS	2058
AI144007	heterogeneous nuclear ribonucleoprotein A1 /// hypothetical LOC100506653	HNRNPA1 /// LOC100506653		222040_at	-1.60492	0.612569	-0.43482	2.28819	0.165151	7.53009	61.807	8.59688e-07	7.8947e-05	AI144007	heterogeneous nuclear ribonucleoprotein A1 /// hypothetical LOC100506653	HNRNPA1 /// LOC100506653
AB011100	KIAA0528	KIAA0528	9847	212943_at	-1.76685	0.758251	-0.426031	2.1219	0.383525	9.35137	61.8001	8.60115e-07	7.8947e-05	AB011100	KIAA0528	KIAA0528	9847
AK057473	Hypothetical protein LOC339260	LOC339260	339260	1564359_a_at	-0.337655	3.14406	-0.229992	-0.52603	-0.206349	3.71931	61.7429	8.63647e-07	7.90398e-05	AK057473	Hypothetical protein LOC339260	LOC339260	339260
AW006938	neurolysin (metallopeptidase M3 family)	NLN	57486	225944_at	-1.63567	2.69468	-1.40867	0.90884	1.07067	6.81455	61.6387	8.7013e-07	7.94655e-05	AW006938	neurolysin (metallopeptidase M3 family)	NLN	57486
AI808395	NADH dehydrogenase (ubiquinone) Fe-S protein 1, 75kDa (NADH-coenzyme Q reductase)	NDUFS1	4719	236356_at	-1.52743	0.937391	-1.22863	0.565798	1.65685	6.26038	61.4716	8.8065e-07	8.02099e-05	AI808395	NADH dehydrogenase (ubiquinone) Fe-S protein 1, 75kDa (NADH-coenzyme Q reductase)	NDUFS1	4719
AK022853	solute carrier family 6 (neutral amino acid transporter), member 15	SLC6A15	55117	232263_at	-1.64681	1.20404	-1.5198	1.21627	1.44782	6.24458	61.3889	8.85919e-07	8.03699e-05	AK022853	solute carrier family 6 (neutral amino acid transporter), member 15	SLC6A15	55117
AI014470	hypothetical LOC728485	LOC728485	728485	242070_at	-0.871923	1.24931	-0.209388	2.31277	-0.946767	5.84668	61.1879	8.98873e-07	8.13259e-05	AI014470	hypothetical LOC728485	LOC728485	728485
NM_004280	eukaryotic translation elongation factor 1 epsilon 1	EEF1E1	9521	204905_s_at	-1.37768	0.74161	-2.17999	1.32467	1.70068	8.6697	61.1518	9.01229e-07	8.13259e-05	NM_004280	eukaryotic translation elongation factor 1 epsilon 1	EEF1E1	9521
AK022964	HAUS augmin-like complex, subunit 6	HAUS6	54801	233655_s_at	-1.65726	0.387397	-1.78608	2.14923	1.28603	5.87425	61.1121	9.03823e-07	8.13259e-05	AK022964	HAUS augmin-like complex, subunit 6	HAUS6	54801
AI347136	telomeric repeat binding factor (NIMA-interacting) 1	TERF1	7013	203448_s_at	-2.08555	3.79579	-0.439345	1.59898	0.0472003	8.89054	61.1109	9.03903e-07	8.13259e-05	AI347136	telomeric repeat binding factor (NIMA-interacting) 1	TERF1	7013
BF223023	hypothetical LOC790952	ESRG	790952	231381_at	-2.19643	5.62383	1.46634	4.82711	-3.87381	7.90733	61.0305	9.09185e-07	8.14371e-05	BF223023	hypothetical LOC790952	ESRG	790952
BG500611	Yip1 domain family, member 6	YIPF6	286451	212342_at	-0.712073	-0.115937	-1.68649	1.37671	0.957239	6.82454	61.005	9.10867e-07	8.14371e-05	BG500611	Yip1 domain family, member 6	YIPF6	286451
BF214329	mitochondrial fission regulator 1	MTFR1	9650	203207_s_at	-1.37851	0.607247	-1.98952	1.62359	1.42005	7.00461	61.0014	9.11103e-07	8.14371e-05	BF214329	mitochondrial fission regulator 1	MTFR1	9650
M33653	collagen, type XIII, alpha 1	COL13A1	1305	211343_s_at	0.413132	2.213	0.0327796	1.78525	-2.36282	6.55057	60.9118	9.17055e-07	8.18352e-05	M33653	collagen, type XIII, alpha 1	COL13A1	1305
NM_018846	kelch-like 7 (Drosophila)	KLHL7	55975	220238_s_at	-1.7115	1.17465	-2.336	2.71602	1.06661	5.84436	60.837	9.22053e-07	8.2147e-05	NM_018846	kelch-like 7 (Drosophila)	KLHL7	55975
U77949	cell division cycle 6 homolog (S. cerevisiae)	CDC6	990	203967_at	-1.86283	0.715046	-1.78036	1.59115	1.75062	5.89103	60.7159	9.30221e-07	8.26977e-05	U77949	cell division cycle 6 homolog (S. cerevisiae)	CDC6	990
W92748	sema domain, transmembrane domain (TM), and cytoplasmic domain, (semaphorin) 6A	SEMA6A	57556	225660_at	-1.63628	3.67148	0.312445	2.24142	-1.29012	8.98583	60.6783	9.32777e-07	8.26977e-05	W92748	sema domain, transmembrane domain (TM), and cytoplasmic domain, (semaphorin) 6A	SEMA6A	57556
AA732995	---	---		216000_at	-0.459358	1.85433	-0.486849	1.51926	-0.847023	4.95271	60.6081	9.37563e-07	8.28529e-05	AA732995	---	---
BC012484	GRB10 interacting GYF protein 2	GIGYF2	26058	1560133_at	-0.72611	1.61775	-0.544183	1.75451	-0.620022	4.04871	60.5741	9.39898e-07	8.29251e-05	BC012484	GRB10 interacting GYF protein 2	GIGYF2	26058
NM_024622	FAST kinase domains 1	FASTKD1	79675	219002_at	-1.98501	1.38857	-0.405719	1.76	0.619301	8.83394	60.3164	9.578e-07	8.40724e-05	NM_024622	FAST kinase domains 1	FASTKD1	79675
BC001811	RRS1 ribosome biogenesis regulator homolog (S. cerevisiae)	RRS1	23212	209567_at	-1.99456	0.840088	-0.782375	1.08043	1.51582	8.73346	60.3148	9.57906e-07	8.40724e-05	BC001811	RRS1 ribosome biogenesis regulator homolog (S. cerevisiae)	RRS1	23212
N22849	---	---		230300_at	-1.19341	0.610679	-0.870564	0.123509	1.48788	5.35238	60.2985	9.59059e-07	8.40724e-05	N22849	---	---
AA521262	chromosome 3 open reading frame 67	C3orf67	200844	239697_x_at	-0.577495	0.930876	-0.368948	2.19101	-0.947508	4.70138	60.2489	9.62557e-07	8.42438e-05	AA521262	chromosome 3 open reading frame 67	C3orf67	200844
NM_024745	SHC SH2-domain binding protein 1	SHCBP1	79801	219493_at	-1.79602	0.768109	-1.70049	1.19279	1.87845	6.33872	60.1609	9.68799e-07	8.45387e-05	NM_024745	SHC SH2-domain binding protein 1	SHCBP1	79801
NM_018183	strawberry notch homolog 1 (Drosophila)	SBNO1	55206	218737_at	-1.16223	0.429809	-1.63527	1.65792	1.00385	6.50115	60.1578	9.69023e-07	8.45387e-05	NM_018183	strawberry notch homolog 1 (Drosophila)	SBNO1	55206
T79568	regulation of nuclear pre-mRNA domain containing 1A	RPRD1A	55197	222558_at	-0.918381	0.00562418	-2.36828	1.15958	1.72231	6.22349	60.0691	9.75367e-07	8.47896e-05	T79568	regulation of nuclear pre-mRNA domain containing 1A	RPRD1A	55197
AA757900	Farnesyl-diphosphate farnesyltransferase 1	FDFT1	2222	241954_at	-1.26936	2.49731	-0.748881	2.20357	-0.532867	6.48105	60.028	9.78322e-07	8.47896e-05	AA757900	Farnesyl-diphosphate farnesyltransferase 1	FDFT1	2222
AA524609	---	---		1559410_at	-1.15338	3.79145	0.0752127	2.13257	-1.58229	5.46662	60.0088	9.79706e-07	8.47896e-05	AA524609	---	---
AK000776	receptor tyrosine kinase-like orphan receptor 1	ROR1	4919	232060_at	-1.15914	2.1366	0.0795199	3.08883	-1.66529	5.48549	59.9671	9.82727e-07	8.47896e-05	AK000776	receptor tyrosine kinase-like orphan receptor 1	ROR1	4919
AI082827	guanine nucleotide binding protein (G protein), alpha activating activity polypeptide, olfactory type	GNAL	2774	214071_at	-1.0929	1.36528	-0.98094	2.80692	-0.579518	4.91033	59.9666	9.82767e-07	8.47896e-05	AI082827	guanine nucleotide binding protein (G protein), alpha activating activity polypeptide, olfactory type	GNAL	2774
NM_004692	internexin neuronal intermediate filament protein, alpha	INA	9118	204465_s_at	-0.462762	2.4043	-0.626378	2.30772	-1.45957	6.95506	59.8574	9.90719e-07	8.5262e-05	NM_004692	internexin neuronal intermediate filament protein, alpha	INA	9118
AK001419	feline leukemia virus subgroup C cellular receptor 1	FLVCR1	28982	222906_at	-2.44286	2.87218	-1.27882	1.95542	1.0344	7.46168	59.8439	9.91705e-07	8.5262e-05	AK001419	feline leukemia virus subgroup C cellular receptor 1	FLVCR1	28982
AA017721	fucosyltransferase 9 (alpha (1,3) fucosyltransferase)	FUT9	10690	214046_at	-1.58219	0.180842	-1.80786	0.363808	2.48461	5.67703	59.8077	9.94364e-07	8.5262e-05	AA017721	fucosyltransferase 9 (alpha (1,3) fucosyltransferase)	FUT9	10690
NM_014393	staufen, RNA binding protein, homolog 2 (Drosophila)	STAU2	27067	204226_at	-1.31231	-0.0880856	-1.35813	0.674856	1.79719	7.33449	59.7851	9.96032e-07	8.5262e-05	NM_014393	staufen, RNA binding protein, homolog 2 (Drosophila)	STAU2	27067
AU148611	---	---		215594_at	-0.451672	1.59048	-0.771123	2.32773	-1.11623	5.53539	59.7463	9.98897e-07	8.5262e-05	AU148611	---	---
NM_017775	tetratricopeptide repeat domain 19	TTC19	54902	217964_at	-1.17768	0.85697	-1.29873	1.22508	0.941123	9.66354	59.7426	9.9917e-07	8.5262e-05	NM_017775	tetratricopeptide repeat domain 19	TTC19	54902
AW024563	gem (nuclear organelle) associated protein 5	GEMIN5	25929	225712_at	-1.03175	0.70967	-1.84978	0.438915	1.73577	7.94683	59.6742	1.00424e-06	8.55609e-05	AW024563	gem (nuclear organelle) associated protein 5	GEMIN5	25929
AW025023	ribosomal protein S6 kinase, 90kDa, polypeptide 6	RPS6KA6	27330	228503_at	-0.925328	0.195805	-1.39199	1.00226	1.11988	6.13944	59.6286	1.00765e-06	8.57173e-05	AW025023	ribosomal protein S6 kinase, 90kDa, polypeptide 6	RPS6KA6	27330
AA927701	heat shock 70kDa protein 9 (mortalin)	HSPA9	3313	200690_at	-1.46126	0.473544	-0.938042	1.27837	1.07652	7.77311	59.5776	1.01146e-06	8.57749e-05	AA927701	heat shock 70kDa protein 9 (mortalin)	HSPA9	3313
BE644666	---	---		243275_at	-0.560887	3.01751	-0.401321	1.03293	-0.866022	4.62354	59.5397	1.01432e-06	8.58835e-05	BE644666	---	---
BF447901	SH3-binding domain kinase 1	SBK1	388228	226549_at	-0.92041	1.55113	0.129965	1.18499	-0.473272	7.23702	59.451	1.02102e-06	8.63175e-05	BF447901	SH3-binding domain kinase 1	SBK1	388228
BE886288	---	---		241687_at	-1.04234	0.491736	-0.811075	1.60423	0.349662	6.24501	59.4046	1.02456e-06	8.63864e-05	BE886288	---	---
BE256479	heat shock 60kDa protein 1 (chaperonin)	HSPD1	3329	200806_s_at	-1.57589	-0.0557541	-3.03116	2.17086	2.168	10.4222	59.3747	1.02684e-06	8.63864e-05	BE256479	heat shock 60kDa protein 1 (chaperonin)	HSPD1	3329
NM_020156	core 1 synthase, glycoprotein-N-acetylgalactosamine 3-beta-galactosyltransferase, 1	C1GALT1	56913	219439_at	-1.77941	1.05227	-1.62618	1.88414	1.25668	7.94352	59.3571	1.02818e-06	8.63864e-05	NM_020156	core 1 synthase, glycoprotein-N-acetylgalactosamine 3-beta-galactosyltransferase, 1	C1GALT1	56913
NM_017835	chromosome 21 open reading frame 59	C21orf59	56683	218123_at	-1.21072	0.175406	-1.13206	1.45873	0.934475	8.98894	59.3416	1.02938e-06	8.63864e-05	NM_017835	chromosome 21 open reading frame 59	C21orf59	56683
BQ219651	---	---		1558078_at	-0.896922	1.52714	-1.09023	1.10879	0.375502	5.91123	59.3101	1.0318e-06	8.63864e-05	BQ219651	---	---
AK025416	UDP-glucose glycoprotein glucosyltransferase 1	UGGT1	56886	231968_at	-1.32749	1.14576	-0.71215	0.764082	0.910945	8.80495	59.3098	1.03182e-06	8.63864e-05	AK025416	UDP-glucose glycoprotein glucosyltransferase 1	UGGT1	56886
AK021556	---	---		232796_at	-0.930811	1.79516	-0.766901	1.5196	-0.169379	6.00668	59.2898	1.03336e-06	8.63864e-05	AK021556	---	---
AF152308	protocadherin alpha 1 /// protocadherin alpha 10 /// protocadherin alpha 11 /// protocadherin alpha 12 /// protocadherin alpha 13 /// protocadherin alpha 2 /// protocadherin alpha 3 /// protocadherin alpha 4 /// protocadherin alpha 5 /// protocadherin alpha 6 /// protocadherin alpha 7 /// protocadherin alpha 8 /// protocadherin alpha 9 /// protocadherin alpha subfamily C, 1 /// protocadherin alph…	PCDHA1 /// PCDHA10 /// PCDHA11 /// PCDHA12 /// PCDHA13 /// PCDHA2 /// PCDHA3 /// PCDHA4 /// PCDHA5 /// PCDHA6 /// PCDHA7 /// PCDHA8 /// PCDHA9 /// PCDHAC1 /// PCDHAC2		210674_s_at	-0.651634	2.60714	-0.812644	2.09056	-1.06936	4.92178	58.9193	1.0624e-06	8.80813e-05	AF152308	protocadherin alpha 1 /// protocadherin alpha 10 /// protocadherin alpha 11 /// protocadherin alpha 12 /// protocadherin alpha 13 /// protocadherin alpha 2 /// protocadherin alpha 3 /// protocadherin alpha 4 /// protocadherin alpha 5 /// protocadherin alpha 6 /// protocadherin alpha 7 /// protocadherin alpha 8 /// protocadherin alpha 9 /// protocadherin alpha subfamily C, 1 /// protocadherin alph…	PCDHA1 /// PCDHA10 /// PCDHA11 /// PCDHA12 /// PCDHA13 /// PCDHA2 /// PCDHA3 /// PCDHA4 /// PCDHA5 /// PCDHA6 /// PCDHA7 /// PCDHA8 /// PCDHA9 /// PCDHAC1 /// PCDHAC2
AK023134	tudor domain containing 12	TDRD12	91646	215356_at	-0.767804	1.82762	-0.431663	3.59355	-1.94933	7.00037	58.8545	1.06758e-06	8.81667e-05	AK023134	tudor domain containing 12	TDRD12	91646
BE972639	---	---		243332_at	-0.938844	2.86066	-0.511281	1.17064	-0.454282	5.56383	58.8511	1.06785e-06	8.81667e-05	BE972639	---	---
AW205919	Platelet-derived growth factor alpha polypeptide	PDGFA	5154	229830_at	-0.934752	3.13202	0.375515	3.08626	-2.41711	6.21172	58.8402	1.06873e-06	8.81667e-05	AW205919	Platelet-derived growth factor alpha polypeptide	PDGFA	5154
NM_005998	chaperonin containing TCP1, subunit 3 (gamma)	CCT3	7203	200910_at	-1.54543	0.772365	-0.963125	0.95662	1.29231	11.0828	58.6722	1.08232e-06	8.88706e-05	NM_005998	chaperonin containing TCP1, subunit 3 (gamma)	CCT3	7203
NM_024674	lin-28 homolog A (C. elegans)	LIN28A	79727	219823_at	-2.07915	5.37482	0.457485	5.40535	-3.62101	7.11576	58.6658	1.08284e-06	8.88706e-05	NM_024674	lin-28 homolog A (C. elegans)	LIN28A	79727
AI017564	WD repeat domain 67	WDR67	93594	214061_at	-1.58305	1.56351	-1.03883	1.48998	0.76111	6.4189	58.638	1.08511e-06	8.88706e-05	AI017564	WD repeat domain 67	WDR67	93594
AI625022	family with sequence similarity 119, member A	FAM119A	151194	235177_at	-2.39	1.48263	-1.49189	1.56694	1.84576	7.52006	58.62	1.08659e-06	8.88706e-05	AI625022	family with sequence similarity 119, member A	FAM119A	151194
H10661	HIG1 hypoxia inducible domain family, member 1A	HIGD1A	25994	242317_at	-1.16736	0.423264	-1.80236	1.00798	1.55586	6.03079	58.6106	1.08735e-06	8.88706e-05	H10661	HIG1 hypoxia inducible domain family, member 1A	HIGD1A	25994
AI888657	TTC28 antisense RNA (non-protein coding)	TTC28-AS	284900	244189_at	-1.438	1.06027	-1.35878	1.5797	0.937295	6.8037	58.5948	1.08865e-06	8.88706e-05	AI888657	TTC28 antisense RNA (non-protein coding)	TTC28-AS	284900
NM_018123	asp (abnormal spindle) homolog, microcephaly associated (Drosophila)	ASPM	259266	219918_s_at	-2.3105	1.58148	-1.70118	2.22994	1.43084	8.08271	58.5403	1.09314e-06	8.9104e-05	NM_018123	asp (abnormal spindle) homolog, microcephaly associated (Drosophila)	ASPM	259266
AI224977	chromosome 12 open reading frame 48	C12orf48	55010	227928_at	-1.76809	1.20572	-1.69817	1.54337	1.46939	5.80908	58.4758	1.09848e-06	8.9302e-05	AI224977	chromosome 12 open reading frame 48	C12orf48	55010
AA587884	6-phosphofructo-2-kinase/fructose-2,6-biphosphatase 2	PFKFB2	5208	226733_at	-1.22836	1.65176	-0.869915	2.68442	-0.531903	6.20379	58.4497	1.10065e-06	8.9302e-05	AA587884	6-phosphofructo-2-kinase/fructose-2,6-biphosphatase 2	PFKFB2	5208
BE466578	---	---		237203_at	-0.301518	3.45582	-0.612397	0.317362	-0.653732	5.00612	58.4136	1.10366e-06	8.9302e-05	BE466578	---	---
N50034	myelin expression factor 2	MYEF2	50804	229464_at	-2.18171	0.65557	-1.12409	2.05371	1.34344	7.28149	58.4125	1.10375e-06	8.9302e-05	N50034	myelin expression factor 2	MYEF2	50804
AF139625	centromere protein J	CENPJ	55835	223513_at	-2.55352	0.493535	-1.45411	0.940352	2.73152	8.02576	58.3814	1.10635e-06	8.93805e-05	AF139625	centromere protein J	CENPJ	55835
NM_013976	glutaryl-CoA dehydrogenase	GCDH	2639	208369_s_at	-1.40706	0.126901	-1.34768	0.934513	1.6402	6.69626	58.3101	1.11234e-06	8.94789e-05	NM_013976	glutaryl-CoA dehydrogenase	GCDH	2639
AU154086	F-box protein 28	FBXO28	23219	1555971_s_at	-1.02051	1.71632	-1.76649	1.61111	0.551989	7.89161	58.2932	1.11376e-06	8.94789e-05	AU154086	F-box protein 28	FBXO28	23219
BC036012	tripartite motif-containing 37	TRIM37	4591	1554001_at	-1.02842	1.95806	-0.490901	0.935238	0.0795113	5.46635	58.258	1.11674e-06	8.94789e-05	BC036012	tripartite motif-containing 37	TRIM37	4591
AA526584	G protein-coupled receptor 176	GPR176	11245	227846_at	1.06032	2.33744	-0.203524	-0.251215	-1.53631	7.56434	58.2549	1.11701e-06	8.94789e-05	AA526584	G protein-coupled receptor 176	GPR176	11245
AV723167	synaptotagmin I	SYT1	6857	203998_s_at	-1.6434	0.982064	-1.53642	-0.0430092	2.369	5.78403	58.2468	1.11769e-06	8.94789e-05	AV723167	synaptotagmin I	SYT1	6857
BE468066	rhabdomyosarcoma 2 associated transcript (non-protein coding)	RMST	196475	229782_at	-1.3992	4.14791	0.291063	3.62768	-2.59593	6.39031	58.1554	1.12548e-06	8.94789e-05	BE468066	rhabdomyosarcoma 2 associated transcript (non-protein coding)	RMST	196475
BG104571	transmembrane 9 superfamily member 3	TM9SF3	56889	222399_s_at	-0.109012	-0.0864085	-2.0072	0.0157725	1.46543	9.65047	58.1519	1.12577e-06	8.94789e-05	BG104571	transmembrane 9 superfamily member 3	TM9SF3	56889
AF043294	budding uninhibited by benzimidazoles 1 homolog (yeast)	BUB1	699	209642_at	-2.17995	1.9433	-2.16419	2.92982	1.02176	7.39247	58.1462	1.12626e-06	8.94789e-05	AF043294	budding uninhibited by benzimidazoles 1 homolog (yeast)	BUB1	699
BG291787	importin 7	IPO7	10527	200994_at	-1.44246	0.997961	-1.13201	1.24532	1.03427	10.6128	58.1288	1.12775e-06	8.94789e-05	BG291787	importin 7	IPO7	10527
BC040474	Rho guanine nucleotide exchange factor (GEF) 10	ARHGEF10	9639	1554703_at	-1.50453	3.14479	-0.851566	2.15514	-0.412782	6.24602	58.1022	1.13003e-06	8.94789e-05	BC040474	Rho guanine nucleotide exchange factor (GEF) 10	ARHGEF10	9639
NM_006759	UDP-glucose pyrophosphorylase 2	UGP2	7360	205480_s_at	-0.141835	2.28037	-1.19249	1.07489	-0.539888	10.8039	57.5623	1.17762e-06	9.26702e-05	NM_006759	UDP-glucose pyrophosphorylase 2	UGP2	7360
BC005176	transmembrane 7 superfamily member 3	TM7SF3	51768	222477_s_at	-1.14582	0.375517	-1.6377	1.45022	1.14563	9.30466	57.515	1.18189e-06	9.27394e-05	BC005176	transmembrane 7 superfamily member 3	TM7SF3	51768
AI732874	---	---		241314_at	-0.299778	0.54344	-0.678464	2.39197	-1.02371	6.37936	57.251	1.20615e-06	9.42992e-05	AI732874	---	---
NM_003211	thymine-DNA glycosylase	TDG	6996	203743_s_at	-0.990057	0.855952	-0.937866	0.410417	1.05637	9.70271	57.2425	1.20695e-06	9.42992e-05	NM_003211	thymine-DNA glycosylase	TDG	6996
AL117417	splicing factor, arginine/serine-rich 15	SFRS15	57466	233753_at	-0.600974	0.493235	-0.649876	1.98299	-0.452179	4.9335	57.2142	1.20959e-06	9.43702e-05	AL117417	splicing factor, arginine/serine-rich 15	SFRS15	57466
AL831897	---	---		1563881_at	-0.598216	2.73718	-0.0923193	0.507647	-0.591063	3.76182	57.1208	1.21834e-06	9.48604e-05	AL831897	---	---
NM_016542	serine/threonine protein kinase MST4	MST4	51765	218499_at	-2.35717	1.7448	-1.3714	1.15848	1.91752	9.64393	57.1102	1.21934e-06	9.48604e-05	NM_016542	serine/threonine protein kinase MST4	MST4	51765
AW008531	nucleoporin 205kDa	NUP205	23165	212247_at	-1.29127	1.07685	-1.3574	1.97307	0.521875	8.97745	57.0038	1.22942e-06	9.51816e-05	AW008531	nucleoporin 205kDa	NUP205	23165
AA700633	---	---		237491_at	-0.576165	2.39426	-0.124024	0.962217	-0.780718	4.84275	56.9931	1.23044e-06	9.51816e-05	AA700633	---	---
NM_003318	TTK protein kinase	TTK	7272	204822_at	-2.66844	1.82209	-0.545048	1.89838	1.15886	7.93093	56.9302	1.23646e-06	9.54504e-05	NM_003318	TTK protein kinase	TTK	7272
NM_024900	PHD finger protein 17	PHF17	79960	218517_at	-1.48357	3.03747	-0.316022	1.7449	-0.481508	9.0026	56.8657	1.24266e-06	9.54504e-05	NM_024900	PHD finger protein 17	PHF17	79960
AI204212	developmental pluripotency associated 2	DPPA2	151871	240301_at	-0.939721	3.13063	-0.221928	2.21851	-1.43488	5.49683	56.8021	1.24881e-06	9.57884e-05	AI204212	developmental pluripotency associated 2	DPPA2	151871
NM_014788	tripartite motif-containing 14	TRIM14	9830	203148_s_at	-2.40722	0.838449	-1.28088	1.28113	2.12757	7.3229	56.7338	1.25546e-06	9.60285e-05	NM_014788	tripartite motif-containing 14	TRIM14	9830
NM_004900	apolipoprotein B mRNA editing enzyme, catalytic polypeptide-like 3B	APOBEC3B	9582	206632_s_at	-0.387779	4.42869	0.234885	-2.21503	0.231644	5.78186	56.5968	1.26893e-06	9.66526e-05	NM_004900	apolipoprotein B mRNA editing enzyme, catalytic polypeptide-like 3B	APOBEC3B	9582
AI924134	---	---		242787_at	-1.54782	0.261777	-1.75927	2.09208	1.23869	6.27379	56.562	1.27238e-06	9.67227e-05	AI924134	---	---
NM_001325	cleavage stimulation factor, 3' pre-RNA, subunit 2, 64kDa	CSTF2	1478	204459_at	-1.13108	0.154177	-0.946453	1.47343	0.728372	7.6285	56.534	1.27516e-06	9.67227e-05	NM_001325	cleavage stimulation factor, 3' pre-RNA, subunit 2, 64kDa	CSTF2	1478
H16791	Fatty acyl CoA reductase 2	FAR2	55711	239108_at	-1.446	1.61202	-1.28448	2.68232	-0.023237	5.7605	56.5004	1.27851e-06	9.68425e-05	H16791	Fatty acyl CoA reductase 2	FAR2	55711
BC035108	---	---		1561341_at	-0.436899	3.26519	-0.238996	0.930964	-1.11281	5.69781	56.4189	1.28669e-06	9.73268e-05	BC035108	---	---
H47630	zinc finger protein 844	ZNF844	284391	228346_at	0.333262	1.43517	0.384284	0.392261	-1.32935	6.44233	56.2938	1.29935e-06	9.77691e-05	H47630	zinc finger protein 844	ZNF844	284391
NM_002764	phosphoribosyl pyrophosphate synthetase 1	PRPS1	5631	208447_s_at	-1.92962	0.406761	-2.0881	2.6299	1.43283	6.82491	56.269	1.30188e-06	9.77691e-05	NM_002764	phosphoribosyl pyrophosphate synthetase 1	PRPS1	5631
NM_001827	CDC28 protein kinase regulatory subunit 2	CKS2	1164	204170_s_at	-1.66827	0.803818	-1.50974	2.02176	1.05899	11.0967	56.2475	1.30408e-06	9.77691e-05	NM_001827	CDC28 protein kinase regulatory subunit 2	CKS2	1164
M55905	malic enzyme 2, NAD(+)-dependent, mitochondrial	ME2	4200	210153_s_at	-0.768541	-0.478117	-1.86326	0.205162	2.03331	8.89539	56.2176	1.30714e-06	9.77691e-05	M55905	malic enzyme 2, NAD(+)-dependent, mitochondrial	ME2	4200
AI916641	---	---		242471_at	-0.808162	1.80329	-0.473023	2.9921	-1.47232	5.96928	56.2136	1.30755e-06	9.77691e-05	AI916641	---	---
AI688573	---	---		1555845_at	-1.17485	1.7485	-0.482868	1.18807	0.121877	7.74306	56.2085	1.30808e-06	9.77691e-05	AI688573	---	---
BG540454	secretoglobin, family 3A, member 2	SCGB3A2	117156	228782_at	-0.460199	2.93866	0.0191248	1.61076	-1.60595	5.61769	56.1755	1.31146e-06	9.77691e-05	BG540454	secretoglobin, family 3A, member 2	SCGB3A2	117156
BC001605	phosphoribosyl pyrophosphate synthetase 1	PRPS1	5631	209440_at	-1.81096	1.5352	-0.784037	2.10203	0.42056	9.28265	56.162	1.31286e-06	9.77691e-05	BC001605	phosphoribosyl pyrophosphate synthetase 1	PRPS1	5631
BF970287	chromosome 20 open reading frame 160	C20orf160	140706	231991_at	0.0257265	1.45604	-0.422709	1.57749	-1.28093	6.1196	56.1508	1.31402e-06	9.77691e-05	BF970287	chromosome 20 open reading frame 160	C20orf160	140706
BF676980	glutamate-cysteine ligase, catalytic subunit	GCLC	2729	202922_at	-1.01559	1.3489	-1.25755	1.00749	0.73267	7.74836	56.0562	1.32383e-06	9.83651e-05	BF676980	glutamate-cysteine ligase, catalytic subunit	GCLC	2729
AU158936	actin related protein 2/3 complex, subunit 5-like	ARPC5L	81873	226914_at	-1.02372	0.646158	-0.949352	1.14854	0.675543	7.76295	56.0355	1.32598e-06	9.83864e-05	AU158936	actin related protein 2/3 complex, subunit 5-like	ARPC5L	81873
W74442	Fanconi anemia, complementation group I	FANCI	55215	213007_at	-1.92843	1.00984	-1.81378	2.14992	1.36772	8.27513	56.0137	1.32826e-06	9.83864e-05	W74442	Fanconi anemia, complementation group I	FANCI	55215
NM_015387	MOB1, Mps One Binder kinase activator-like 3 (yeast)	MOBKL3	25843	202919_at	-0.720276	0.717162	-1.12317	1.49645	0.232365	9.14818	55.9707	1.33278e-06	9.8494e-05	NM_015387	MOB1, Mps One Binder kinase activator-like 3 (yeast)	MOBKL3	25843
NM_171846	lactamase, beta	LACTB	114294	1552485_at	-1.27485	0.218625	-1.28598	0.0535339	2.02361	5.72699	55.9417	1.33582e-06	9.85853e-05	NM_171846	lactamase, beta	LACTB	114294
N90191	cyclin B1	CCNB1	891	228729_at	-2.6461	2.15906	-0.98937	2.25047	1.08568	8.4148	55.8945	1.34081e-06	9.882e-05	N90191	cyclin B1	CCNB1	891
NM_020375	chromosome 12 open reading frame 5	C12orf5	57103	219099_at	-2.37525	0.378729	-2.33257	2.02244	2.45576	7.52393	55.7911	1.35181e-06	9.92742e-05	NM_020375	chromosome 12 open reading frame 5	C12orf5	57103
AK021607	essential meiotic endonuclease 1 homolog 1 (S. pombe)	EME1	146956	234464_s_at	-1.68636	1.31788	-0.956362	1.52874	0.865478	7.66846	55.6958	1.36204e-06	9.95781e-05	AK021607	essential meiotic endonuclease 1 homolog 1 (S. pombe)	EME1	146956
NM_022893	B-cell CLL/lymphoma 11A (zinc finger protein)	BCL11A	53335	219497_s_at	-1.71831	0.372035	-0.920584	0.971235	1.56053	7.94295	55.6442	1.36762e-06	9.98528e-05	NM_022893	B-cell CLL/lymphoma 11A (zinc finger protein)	BCL11A	53335
AW131450	---	---		235513_at	-1.50967	0.931737	-0.376163	2.96555	-0.527162	6.67558	55.6048	1.3719e-06	9.98979e-05	AW131450	---	---
AI927931	disabled homolog 1 (Drosophila) /// OMA1 homolog, zinc metallopeptidase (S. cerevisiae)	DAB1 /// OMA1		226020_s_at	-1.66337	0.814371	-0.834708	1.60939	0.875461	7.50239	55.5568	1.37713e-06	0.000100146	AI927931	disabled homolog 1 (Drosophila) /// OMA1 homolog, zinc metallopeptidase (S. cerevisiae)	DAB1 /// OMA1
W65310	tumor necrosis factor receptor superfamily, member 10a	TNFRSF10A	8797	231775_at	-1.53434	-0.146995	-1.33263	1.09126	1.74426	7.08968	55.5036	1.38296e-06	0.000100167	W65310	tumor necrosis factor receptor superfamily, member 10a	TNFRSF10A	8797
AW007694	G2/M-phase specific E3 ubiquitin protein ligase	G2E3	55632	223256_at	-1.64612	0.945577	-1.59258	1.50146	1.39167	7.5512	55.4984	1.38354e-06	0.000100167	AW007694	G2/M-phase specific E3 ubiquitin protein ligase	G2E3	55632
T62985	acyl-CoA oxidase 1, palmitoyl	ACOX1	51	213501_at	-0.556431	0.13008	-1.55222	0.401542	1.28019	6.11576	55.4872	1.38477e-06	0.000100167	T62985	acyl-CoA oxidase 1, palmitoyl	ACOX1	51
AI277617	FYVE, RhoGEF and PH domain containing 4	FGD4	121512	230559_x_at	-1.79741	1.66861	-1.56295	2.2644	0.773578	4.89437	55.4406	1.3899e-06	0.000100406	AI277617	FYVE, RhoGEF and PH domain containing 4	FGD4	121512
AW665832	pseudouridylate synthase 7 homolog (S. cerevisiae)-like	PUS7L	83448	229751_s_at	-1.20654	0.675347	-1.07053	0.59352	1.29943	5.70538	55.4168	1.39254e-06	0.000100463	AW665832	pseudouridylate synthase 7 homolog (S. cerevisiae)-like	PUS7L	83448
NM_015239	ATP/GTP binding protein 1	AGTPBP1	23287	204500_s_at	-1.80959	1.74088	-1.08658	1.74331	0.791473	8.10819	55.3955	1.39491e-06	0.000100501	NM_015239	ATP/GTP binding protein 1	AGTPBP1	23287
AF212246	histone deacetylase 8	HDAC8	55869	223908_at	-1.29086	0.0888692	-1.21165	0.880372	1.48209	5.35874	55.2891	1.40679e-06	0.000101224	AF212246	histone deacetylase 8	HDAC8	55869
NM_002851	protein tyrosine phosphatase, receptor-type, Z polypeptide 1	PTPRZ1	5803	204469_at	-3.38962	3.80966	-1.34255	4.01326	0.33926	7.58351	55.2436	1.4119e-06	0.000101325	NM_002851	protein tyrosine phosphatase, receptor-type, Z polypeptide 1	PTPRZ1	5803
NM_005504	branched chain amino-acid transaminase 1, cytosolic	BCAT1	586	214452_at	-1.25086	0.721822	-2.2733	2.63837	0.766876	5.82103	55.2034	1.41644e-06	0.000101517	NM_005504	branched chain amino-acid transaminase 1, cytosolic	BCAT1	586
NM_003981	protein regulator of cytokinesis 1	PRC1	9055	218009_s_at	-1.61982	0.996691	-1.15915	1.69644	0.929402	9.18676	55.1216	1.42572e-06	0.000102049	NM_003981	protein regulator of cytokinesis 1	PRC1	9055
AL832142	---	---		1561195_at	-0.342753	1.80804	-0.546842	1.80947	-1.10168	5.38121	55.0658	1.43211e-06	0.000102315	AL832142	---	---
NM_005573	lamin B1	LMNB1	4001	203276_at	-2.76755	1.47278	-0.846897	0.831656	2.28678	7.76358	55.0563	1.43319e-06	0.000102315	NM_005573	lamin B1	LMNB1	4001
AL157471	Fraser syndrome 1	FRAS1	80144	226145_s_at	-2.19333	2.00008	0.935306	-0.41541	1.18004	9.19407	55.0035	1.43927e-06	0.000102374	AL157471	Fraser syndrome 1	FRAS1	80144
BF435958	---	---		227431_at	-1.2473	1.03549	-1.25805	1.36072	0.833698	7.09085	55.0024	1.4394e-06	0.000102374	BF435958	---	---
AW014927	calbindin 1, 28kDa	CALB1	793	205625_s_at	-0.36122	3.6791	-0.235292	-0.314802	-0.498418	4.42754	55.0003	1.43965e-06	0.000102374	AW014927	calbindin 1, 28kDa	CALB1	793
AI253971	---	---		241673_x_at	-0.248396	2.94307	-0.365325	-0.470137	-0.175652	3.60663	54.971	1.44302e-06	0.000102481	AI253971	---	---
NM_024609	nestin	NES	10763	218678_at	0.301293	2.64721	-0.214515	1.47213	-2.02211	8.01838	54.9151	1.44952e-06	0.000102809	NM_024609	nestin	NES	10763
NM_012113	carbonic anhydrase XIV	CA14	23632	219464_at	-0.687159	1.59526	0.070706	2.37947	-1.47804	7.39534	54.8716	1.45459e-06	0.000103035	NM_012113	carbonic anhydrase XIV	CA14	23632
BC002923	protection of telomeres 1 homolog (S. pombe)	POT1	25913	204353_s_at	-1.01875	-0.271989	-1.90883	2.27412	0.865888	6.39945	54.7969	1.46335e-06	0.000103253	BC002923	protection of telomeres 1 homolog (S. pombe)	POT1	25913
AW025362	zinc finger protein 678	ZNF678	339500	230534_at	-1.30139	1.67798	-0.990292	2.59294	-0.32637	5.87995	54.7613	1.46754e-06	0.000103282	AW025362	zinc finger protein 678	ZNF678	339500
NM_004329	bone morphogenetic protein receptor, type IA	BMPR1A	657	204832_s_at	-0.495868	2.15371	-1.12343	1.07563	-0.190167	7.96072	54.6963	1.47525e-06	0.000103691	NM_004329	bone morphogenetic protein receptor, type IA	BMPR1A	657
AI267414	Zinc finger protein 518A	ZNF518A	9849	244132_x_at	-0.929021	2.05509	0.905256	1.11652	-1.10386	5.74912	54.6306	1.48308e-06	0.000103974	AI267414	Zinc finger protein 518A	ZNF518A	9849
NM_000026	adenylosuccinate lyase	ADSL	158	202144_s_at	-1.25652	0.837965	-0.522786	0.528885	0.973128	10.2259	54.5587	1.49172e-06	0.000104445	NM_000026	adenylosuccinate lyase	ADSL	158
AW665865	phospholipase C, eta 1	PLCH1	23007	214745_at	-1.34197	0.132233	-1.35073	1.82871	0.97924	5.60246	54.4985	1.49899e-06	0.000104552	AW665865	phospholipase C, eta 1	PLCH1	23007
NM_001415	eukaryotic translation initiation factor 2, subunit 3 gamma, 52kDa	EIF2S3	1968	205321_at	-1.18602	-0.017969	-2.33814	1.31909	1.87138	7.84915	54.4161	1.50903e-06	0.000104594	NM_001415	eukaryotic translation initiation factor 2, subunit 3 gamma, 52kDa	EIF2S3	1968
AF052167	MRS2 magnesium homeostasis factor homolog (S. cerevisiae)	MRS2	57380	218536_at	-1.6332	2.98908	-1.35291	2.20722	0.0672982	7.72707	54.4091	1.50988e-06	0.000104594	AF052167	MRS2 magnesium homeostasis factor homolog (S. cerevisiae)	MRS2	57380
D30658	glycyl-tRNA synthetase	GARS	2617	208693_s_at	-0.712106	0.268061	-1.31406	1.56383	0.456241	11.0083	54.4068	1.51016e-06	0.000104594	D30658	glycyl-tRNA synthetase	GARS	2617
AA740875	glutathione S-transferase, C-terminal domain containing	GSTCD	79807	235387_at	-0.873693	0.0154535	-1.25624	0.295206	1.50923	6.61153	54.3837	1.51299e-06	0.000104594	AA740875	glutathione S-transferase, C-terminal domain containing	GSTCD	79807
AL122103	TPTE and PTEN homologous inositol lipid phosphatase pseudogene	LOC374491	374491	233675_s_at	-0.592556	2.91071	-0.271208	-0.194103	-0.0674715	4.42305	54.367	1.51504e-06	0.000104603	AL122103	TPTE and PTEN homologous inositol lipid phosphatase pseudogene	LOC374491	374491
AI742383	---	---		240231_at	-1.2228	2.52856	0.270504	2.45195	-1.43501	5.59483	54.3043	1.52276e-06	0.000104791	AI742383	---	---
AI969697	ring finger protein 125	RNF125	54941	235199_at	-1.37141	2.36916	-0.944104	2.88834	-0.714469	5.13809	54.2801	1.52575e-06	0.000104791	AI969697	ring finger protein 125	RNF125	54941
AI949827	nuclear factor (erythroid-derived 2)-like 3	NFE2L3	9603	236471_at	-1.16757	1.72989	-0.778707	2.44025	-0.516755	5.64346	54.267	1.52738e-06	0.000104791	AI949827	nuclear factor (erythroid-derived 2)-like 3	NFE2L3	9603
AI887749	---	---		243591_at	-0.972343	1.20853	-1.35629	1.37625	0.556188	6.04632	54.2362	1.5312e-06	0.000104791	AI887749	---	---
BE964473	ribulose-5-phosphate-3-epimerase	RPE	6120	221770_at	-1.07388	0.444098	-1.50163	1.21764	1.11518	7.20101	54.2138	1.53399e-06	0.000104846	BE964473	ribulose-5-phosphate-3-epimerase	RPE	6120
BE046461	doublecortin-like kinase 1	DCLK1	9201	215303_at	-0.52287	0.968815	-0.194512	2.28516	-1.19383	4.52841	54.1964	1.53616e-06	0.000104846	BE046461	doublecortin-like kinase 1	DCLK1	9201
NM_006547	insulin-like growth factor 2 mRNA binding protein 3	IGF2BP3	10643	203820_s_at	-1.01942	1.85674	-1.62189	1.67814	0.363006	10.2465	54.1836	1.53776e-06	0.000104846	NM_006547	insulin-like growth factor 2 mRNA binding protein 3	IGF2BP3	10643
NM_005513	general transcription factor IIE, polypeptide 1, alpha 56kDa	GTF2E1	2960	205930_at	-1.75226	2.4842	-0.939596	1.17819	0.765131	7.88243	54.135	1.54386e-06	0.000105131	NM_005513	general transcription factor IIE, polypeptide 1, alpha 56kDa	GTF2E1	2960
NM_003659	alkylglycerone phosphate synthase	AGPS	8540	205401_at	-0.607675	1.37751	-1.65301	0.420402	0.970242	6.3303	54.1068	1.5474e-06	0.000105139	NM_003659	alkylglycerone phosphate synthase	AGPS	8540
AW001186	---	---		228271_at	-0.0685528	1.96087	-0.327294	1.20507	-1.17025	7.02023	53.9267	1.5703e-06	0.000105745	AW001186	---	---
W80678	v-Ki-ras2 Kirsten rat sarcoma viral oncogene homolog	KRAS	3845	204009_s_at	-0.5337	1.1994	-1.78831	1.79971	0.126298	10.0886	53.831	1.58264e-06	0.000106444	W80678	v-Ki-ras2 Kirsten rat sarcoma viral oncogene homolog	KRAS	3845
AJ242547	mucin 4, cell surface associated	MUC4	4585	217109_at	-0.672384	2.62038	-0.670396	1.59636	-0.818385	4.80937	53.7721	1.59028e-06	0.000106655	AJ242547	mucin 4, cell surface associated	MUC4	4585
BC001234	von Willebrand factor A domain containing 5A	VWA5A	4013	210102_at	-0.946799	0.082709	-1.47438	1.19436	1.10591	7.43409	53.7681	1.59081e-06	0.000106655	BC001234	von Willebrand factor A domain containing 5A	VWA5A	4013
BC000147	malic enzyme 2, NAD(+)-dependent, mitochondrial	ME2	4200	209397_at	-1.56768	0.627742	-1.58156	0.316512	2.2018	9.41446	53.7565	1.59231e-06	0.000106655	BC000147	malic enzyme 2, NAD(+)-dependent, mitochondrial	ME2	4200
NM_006633	IQ motif containing GTPase activating protein 2	IQGAP2	10788	203474_at	-1.22835	3.09562	0.146212	2.37884	-1.48689	6.09645	53.7088	1.59856e-06	0.000106655	NM_006633	IQ motif containing GTPase activating protein 2	IQGAP2	10788
NM_016101	nuclear import 7 homolog (S. cerevisiae)	NIP7	51388	219031_s_at	-1.18189	-0.120762	-1.41626	0.17023	2.05283	7.85413	53.6901	1.60101e-06	0.000106655	NM_016101	nuclear import 7 homolog (S. cerevisiae)	NIP7	51388
BC035844	hypothetical protein LOC284242	LOC284242	284242	1560250_s_at	-0.682878	1.50935	-1.0078	1.83956	-0.374749	4.81479	53.678	1.6026e-06	0.000106655	BC035844	hypothetical protein LOC284242	LOC284242	284242
AA206016	feline leukemia virus subgroup C cellular receptor 1	FLVCR1	28982	228191_at	-1.81776	2.39129	-1.30134	2.02305	0.539522	8.98649	53.6696	1.60371e-06	0.000106655	AA206016	feline leukemia virus subgroup C cellular receptor 1	FLVCR1	28982
NM_001316	CSE1 chromosome segregation 1-like (yeast)	CSE1L	1434	201112_s_at	-1.46802	1.04662	-1.4784	1.42212	1.15666	10.3806	53.6573	1.60533e-06	0.000106655	NM_001316	CSE1 chromosome segregation 1-like (yeast)	CSE1L	1434
NM_004378	cellular retinoic acid binding protein 1	CRABP1	1381	205350_at	-1.16148	2.41331	-1.39251	2.78302	-0.569961	7.48831	53.6375	1.60794e-06	0.000106655	NM_004378	cellular retinoic acid binding protein 1	CRABP1	1381
BE217875	syntaxin 6	STX6	10228	212799_at	-0.666274	0.778469	-1.41679	1.45546	0.381007	8.40394	53.6301	1.60891e-06	0.000106655	BE217875	syntaxin 6	STX6	10228
AK001672	Fanconi anemia, complementation group M	FANCM	57697	234733_s_at	-1.36656	1.05814	-1.2025	1.15794	1.04356	5.90606	53.6193	1.61035e-06	0.000106655	AK001672	Fanconi anemia, complementation group M	FANCM	57697
AB033026	pleckstrin homology domain containing, family H (with MyTH4 domain) member 1	PLEKHH1	57475	225726_s_at	-1.89842	1.7629	-0.0231117	1.16735	0.547963	7.24745	53.615	1.6109e-06	0.000106655	AB033026	pleckstrin homology domain containing, family H (with MyTH4 domain) member 1	PLEKHH1	57475
BF338332	unkempt homolog (Drosophila)-like	UNKL	64718	229908_s_at	-1.33179	1.11782	-0.757168	0.84768	0.898845	7.93477	53.6131	1.61116e-06	0.000106655	BF338332	unkempt homolog (Drosophila)-like	UNKL	64718
AF060511	bolA homolog 2 (E. coli) /// bolA homolog 2B (E. coli)	BOLA2 /// BOLA2B		209836_x_at	-1.06866	0.121821	-0.910173	0.703255	1.166	9.45056	53.581	1.61541e-06	0.000106807	AF060511	bolA homolog 2 (E. coli) /// bolA homolog 2B (E. coli)	BOLA2 /// BOLA2B
AI816281	---	---		228974_at	0.0376915	2.57381	0.295799	2.22404	-2.57552	7.4267	53.5287	1.62237e-06	0.000107138	AI816281	---	---
AK024433	mitochondrial ribosomal protein S25	MRPS25	64432	224873_s_at	-1.73505	1.81558	-0.756517	0.717793	1.15567	5.92559	53.5118	1.62464e-06	0.000107158	AK024433	mitochondrial ribosomal protein S25	MRPS25	64432
AF131807	SERPINE1 mRNA binding protein 1	SERBP1	26135	217724_at	-0.97521	0.779696	-1.20119	1.00674	0.844943	11.808	53.4003	1.63962e-06	0.000108015	AF131807	SERPINE1 mRNA binding protein 1	SERBP1	26135
BC005883	missing oocyte, meiosis regulator, homolog (Drosophila)	MIOS	54468	211724_x_at	-1.13878	0.879777	-0.844919	1.55329	0.373268	8.02288	53.2501	1.66009e-06	0.000109232	BC005883	missing oocyte, meiosis regulator, homolog (Drosophila)	MIOS	54468
NM_003193	tubulin folding cofactor E	TBCE	6905	203715_at	-1.62062	0.663517	-1.23431	2.16477	0.779146	6.62567	53.1949	1.66768e-06	0.000109399	NM_003193	tubulin folding cofactor E	TBCE	6905
BG260087	coxsackie virus and adenovirus receptor	CXADR	1525	226374_at	-0.547666	1.97118	-1.55265	1.6788	-0.193493	9.85567	53.1867	1.66882e-06	0.000109399	BG260087	coxsackie virus and adenovirus receptor	CXADR	1525
AV700885	BEN domain containing 3	BEND3	57673	227920_at	-1.27946	2.04624	-0.981426	1.3886	0.325932	6.99943	53.1817	1.66951e-06	0.000109399	AV700885	BEN domain containing 3	BEND3	57673
AI609256	---	---		229500_at	-1.65741	1.28634	-1.46828	0.831834	1.65293	6.38216	53.1331	1.67624e-06	0.000109598	AI609256	---	---
W92036	proprotein convertase subtilisin/kexin type 9	PCSK9	255738	227759_at	-0.480909	1.69586	-0.689907	2.56127	-1.33196	6.76003	53.1139	1.67891e-06	0.000109598	W92036	proprotein convertase subtilisin/kexin type 9	PCSK9	255738
AW194766	cyclin-dependent kinase 6	CDK6	1021	243000_at	-1.01214	0.398272	-1.44248	2.20059	0.373981	6.10446	53.1082	1.67971e-06	0.000109598	AW194766	cyclin-dependent kinase 6	CDK6	1021
NM_020300	microsomal glutathione S-transferase 1	MGST1	4257	231736_x_at	-1.30886	0.292268	-2.4971	2.02543	1.52589	10.9916	52.9185	1.70638e-06	0.000110724	NM_020300	microsomal glutathione S-transferase 1	MGST1	4257
AF085969	---	---		1557805_at	-0.598431	1.66225	-0.644863	1.63205	-0.613773	4.19046	52.9045	1.70836e-06	0.000110724	AF085969	---	---
AA631103	---	---		239847_at	-1.4054	0.0478998	-1.08396	1.95102	0.811392	5.48262	52.9029	1.70858e-06	0.000110724	AA631103	---	---
AI911518	G patch domain containing 4	GPATCH4	54865	224634_at	-2.22012	1.21085	-0.808914	1.22398	1.5398	7.62872	52.8885	1.71063e-06	0.000110724	AI911518	G patch domain containing 4	GPATCH4	54865
AI935915	SH3-binding domain kinase 1	SBK1	388228	226548_at	-0.969487	1.49868	-0.0516485	1.38836	-0.421215	7.93326	52.8842	1.71124e-06	0.000110724	AI935915	SH3-binding domain kinase 1	SBK1	388228
AA448346	nardilysin (N-arginine dibasic convertase)	NRD1	4898	229422_at	-1.39627	1.34703	-0.58127	1.42041	0.387839	6.49329	52.8776	1.71219e-06	0.000110724	AA448346	nardilysin (N-arginine dibasic convertase)	NRD1	4898
AI823905	G2/M-phase specific E3 ubiquitin protein ligase	G2E3	55632	223257_at	-2.13993	1.53956	-2.31501	2.20009	1.70336	6.68473	52.786	1.72529e-06	0.000111035	AI823905	G2/M-phase specific E3 ubiquitin protein ligase	G2E3	55632
AI125646	zinc finger protein 207	ZNF207	7756	228157_at	-1.6973	2.14542	-0.330181	0.802475	0.667295	7.61846	52.7526	1.73011e-06	0.000111079	AI125646	zinc finger protein 207	ZNF207	7756
NM_002968	sal-like 1 (Drosophila)	SALL1	6299	206893_at	-0.671874	0.499855	-1.231	4.16372	-1.44989	5.57628	52.7277	1.73371e-06	0.000111079	NM_002968	sal-like 1 (Drosophila)	SALL1	6299
AI928035	iroquois homeobox 2	IRX2	153572	228462_at	-0.663066	1.63606	-0.798819	2.88418	-1.27253	5.46392	52.7078	1.7366e-06	0.000111079	AI928035	iroquois homeobox 2	IRX2	153572
AW170015	phosphatidylinositol-specific phospholipase C, X domain containing 2	PLCXD2	257068	235230_at	-0.826192	0.725048	-1.31521	0.598148	1.06255	5.38996	52.7024	1.73737e-06	0.000111079	AW170015	phosphatidylinositol-specific phospholipase C, X domain containing 2	PLCXD2	257068
N30069	hypothetical protein LOC253842 /// nuclear receptor subfamily 6, group A, member 1	LOC253842 /// NR6A1		227494_at	-0.0994354	0.892876	-0.216414	1.44495	-1.01722	7.64866	52.6992	1.73783e-06	0.000111079	N30069	hypothetical protein LOC253842 /// nuclear receptor subfamily 6, group A, member 1	LOC253842 /// NR6A1
AI076810	dynein, axonemal, heavy chain 14	DNAH14	127602	242283_at	-2.07296	0.10741	-1.11091	2.78034	0.924208	6.7736	52.6666	1.74258e-06	0.000111079	AI076810	dynein, axonemal, heavy chain 14	DNAH14	127602
BE552138	complement component (3b/4b) receptor 1-like	CR1L	1379	239206_at	-0.103945	2.97708	0.104485	-0.623908	-0.542134	4.38051	52.6464	1.74552e-06	0.000111079	BE552138	complement component (3b/4b) receptor 1-like	CR1L	1379
AB046783	amyotrophic lateral sclerosis 2 (juvenile)	ALS2	57679	226291_at	-1.07743	0.445104	-0.892333	1.13784	0.765388	7.45729	52.6411	1.7463e-06	0.000111079	AB046783	amyotrophic lateral sclerosis 2 (juvenile)	ALS2	57679
AF114488	intersectin 1 (SH3 domain protein)	ITSN1	6453	209297_at	-0.616455	0.922586	-1.22347	1.6348	0.0347125	8.69111	52.6345	1.74726e-06	0.000111079	AF114488	intersectin 1 (SH3 domain protein)	ITSN1	6453
AK021441	---	---		232347_x_at	-0.987785	1.76205	0.357448	0.69986	-0.304435	7.08865	52.615	1.75011e-06	0.000111079	AK021441	---	---
NM_004504	ArfGAP with FG repeats 1	AGFG1	3267	218092_s_at	-0.398244	1.01261	-1.89901	0.795011	0.796706	8.28584	52.5797	1.75529e-06	0.000111079	NM_004504	ArfGAP with FG repeats 1	AGFG1	3267
BC000941	selenophosphate synthetase 1	SEPHS1	22929	208941_s_at	-1.59263	2.60459	-1.13749	1.32814	0.59733	8.09038	52.558	1.75849e-06	0.000111153	BC000941	selenophosphate synthetase 1	SEPHS1	22929
NM_003244	TGFB-induced factor homeobox 1	TGIF1	7050	203313_s_at	0.126761	1.39512	-1.58503	2.16557	-0.978826	8.88804	52.5385	1.76135e-06	0.000111205	NM_003244	TGFB-induced factor homeobox 1	TGIF1	7050
AW409794	ribosomal modification protein rimK-like family member B	RIMKLB	57494	225978_at	-1.32874	1.49912	-1.24958	0.908605	1.05635	6.36646	52.5063	1.76612e-06	0.000111205	AW409794	ribosomal modification protein rimK-like family member B	RIMKLB	57494
NM_018094	G1 to S phase transition 2	GSPT2	23708	205541_s_at	-1.00558	0.839017	-1.31286	1.43479	0.64462	8.35801	52.4406	1.77587e-06	0.000111205	NM_018094	G1 to S phase transition 2	GSPT2	23708
AI763206	serine/threonine kinase 4	STK4	6789	243981_at	-0.596774	1.19787	-0.350446	1.43713	-0.526976	4.21681	52.4306	1.77736e-06	0.000111205	AI763206	serine/threonine kinase 4	STK4	6789
AB033041	vang-like 2 (van gogh, Drosophila)	VANGL2	57216	226029_at	-1.07046	2.06526	-0.884147	2.29364	-0.557621	7.69314	52.4214	1.77874e-06	0.000111205	AB033041	vang-like 2 (van gogh, Drosophila)	VANGL2	57216
NM_006429	chaperonin containing TCP1, subunit 7 (eta)	CCT7	10574	200812_at	-1.07078	0.791088	-1.45784	0.862188	1.20418	10.8084	52.4042	1.78129e-06	0.000111205	NM_006429	chaperonin containing TCP1, subunit 7 (eta)	CCT7	10574
BF439204	chromosome 12 open reading frame 29	C12orf29	91298	228378_at	-0.894571	-0.441776	-1.86647	1.1065	1.54847	6.79924	52.2389	1.80624e-06	0.000112351	BF439204	chromosome 12 open reading frame 29	C12orf29	91298
T97717	Proteasome (prosome, macropain) activator subunit 4	PSME4	23198	237180_at	-0.903597	2.52959	0.864376	1.22011	-1.32926	6.53076	52.0916	1.82881e-06	0.000113417	T97717	Proteasome (prosome, macropain) activator subunit 4	PSME4	23198
NM_004749	transforming growth factor beta regulator 4	TBRG4	9238	220789_s_at	-0.97822	0.223918	-1.12395	1.72558	0.50249	8.09724	52.0864	1.82961e-06	0.000113417	NM_004749	transforming growth factor beta regulator 4	TBRG4	9238
D88357	cyclin-dependent kinase 1	CDK1	983	210559_s_at	-1.97525	0.30891	-2.24611	2.43767	1.74458	8.09226	52.0697	1.83219e-06	0.000113448	D88357	cyclin-dependent kinase 1	CDK1	983
BE221922	apolipoprotein O-like	APOOL	139322	213289_at	-1.27275	-0.619266	-1.74092	1.62944	1.55349	6.53988	51.9792	1.84627e-06	0.000114119	BE221922	apolipoprotein O-like	APOOL	139322
BC001627	2-hydroxyacyl-CoA lyase 1	HACL1	26061	223211_at	-1.50324	0.763347	-1.04049	1.19617	1.145	7.54773	51.8633	1.86448e-06	0.000114927	BC001627	2-hydroxyacyl-CoA lyase 1	HACL1	26061
AA993566	---	---		239597_at	-1.06911	3.32435	1.3828	1.83806	-2.18625	6.71912	51.7687	1.87952e-06	0.000115592	AA993566	---	---
NM_014932	neuroligin 1	NLGN1	22871	205893_at	-0.847072	0.564722	-0.986823	2.58287	-0.405196	4.52736	51.596	1.90732e-06	0.000116723	NM_014932	neuroligin 1	NLGN1	22871
AA102581	ubiquitin specific peptidase 31	USP31	57478	226035_at	-1.40349	1.13084	-0.714826	1.35105	0.602396	8.13436	51.5751	1.91073e-06	0.000116723	AA102581	ubiquitin specific peptidase 31	USP31	57478
NM_024077	SECIS binding protein 2	SECISBP2	79048	218265_at	-1.36888	1.62965	-0.461515	1.68096	0.0126968	7.55781	51.4906	1.92454e-06	0.000117436	NM_024077	SECIS binding protein 2	SECISBP2	79048
NM_018355	zinc finger protein 415	ZNF415	55786	205514_at	0.190954	1.17824	-0.14008	1.93282	-1.77886	5.63922	51.453	1.93075e-06	0.000117552	NM_018355	zinc finger protein 415	ZNF415	55786
NM_023107	fibroblast growth factor receptor 1	FGFR1	2260	207822_at	-0.411932	1.89499	-0.900111	2.21219	-1.09445	5.12819	51.4257	1.93525e-06	0.000117695	NM_023107	fibroblast growth factor receptor 1	FGFR1	2260
NM_018087	transmembrane protein 48	TMEM48	55706	218073_s_at	-1.19262	0.0819132	-1.75377	1.28335	1.47893	6.46857	51.3981	1.93982e-06	0.000117708	NM_018087	transmembrane protein 48	TMEM48	55706
BC000436	endosulfine alpha	ENSA	2029	202596_at	-1.09802	1.14649	-0.40149	0.421009	0.702839	9.54757	51.3831	1.94232e-06	0.000117708	BC000436	endosulfine alpha	ENSA	2029
AV704017	---	---		222376_at	-0.00699694	0.615329	-0.413854	1.67078	-1.03606	6.0904	51.3634	1.94559e-06	0.000117708	AV704017	---	---
AL049923	oxysterol binding protein-like 8	OSBPL8	114882	212582_at	-1.17354	0.935958	-1.27916	0.407913	1.44239	9.72617	51.3587	1.94637e-06	0.000117708	AL049923	oxysterol binding protein-like 8	OSBPL8	114882
AI692878	MOB1, Mps One Binder kinase activator-like 2B (yeast)	MOBKL2B	79817	229568_at	-1.46299	0.572876	-0.817816	1.86373	0.574753	6.2304	51.3115	1.95425e-06	0.000117919	AI692878	MOB1, Mps One Binder kinase activator-like 2B (yeast)	MOBKL2B	79817
AL137427	---	---		1564964_at	-0.484353	1.58157	-0.570702	1.58968	-0.722159	4.21167	51.2563	1.96353e-06	0.000118099	AL137427	---	---
NM_007054	kinesin family member 3A	KIF3A	11127	213623_at	-0.630684	0.47281	-1.57001	-0.00997682	1.52641	6.42561	51.2135	1.97074e-06	0.000118256	NM_007054	kinesin family member 3A	KIF3A	11127
BE503800	DEAD (Asp-Glu-Ala-Asp) box polypeptide 31	DDX31	64794	235436_at	-1.83747	0.856353	-0.833996	1.08848	1.38236	6.0769	51.2069	1.97187e-06	0.000118256	BE503800	DEAD (Asp-Glu-Ala-Asp) box polypeptide 31	DDX31	64794
BC040965	---	---		1562529_s_at	0.388921	1.80378	-0.595134	0.708325	-1.06564	5.68993	51.1373	1.98369e-06	0.000118618	BC040965	---	---
AK023446	aminoadipate-semialdehyde synthase	AASS	10157	214829_at	-2.61541	3.52777	-0.581673	1.26193	0.98598	7.30258	51.1285	1.98519e-06	0.000118618	AK023446	aminoadipate-semialdehyde synthase	AASS	10157
AB032931	ubiquitin-conjugating enzyme E2T (putative)	UBE2T	29089	223229_at	-2.22591	0.270083	-1.41031	2.34751	1.51108	8.23764	51.1049	1.98923e-06	0.000118645	AB032931	ubiquitin-conjugating enzyme E2T (putative)	UBE2T	29089
AF326731	NUF2, NDC80 kinetochore complex component, homolog (S. cerevisiae)	NUF2	83540	223381_at	-2.68907	1.76083	-2.34588	3.04543	1.63576	7.49652	51.0625	1.99649e-06	0.000118645	AF326731	NUF2, NDC80 kinetochore complex component, homolog (S. cerevisiae)	NUF2	83540
AI366784	TAF4b RNA polymerase II, TATA box binding protein (TBP)-associated factor, 105kDa	TAF4B	6875	235020_at	-2.02235	1.52445	-0.654393	0.613595	1.5414	6.92516	51.0606	1.99681e-06	0.000118645	AI366784	TAF4b RNA polymerase II, TATA box binding protein (TBP)-associated factor, 105kDa	TAF4B	6875
AL049245	---	---		1563357_at	0.041715	3.07282	0.284597	0.101509	-1.32339	4.37911	51.0572	1.99739e-06	0.000118645	AL049245	---	---
H71224	---	---		240170_at	-0.801947	1.63194	-0.888538	1.36517	-0.0597876	5.39615	51.0479	1.999e-06	0.000118645	H71224	---	---
N64686	chromosome 1 open reading frame 96	C1orf96	126731	225904_at	-1.59914	2.4	-1.5385	2.22985	0.338244	7.75029	51.0246	2.00302e-06	0.000118645	N64686	chromosome 1 open reading frame 96	C1orf96	126731
AK095151	Ubiquitin protein ligase E3 component n-recognin 5	UBR5	51366	1555888_at	-1.07822	1.30641	-1.45762	0.14529	1.51764	5.67943	50.997	2.00779e-06	0.000118799	AK095151	Ubiquitin protein ligase E3 component n-recognin 5	UBR5	51366
AL120375	ring finger protein, transmembrane 2	RNFT2	84900	221908_at	-1.30895	1.08517	-0.0164091	1.44787	-0.00707864	7.14807	50.9321	2.01905e-06	0.000119207	AL120375	ring finger protein, transmembrane 2	RNFT2	84900
BF516583	---	---		239630_at	-0.596182	0.823744	-0.458906	2.59008	-1.09918	4.73631	50.9032	2.02409e-06	0.000119247	BF516583	---	---
NM_003321	Tu translation elongation factor, mitochondrial	TUFM	7284	201113_at	-1.14959	0.101077	-1.3235	0.874182	1.41544	10.1645	50.8545	2.03261e-06	0.00011938	NM_003321	Tu translation elongation factor, mitochondrial	TUFM	7284
AK000490	DEP domain containing 1	DEPDC1	55635	222958_s_at	-2.29541	0.710169	-1.37377	2.40481	1.37133	7.63261	50.8093	2.04058e-06	0.000119702	AK000490	DEP domain containing 1	DEPDC1	55635
AI709389	synaptojanin 2 binding protein	SYNJ2BP	55333	227274_at	-0.895187	0.92202	-0.566119	-0.0861508	1.02269	9.25108	50.7958	2.04296e-06	0.000119712	AI709389	synaptojanin 2 binding protein	SYNJ2BP	55333
AA628539	eukaryotic translation initiation factor 3, subunit B	EIF3B	8662	242550_at	-2.04254	2.50631	-1.10792	1.95003	0.645702	6.88226	50.7518	2.05075e-06	0.000119912	AA628539	eukaryotic translation initiation factor 3, subunit B	EIF3B	8662
NM_001446	fatty acid binding protein 7, brain	FABP7	2173	205030_at	-1.50409	2.12116	-1.41511	-0.498485	2.07277	6.98266	50.7013	2.05974e-06	0.000120308	NM_001446	fatty acid binding protein 7, brain	FABP7	2173
BG170762	ubiquitin-conjugating enzyme E2G 1 (UBC7 homolog, yeast)	UBE2G1	7326	226005_at	-1.24702	2.29699	-1.00696	0.844058	0.589956	8.39829	50.6405	2.07063e-06	0.000120651	BG170762	ubiquitin-conjugating enzyme E2G 1 (UBC7 homolog, yeast)	UBE2G1	7326
NM_005232	EPH receptor A1	EPHA1	2041	205977_s_at	-0.871687	1.68068	-0.415516	2.7036	-1.21393	6.56096	50.6207	2.0742e-06	0.000120651	NM_005232	EPH receptor A1	EPHA1	2041
AW137517	---	---		231079_at	-0.558607	2.70711	0.100289	2.41196	-2.0186	7.05386	50.5821	2.08115e-06	0.000120651	AW137517	---	---
NM_006342	transforming, acidic coiled-coil containing protein 3	TACC3	10460	218308_at	-1.60009	1.61848	-0.487149	1.48034	0.398464	7.85142	50.5769	2.0821e-06	0.000120651	NM_006342	transforming, acidic coiled-coil containing protein 3	TACC3	10460
AA894574	FK506 binding protein 4, 59kDa	FKBP4	2288	200894_s_at	-1.36152	-0.0458811	-2.35571	2.63691	1.18935	7.75609	50.5704	2.08327e-06	0.000120651	AA894574	FK506 binding protein 4, 59kDa	FKBP4	2288
AI583537	mannose-6-phosphate receptor (cation dependent)	M6PR	4074	200900_s_at	-1.03363	-0.0697087	-1.7586	2.3647	0.652798	8.07958	50.5286	2.09085e-06	0.000120708	AI583537	mannose-6-phosphate receptor (cation dependent)	M6PR	4074
BC041488	Hypothetical protein LOC339260	LOC339260	339260	1560099_at	-0.352234	2.64395	-0.155879	-0.437637	-0.133406	3.40689	50.5284	2.09089e-06	0.000120708	BC041488	Hypothetical protein LOC339260	LOC339260	339260
NM_030892	---	---		220969_s_at	-0.650067	1.84221	-0.743879	1.33138	-0.355669	5.21704	50.4702	2.10149e-06	0.000121064	NM_030892	---	---
AA630626	glutamate-cysteine ligase, modifier subunit	GCLM	2730	234986_at	-1.61389	0.159179	-1.69014	1.18391	1.89831	5.94698	50.3814	2.11782e-06	0.000121748	AA630626	glutamate-cysteine ligase, modifier subunit	GCLM	2730
AA814383	---	---		236924_at	-1.29831	1.84578	-0.249705	2.62812	-0.902558	5.71063	50.3657	2.12071e-06	0.000121786	AA814383	---	---
NM_014446	integrin beta 1 binding protein 3	ITGB1BP3	27231	221051_s_at	-0.598532	1.09627	-0.00230177	2.51897	-1.44467	7.07189	50.3518	2.12329e-06	0.000121806	NM_014446	integrin beta 1 binding protein 3	ITGB1BP3	27231
AK025654	CTP synthase II	CTPS2	56474	222819_at	-1.03413	0.999059	-0.837408	1.69088	0.132124	7.87942	50.2805	2.13655e-06	0.000122181	AK025654	CTP synthase II	CTPS2	56474
AW137669	heterogeneous nuclear ribonucleoprotein U (scaffold attachment factor A)	HNRNPU	3192	225805_at	-1.34899	0.664085	-1.86144	1.86614	1.12449	6.88129	50.2615	2.14009e-06	0.000122256	AW137669	heterogeneous nuclear ribonucleoprotein U (scaffold attachment factor A)	HNRNPU	3192
AW005866	---	---		238299_at	-0.931042	1.67663	-0.611491	1.55653	-0.25786	6.01962	50.2185	2.14815e-06	0.000122588	AW005866	---	---
AK022040	---	---		233445_at	-0.845738	1.98951	-0.383887	2.02095	-0.908807	6.45303	50.206	2.15051e-06	0.000122595	AK022040	---	---
BC000973	G2/M-phase specific E3 ubiquitin protein ligase	G2E3	55632	223258_s_at	-1.56487	0.232452	-1.38653	1.44019	1.45161	7.01286	50.1768	2.15601e-06	0.00012267	BC000973	G2/M-phase specific E3 ubiquitin protein ligase	G2E3	55632
AI986192	serpin peptidase inhibitor, clade B (ovalbumin), member 9	SERPINB9	5272	242814_at	0.368274	3.34297	0.409749	-0.326693	-1.53797	6.21952	50.1751	2.15632e-06	0.00012267	AI986192	serpin peptidase inhibitor, clade B (ovalbumin), member 9	SERPINB9	5272
NM_001826	CDC28 protein kinase regulatory subunit 1B	CKS1B	1163	201897_s_at	-1.56806	0.832791	-1.55715	2.6686	0.549491	10.198	50.1091	2.16883e-06	0.000122867	NM_001826	CDC28 protein kinase regulatory subunit 1B	CKS1B	1163
AF151861	androgen-induced 1	AIG1	51390	223136_at	-1.12972	1.11375	-0.244075	-0.835001	1.47785	7.34705	50.1045	2.1697e-06	0.000122867	AF151861	androgen-induced 1	AIG1	51390
BC000196	cyclin G1	CCNG1	900	208796_s_at	-0.930647	1.24631	-1.25651	0.759892	0.846289	11.1604	50.1009	2.17038e-06	0.000122867	BC000196	cyclin G1	CCNG1	900
AU155565	choroideremia-like (Rab escort protein 2)	CHML	1122	226350_at	-2.36192	2.07287	-0.785836	0.678072	1.7428	9.09227	50.0974	2.17104e-06	0.000122867	AU155565	choroideremia-like (Rab escort protein 2)	CHML	1122
AK026366	zinc finger protein 677	ZNF677	342926	1560562_a_at	-0.122188	1.68044	0.022466	1.38889	-1.37886	5.97959	50.078	2.17475e-06	0.00012295	AK026366	zinc finger protein 677	ZNF677	342926
NM_012244	solute carrier family 7 (amino acid transporter, L-type), member 8	SLC7A8	23428	202752_x_at	0.310808	2.06565	-0.139325	0.723742	-1.38897	7.93216	50.0614	2.17791e-06	0.000123001	NM_012244	solute carrier family 7 (amino acid transporter, L-type), member 8	SLC7A8	23428
AB032981	poly(A) binding protein interacting protein 2B	PAIP2B	400961	221868_at	-0.480727	1.92688	0.0665172	1.54224	-1.23407	6.25606	50.0483	2.18041e-06	0.000123002	AB032981	poly(A) binding protein interacting protein 2B	PAIP2B	400961
NM_002936	ribonuclease H1	RNASEH1	246243	218497_s_at	-0.96335	1.2179	-0.994529	0.70826	0.748231	8.38139	50.0377	2.18243e-06	0.000123002	NM_002936	ribonuclease H1	RNASEH1	246243
NM_032805	zinc finger and SCAN domain containing 10	ZSCAN10	84891	1553875_s_at	-0.207316	2.24284	-0.583913	1.28412	-1.0071	6.19159	49.9999	2.1897e-06	0.000123157	NM_032805	zinc finger and SCAN domain containing 10	ZSCAN10	84891
U19599	BCL2-associated X protein	BAX	581	211833_s_at	-1.51849	-0.0648097	-2.07086	0.458386	2.61508	7.90762	49.961	2.19719e-06	0.000123408	U19599	BCL2-associated X protein	BAX	581
NM_007086	WD repeat and HMG-box DNA binding protein 1	WDHD1	11169	204728_s_at	-1.57197	2.55231	-1.23518	2.1713	0.0971208	6.11493	49.9534	2.19866e-06	0.000123408	NM_007086	WD repeat and HMG-box DNA binding protein 1	WDHD1	11169
BC028974	zinc finger protein 57	ZNF57	126295	1554628_at	-0.929365	1.03728	-0.993831	1.57135	0.198595	6.24035	49.8973	2.20953e-06	0.00012389	BC028974	zinc finger protein 57	ZNF57	126295
AL556409	galanin prepropeptide	GAL	51083	214240_at	-2.55449	2.34459	-2.24634	2.76593	1.42656	7.82886	49.8647	2.21588e-06	0.000123979	AL556409	galanin prepropeptide	GAL	51083
AK024960	spermatid perinuclear RNA binding protein	STRBP	55342	233252_s_at	-1.27636	1.46365	-1.10686	2.03484	0.169829	8.15299	49.8359	2.22152e-06	0.000123979	AK024960	spermatid perinuclear RNA binding protein	STRBP	55342
BF064224	DNA fragmentation factor, 45kDa, alpha polypeptide	DFFA	1676	226116_at	-1.1637	1.57324	-1.064	0.778536	0.829592	9.0909	49.831	2.22247e-06	0.000123979	BF064224	DNA fragmentation factor, 45kDa, alpha polypeptide	DFFA	1676
AI758317	zinc finger protein 738	ZNF738	148203	241826_x_at	-1.34305	2.22733	-0.607307	1.70562	-0.131605	5.37973	49.7953	2.22946e-06	0.000124116	AI758317	zinc finger protein 738	ZNF738	148203
BG500396	transmembrane protein 33	TMEM33	55161	225492_at	-1.06029	0.808432	-1.25707	0.538575	1.26981	9.23265	49.7191	2.24451e-06	0.000124826	BG500396	transmembrane protein 33	TMEM33	55161
U15555	serine palmitoyltransferase, long chain base subunit 2	SPTLC2	9517	216202_s_at	0.332691	0.280282	-2.0073	-0.230352	1.06565	6.25724	49.7024	2.24782e-06	0.000124883	U15555	serine palmitoyltransferase, long chain base subunit 2	SPTLC2	9517
AI084451	---	---		1559391_s_at	-1.53806	2.3526	0.495286	2.11126	-0.983839	6.01356	49.5398	2.28039e-06	0.0001263	AI084451	---	---
NM_016142	hydroxysteroid (17-beta) dehydrogenase 12	HSD17B12	51144	217869_at	-0.955044	0.434129	-0.86449	0.823339	0.837769	10.6588	49.529	2.28257e-06	0.0001263	NM_016142	hydroxysteroid (17-beta) dehydrogenase 12	HSD17B12	51144
AI671049	cyclin E1	CCNE1	898	213523_at	-1.25458	1.35959	-0.646202	1.15687	0.460941	8.46798	49.5046	2.28751e-06	0.000126445	AI671049	cyclin E1	CCNE1	898
AW269686	RAP2B, member of RAS oncogene family	RAP2B	5912	238622_at	-1.0619	-0.0126696	-1.13195	0.267455	1.64246	6.12369	49.475	2.29352e-06	0.000126615	AW269686	RAP2B, member of RAS oncogene family	RAP2B	5912
BF669455	CD164 molecule, sialomucin	CD164	8763	208654_s_at	0.506338	-0.333718	-2.03642	-0.230075	1.1159	8.72999	49.451	2.2984e-06	0.000126615	BF669455	CD164 molecule, sialomucin	CD164	8763
AF220030	tripartite motif-containing 6	TRIM6	117854	223599_at	-1.57361	2.3384	-0.653385	2.23238	-0.258516	7.87195	49.4487	2.29887e-06	0.000126615	AF220030	tripartite motif-containing 6	TRIM6	117854
NM_015986	cytokine receptor-like factor 3	CRLF3	51379	205474_at	-1.49761	0.982158	-1.50062	1.24508	1.34059	8.40944	49.3781	2.31334e-06	0.000127101	NM_015986	cytokine receptor-like factor 3	CRLF3	51379
AI732802	---	---		222371_at	-0.721418	1.81902	0.0533312	2.16218	-1.36193	5.95277	49.3533	2.31843e-06	0.000127253	AI732802	---	---
NM_024772	zinc finger, MYM-type 1	ZMYM1	79830	220206_at	-1.46342	1.04424	-0.991707	1.87281	0.527934	6.62715	49.3116	2.32706e-06	0.000127342	NM_024772	zinc finger, MYM-type 1	ZMYM1	79830

## Sheet: 3.UpPGC vs.EGC
Representative Public ID	Gene Title	Gene Symbol	Entrez Gene	ID	EGCvsREF	ESCvsREF	PGCvsREF	ECCvsREF	IPSCvsREF	AveExpr	F	P.Value	adj.P.Val
NM_018189	developmental pluripotency associated 4	DPPA4	55211	219651_at	-2.05273	5.06969	-0.0214575	4.58596	-2.68016	6.2434	504.204	6.43991e-11	1.94578e-06
T50399	hemoglobin, alpha 1 /// hemoglobin, alpha 2	HBA1 /// HBA2		214414_x_at	-1.34679	-0.684915	7.62771	-2.16546	-2.0664	6.24497	456.006	1.01976e-10	1.94578e-06
NM_000702	ATPase, Na+/K+ transporting, alpha 2 polypeptide	ATP1A2	477	203296_s_at	-1.84658	2.27442	0.554424	3.96274	-1.92301	5.58404	350.118	3.41158e-10	2.07018e-06
U55764	sulfotransferase family 1E, estrogen-preferring, member 1	SULT1E1	6783	222940_at	-1.05115	-1.01709	5.02811	-1.27024	-1.11507	4.40813	303.127	6.58606e-10	3.59684e-06
NM_024865	Nanog homeobox	NANOG	79923	220184_at	-2.11592	4.67599	0.939593	5.05746	-3.44078	7.40366	267.546	1.16378e-09	4.63466e-06
NM_004734	doublecortin-like kinase 1	DCLK1	9201	205399_at	-1.8683	4.30257	-0.629655	4.61653	-2.2238	7.13008	266.72	1.1803e-09	4.63466e-06
V00489	hemoglobin, alpha 1 /// hemoglobin, alpha 2	HBA1 /// HBA2		217414_x_at	-0.803625	-1.02472	5.66016	-1.59391	-1.56563	7.29711	257.319	1.38994e-09	4.63466e-06
AW118997	---	---		240681_at	-1.3472	3.6381	-0.286526	3.31915	-1.88725	5.48589	245.006	1.73774e-09	4.63466e-06
BC001186	protocadherin beta 5	PCDHB5	26167	223629_at	-1.18398	3.03635	-0.0100213	2.86398	-1.73077	5.68633	238.235	1.97422e-09	4.63466e-06
BC002665	proteolipid protein 1	PLP1	5354	210198_s_at	-3.13425	2.26435	-1.56075	1.93455	2.13026	7.21752	234.61	2.11695e-09	4.63466e-06
NM_002667	phospholamban	PLN	5350	204939_s_at	-0.845654	-0.907109	5.29029	-1.37363	-1.46309	5.81263	226.972	2.46105e-09	4.63466e-06
NM_002667	phospholamban	PLN	5350	204940_at	-0.779444	-0.893217	3.97364	-0.918782	-0.959389	4.20244	222.832	2.67605e-09	4.71442e-06
AI669815	SRY (sex determining region Y)-box 2	SOX2	6657	228038_at	-3.39814	3.77653	-1.86066	3.99344	0.717442	7.79467	210.344	3.47863e-09	5.557e-06
AA758105	hypothetical protein LOC100292909	LOC100292909	100292909	241535_at	-2.38866	3.14625	-0.918619	3.75566	-0.551449	6.93145	201.431	4.23525e-09	5.93951e-06
BC005931	hemoglobin, alpha 1 /// hemoglobin, alpha 2	HBA1 /// HBA2		211745_x_at	-0.636277	-1.45117	5.65158	-1.75317	-1.47894	7.17636	186.571	5.99858e-09	7.28002e-06
N32798	zinc finger protein 42 homolog (mouse)	ZFP42	132625	243161_x_at	-0.817953	5.43699	0.899119	-0.776172	-1.07634	4.7583	177.308	7.55836e-09	8.20899e-06
NM_000558	hemoglobin, alpha 1 /// hemoglobin, alpha 2	HBA1 /// HBA2		204018_x_at	-0.544432	-1.19089	4.95442	-1.54024	-1.33472	7.35638	176.09	7.79847e-09	8.20899e-06
BC002712	v-myc myelocytomatosis viral related oncogene, neuroblastoma derived (avian)	MYCN	4613	209757_s_at	-1.11965	3.39407	0.325505	3.57754	-2.61374	7.2612	174.579	8.10937e-09	8.20899e-06
NM_006681	neuromedin U	NMU	10874	206023_at	-1.69528	2.7517	1.05835	2.41953	-1.54053	7.03011	173.524	8.33547e-09	8.20899e-06
AF105974	hemoglobin, alpha 1 /// hemoglobin, alpha 2	HBA1 /// HBA2		209458_x_at	-0.64426	-1.30337	5.61979	-1.64987	-1.5679	7.42222	173.15	8.41747e-09	8.20899e-06
D00943	myosin, heavy chain 6, cardiac muscle, alpha	MYH6	4624	214468_at	-1.38289	-1.25002	3.44539	1.62395	-1.57999	6.70787	169.706	9.22033e-09	8.3618e-06
BE783065	small nuclear ribonucleoprotein polypeptide N	SNRPN	6638	226587_at	-2.2129	4.13173	-0.169509	2.50098	-0.718659	8.371	169.225	9.33971e-09	8.3618e-06
AF229180	aminoadipate-semialdehyde synthase	AASS	10157	210852_s_at	-2.23131	4.36351	-0.819914	0.691426	0.862465	7.22191	160.592	1.18416e-08	9.30287e-06
Z98443	WD repeat domain 72	WDR72	256764	227174_at	-1.63437	2.78521	0.0229866	4.14228	-2.07088	5.92081	153.912	1.43546e-08	1.0394e-05
AL365406	zinc finger RNA binding protein 2	ZFR2	23217	233064_at	-0.903972	1.52361	0.211127	2.61409	-1.48738	6.09798	145.248	1.86586e-08	1.2131e-05
AF349114	hemoglobin, beta	HBB	3043	211696_x_at	-0.369083	-0.593281	3.07031	-1.03749	-0.788368	6.7846	139.966	2.20617e-08	1.29597e-05
NM_152573	RAS and EF-hand domain containing	RASEF	158158	1553185_at	-1.42592	2.67325	0.576053	2.0931	-1.24459	9.13909	135.29	2.57246e-08	1.37735e-05
AI693153	gamma-aminobutyric acid (GABA) A receptor, beta 3	GABRB3	2562	229724_at	-1.12868	4.45728	-0.0666263	2.12958	-1.73238	5.46131	130.468	3.03067e-08	1.49485e-05
N90755	CAP, adenylate cyclase-associated protein, 2 (yeast)	CAP2	10486	212554_at	-2.60667	-0.278873	-0.640386	1.48483	2.13666	7.46644	130.39	3.03884e-08	1.49485e-05
M25079	hemoglobin, beta	HBB	3043	209116_x_at	-0.439412	-1.17801	4.01856	-1.18419	-1.05749	5.97071	130.02	3.07817e-08	1.49485e-05
NM_017489	telomeric repeat binding factor (NIMA-interacting) 1	TERF1	7013	203449_s_at	-1.75175	3.57512	-0.644977	1.53614	-0.0340625	9.0695	127.527	3.35926e-08	1.57084e-05
AB002438	sema domain, transmembrane domain (TM), and cytoplasmic domain, (semaphorin) 6A	SEMA6A	57556	215028_at	-2.00825	3.56135	-0.868491	3.35716	-0.837976	6.51481	127.048	3.4169e-08	1.57084e-05
AB015228	aldehyde dehydrogenase 1 family, member A2	ALDH1A2	8854	207016_s_at	0.0217393	-1.21904	3.7306	-1.34005	-1.20909	6.31166	126.797	3.44744e-08	1.57084e-05
AW007080	interleukin 17 receptor D	IL17RD	54756	227997_at	-1.30774	1.96887	0.953782	2.97426	-1.96725	8.4603	119.221	4.55195e-08	1.77203e-05
AI357639	---	---		225716_at	-2.53978	-0.138266	-1.02375	1.26999	2.42171	7.92863	119.088	4.57502e-08	1.77203e-05
NM_000851	glutathione S-transferase mu 5	GSTM5	2949	205752_s_at	0.69193	0.0516205	2.10021	-1.36651	-1.19827	6.81273	118.67	4.64809e-08	1.78765e-05
AI803485	URB1 ribosome biogenesis 1 homolog (S. cerevisiae)	URB1	9875	212996_s_at	-1.68661	0.822847	-0.644483	0.925008	1.22531	6.80531	118.085	4.75279e-08	1.80253e-05
AI969945	Phospholamban	PLN	5350	228202_at	-0.646529	-0.932433	4.16719	-1.11519	-1.07732	4.30727	116.862	4.98112e-08	1.84097e-05
NM_000559	hemoglobin, gamma A /// hemoglobin, gamma G	HBG1 /// HBG2		204848_x_at	-0.832387	-1.97677	5.89615	-1.69021	-1.31265	7.46197	113.141	5.76277e-08	1.91598e-05
AV720650	family with sequence similarity 169, member A	FAM169A	26049	235048_at	-2.66438	2.2212	-0.693948	2.35178	0.81876	7.87817	111.861	6.06578e-08	1.96018e-05
NM_000633	B-cell CLL/lymphoma 2	BCL2	596	203685_at	-0.981839	-1.62887	2.93942	-1.07478	0.281708	5.92003	111.413	6.17639e-08	1.9836e-05
NM_000258	myosin, light chain 3, alkali; ventricular, skeletal, slow	MYL3	4634	205589_at	-0.00999055	-0.618211	3.28061	-1.12927	-1.21817	7.05514	110.176	6.49484e-08	2.02965e-05
H17038	ubiquitin-conjugating enzyme E2Q family-like 1	UBE2QL1	134111	226612_at	-0.710794	0.624782	1.44421	1.7624	-1.63521	5.92031	110.046	6.52952e-08	2.02965e-05
U00954	UDP-glucose pyrophosphorylase 2	UGP2	7360	232180_at	-0.980023	4.55037	0.119065	1.62774	-1.70131	6.40437	109.865	6.57807e-08	2.02965e-05
NM_000184	hemoglobin, gamma A /// hemoglobin, gamma G	HBG1 /// HBG2		204419_x_at	-1.03662	-1.83904	6.3165	-1.62994	-1.47474	7.30417	109.009	6.81362e-08	2.0334e-05
AW974812	---	---		222325_at	-1.4514	2.8969	-0.209118	3.50077	-1.70866	5.09348	107.08	7.38367e-08	2.13357e-05
AW129056	hypothetical LOC57235	KIAA0485	57235	214295_at	-0.532676	-0.457154	2.39141	0.347217	-1.14069	4.76991	106.619	7.52838e-08	2.14139e-05
NM_016599	myozenin 2	MYOZ2	51778	207148_x_at	-0.240741	-0.733202	3.77057	-1.13746	-1.27026	4.98158	105.469	7.90459e-08	2.1478e-05
BF057809	---	---		237911_at	-1.19913	6.85939	1.8199	-1.11494	-1.5573	5.16607	105.426	7.91908e-08	2.1478e-05
AF349571	hemoglobin, alpha 1 /// hemoglobin, alpha 2	HBA1 /// HBA2		211699_x_at	-0.501883	-1.23593	4.83279	-1.45784	-1.33611	7.39814	105.397	7.92908e-08	2.1478e-05
AA491949	---	---		241897_at	-0.614419	3.63738	0.625422	2.67725	-2.79982	6.7671	105.355	7.94332e-08	2.1478e-05
BF111626	centromere protein N	CENPN	55839	228559_at	-1.95383	0.779891	-0.617429	2.10058	0.705106	7.1779	105.176	8.0041e-08	2.1478e-05
H57111	---	---		242343_x_at	-1.30631	2.18425	1.80053	1.30359	-1.49119	7.14794	103.674	8.5389e-08	2.25283e-05
AI133353	hemoglobin, gamma A /// hemoglobin, gamma G	HBG1 /// HBG2		213515_x_at	-1.17183	-1.61096	7.76371	-2.2356	-1.97658	6.57007	102.954	8.81067e-08	2.30404e-05
M32721	poly (ADP-ribose) polymerase 1	PARP1	142	208644_at	-1.86734	1.73908	-0.795476	1.84498	0.587974	9.77903	102.346	9.04814e-08	2.31751e-05
AF020769	troponin C type 1 (slow)	TNNC1	7134	209904_at	-0.608703	-0.601388	2.66239	-0.195612	-0.835351	5.7477	102.158	9.12354e-08	2.31751e-05
AI650353	dachshund homolog 1 (Drosophila)	DACH1	1602	228915_at	-1.23415	-1.89513	2.0491	-2.4422	2.12792	6.428	99.1025	1.04569e-07	2.52691e-05
AL832146	---	---		1562235_s_at	-0.818102	2.84813	1.15555	1.26336	-1.74388	5.35794	98.9849	1.05128e-07	2.52923e-05
BF724206	---	---		244457_at	-0.721085	1.34099	0.572609	2.1862	-1.56512	6.38137	98.3114	1.084e-07	2.58519e-05
BF342661	microtubule-associated protein 2	MAP2	4133	225540_at	-0.680975	-2.34956	0.872392	-2.16715	2.32733	7.23257	97.5123	1.12446e-07	2.64699e-05
AA572726	---	---		244610_x_at	-0.753669	2.11974	0.320764	1.65537	-1.27033	5.15428	96.9682	1.15306e-07	2.70267e-05
AK000106	---	---		232541_at	0.372115	-0.434803	1.75881	0.931783	-2.02091	5.59966	96.1857	1.19577e-07	2.71697e-05
R43158	fragile X mental retardation, autosomal homolog 1	FXR1	8087	230201_at	-2.03431	2.23342	-0.606756	1.54159	0.666615	6.66802	94.8098	1.27562e-07	2.77729e-05
AW182455	sideroflexin 4	SFXN4	119559	225143_at	-1.74534	-0.251411	-0.0886933	-0.282897	2.07687	8.04884	94.5935	1.28876e-07	2.78194e-05
BF593263	Na+/K+ transporting ATPase interacting 4	NKAIN4	128414	228017_s_at	-0.596835	0.252368	2.64962	0.591491	-1.64803	6.19817	93.4492	1.36106e-07	2.90358e-05
BF939176	myozenin 2	MYOZ2	51778	213782_s_at	-0.223681	-1.02484	4.42604	-1.50834	-1.37984	5.09397	92.8672	1.39973e-07	2.95979e-05
AI224133	---	---		228623_at	-0.235632	2.09773	1.27113	1.15303	-2.07972	6.25051	92.4358	1.42926e-07	2.98045e-05
BF059748	glucosaminyl (N-acetyl) transferase 2, I-branching enzyme (I blood group)	GCNT2	2651	230788_at	-1.45024	4.6527	-0.180517	2.88635	-1.90454	6.92845	91.6841	1.48255e-07	3.05533e-05
NM_014321	origin recognition complex, subunit 6	ORC6	23594	219105_x_at	-1.86082	1.68558	-0.446645	1.25386	0.760818	9.41436	91.0755	1.52747e-07	3.12434e-05
AL533838	tubulin, beta 2B	TUBB2B	347733	214023_x_at	-0.876936	4.26528	1.07225	2.95573	-3.23015	8.56065	90.8826	1.54205e-07	3.1424e-05
NM_007309	diaphanous homolog 2 (Drosophila)	DIAPH2	1730	205603_s_at	-2.43538	2.22823	-1.31808	3.51886	0.225455	7.52133	87.581	1.82006e-07	3.53734e-05
AW513477	zinc finger protein 721	ZNF721	170960	228029_at	-1.81246	2.48717	0.336106	1.3584	-0.146266	8.22995	87.3774	1.83912e-07	3.54912e-05
NM_014875	kinesin family member 14	KIF14	9928	206364_at	-2.34657	1.36082	-1.17903	2.65378	0.909793	7.88653	86.608	1.9134e-07	3.66655e-05
AW296451	---	---		241681_at	0.0355729	0.84504	1.83201	0.159985	-1.64525	6.21799	86.5048	1.92363e-07	3.67326e-05
NM_001905	CTP synthase	CTPS	1503	202613_at	-2.65458	0.281853	-0.561421	1.8477	1.70311	8.26604	86.1715	1.95716e-07	3.71133e-05
NM_006741	protein phosphatase 1, regulatory (inhibitor) subunit 1A	PPP1R1A	5502	205478_at	-0.780466	-0.251697	0.955909	2.60304	-1.50827	5.97979	85.9638	1.97841e-07	3.72575e-05
N32872	PRP38 pre-mRNA processing factor 38 (yeast) domain containing B	PRPF38B	55119	230270_at	-1.7827	1.89401	0.388226	1.02085	0.211973	6.88273	84.9768	2.08332e-07	3.81097e-05
BF223193	X (inactive)-specific transcript (non-protein coding)	XIST	7503	224589_at	-0.280352	-0.538702	2.24186	-0.676804	-0.583454	3.86269	82.0124	2.4418e-07	4.27416e-05
BF062139	polymerase (RNA) III (DNA directed) polypeptide G (32kD)	POLR3G	10622	206653_at	-2.43753	2.5564	-1.41691	2.35534	0.959781	6.30184	81.7193	2.48118e-07	4.32922e-05
AA045257	Pentatricopeptide repeat domain 3	PTCD3	55037	228590_at	-1.97433	0.77716	-0.488332	1.82145	0.826533	7.34385	80.2702	2.68765e-07	4.56033e-05
X79857	troponin T type 2 (cardiac)	TNNT2	7139	215389_s_at	-0.445333	-0.855166	3.5428	-0.309076	-1.42543	7.00816	79.441	2.81522e-07	4.7307e-05
NM_025057	chromosome 14 open reading frame 45	C14orf45	80127	220173_at	0.333578	-0.449707	1.83657	-1.45424	-0.438563	5.49481	79.3087	2.83625e-07	4.73539e-05
N23651	sidekick homolog 2 (chicken)	SDK2	54549	242064_at	-0.450099	0.68982	1.40996	1.19789	-1.51841	6.00513	79.1281	2.86527e-07	4.73539e-05
NM_000366	tropomyosin 1 (alpha)	TPM1	7168	206117_at	-1.6577	1.71243	2.98839	0.215689	-1.04916	8.44208	78.7846	2.92145e-07	4.76267e-05
AK026487	G kinase anchoring protein 1	GKAP1	80318	234192_s_at	-1.74887	-0.468511	-0.131872	2.20073	0.525805	6.6823	76.677	3.29724e-07	5.04477e-05
AI802048	unc-5 homolog D (C. elegans)	UNC5D	137970	231325_at	-1.53536	4.01872	0.572146	1.8308	-1.40618	6.18957	76.0294	3.42434e-07	5.12366e-05
AA824298	Zwilch, kinetochore associated, homolog (Drosophila)	ZWILCH	55055	222606_at	-1.93893	2.16907	-0.521092	1.61196	0.488661	9.00525	75.6826	3.49488e-07	5.15853e-05
NM_000257	myosin, heavy chain 6, cardiac muscle, alpha /// myosin, heavy chain 7, cardiac muscle, beta	MYH6 /// MYH7		204737_s_at	-0.930717	-1.45664	4.52058	0.302122	-1.79887	5.98444	75.2176	3.59224e-07	5.28795e-05
BG290193	zinc finger protein 703	ZNF703	80139	222760_at	0.16561	-0.86336	2.34019	-0.269666	-1.25817	6.7371	74.4857	3.75225e-07	5.4685e-05
AK024881	---	---		234723_x_at	-1.73325	1.5906	2.12144	1.16739	-0.989504	8.18869	74.0813	3.8444e-07	5.51062e-05
AW450929	hypothetical LOC100506653	LOC100506653	100506653	221919_at	-2.05002	0.965996	-0.830505	1.79722	1.08354	7.27627	73.946	3.87585e-07	5.54114e-05
NM_012321	LSM4 homolog, U6 small nuclear RNA associated (S. cerevisiae)	LSM4	25804	202737_s_at	-1.90498	1.09369	-0.734138	1.23671	1.20537	9.67108	73.8504	3.89826e-07	5.54416e-05
AA603590	zinc finger protein 682	ZNF682	91120	242915_at	-1.60832	4.80351	0.369457	2.05517	-1.60927	6.5124	73.4262	3.99959e-07	5.58321e-05
NM_002539	ornithine decarboxylase 1	ODC1	4953	200790_at	-2.04023	0.493076	-0.0300586	-0.316049	2.10661	10.3063	73.3235	4.02461e-07	5.58321e-05
AI365263	developmental pluripotency associated 5	DPPA5	340168	241550_at	-0.494231	5.75727	1.05627	-1.40181	-1.1945	5.01247	72.9439	4.11875e-07	5.62343e-05
NM_000436	3-oxoacid CoA transferase 1	OXCT1	5019	202780_at	-1.77625	-0.443266	-0.760702	-0.62976	2.85098	8.15899	72.2292	4.30333e-07	5.74039e-05
D32051	phosphoribosylglycinamide formyltransferase, phosphoribosylglycinamide synthetase, phosphoribosylaminoimidazole synthetase	GART	2618	210005_at	-2.29526	1.1942	-1.17506	1.72749	1.5289	6.63842	71.8833	4.39629e-07	5.76028e-05
BE464483	lipase maturation factor 1	LMF1	64788	227984_at	0.191102	-1.07446	1.98131	0.0177856	-1.16568	5.13337	71.5571	4.48623e-07	5.76028e-05
AU145411	fibroblast growth factor receptor 1	FGFR1	2260	222164_at	-1.22116	0.563339	-0.101374	2.92504	-0.849062	6.99286	71.5244	4.49536e-07	5.76028e-05
AF336127	solute carrier family 4, sodium borate transporter, member 11	SLC4A11	83959	223748_at	-2.21798	1.97549	-0.748922	1.44006	1.09872	7.80903	71.4008	4.53008e-07	5.76028e-05
BC037816	---	---		1562828_at	-1.27802	3.45039	0.610307	2.18882	-1.73819	5.53941	71.1601	4.59869e-07	5.76028e-05
AW205632	---	---		238156_at	-1.76372	2.25075	-0.256353	1.50764	0.179282	7.69626	70.7905	4.70649e-07	5.819e-05
AI637733	---	---		241509_at	-0.840361	2.52547	0.731664	1.00117	-1.15669	4.54707	70.6892	4.73658e-07	5.83925e-05
AI769688	ATPase, aminophospholipid transporter (APLT), class I, type 8A, member 1	ATP8A1	10396	213106_at	-1.71426	0.469404	-0.194622	-0.127329	1.77242	7.6599	70.473	4.80156e-07	5.90602e-05
NM_003158	aurora kinase A	AURKA	6790	208079_s_at	-2.41715	1.61625	-0.516025	2.14566	0.791976	9.10724	70.0711	4.92531e-07	5.99078e-05
AA533080	---	---		232835_at	-0.330159	2.77505	0.787198	1.2881	-1.97839	7.56459	69.1501	5.22378e-07	6.21426e-05
NM_000231	sarcoglycan, gamma (35kDa dystrophin-associated glycoprotein)	SGCG	6445	207302_at	-0.173283	-0.565969	2.54643	-0.505017	-0.999001	5.61107	69.1039	5.23935e-07	6.21426e-05
AI743156	kelch-like 31 (Drosophila)	KLHL31	401265	239398_at	-0.358463	-0.120635	2.89854	-0.914698	-0.923885	4.48506	69.1036	5.23945e-07	6.21426e-05
AI963203	solute carrier family 7 (cationic amino acid transporter, y+ system), member 3	SLC7A3	84889	230597_at	-2.1978	4.41709	-0.275929	3.60484	-1.49384	8.28262	68.8194	5.33631e-07	6.29287e-05
NM_003384	vaccinia related kinase 1	VRK1	7443	203856_at	-2.67152	1.65641	-1.23752	1.66631	1.83352	8.05937	68.7701	5.35335e-07	6.29287e-05
AI571166	---	---		226848_at	-1.78917	0.981682	-0.0754173	1.14407	0.74951	7.05453	68.4057	5.48128e-07	6.39635e-05
BC030758	chromosome 22 open reading frame 39	C22orf39	128977	1553974_at	-1.86253	-0.589822	-0.645235	1.23613	1.66521	6.56831	68.0695	5.60262e-07	6.45519e-05
BF057073	---	---		231310_at	-2.1554	5.11101	0.954382	4.60485	-3.25443	8.14688	67.8712	5.67573e-07	6.4935e-05
AL558875	hypothetical LOC100506168 /// splicing factor proline/glutamine-rich	LOC100506168 /// SFPQ		214016_s_at	-1.45573	1.48095	1.31897	1.38059	-0.837622	10.0393	67.6554	5.75661e-07	6.51099e-05
AI184988	fibrillin 3	FBN3	84467	240117_at	-0.521919	0.891106	1.89815	0.161723	-1.14837	6.83477	67.4996	5.81585e-07	6.53541e-05
AB014567	cullin-associated and neddylation-dissociated 2 (putative)	CAND2	23066	213547_at	-1.4651	0.647515	0.688693	0.879057	0.204099	8.27867	65.8686	6.48316e-07	6.92886e-05
NM_001771	CD22 molecule	CD22	933	204581_at	0.0736203	-0.45239	1.80597	-0.756295	-0.622604	5.30221	65.2201	6.77415e-07	7.10089e-05
NM_003970	myomesin (M-protein) 2, 165kDa	MYOM2	9172	205826_at	-0.236349	-0.531355	2.17291	-0.945845	-0.404579	5.86538	64.4155	7.15767e-07	7.25831e-05
NM_006170	NOP2 nucleolar protein homolog (yeast)	NOP2	4839	214427_at	-1.60877	0.0848853	-0.166266	1.70716	0.553212	8.21133	64.3365	7.19677e-07	7.25831e-05
AL044326	phosphoribosylformylglycinamidine synthase	PFAS	5198	213302_at	-2.78312	1.77757	-0.824935	0.76459	2.23082	8.19102	64.1146	7.30788e-07	7.28294e-05
AB051550	contactin associated protein-like 4	CNTNAP4	85445	232388_at	0.515793	-0.64841	1.96145	-1.63703	-0.515939	6.95583	63.897	7.41888e-07	7.36668e-05
NM_004553	NADH dehydrogenase (ubiquinone) Fe-S protein 6, 13kDa (NADH-coenzyme Q reductase)	NDUFS6	4726	203606_at	-1.57457	0.893996	0.294521	0.0923762	1.01864	11.1194	62.7607	8.03306e-07	7.68634e-05
AF020768	myosin, light chain 2, regulatory, cardiac, slow	MYL2	4633	209742_s_at	-0.187827	-1.01098	3.41085	-1.0677	-1.03728	5.85769	62.7465	8.0411e-07	7.68634e-05
AL046017	family with sequence similarity 46, member C	FAM46C	54855	226811_at	-0.537855	-0.617994	0.784978	2.74351	-1.60847	6.11322	62.6129	8.11739e-07	7.70983e-05
AA156723	vesicle amine transport protein 1 homolog (T. californica)-like	VAT1L	57687	226415_at	-0.303927	2.10091	1.15417	2.19284	-2.62772	6.58918	62.5147	8.17404e-07	7.75015e-05
NM_022346	non-SMC condensin I complex, subunit G	NCAPG	64151	218662_s_at	-2.73593	0.978664	-0.522732	2.2772	1.24006	8.16915	62.3639	8.262e-07	7.79297e-05
AI242023	---	---		240458_at	-0.826673	1.4349	0.689495	1.50144	-1.11225	5.47499	62.0679	8.43796e-07	7.81055e-05
AI144007	heterogeneous nuclear ribonucleoprotein A1 /// hypothetical LOC100506653	HNRNPA1 /// LOC100506653		222040_at	-1.60492	0.612569	-0.43482	2.28819	0.165151	7.53009	61.807	8.59688e-07	7.8947e-05
AB011100	KIAA0528	KIAA0528	9847	212943_at	-1.76685	0.758251	-0.426031	2.1219	0.383525	9.35137	61.8001	8.60115e-07	7.8947e-05
NM_021951	doublesex and mab-3 related transcription factor 1	DMRT1	1761	220493_at	-0.210961	-0.93514	1.7649	0.373033	-0.902615	4.52632	61.7369	8.64021e-07	7.90398e-05
AL137578	EMX2 opposite strand (non-protein coding)	EMX2OS	196047	232531_at	0.464352	-1.27782	3.59385	-1.49473	-1.43783	6.03036	61.1183	9.03417e-07	8.13259e-05
AI347136	telomeric repeat binding factor (NIMA-interacting) 1	TERF1	7013	203448_s_at	-2.08555	3.79579	-0.439345	1.59898	0.0472003	8.89054	61.1109	9.03903e-07	8.13259e-05
BF223023	hypothetical LOC790952	ESRG	790952	231381_at	-2.19643	5.62383	1.46634	4.82711	-3.87381	7.90733	61.0305	9.09185e-07	8.14371e-05
W92748	sema domain, transmembrane domain (TM), and cytoplasmic domain, (semaphorin) 6A	SEMA6A	57556	225660_at	-1.63628	3.67148	0.312445	2.24142	-1.29012	8.98583	60.6783	9.32777e-07	8.26977e-05
N21426	synaptotagmin-like 2	SYTL2	54843	225496_s_at	-0.288125	0.36224	0.723038	1.78721	-1.50612	6.28951	60.6552	9.34345e-07	8.27024e-05
BE644917	X (inactive)-specific transcript (non-protein coding)	XIST	7503	224590_at	-0.424187	-0.587075	2.66741	-0.757449	-0.65343	3.80717	60.3732	9.53818e-07	8.40175e-05
NM_024622	FAST kinase domains 1	FASTKD1	79675	219002_at	-1.98501	1.38857	-0.405719	1.76	0.619301	8.83394	60.3164	9.578e-07	8.40724e-05
BC001811	RRS1 ribosome biogenesis regulator homolog (S. cerevisiae)	RRS1	23212	209567_at	-1.99456	0.840088	-0.782375	1.08043	1.51582	8.73346	60.3148	9.57906e-07	8.40724e-05
NM_005756	G protein-coupled receptor 64	GPR64	10149	206002_at	-0.980182	2.32636	1.57072	0.909357	-1.44865	5.8629	60.1196	9.71745e-07	8.4641e-05
AA524609	---	---		1559410_at	-1.15338	3.79145	0.0752127	2.13257	-1.58229	5.46662	60.0088	9.79706e-07	8.47896e-05
AK000776	receptor tyrosine kinase-like orphan receptor 1	ROR1	4919	232060_at	-1.15914	2.1366	0.0795199	3.08883	-1.66529	5.48549	59.9671	9.82727e-07	8.47896e-05
AK001419	feline leukemia virus subgroup C cellular receptor 1	FLVCR1	28982	222906_at	-2.44286	2.87218	-1.27882	1.95542	1.0344	7.46168	59.8439	9.91705e-07	8.5262e-05
BF447901	SH3-binding domain kinase 1	SBK1	388228	226549_at	-0.92041	1.55113	0.129965	1.18499	-0.473272	7.23702	59.451	1.02102e-06	8.63175e-05
NM_003319	titin	TTN	7273	208195_at	-0.933515	0.560344	4.77542	-0.363244	-2.19472	7.22632	59.2751	1.03449e-06	8.63864e-05
AV706522	protein phosphatase, Mg2+/Mn2+ dependent, 1K	PPM1K	152926	235061_at	-1.6743	0.126755	-0.46777	-0.459448	2.25019	6.96974	58.9136	1.06285e-06	8.80813e-05
AW205919	Platelet-derived growth factor alpha polypeptide	PDGFA	5154	229830_at	-0.934752	3.13202	0.375515	3.08626	-2.41711	6.21172	58.8402	1.06873e-06	8.81667e-05
NM_024674	lin-28 homolog A (C. elegans)	LIN28A	79727	219823_at	-2.07915	5.37482	0.457485	5.40535	-3.62101	7.11576	58.6658	1.08284e-06	8.88706e-05
N50034	myelin expression factor 2	MYEF2	50804	229464_at	-2.18171	0.65557	-1.12409	2.05371	1.34344	7.28149	58.4125	1.10375e-06	8.9302e-05
AF139625	centromere protein J	CENPJ	55835	223513_at	-2.55352	0.493535	-1.45411	0.940352	2.73152	8.02576	58.3814	1.10635e-06	8.93805e-05
BE468066	rhabdomyosarcoma 2 associated transcript (non-protein coding)	RMST	196475	229782_at	-1.3992	4.14791	0.291063	3.62768	-2.59593	6.39031	58.1554	1.12548e-06	8.94789e-05
AW262311	---	---		231628_s_at	0.438944	-1.30602	1.78273	-4.86519	2.05136	8.50633	58.151	1.12585e-06	8.94789e-05
AA679589	exportin 7	XPO7	23039	240168_at	-0.560323	1.77975	1.38924	0.0582415	-0.997915	4.65791	57.9357	1.14445e-06	9.04516e-05
AI480314	SRY (sex determining region Y)-box 6	SOX6	55553	227498_at	-0.650435	-1.71884	1.20074	-2.01119	1.76368	5.82362	57.4327	1.18939e-06	9.31943e-05
NM_005330	hemoglobin, epsilon 1	HBE1	3046	205919_at	-0.779626	-0.30468	4.73398	-1.4781	-1.2894	6.04755	57.0284	1.22708e-06	9.51816e-05
NM_003318	TTK protein kinase	TTK	7272	204822_at	-2.66844	1.82209	-0.545048	1.89838	1.15886	7.93093	56.9302	1.23646e-06	9.54504e-05
NM_024900	PHD finger protein 17	PHF17	79960	218517_at	-1.48357	3.03747	-0.316022	1.7449	-0.481508	9.0026	56.8657	1.24266e-06	9.54504e-05
NM_014788	tripartite motif-containing 14	TRIM14	9830	203148_s_at	-2.40722	0.838449	-1.28088	1.28113	2.12757	7.3229	56.7338	1.25546e-06	9.60285e-05
BC001605	phosphoribosyl pyrophosphate synthetase 1	PRPS1	5631	209440_at	-1.81096	1.5352	-0.784037	2.10203	0.42056	9.28265	56.162	1.31286e-06	9.77691e-05
N90191	cyclin B1	CCNB1	891	228729_at	-2.6461	2.15906	-0.98937	2.25047	1.08568	8.4148	55.8945	1.34081e-06	9.882e-05
AW131450	---	---		235513_at	-1.50967	0.931737	-0.376163	2.96555	-0.527162	6.67558	55.6048	1.3719e-06	9.98979e-05
AI677701	RNA binding motif protein 24	RBM24	221662	235004_at	-1.92429	-0.633181	0.0947707	1.0794	1.35256	7.20969	55.5246	1.38066e-06	0.000100167
NM_018082	polymerase (RNA) III (DNA directed) polypeptide B	POLR3B	55703	219459_at	-1.23647	0.838865	-0.145648	0.289154	0.861178	8.12242	55.2437	1.41189e-06	0.000101325
NM_002851	protein tyrosine phosphatase, receptor-type, Z polypeptide 1	PTPRZ1	5803	204469_at	-3.38962	3.80966	-1.34255	4.01326	0.33926	7.58351	55.2436	1.4119e-06	0.000101325
NM_005573	lamin B1	LMNB1	4001	203276_at	-2.76755	1.47278	-0.846897	0.831656	2.28678	7.76358	55.0563	1.43319e-06	0.000102315
AL157471	Fraser syndrome 1	FRAS1	80144	226145_s_at	-2.19333	2.00008	0.935306	-0.41541	1.18004	9.19407	55.0035	1.43927e-06	0.000102374
NM_004789	LIM homeobox 2	LHX2	9355	206140_at	-1.53098	-1.53016	2.14954	3.03594	-1.41596	5.73024	54.6651	1.47897e-06	0.000103819
AI267414	Zinc finger protein 518A	ZNF518A	9849	244132_x_at	-0.929021	2.05509	0.905256	1.11652	-1.10386	5.74912	54.6306	1.48308e-06	0.000103974
NM_013453	sperm protein associated with the nucleus, X-linked, family member A1 /// SPANX family, member A2 /// SPANX family, member B1 /// SPANX family, member B2 /// SPANX family, member C /// SPANX family, member F1	SPANXA1 /// SPANXA2 /// SPANXB1 /// SPANXB2 /// SPANXC /// SPANXF1		220922_s_at	-0.0267632	-0.264504	2.57261	-1.03424	-0.910647	5.9789	54.4452	1.50547e-06	0.000104594
AI742383	---	---		240231_at	-1.2228	2.52856	0.270504	2.45195	-1.43501	5.59483	54.3043	1.52276e-06	0.000104791
NM_006633	IQ motif containing GTPase activating protein 2	IQGAP2	10788	203474_at	-1.22835	3.09562	0.146212	2.37884	-1.48689	6.09645	53.7088	1.59856e-06	0.000106655
AB033026	pleckstrin homology domain containing, family H (with MyTH4 domain) member 1	PLEKHH1	57475	225726_s_at	-1.89842	1.7629	-0.0231117	1.16735	0.547963	7.24745	53.615	1.6109e-06	0.000106655
AI911518	G patch domain containing 4	GPATCH4	54865	224634_at	-2.22012	1.21085	-0.808914	1.22398	1.5398	7.62872	52.8885	1.71063e-06	0.000110724
AI125646	zinc finger protein 207	ZNF207	7756	228157_at	-1.6973	2.14542	-0.330181	0.802475	0.667295	7.61846	52.7526	1.73011e-06	0.000111079
AK021441	---	---		232347_x_at	-0.987785	1.76205	0.357448	0.69986	-0.304435	7.08865	52.615	1.75011e-06	0.000111079
W86781	---	---		222366_at	-0.878917	2.7706	1.97225	0.210929	-1.50007	6.30588	52.4827	1.7696e-06	0.000111205
T97717	Proteasome (prosome, macropain) activator subunit 4	PSME4	23198	237180_at	-0.903597	2.52959	0.864376	1.22011	-1.32926	6.53076	52.0916	1.82881e-06	0.000113417
AA993566	---	---		239597_at	-1.06911	3.32435	1.3828	1.83806	-2.18625	6.71912	51.7687	1.87952e-06	0.000115592
NM_001824	creatine kinase, muscle	CKM	1158	204810_s_at	-0.375575	-0.669172	3.52719	-1.06137	-1.04525	5.35578	51.6802	1.89371e-06	0.000116222
AI149880	---	---		242688_at	-0.613987	1.34561	0.68731	1.63648	-1.38374	6.71802	51.6783	1.89401e-06	0.000116222
AI524125	protocadherin 9	PCDH9	5101	219737_s_at	0.142857	-1.24669	2.14819	-2.32172	0.388394	6.78093	51.5961	1.90732e-06	0.000116723
BE503800	DEAD (Asp-Glu-Ala-Asp) box polypeptide 31	DDX31	64794	235436_at	-1.83747	0.856353	-0.833996	1.08848	1.38236	6.0769	51.2069	1.97187e-06	0.000118256
AK023446	aminoadipate-semialdehyde synthase	AASS	10157	214829_at	-2.61541	3.52777	-0.581673	1.26193	0.98598	7.30258	51.1285	1.98519e-06	0.000118618
AI366784	TAF4b RNA polymerase II, TATA box binding protein (TBP)-associated factor, 105kDa	TAF4B	6875	235020_at	-2.02235	1.52445	-0.654393	0.613595	1.5414	6.92516	51.0606	1.99681e-06	0.000118645
AA608834	---	---		242068_at	-0.697883	2.22308	1.55604	0.692671	-1.54228	5.49528	51.0456	1.99939e-06	0.000118645
AL120375	ring finger protein, transmembrane 2	RNFT2	84900	221908_at	-1.30895	1.08517	-0.0164091	1.44787	-0.00707864	7.14807	50.9321	2.01905e-06	0.000119207
NM_153224	hypothetical protein MGC34034	MGC34034	154089	1552899_at	-0.30009	-0.216545	1.88114	-0.45809	-0.57643	4.15315	50.9125	2.02247e-06	0.000119247
AW070371	STT3, subunit of the oligosaccharyltransferase complex, homolog B (S. cerevisiae)	STT3B	201595	238303_at	-0.52983	1.65388	0.889235	0.493846	-0.943516	4.8455	50.5939	2.07902e-06	0.000120651
NM_006342	transforming, acidic coiled-coil containing protein 3	TACC3	10460	218308_at	-1.60009	1.61848	-0.487149	1.48034	0.398464	7.85142	50.5769	2.0821e-06	0.000120651
AA814383	---	---		236924_at	-1.29831	1.84578	-0.249705	2.62812	-0.902558	5.71063	50.3657	2.12071e-06	0.000121786
AU155565	choroideremia-like (Rab escort protein 2)	CHML	1122	226350_at	-2.36192	2.07287	-0.785836	0.678072	1.7428	9.09227	50.0974	2.17104e-06	0.000122867
AA648521	splicing factor, arginine/serine-rich 15	SFRS15	57466	222310_at	-1.77003	1.33048	0.790511	2.13281	-0.622348	6.42998	50.0194	2.18595e-06	0.000123073
AI084451	---	---		1559391_s_at	-1.53806	2.3526	0.495286	2.11126	-0.983839	6.01356	49.5398	2.28039e-06	0.0001263
NM_001100	actin, alpha 1, skeletal muscle	ACTA1	58	203872_at	-0.959104	2.5537	2.06124	-0.91165	-0.65852	6.00986	49.381	2.31273e-06	0.000127101
AF098306	sperm protein associated with the nucleus, X-linked, family member A1 /// SPANX family, member A2 /// SPANX family, member C	SPANXA1 /// SPANXA2 /// SPANXC		224032_x_at	0.0830592	-0.36761	1.55437	-0.519012	-0.650762	5.28716	49.2994	2.32958e-06	0.000127353

## Sheet: 4.UpEGCvs.PGC
Representative Public ID	Gene Title	Gene Symbol	Entrez Gene	ID	EGCvsREF	ESCvsREF	PGCvsREF	ECCvsREF	IPSCvsREF	AveExpr	F	P.Value	adj.P.Val
NM_004369	collagen, type VI, alpha 3	COL6A3	1293	201438_at	3.96864	0.550495	2.24741	-2.04126	-4.28957	9.08593	242.341	1.82645e-09	4.63466e-06
AW025579	bicaudal C homolog 1 (Drosophila)	BICC1	80114	213429_at	1.31614	-2.90803	-0.915772	-2.53734	1.95528	7.16207	163.515	1.09122e-08	9.0991e-06
AA788711	collagen, type I, alpha 2	COL1A2	1278	202403_s_at	2.53331	-0.329125	1.52473	-4.35204	-0.538718	11.2965	139.398	2.24713e-08	1.29597e-05
AB033025	KIAA1199	KIAA1199	57214	212942_s_at	2.75203	0.0442433	0.246758	-1.75703	-1.75994	5.86303	138.884	2.28494e-08	1.29597e-05
NM_001008	ribosomal protein S4, Y-linked 1	RPS4Y1	6192	201909_at	1.51257	1.70994	-1.07068	-5.83475	2.52106	10.5364	134.467	2.64431e-08	1.38829e-05
NM_002526	5'-nucleotidase, ecto (CD73)	NT5E	4907	203939_at	2.04315	-0.353553	0.573557	-1.3446	-1.41126	5.06611	129.54	3.12997e-08	1.49945e-05
NM_000358	transforming growth factor, beta-induced, 68kDa	TGFBI	7045	201506_at	2.07186	-3.41799	0.147807	-2.96562	0.946012	10.9767	115.067	5.34089e-08	1.86967e-05
BG285011	AT rich interactive domain 5B (MRF1-like)	ARID5B	84159	212614_at	1.38232	-2.43122	-0.223564	-2.65693	1.34841	8.51733	113.466	5.68882e-08	1.90603e-05
NM_017784	oxysterol binding protein-like 10	OSBPL10	114884	219073_s_at	0.271813	2.34584	-1.53573	1.64244	-1.1249	7.61674	110.132	6.50662e-08	2.02965e-05
NM_001423	epithelial membrane protein 1	EMP1	2012	201324_at	2.18038	-2.32751	0.193545	-4.2812	1.32056	8.41625	107.39	7.28831e-08	2.11721e-05
M14087	---	---		216405_at	3.16624	-5.06732	-0.671465	-5.80243	2.83879	10.3276	105.888	7.7649e-08	2.1478e-05
AA939270	importin 7	IPO7	10527	200993_at	-0.94619	0.887355	-2.3847	1.29151	1.3792	9.98863	102.545	8.96968e-08	2.31751e-05
NM_002318	lysyl oxidase-like 2	LOXL2	4017	202998_s_at	1.86766	0.961146	0.406808	1.21065	-3.26635	8.2225	96.5017	1.17829e-07	2.71195e-05
AA825563	---	---		239292_at	-0.331861	2.52401	-1.35291	2.32043	-1.15449	5.35251	94.7963	1.27643e-07	2.77729e-05
NM_014624	S100 calcium binding protein A6	S100A6	6277	217728_at	2.38396	-2.14947	-0.524653	-4.77904	1.86832	10.2364	92.9459	1.39442e-07	2.95979e-05
AF010316	prostaglandin E synthase	PTGES	9536	210367_s_at	2.76568	-0.795064	0.18375	-0.976877	-1.97191	7.76764	87.6351	1.81504e-07	3.53734e-05
U56725	heat shock 70kDa protein 2	HSPA2	3306	211538_s_at	2.07773	3.10445	-0.209868	0.377091	-3.22402	7.96378	85.4862	2.02835e-07	3.76783e-05
X02761	fibronectin 1	FN1	2335	212464_s_at	2.339	1.30382	0.828485	-0.59792	-2.92731	10.9783	85.2606	2.05247e-07	3.78688e-05
N30339	collagen, type V, alpha 1	COL5A1	1289	212488_at	2.68957	0.234588	0.836907	-0.786297	-2.80151	8.21026	83.0601	2.3071e-07	4.09633e-05
AF131749	seizure related 6 homolog (mouse)-like 2	SEZ6L2	26470	233337_s_at	0.783519	1.29605	-0.436415	1.40334	-1.86015	7.00676	82.4524	2.3841e-07	4.20008e-05
AF147445	---	---		1556824_at	2.40401	-3.06718	-0.228404	-3.44994	1.07061	8.70946	82.0657	2.43471e-07	4.27416e-05
AI628360	natriuretic peptide receptor C/guanylate cyclase C (atrionatriuretic peptide receptor C)	NPR3	4883	219789_at	2.23796	-0.932032	0.765248	-1.49467	-1.441	5.30186	81.3981	2.52523e-07	4.39204e-05
AL534095	wntless homolog (Drosophila)	WLS	79971	228950_s_at	1.01679	-3.22861	-1.88936	-1.36822	2.23114	7.56559	78.5291	2.96412e-07	4.78934e-05
AW007532	insulin-like growth factor binding protein 5	IGFBP5	3488	211959_at	3.33239	-3.64936	2.07397	-2.77318	-1.6498	9.40406	77.1249	3.21267e-07	4.97036e-05
NM_004270	mediator complex subunit 7	MED7	9443	204350_s_at	0.437261	0.333203	-2.44919	-0.0647942	1.12766	7.72518	76.3658	3.35758e-07	5.07943e-05
AF059752	mannose-P-dolichol utilization defect 1	MPDU1	9526	209208_at	-0.494802	-2.22574	-2.01895	0.61539	2.17242	7.53982	70.1112	4.91279e-07	5.99078e-05
N74607	aquaporin 3 (Gill blood group)	AQP3	360	39248_at	2.12889	0.432008	1.1017	-1.01152	-2.33301	7.68356	69.9824	4.95313e-07	6.01123e-05
BF438386	RAB27B, member RAS oncogene family	RAB27B	5874	228708_at	2.32409	-0.16367	-0.0660146	-0.586448	-1.83455	5.84054	68.316	5.51332e-07	6.4071e-05
NM_006773	DEAD (Asp-Glu-Ala-Asp) box polypeptide 18	DDX18	8886	205763_s_at	-0.886176	1.10615	-2.17488	1.25468	1.13093	7.4894	65.7461	6.53692e-07	6.97024e-05
NM_001657	amphiregulin	AREG	374	205239_at	3.81206	0.0859685	-0.336163	-2.39005	-2.02324	6.70636	65.7224	6.5474e-07	6.97024e-05
NM_004815	Rho GTPase activating protein 29	ARHGAP29	9411	203910_at	2.17796	0.782606	0.822253	0.930762	-3.60751	8.00215	65.3123	6.73183e-07	7.07883e-05
AU144571	RNA binding motif protein 26	RBM26	64062	229433_at	-0.561364	0.423489	-1.62852	0.975209	0.855743	6.27154	65.094	6.8326e-07	7.1076e-05
BC005954	NADH dehydrogenase (ubiquinone) Fe-S protein 7, 20kDa (NADH-coenzyme Q reductase)	NDUFS7	374291	211752_s_at	-0.376352	-0.48213	-1.63372	0.952204	0.991409	9.25006	64.8137	6.96465e-07	7.19018e-05
BC037257	---	---		1570382_at	1.70315	-0.772479	-0.354607	-1.16359	-0.433525	7.05149	64.5306	7.10124e-07	7.25258e-05
NM_020215	chromosome 14 open reading frame 132	C14orf132	56967	218820_at	1.17199	0.887658	0.121312	0.61328	-1.9576	8.35452	63.4972	7.62825e-07	7.50359e-05
BC003573	farnesyl-diphosphate farnesyltransferase 1	FDFT1	2222	210950_s_at	-0.883695	-0.175896	-2.38525	2.2967	1.00136	10.0792	63.0813	7.85368e-07	7.61835e-05
NM_017817	RAB20, member RAS oncogene family	RAB20	55647	219622_at	1.07717	1.3777	-0.156653	-0.280115	-1.24523	7.87141	62.7402	8.04467e-07	7.68634e-05
Y15521	acetylserotonin O-methyltransferase-like	ASMTL	8623	36554_at	-0.446312	2.47154	-1.69688	2.22088	-0.726867	7.75159	62.2524	8.32777e-07	7.81055e-05
AV699857	ribulose-5-phosphate-3-epimerase	RPE	6120	225039_at	-0.90565	0.608227	-2.00054	1.35765	1.1315	7.8104	62.1482	8.38979e-07	7.81055e-05
AI671186	peptidase domain containing associated with muscle regeneration 1	PAMR1	25891	213661_at	2.20755	0.813221	0.64777	-1.01189	-2.23588	7.42921	60.6963	9.31553e-07	8.26977e-05
T79568	regulation of nuclear pre-mRNA domain containing 1A	RPRD1A	55197	222558_at	-0.918381	0.00562418	-2.36828	1.15958	1.72231	6.22349	60.0691	9.75367e-07	8.47896e-05
AA045184	S100 calcium binding protein A16	S100A16	140576	227998_at	1.83235	-0.397154	0.415282	-0.632295	-1.55529	9.4426	59.7484	9.98735e-07	8.5262e-05
BE256479	heat shock 60kDa protein 1 (chaperonin)	HSPD1	3329	200806_s_at	-1.57589	-0.0557541	-3.03116	2.17086	2.168	10.4222	59.3747	1.02684e-06	8.63864e-05
AF130095	fibronectin 1	FN1	2335	210495_x_at	2.18546	1.07253	0.852418	-0.685397	-2.65432	11.3413	59.1671	1.04287e-06	8.6953e-05
AA526584	G protein-coupled receptor 176	GPR176	11245	227846_at	1.06032	2.33744	-0.203524	-0.251215	-1.53631	7.56434	58.2549	1.11701e-06	8.94789e-05
BG104571	transmembrane 9 superfamily member 3	TM9SF3	56889	222399_s_at	-0.109012	-0.0864085	-2.0072	0.0157725	1.46543	9.65047	58.1519	1.12577e-06	8.94789e-05
AK001782	CXXC finger protein 5	CXXC5	51523	233955_x_at	1.48933	0.156565	0.184998	0.525363	-2.0151	9.40518	57.7298	1.1626e-06	9.16205e-05
NM_006759	UDP-glucose pyrophosphorylase 2	UGP2	7360	205480_s_at	-0.141835	2.28037	-1.19249	1.07489	-0.539888	10.8039	57.5623	1.17762e-06	9.26702e-05
NM_018482	ArfGAP with SH3 domain, ankyrin repeat and PH domain 1	ASAP1	50807	221039_s_at	-0.356953	-1.19655	-1.97879	0.769195	1.5622	6.80995	57.5332	1.18024e-06	9.27394e-05
NM_003155	stanniocalcin 1	STC1	6781	204597_x_at	3.44224	0.633068	0.812167	-2.75169	-2.36025	7.2831	56.8736	1.24189e-06	9.54504e-05
NM_005566	lactate dehydrogenase A	LDHA	3939	200650_s_at	1.1176	-0.305912	-0.442282	-2.09102	0.673235	12.8038	56.5382	1.27474e-06	9.67227e-05
AI300520	stanniocalcin 1	STC1	6781	204595_s_at	3.14537	-0.173846	0.641071	-2.67551	-1.73113	8.69668	56.3247	1.29621e-06	9.77691e-05
M55905	malic enzyme 2, NAD(+)-dependent, mitochondrial	ME2	4200	210153_s_at	-0.768541	-0.478117	-1.86326	0.205162	2.03331	8.89539	56.2176	1.30714e-06	9.77691e-05
AI873304	---	---		241575_at	2.628	-2.02438	-1.47921	-2.17851	0.48527	5.81588	55.8322	1.34742e-06	9.91735e-05
BC005858	fibronectin 1	FN1	2335	211719_x_at	2.23895	1.16617	1.01877	-0.612484	-2.89853	11.2735	55.7446	1.35678e-06	9.93272e-05
NM_005504	branched chain amino-acid transaminase 1, cytosolic	BCAT1	586	214452_at	-1.25086	0.721822	-2.2733	2.63837	0.766876	5.82103	55.2034	1.41644e-06	0.000101517
NM_001415	eukaryotic translation initiation factor 2, subunit 3 gamma, 52kDa	EIF2S3	1968	205321_at	-1.18602	-0.017969	-2.33814	1.31909	1.87138	7.84915	54.4161	1.50903e-06	0.000104594
AA020826	cathepsin B	CTSB	1508	213274_s_at	2.07099	-0.161286	-0.0391378	-1.94436	-0.69489	7.33077	54.2718	1.52679e-06	0.000104791
NM_003659	alkylglycerone phosphate synthase	AGPS	8540	205401_at	-0.607675	1.37751	-1.65301	0.420402	0.970242	6.3303	54.1068	1.5474e-06	0.000105139
AF020589	cytochrome c oxidase subunit VIa polypeptide 1	COX6A1	1337	224344_at	3.09044	-4.44801	-0.814105	-4.60786	2.00687	9.2672	54.0882	1.54975e-06	0.000105139
BC029332	---	---		1570107_at	3.36917	-3.51921	-0.622126	-3.4118	0.493181	8.26671	54.003	1.56055e-06	0.000105478
W80678	v-Ki-ras2 Kirsten rat sarcoma viral oncogene homolog	KRAS	3845	204009_s_at	-0.5337	1.1994	-1.78831	1.79971	0.126298	10.0886	53.831	1.58264e-06	0.000106444
BG260087	coxsackie virus and adenovirus receptor	CXADR	1525	226374_at	-0.547666	1.97118	-1.55265	1.6788	-0.193493	9.85567	53.1867	1.66882e-06	0.000109399
NM_020300	microsomal glutathione S-transferase 1	MGST1	4257	231736_x_at	-1.30886	0.292268	-2.4971	2.02543	1.52589	10.9916	52.9185	1.70638e-06	0.000110724
NM_016139	coiled-coil-helix-coiled-coil-helix domain containing 2	CHCHD2	51142	217720_at	-0.192189	-2.15822	-1.33211	1.0326	1.11127	11.7129	52.8706	1.71318e-06	0.000110724
AA398590	PARK2 co-regulated-like	PACRGL	133015	235260_s_at	-0.59444	-0.706057	-1.65053	0.825936	1.37952	6.93947	52.8232	1.71996e-06	0.0001109
AK026737	fibronectin 1	FN1	2335	216442_x_at	2.30102	1.07622	0.866684	-0.774501	-2.72122	11.3097	52.6359	1.74705e-06	0.000111079
NM_004504	ArfGAP with FG repeats 1	AGFG1	3267	218092_s_at	-0.398244	1.01261	-1.89901	0.795011	0.796706	8.28584	52.5797	1.75529e-06	0.000111079
NM_003244	TGFB-induced factor homeobox 1	TGIF1	7050	203313_s_at	0.126761	1.39512	-1.58503	2.16557	-0.978826	8.88804	52.5385	1.76135e-06	0.000111205
AL050025	carbonic anhydrase XII	CA12	771	215867_x_at	2.15886	-0.64519	-0.946223	-0.333082	-1.09093	7.85421	50.8529	2.03291e-06	0.00011938
AI093579	integrin, alpha V (vitronectin receptor, alpha polypeptide, antigen CD51)	ITGAV	3685	202351_at	0.235965	-0.637064	-1.43268	-0.430431	1.21846	10.491	50.6287	2.07276e-06	0.000120651
NM_021913	AXL receptor tyrosine kinase	AXL	558	202686_s_at	1.8709	0.954177	-0.0186974	0.238727	-2.33564	8.15484	50.5965	2.07856e-06	0.000120651
U08839	plasminogen activator, urokinase receptor	PLAUR	5329	210845_s_at	1.96333	-0.580059	0.0074875	0.0456275	-1.80539	7.0732	50.5412	2.08856e-06	0.000120708
U15555	serine palmitoyltransferase, long chain base subunit 2	SPTLC2	9517	216202_s_at	0.332691	0.280282	-2.0073	-0.230352	1.06565	6.25724	49.7024	2.24782e-06	0.000124883
J03263	lysosomal-associated membrane protein 1	LAMP1	3916	201551_s_at	-0.629993	-0.921817	-1.6884	-0.0324494	2.0845	6.02081	49.6866	2.25097e-06	0.000124931
BF669455	CD164 molecule, sialomucin	CD164	8763	208654_s_at	0.506338	-0.333718	-2.03642	-0.230075	1.1159	8.72999	49.451	2.2984e-06	0.000126615
NM_001552	insulin-like growth factor binding protein 4	IGFBP4	3487	201508_at	2.22489	0.180016	0.720777	-1.40088	-1.83149	7.8988	49.4438	2.29987e-06	0.000126615
NM_024563	chromosome 5 open reading frame 23	C5orf23	79614	219054_at	2.85949	-1.16739	0.394172	-1.89289	-1.47121	6.74429	49.2595	2.33788e-06	0.000127626

## Sheet: 5.UpPGCvs.IPSC
Representative Public ID	Gene Title	Gene Symbol	Entrez Gene	ID	EGCvsREF	ESCvsREF	PGCvsREF	ECCvsREF	IPSCvsREF	AveExpr	F	P.Value	adj.P.Val
NM_018189	developmental pluripotency associated 4	DPPA4	55211	219651_at	-2.05273	5.06969	-0.0214575	4.58596	-2.68016	6.2434	504.204	6.43991e-11	1.94578e-06
T50399	hemoglobin, alpha 1 /// hemoglobin, alpha 2	HBA1 /// HBA2		214414_x_at	-1.34679	-0.684915	7.62771	-2.16546	-2.0664	6.24497	456.006	1.01976e-10	1.94578e-06
NM_000702	ATPase, Na+/K+ transporting, alpha 2 polypeptide	ATP1A2	477	203296_s_at	-1.84658	2.27442	0.554424	3.96274	-1.92301	5.58404	350.118	3.41158e-10	2.07018e-06
U55764	sulfotransferase family 1E, estrogen-preferring, member 1	SULT1E1	6783	222940_at	-1.05115	-1.01709	5.02811	-1.27024	-1.11507	4.40813	303.127	6.58606e-10	3.59684e-06
NM_024865	Nanog homeobox	NANOG	79923	220184_at	-2.11592	4.67599	0.939593	5.05746	-3.44078	7.40366	267.546	1.16378e-09	4.63466e-06
NM_004734	doublecortin-like kinase 1	DCLK1	9201	205399_at	-1.8683	4.30257	-0.629655	4.61653	-2.2238	7.13008	266.72	1.1803e-09	4.63466e-06
BE348466	RNA binding protein with multiple splicing 2	RBPMS2	348093	228802_at	-1.02983	3.76892	-0.0948243	3.24749	-2.32826	8.15226	257.845	1.37707e-09	4.63466e-06
V00489	hemoglobin, alpha 1 /// hemoglobin, alpha 2	HBA1 /// HBA2		217414_x_at	-0.803625	-1.02472	5.66016	-1.59391	-1.56563	7.29711	257.319	1.38994e-09	4.63466e-06
AW118997	---	---		240681_at	-1.3472	3.6381	-0.286526	3.31915	-1.88725	5.48589	245.006	1.73774e-09	4.63466e-06
NM_004369	collagen, type VI, alpha 3	COL6A3	1293	201438_at	3.96864	0.550495	2.24741	-2.04126	-4.28957	9.08593	242.341	1.82645e-09	4.63466e-06
BC001186	protocadherin beta 5	PCDHB5	26167	223629_at	-1.18398	3.03635	-0.0100213	2.86398	-1.73077	5.68633	238.235	1.97422e-09	4.63466e-06
NM_002607	platelet-derived growth factor alpha polypeptide	PDGFA	5154	205463_s_at	-1.04143	2.49087	-0.150065	4.10191	-2.42343	6.43454	235.347	2.08695e-09	4.63466e-06
BF569051	H19, imprinted maternally expressed transcript (non-protein coding)	H19	283120	224646_x_at	3.83582	-3.19505	4.24916	-2.67812	-3.81817	9.03851	228.351	2.39416e-09	4.63466e-06
NM_002667	phospholamban	PLN	5350	204939_s_at	-0.845654	-0.907109	5.29029	-1.37363	-1.46309	5.81263	226.972	2.46105e-09	4.63466e-06
NM_002667	phospholamban	PLN	5350	204940_at	-0.779444	-0.893217	3.97364	-0.918782	-0.959389	4.20244	222.832	2.67605e-09	4.71442e-06
AL522781	insulin-like growth factor binding protein-like 1	IGFBPL1	347252	227760_at	-1.34982	3.967	-0.63034	3.18921	-1.67843	6.21898	219.66	2.85644e-09	4.87496e-06
AL575306	H19, imprinted maternally expressed transcript (non-protein coding)	H19	283120	224997_x_at	3.95932	-2.46561	3.15622	-2.88762	-3.31652	7.61159	197.828	4.59722e-09	6.12362e-06
BC005931	hemoglobin, alpha 1 /// hemoglobin, alpha 2	HBA1 /// HBA2		211745_x_at	-0.636277	-1.45117	5.65158	-1.75317	-1.47894	7.17636	186.571	5.99858e-09	7.28002e-06
AI740721	immunoglobulin superfamily, DCC subclass, member 3	IGDCC3	9543	230960_at	-0.905069	1.66847	-0.371678	3.10717	-1.47475	5.75232	182.969	6.5537e-09	7.4566e-06
N32798	zinc finger protein 42 homolog (mouse)	ZFP42	132625	243161_x_at	-0.817953	5.43699	0.899119	-0.776172	-1.07634	4.7583	177.308	7.55836e-09	8.20899e-06
NM_000558	hemoglobin, alpha 1 /// hemoglobin, alpha 2	HBA1 /// HBA2		204018_x_at	-0.544432	-1.19089	4.95442	-1.54024	-1.33472	7.35638	176.09	7.79847e-09	8.20899e-06
BC002712	v-myc myelocytomatosis viral related oncogene, neuroblastoma derived (avian)	MYCN	4613	209757_s_at	-1.11965	3.39407	0.325505	3.57754	-2.61374	7.2612	174.579	8.10937e-09	8.20899e-06
NM_006681	neuromedin U	NMU	10874	206023_at	-1.69528	2.7517	1.05835	2.41953	-1.54053	7.03011	173.524	8.33547e-09	8.20899e-06
AL037401	nuclear receptor subfamily 2, group F, member 2	NR2F2	7026	209120_at	1.96492	-3.86153	2.27332	-4.89234	1.06827	8.8379	173.262	8.39281e-09	8.20899e-06
AF105974	hemoglobin, alpha 1 /// hemoglobin, alpha 2	HBA1 /// HBA2		209458_x_at	-0.64426	-1.30337	5.61979	-1.64987	-1.5679	7.42222	173.15	8.41747e-09	8.20899e-06
D00943	myosin, heavy chain 6, cardiac muscle, alpha	MYH6	4624	214468_at	-1.38289	-1.25002	3.44539	1.62395	-1.57999	6.70787	169.706	9.22033e-09	8.3618e-06
AU148391	hypothetical LOC100506918	LOC100506918	100506918	232105_at	-0.341	-0.0290175	-0.491502	3.63721	-1.74647	5.96158	159.353	1.22646e-08	9.30287e-06
Z98443	WD repeat domain 72	WDR72	256764	227174_at	-1.63437	2.78521	0.0229866	4.14228	-2.07088	5.92081	153.912	1.43546e-08	1.0394e-05
AL365406	zinc finger RNA binding protein 2	ZFR2	23217	233064_at	-0.903972	1.52361	0.211127	2.61409	-1.48738	6.09798	145.248	1.86586e-08	1.2131e-05
AW960707	quinolinate phosphoribosyltransferase	QPRT	23475	242414_at	0.248474	0.405794	0.447957	3.00382	-2.68492	9.0101	143.767	1.95438e-08	1.2557e-05
AK022821	developmental pluripotency associated 4	DPPA4	55211	232985_s_at	-1.58463	4.4229	-0.741356	4.84764	-2.62719	6.9521	140.447	2.17224e-08	1.29597e-05
AF349114	hemoglobin, beta	HBB	3043	211696_x_at	-0.369083	-0.593281	3.07031	-1.03749	-0.788368	6.7846	139.966	2.20617e-08	1.29597e-05
AA788711	collagen, type I, alpha 2	COL1A2	1278	202403_s_at	2.53331	-0.329125	1.52473	-4.35204	-0.538718	11.2965	139.398	2.24713e-08	1.29597e-05
AB033025	KIAA1199	KIAA1199	57214	212942_s_at	2.75203	0.0442433	0.246758	-1.75703	-1.75994	5.86303	138.884	2.28494e-08	1.29597e-05
NM_152573	RAS and EF-hand domain containing	RASEF	158158	1553185_at	-1.42592	2.67325	0.576053	2.0931	-1.24459	9.13909	135.29	2.57246e-08	1.37735e-05
AU151635	---	---		232111_at	-1.33609	3.15111	-0.473214	3.23163	-1.55322	6.452	132.985	2.78011e-08	1.40583e-05
AI693153	gamma-aminobutyric acid (GABA) A receptor, beta 3	GABRB3	2562	229724_at	-1.12868	4.45728	-0.0666263	2.12958	-1.73238	5.46131	130.468	3.03067e-08	1.49485e-05
M25079	hemoglobin, beta	HBB	3043	209116_x_at	-0.439412	-1.17801	4.01856	-1.18419	-1.05749	5.97071	130.02	3.07817e-08	1.49485e-05
NM_002526	5'-nucleotidase, ecto (CD73)	NT5E	4907	203939_at	2.04315	-0.353553	0.573557	-1.3446	-1.41126	5.06611	129.54	3.12997e-08	1.49945e-05
AB015228	aldehyde dehydrogenase 1 family, member A2	ALDH1A2	8854	207016_s_at	0.0217393	-1.21904	3.7306	-1.34005	-1.20909	6.31166	126.797	3.44744e-08	1.57084e-05
N90870	---	---		232113_at	2.40937	-2.2137	2.8862	-3.75536	-1.09203	7.7366	125.749	3.57912e-08	1.58916e-05
AI478781	gamma-aminobutyric acid (GABA) A receptor, beta 3	GABRB3	2562	227830_at	-1.00307	4.0895	-0.686544	2.83676	-1.79358	6.36519	120.844	4.28279e-08	1.73487e-05
AW007080	interleukin 17 receptor D	IL17RD	54756	227997_at	-1.30774	1.96887	0.953782	2.97426	-1.96725	8.4603	119.221	4.55195e-08	1.77203e-05
NM_000851	glutathione S-transferase mu 5	GSTM5	2949	205752_s_at	0.69193	0.0516205	2.10021	-1.36651	-1.19827	6.81273	118.67	4.64809e-08	1.78765e-05
AI969945	Phospholamban	PLN	5350	228202_at	-0.646529	-0.932433	4.16719	-1.11519	-1.07732	4.30727	116.862	4.98112e-08	1.84097e-05
BF510715	fibroblast growth factor 4	FGF4	2249	206783_at	-0.700092	1.92472	-0.46154	2.74459	-1.46351	6.71771	115.069	5.34049e-08	1.86967e-05
NM_018936	protocadherin beta 2	PCDHB2	56133	231725_at	-0.465209	2.34407	-0.439843	2.1492	-1.45572	5.23899	114.281	5.50854e-08	1.88024e-05
AV723914	family with sequence similarity 19 (chemokine (C-C motif)-like), member A5	FAM19A5	25817	229459_at	-0.722221	1.17776	-0.32946	2.88737	-1.37564	4.64615	114.075	5.55345e-08	1.88379e-05
NM_000559	hemoglobin, gamma A /// hemoglobin, gamma G	HBG1 /// HBG2		204848_x_at	-0.832387	-1.97677	5.89615	-1.69021	-1.31265	7.46197	113.141	5.76277e-08	1.91598e-05
NM_000633	B-cell CLL/lymphoma 2	BCL2	596	203685_at	-0.981839	-1.62887	2.93942	-1.07478	0.281708	5.92003	111.413	6.17639e-08	1.9836e-05
NM_000258	myosin, light chain 3, alkali; ventricular, skeletal, slow	MYL3	4634	205589_at	-0.00999055	-0.618211	3.28061	-1.12927	-1.21817	7.05514	110.176	6.49484e-08	2.02965e-05
H17038	ubiquitin-conjugating enzyme E2Q family-like 1	UBE2QL1	134111	226612_at	-0.710794	0.624782	1.44421	1.7624	-1.63521	5.92031	110.046	6.52952e-08	2.02965e-05
U00954	UDP-glucose pyrophosphorylase 2	UGP2	7360	232180_at	-0.980023	4.55037	0.119065	1.62774	-1.70131	6.40437	109.865	6.57807e-08	2.02965e-05
NM_000184	hemoglobin, gamma A /// hemoglobin, gamma G	HBG1 /// HBG2		204419_x_at	-1.03662	-1.83904	6.3165	-1.62994	-1.47474	7.30417	109.009	6.81362e-08	2.0334e-05
NM_006143	G protein-coupled receptor 19	GPR19	2842	207183_at	-0.7728	1.73062	-0.436843	3.5414	-1.87378	6.00413	107.608	7.22194e-08	2.10915e-05
AW974812	---	---		222325_at	-1.4514	2.8969	-0.209118	3.50077	-1.70866	5.09348	107.08	7.38367e-08	2.13357e-05
AW129056	hypothetical LOC57235	KIAA0485	57235	214295_at	-0.532676	-0.457154	2.39141	0.347217	-1.14069	4.76991	106.619	7.52838e-08	2.14139e-05
NM_016599	myozenin 2	MYOZ2	51778	207148_x_at	-0.240741	-0.733202	3.77057	-1.13746	-1.27026	4.98158	105.469	7.90459e-08	2.1478e-05
BF057809	---	---		237911_at	-1.19913	6.85939	1.8199	-1.11494	-1.5573	5.16607	105.426	7.91908e-08	2.1478e-05
AF349571	hemoglobin, alpha 1 /// hemoglobin, alpha 2	HBA1 /// HBA2		211699_x_at	-0.501883	-1.23593	4.83279	-1.45784	-1.33611	7.39814	105.397	7.92908e-08	2.1478e-05
AA491949	---	---		241897_at	-0.614419	3.63738	0.625422	2.67725	-2.79982	6.7671	105.355	7.94332e-08	2.1478e-05
AA594937	cordon-bleu homolog (mouse)	COBL	23242	213050_at	-0.645582	2.91039	-0.508772	2.57939	-1.70496	6.7239	104.04	8.40476e-08	2.2282e-05
H57111	---	---		242343_x_at	-1.30631	2.18425	1.80053	1.30359	-1.49119	7.14794	103.674	8.5389e-08	2.25283e-05
AI133353	hemoglobin, gamma A /// hemoglobin, gamma G	HBG1 /// HBG2		213515_x_at	-1.17183	-1.61096	7.76371	-2.2356	-1.97658	6.57007	102.954	8.81067e-08	2.30404e-05
AU148057	dickkopf homolog 3 (Xenopus laevis)	DKK3	27122	214247_s_at	1.38504	0.90304	1.60305	0.371044	-3.00212	8.71765	102.827	8.85958e-08	2.30404e-05
AK093435	hypothetical locus LOC388666	FLJ36116	388666	1564413_at	-0.850772	3.53246	-0.042538	1.89195	-1.55966	6.8777	102.443	9.00971e-08	2.31751e-05
AF020769	troponin C type 1 (slow)	TNNC1	7134	209904_at	-0.608703	-0.601388	2.66239	-0.195612	-0.835351	5.7477	102.158	9.12354e-08	2.31751e-05
AL832146	---	---		1562235_s_at	-0.818102	2.84813	1.15555	1.26336	-1.74388	5.35794	98.9849	1.05128e-07	2.52923e-05
BF724206	---	---		244457_at	-0.721085	1.34099	0.572609	2.1862	-1.56512	6.38137	98.3114	1.084e-07	2.58519e-05
AA572726	---	---		244610_x_at	-0.753669	2.11974	0.320764	1.65537	-1.27033	5.15428	96.9682	1.15306e-07	2.70267e-05
NM_002318	lysyl oxidase-like 2	LOXL2	4017	202998_s_at	1.86766	0.961146	0.406808	1.21065	-3.26635	8.2225	96.5017	1.17829e-07	2.71195e-05
AK000106	---	---		232541_at	0.372115	-0.434803	1.75881	0.931783	-2.02091	5.59966	96.1857	1.19577e-07	2.71697e-05
AI701943	---	---		243233_at	-0.812674	2.15544	-0.150416	2.05688	-1.17678	5.18277	96.1306	1.19884e-07	2.71697e-05
AF119847	---	---		234032_at	-0.719374	3.18179	-0.193325	2.1869	-1.67027	5.86362	95.8174	1.21653e-07	2.74117e-05
BF593263	Na+/K+ transporting ATPase interacting 4	NKAIN4	128414	228017_s_at	-0.596835	0.252368	2.64962	0.591491	-1.64803	6.19817	93.4492	1.36106e-07	2.90358e-05
BF939176	myozenin 2	MYOZ2	51778	213782_s_at	-0.223681	-1.02484	4.42604	-1.50834	-1.37984	5.09397	92.8672	1.39973e-07	2.95979e-05
AI224133	---	---		228623_at	-0.235632	2.09773	1.27113	1.15303	-2.07972	6.25051	92.4358	1.42926e-07	2.98045e-05
BF059748	glucosaminyl (N-acetyl) transferase 2, I-branching enzyme (I blood group)	GCNT2	2651	230788_at	-1.45024	4.6527	-0.180517	2.88635	-1.90454	6.92845	91.6841	1.48255e-07	3.05533e-05
AL533838	tubulin, beta 2B	TUBB2B	347733	214023_x_at	-0.876936	4.26528	1.07225	2.95573	-3.23015	8.56065	90.8826	1.54205e-07	3.1424e-05
NM_031283	transcription factor 7-like 1 (T-cell specific, HMG-box)	TCF7L1	83439	221016_s_at	0.092824	3.11159	-0.199618	1.92645	-2.28124	7.08358	90.1256	1.60095e-07	3.23825e-05
AF232238	hairy/enhancer-of-split related with YRPW motif 2	HEY2	23493	222921_s_at	0.121628	1.52182	0.457225	1.79767	-2.13216	6.46478	89.3401	1.66498e-07	3.34299e-05
AF010316	prostaglandin E synthase	PTGES	9536	210367_s_at	2.76568	-0.795064	0.18375	-0.976877	-1.97191	7.76764	87.6351	1.81504e-07	3.53734e-05
AW296451	---	---		241681_at	0.0355729	0.84504	1.83201	0.159985	-1.64525	6.21799	86.5048	1.92363e-07	3.67326e-05
NM_006741	protein phosphatase 1, regulatory (inhibitor) subunit 1A	PPP1R1A	5502	205478_at	-0.780466	-0.251697	0.955909	2.60304	-1.50827	5.97979	85.9638	1.97841e-07	3.72575e-05
W57613	---	---		236180_at	-0.347443	1.35939	-0.07668	1.92429	-1.33742	5.97825	85.5985	2.01647e-07	3.75855e-05
U56725	heat shock 70kDa protein 2	HSPA2	3306	211538_s_at	2.07773	3.10445	-0.209868	0.377091	-3.22402	7.96378	85.4862	2.02835e-07	3.76783e-05
X02761	fibronectin 1	FN1	2335	212464_s_at	2.339	1.30382	0.828485	-0.59792	-2.92731	10.9783	85.2606	2.05247e-07	3.78688e-05
N30339	collagen, type V, alpha 1	COL5A1	1289	212488_at	2.68957	0.234588	0.836907	-0.786297	-2.80151	8.21026	83.0601	2.3071e-07	4.09633e-05
AA933717	piwi-like 2 (Drosophila)	PIWIL2	55124	239303_at	-0.568222	0.652077	0.165244	3.39101	-2.01997	6.11455	82.6827	2.35455e-07	4.16145e-05
AF131749	seizure related 6 homolog (mouse)-like 2	SEZ6L2	26470	233337_s_at	0.783519	1.29605	-0.436415	1.40334	-1.86015	7.00676	82.4524	2.3841e-07	4.20008e-05
BF223193	X (inactive)-specific transcript (non-protein coding)	XIST	7503	224589_at	-0.280352	-0.538702	2.24186	-0.676804	-0.583454	3.86269	82.0124	2.4418e-07	4.27416e-05
AI628360	natriuretic peptide receptor C/guanylate cyclase C (atrionatriuretic peptide receptor C)	NPR3	4883	219789_at	2.23796	-0.932032	0.765248	-1.49467	-1.441	5.30186	81.3981	2.52523e-07	4.39204e-05
AF001294	pleckstrin homology-like domain, family A, member 2	PHLDA2	7262	209803_s_at	0.0811827	2.84754	-0.432086	2.69287	-2.53756	6.88825	80.3352	2.67796e-07	4.56033e-05
NM_014618	deleted in bladder cancer 1	DBC1	1620	205818_at	-0.270153	1.6845	0.178523	1.81041	-1.6173	5.90805	80.1503	2.70565e-07	4.56149e-05
X79857	troponin T type 2 (cardiac)	TNNT2	7139	215389_s_at	-0.445333	-0.855166	3.5428	-0.309076	-1.42543	7.00816	79.441	2.81522e-07	4.7307e-05
NM_025057	chromosome 14 open reading frame 45	C14orf45	80127	220173_at	0.333578	-0.449707	1.83657	-1.45424	-0.438563	5.49481	79.3087	2.83625e-07	4.73539e-05
N23651	sidekick homolog 2 (chicken)	SDK2	54549	242064_at	-0.450099	0.68982	1.40996	1.19789	-1.51841	6.00513	79.1281	2.86527e-07	4.73539e-05
AI703476	G protein-coupled receptor 27	GPR27	2850	227769_at	-1.20862	2.4472	-0.333583	3.95833	-2.02361	5.89026	79.0666	2.87524e-07	4.73539e-05
NM_000366	tropomyosin 1 (alpha)	TPM1	7168	206117_at	-1.6577	1.71243	2.98839	0.215689	-1.04916	8.44208	78.7846	2.92145e-07	4.76267e-05
AA903473	integrin, alpha 8	ITGA8	8516	235666_at	2.05876	-1.39415	1.50672	-1.7902	-1.40506	6.05699	78.4766	2.97299e-07	4.78949e-05
BC006428	CXXC finger protein 5	CXXC5	51523	224516_s_at	1.16595	0.712811	0.218058	1.41458	-2.49198	8.59249	78.1999	3.02023e-07	4.80886e-05
BG029530	jumonji, AT rich interactive domain 2	JARID2	3720	203297_s_at	-0.458042	3.05064	0.0304305	0.981063	-1.23317	9.4974	77.6888	3.10992e-07	4.89291e-05
NM_005012	receptor tyrosine kinase-like orphan receptor 1	ROR1	4919	205805_s_at	-0.30217	2.011	0.476662	1.79478	-1.88246	6.561	77.6397	3.11871e-07	4.89291e-05
AW007532	insulin-like growth factor binding protein 5	IGFBP5	3488	211959_at	3.33239	-3.64936	2.07397	-2.77318	-1.6498	9.40406	77.1249	3.21267e-07	4.97036e-05
BE503640	CUGBP, Elav-like family member 5	CELF5	60680	230497_at	-0.386615	2.57181	-0.293089	1.97658	-1.59298	6.2167	76.9082	3.25325e-07	5.00478e-05
NM_003577	undifferentiated embryonic cell transcription factor 1	UTF1	8433	208275_x_at	-0.754263	3.8733	0.129819	0.454933	-0.926671	5.65922	76.5945	3.3131e-07	5.04477e-05
AL046979	tensin 1	TNS1	7145	221748_s_at	2.00483	0.2147	2.60016	-1.2031	-3.00777	7.664	76.5239	3.32675e-07	5.04677e-05
AI694059	teashirt zinc finger homeobox 2	TSHZ2	128553	235616_at	1.39385	-1.1009	2.38208	-1.91978	-1.33509	5.8485	76.2085	3.3886e-07	5.09812e-05
AI802048	unc-5 homolog D (C. elegans)	UNC5D	137970	231325_at	-1.53536	4.01872	0.572146	1.8308	-1.40618	6.18957	76.0294	3.42434e-07	5.12366e-05
BC009278	hypothetical protein LOC645722	LOC645722	645722	1555216_a_at	1.13504	-1.22568	1.95822	-1.43767	-1.07352	5.92128	75.8602	3.45855e-07	5.14664e-05
U90902	T-cell lymphoma invasion and metastasis 1	TIAM1	7074	213135_at	-0.441192	2.25065	0.0167229	2.47719	-1.97164	7.18475	75.778	3.47529e-07	5.1575e-05
NM_000257	myosin, heavy chain 6, cardiac muscle, alpha /// myosin, heavy chain 7, cardiac muscle, beta	MYH6 /// MYH7		204737_s_at	-0.930717	-1.45664	4.52058	0.302122	-1.79887	5.98444	75.2176	3.59224e-07	5.28795e-05
BG290193	zinc finger protein 703	ZNF703	80139	222760_at	0.16561	-0.86336	2.34019	-0.269666	-1.25817	6.7371	74.4857	3.75225e-07	5.4685e-05
AW451711	---	---		217617_at	-0.266176	1.89824	0.487502	1.56393	-1.73419	6.45568	74.1689	3.82421e-07	5.4961e-05
AK024881	---	---		234723_x_at	-1.73325	1.5906	2.12144	1.16739	-0.989504	8.18869	74.0813	3.8444e-07	5.51062e-05
NM_012105	beta-site APP-cleaving enzyme 2	BACE2	25825	217867_x_at	1.07542	-0.34905	0.107292	1.86541	-2.2742	7.46717	73.7602	3.91953e-07	5.55993e-05
AA603590	zinc finger protein 682	ZNF682	91120	242915_at	-1.60832	4.80351	0.369457	2.05517	-1.60927	6.5124	73.4262	3.99959e-07	5.58321e-05
AI365263	developmental pluripotency associated 5	DPPA5	340168	241550_at	-0.494231	5.75727	1.05627	-1.40181	-1.1945	5.01247	72.9439	4.11875e-07	5.62343e-05
BF680255	Ribosomal protein S11	RPS11	6205	213350_at	0.720514	0.545156	1.19858	-1.35748	-0.796299	8.89246	72.6094	4.20392e-07	5.69699e-05
AI990790	---	---		237483_at	-0.49643	2.11313	-0.376707	2.72745	-1.77511	6.37736	72.2662	4.29354e-07	5.74039e-05
BE464483	lipase maturation factor 1	LMF1	64788	227984_at	0.191102	-1.07446	1.98131	0.0177856	-1.16568	5.13337	71.5571	4.48623e-07	5.76028e-05
NM_014211	gamma-aminobutyric acid (GABA) A receptor, pi	GABRP	2568	205044_at	-0.807577	1.59148	0.0700429	2.2155	-1.24661	5.2856	71.2068	4.58527e-07	5.76028e-05
BC037816	---	---		1562828_at	-1.27802	3.45039	0.610307	2.18882	-1.73819	5.53941	71.1601	4.59869e-07	5.76028e-05
AI637733	---	---		241509_at	-0.840361	2.52547	0.731664	1.00117	-1.15669	4.54707	70.6892	4.73658e-07	5.83925e-05
BC002416	biglycan	BGN	633	201261_x_at	2.29536	-1.53138	1.68856	-1.88373	-1.65479	7.03863	70.1311	4.90658e-07	5.99078e-05
N74607	aquaporin 3 (Gill blood group)	AQP3	360	39248_at	2.12889	0.432008	1.1017	-1.01152	-2.33301	7.68356	69.9824	4.95313e-07	6.01123e-05
AA533080	---	---		232835_at	-0.330159	2.77505	0.787198	1.2881	-1.97839	7.56459	69.1501	5.22378e-07	6.21426e-05
NM_000231	sarcoglycan, gamma (35kDa dystrophin-associated glycoprotein)	SGCG	6445	207302_at	-0.173283	-0.565969	2.54643	-0.505017	-0.999001	5.61107	69.1039	5.23935e-07	6.21426e-05
AI743156	kelch-like 31 (Drosophila)	KLHL31	401265	239398_at	-0.358463	-0.120635	2.89854	-0.914698	-0.923885	4.48506	69.1036	5.23945e-07	6.21426e-05
NM_012410	seizure related 6 homolog (mouse)-like 2	SEZ6L2	26470	218720_x_at	0.535312	1.58715	-0.33935	0.990155	-1.49823	6.70617	69.0814	5.24693e-07	6.21426e-05
AI963203	solute carrier family 7 (cationic amino acid transporter, y+ system), member 3	SLC7A3	84889	230597_at	-2.1978	4.41709	-0.275929	3.60484	-1.49384	8.28262	68.8194	5.33631e-07	6.29287e-05
BF438386	RAB27B, member RAS oncogene family	RAB27B	5874	228708_at	2.32409	-0.16367	-0.0660146	-0.586448	-1.83455	5.84054	68.316	5.51332e-07	6.4071e-05
BF057073	---	---		231310_at	-2.1554	5.11101	0.954382	4.60485	-3.25443	8.14688	67.8712	5.67573e-07	6.4935e-05
NM_024880	---	---		206548_at	-0.739845	3.49635	-0.0577098	1.3561	-1.2912	5.38912	67.8185	5.69532e-07	6.4935e-05
AL558875	hypothetical LOC100506168 /// splicing factor proline/glutamine-rich	LOC100506168 /// SFPQ		214016_s_at	-1.45573	1.48095	1.31897	1.38059	-0.837622	10.0393	67.6554	5.75661e-07	6.51099e-05
AI184988	fibrillin 3	FBN3	84467	240117_at	-0.521919	0.891106	1.89815	0.161723	-1.14837	6.83477	67.4996	5.81585e-07	6.53541e-05
BC002490	CXXC finger protein 5	CXXC5	51523	222996_s_at	1.19813	0.339963	0.242834	0.540482	-1.83367	9.32343	67.1762	5.94125e-07	6.60834e-05
NM_020990	creatine kinase, mitochondrial 1A /// creatine kinase, mitochondrial 1B	CKMT1A /// CKMT1B		202712_s_at	-0.738099	2.64586	-0.150297	2.14519	-1.47379	5.95383	66.3988	6.25647e-07	6.79293e-05
AB032977	neuron navigator 1	NAV1	89796	224772_at	0.927276	0.333456	0.608387	1.74393	-2.60664	6.91142	66.3229	6.28832e-07	6.80047e-05
NM_001657	amphiregulin	AREG	374	205239_at	3.81206	0.0859685	-0.336163	-2.39005	-2.02324	6.70636	65.7224	6.5474e-07	6.97024e-05
BC041466	---	---		1564154_at	-0.364406	1.8904	-0.431515	2.48966	-1.63783	6.59976	65.323	6.72696e-07	7.07883e-05
NM_004815	Rho GTPase activating protein 29	ARHGAP29	9411	203910_at	2.17796	0.782606	0.822253	0.930762	-3.60751	8.00215	65.3123	6.73183e-07	7.07883e-05
NM_001771	CD22 molecule	CD22	933	204581_at	0.0736203	-0.45239	1.80597	-0.756295	-0.622604	5.30221	65.2201	6.77415e-07	7.10089e-05
NM_004929	calbindin 1, 28kDa	CALB1	793	205626_s_at	-0.399996	4.42103	0.307138	-0.446582	-0.980719	4.50091	65.1783	6.79347e-07	7.1071e-05
BC004490	FBJ murine osteosarcoma viral oncogene homolog	FOS	2353	209189_at	0.67141	-1.15206	0.537505	2.35017	-2.2125	6.65375	65.0334	6.86088e-07	7.10993e-05
BE439987	growth arrest-specific 7	GAS7	8522	202191_s_at	0.320669	1.04388	1.29625	0.103066	-1.60151	6.66241	65.0042	6.87457e-07	7.11062e-05
NM_003970	myomesin (M-protein) 2, 165kDa	MYOM2	9172	205826_at	-0.236349	-0.531355	2.17291	-0.945845	-0.404579	5.86538	64.4155	7.15767e-07	7.25831e-05
U38276	sema domain, immunoglobulin domain (Ig), short basic domain, secreted, (semaphorin) 3F	SEMA3F	6405	35666_at	0.748542	1.00713	0.964155	0.195636	-1.85744	8.5197	64.3864	7.17206e-07	7.25831e-05
AB051550	contactin associated protein-like 4	CNTNAP4	85445	232388_at	0.515793	-0.64841	1.96145	-1.63703	-0.515939	6.95583	63.897	7.41888e-07	7.36668e-05
AW135013	v-maf musculoaponeurotic fibrosarcoma oncogene homolog B (avian)	MAFB	9935	222670_s_at	0.719658	-1.04742	0.464306	1.13036	-1.43363	7.30495	63.5345	7.60841e-07	7.50359e-05
NM_020215	chromosome 14 open reading frame 132	C14orf132	56967	218820_at	1.17199	0.887658	0.121312	0.61328	-1.9576	8.35452	63.4972	7.62825e-07	7.50359e-05
AK093253	FLJ35934	FLJ35934	400579	1564383_s_at	-0.608198	1.35596	-0.00784414	2.33717	-1.39667	5.85539	62.9401	7.93209e-07	7.66717e-05
AF020768	myosin, light chain 2, regulatory, cardiac, slow	MYL2	4633	209742_s_at	-0.187827	-1.01098	3.41085	-1.0677	-1.03728	5.85769	62.7465	8.0411e-07	7.68634e-05
NM_017817	RAB20, member RAS oncogene family	RAB20	55647	219622_at	1.07717	1.3777	-0.156653	-0.280115	-1.24523	7.87141	62.7402	8.04467e-07	7.68634e-05
AL046017	family with sequence similarity 46, member C	FAM46C	54855	226811_at	-0.537855	-0.617994	0.784978	2.74351	-1.60847	6.11322	62.6129	8.11739e-07	7.70983e-05
AA156723	vesicle amine transport protein 1 homolog (T. californica)-like	VAT1L	57687	226415_at	-0.303927	2.10091	1.15417	2.19284	-2.62772	6.58918	62.5147	8.17404e-07	7.75015e-05
NM_020436	sal-like 4 (Drosophila)	SALL4	57167	229661_at	-1.06529	4.06169	-0.0908849	2.65741	-1.99963	7.83015	62.388	8.24788e-07	7.79297e-05
AI242023	---	---		240458_at	-0.826673	1.4349	0.689495	1.50144	-1.11225	5.47499	62.0679	8.43796e-07	7.81055e-05
NM_021951	doublesex and mab-3 related transcription factor 1	DMRT1	1761	220493_at	-0.210961	-0.93514	1.7649	0.373033	-0.902615	4.52632	61.7369	8.64021e-07	7.90398e-05
AL137578	EMX2 opposite strand (non-protein coding)	EMX2OS	196047	232531_at	0.464352	-1.27782	3.59385	-1.49473	-1.43783	6.03036	61.1183	9.03417e-07	8.13259e-05
BF223023	hypothetical LOC790952	ESRG	790952	231381_at	-2.19643	5.62383	1.46634	4.82711	-3.87381	7.90733	61.0305	9.09185e-07	8.14371e-05
M33653	collagen, type XIII, alpha 1	COL13A1	1305	211343_s_at	0.413132	2.213	0.0327796	1.78525	-2.36282	6.55057	60.9118	9.17055e-07	8.18352e-05
AI671186	peptidase domain containing associated with muscle regeneration 1	PAMR1	25891	213661_at	2.20755	0.813221	0.64777	-1.01189	-2.23588	7.42921	60.6963	9.31553e-07	8.26977e-05
W92748	sema domain, transmembrane domain (TM), and cytoplasmic domain, (semaphorin) 6A	SEMA6A	57556	225660_at	-1.63628	3.67148	0.312445	2.24142	-1.29012	8.98583	60.6783	9.32777e-07	8.26977e-05
N21426	synaptotagmin-like 2	SYTL2	54843	225496_s_at	-0.288125	0.36224	0.723038	1.78721	-1.50612	6.28951	60.6552	9.34345e-07	8.27024e-05
BE644917	X (inactive)-specific transcript (non-protein coding)	XIST	7503	224590_at	-0.424187	-0.587075	2.66741	-0.757449	-0.65343	3.80717	60.3732	9.53818e-07	8.40175e-05
NM_005756	G protein-coupled receptor 64	GPR64	10149	206002_at	-0.980182	2.32636	1.57072	0.909357	-1.44865	5.8629	60.1196	9.71745e-07	8.4641e-05
AA524609	---	---		1559410_at	-1.15338	3.79145	0.0752127	2.13257	-1.58229	5.46662	60.0088	9.79706e-07	8.47896e-05
AK000776	receptor tyrosine kinase-like orphan receptor 1	ROR1	4919	232060_at	-1.15914	2.1366	0.0795199	3.08883	-1.66529	5.48549	59.9671	9.82727e-07	8.47896e-05
AA045184	S100 calcium binding protein A16	S100A16	140576	227998_at	1.83235	-0.397154	0.415282	-0.632295	-1.55529	9.4426	59.7484	9.98735e-07	8.5262e-05
NM_003319	titin	TTN	7273	208195_at	-0.933515	0.560344	4.77542	-0.363244	-2.19472	7.22632	59.2751	1.03449e-06	8.63864e-05
AF130095	fibronectin 1	FN1	2335	210495_x_at	2.18546	1.07253	0.852418	-0.685397	-2.65432	11.3413	59.1671	1.04287e-06	8.6953e-05
AK023134	tudor domain containing 12	TDRD12	91646	215356_at	-0.767804	1.82762	-0.431663	3.59355	-1.94933	7.00037	58.8545	1.06758e-06	8.81667e-05
AW205919	Platelet-derived growth factor alpha polypeptide	PDGFA	5154	229830_at	-0.934752	3.13202	0.375515	3.08626	-2.41711	6.21172	58.8402	1.06873e-06	8.81667e-05
NM_024674	lin-28 homolog A (C. elegans)	LIN28A	79727	219823_at	-2.07915	5.37482	0.457485	5.40535	-3.62101	7.11576	58.6658	1.08284e-06	8.88706e-05
AA526584	G protein-coupled receptor 176	GPR176	11245	227846_at	1.06032	2.33744	-0.203524	-0.251215	-1.53631	7.56434	58.2549	1.11701e-06	8.94789e-05
BE468066	rhabdomyosarcoma 2 associated transcript (non-protein coding)	RMST	196475	229782_at	-1.3992	4.14791	0.291063	3.62768	-2.59593	6.39031	58.1554	1.12548e-06	8.94789e-05
AA679589	exportin 7	XPO7	23039	240168_at	-0.560323	1.77975	1.38924	0.0582415	-0.997915	4.65791	57.9357	1.14445e-06	9.04516e-05
AK001782	CXXC finger protein 5	CXXC5	51523	233955_x_at	1.48933	0.156565	0.184998	0.525363	-2.0151	9.40518	57.7298	1.1626e-06	9.16205e-05
NM_005330	hemoglobin, epsilon 1	HBE1	3046	205919_at	-0.779626	-0.30468	4.73398	-1.4781	-1.2894	6.04755	57.0284	1.22708e-06	9.51816e-05
NM_003155	stanniocalcin 1	STC1	6781	204597_x_at	3.44224	0.633068	0.812167	-2.75169	-2.36025	7.2831	56.8736	1.24189e-06	9.54504e-05
AI204212	developmental pluripotency associated 2	DPPA2	151871	240301_at	-0.939721	3.13063	-0.221928	2.21851	-1.43488	5.49683	56.8021	1.24881e-06	9.57884e-05
NM_014020	transmembrane protein 176B	TMEM176B	28959	220532_s_at	1.51675	-0.724854	0.527719	-1.09433	-0.897384	5.39315	56.65	1.26368e-06	9.63872e-05
AI300520	stanniocalcin 1	STC1	6781	204595_s_at	3.14537	-0.173846	0.641071	-2.67551	-1.73113	8.69668	56.3247	1.29621e-06	9.77691e-05
H47630	zinc finger protein 844	ZNF844	284391	228346_at	0.333262	1.43517	0.384284	0.392261	-1.32935	6.44233	56.2938	1.29935e-06	9.77691e-05
BG540454	secretoglobin, family 3A, member 2	SCGB3A2	117156	228782_at	-0.460199	2.93866	0.0191248	1.61076	-1.60595	5.61769	56.1755	1.31146e-06	9.77691e-05
BC005858	fibronectin 1	FN1	2335	211719_x_at	2.23895	1.16617	1.01877	-0.612484	-2.89853	11.2735	55.7446	1.35678e-06	9.93272e-05
NM_024609	nestin	NES	10763	218678_at	0.301293	2.64721	-0.214515	1.47213	-2.02211	8.01838	54.9151	1.44952e-06	0.000102809
NM_012113	carbonic anhydrase XIV	CA14	23632	219464_at	-0.687159	1.59526	0.070706	2.37947	-1.47804	7.39534	54.8716	1.45459e-06	0.000103035
NM_004789	LIM homeobox 2	LHX2	9355	206140_at	-1.53098	-1.53016	2.14954	3.03594	-1.41596	5.73024	54.6651	1.47897e-06	0.000103819
AI267414	Zinc finger protein 518A	ZNF518A	9849	244132_x_at	-0.929021	2.05509	0.905256	1.11652	-1.10386	5.74912	54.6306	1.48308e-06	0.000103974
BG326592	adenomatosis polyposis coli down-regulated 1-like	APCDD1L	164284	235548_at	0.77773	-0.919062	1.47819	-0.510706	-1.11636	6.36145	54.5393	1.49406e-06	0.000104475
NM_019102	homeobox A5	HOXA5	3202	213844_at	2.80861	-2.74334	1.9403	-2.97857	-1.20198	7.46888	54.5141	1.49711e-06	0.000104552
NM_013453	sperm protein associated with the nucleus, X-linked, family member A1 /// SPANX family, member A2 /// SPANX family, member B1 /// SPANX family, member B2 /// SPANX family, member C /// SPANX family, member F1	SPANXA1 /// SPANXA2 /// SPANXB1 /// SPANXB2 /// SPANXC /// SPANXF1		220922_s_at	-0.0267632	-0.264504	2.57261	-1.03424	-0.910647	5.9789	54.4452	1.50547e-06	0.000104594
AI742383	---	---		240231_at	-1.2228	2.52856	0.270504	2.45195	-1.43501	5.59483	54.3043	1.52276e-06	0.000104791
AF245505	matrix-remodelling associated 5	MXRA5	25878	209596_at	1.8972	-0.769583	1.88321	-0.365515	-2.65247	7.65547	54.0053	1.56026e-06	0.000105478
NM_006633	IQ motif containing GTPase activating protein 2	IQGAP2	10788	203474_at	-1.22835	3.09562	0.146212	2.37884	-1.48689	6.09645	53.7088	1.59856e-06	0.000106655
AI816281	---	---		228974_at	0.0376915	2.57381	0.295799	2.22404	-2.57552	7.4267	53.5287	1.62237e-06	0.000107138
AI983428	collagen, type V, alpha 1	COL5A1	1289	212489_at	2.18188	-0.128752	1.68373	-1.08217	-2.54	6.96809	53.1735	1.67065e-06	0.000109399
AK026737	fibronectin 1	FN1	2335	216442_x_at	2.30102	1.07622	0.866684	-0.774501	-2.72122	11.3097	52.6359	1.74705e-06	0.000111079
NM_014863	carbohydrate (N-acetylgalactosamine 4-sulfate 6-O) sulfotransferase 15	CHST15	51363	203066_at	0.374805	1.30533	0.862756	0.658634	-1.82417	6.61645	52.5996	1.75236e-06	0.000111079
R60139	unc-13 homolog A (C. elegans)	UNC13A	23025	227453_at	-0.149458	0.640772	-0.015864	1.49063	-1.04731	6.04161	52.5931	1.75332e-06	0.000111079
W86781	---	---		222366_at	-0.878917	2.7706	1.97225	0.210929	-1.50007	6.30588	52.4827	1.7696e-06	0.000111205
BF753047	---	---		244726_at	0.00844721	0.551934	0.922794	0.922794	-1.42282	6.17097	52.2423	1.80571e-06	0.000112351
T97717	Proteasome (prosome, macropain) activator subunit 4	PSME4	23198	237180_at	-0.903597	2.52959	0.864376	1.22011	-1.32926	6.53076	52.0916	1.82881e-06	0.000113417
AA993566	---	---		239597_at	-1.06911	3.32435	1.3828	1.83806	-2.18625	6.71912	51.7687	1.87952e-06	0.000115592
NM_001824	creatine kinase, muscle	CKM	1158	204810_s_at	-0.375575	-0.669172	3.52719	-1.06137	-1.04525	5.35578	51.6802	1.89371e-06	0.000116222
AI149880	---	---		242688_at	-0.613987	1.34561	0.68731	1.63648	-1.38374	6.71802	51.6783	1.89401e-06	0.000116222
AI524125	protocadherin 9	PCDH9	5101	219737_s_at	0.142857	-1.24669	2.14819	-2.32172	0.388394	6.78093	51.5961	1.90732e-06	0.000116723
NM_018355	zinc finger protein 415	ZNF415	55786	205514_at	0.190954	1.17824	-0.14008	1.93282	-1.77886	5.63922	51.453	1.93075e-06	0.000117552
NM_000346	SRY (sex determining region Y)-box 9	SOX9	6662	202936_s_at	1.10556	0.457761	0.301399	0.222358	-1.60732	6.14614	51.1896	1.9748e-06	0.000118256
AL049245	---	---		1563357_at	0.041715	3.07282	0.284597	0.101509	-1.32339	4.37911	51.0572	1.99739e-06	0.000118645
AA608834	---	---		242068_at	-0.697883	2.22308	1.55604	0.692671	-1.54228	5.49528	51.0456	1.99939e-06	0.000118645
NM_153224	hypothetical protein MGC34034	MGC34034	154089	1552899_at	-0.30009	-0.216545	1.88114	-0.45809	-0.57643	4.15315	50.9125	2.02247e-06	0.000119247
NM_021913	AXL receptor tyrosine kinase	AXL	558	202686_s_at	1.8709	0.954177	-0.0186974	0.238727	-2.33564	8.15484	50.5965	2.07856e-06	0.000120651
AW070371	STT3, subunit of the oligosaccharyltransferase complex, homolog B (S. cerevisiae)	STT3B	201595	238303_at	-0.52983	1.65388	0.889235	0.493846	-0.943516	4.8455	50.5939	2.07902e-06	0.000120651
AW137517	---	---		231079_at	-0.558607	2.70711	0.100289	2.41196	-2.0186	7.05386	50.5821	2.08115e-06	0.000120651
U08839	plasminogen activator, urokinase receptor	PLAUR	5329	210845_s_at	1.96333	-0.580059	0.0074875	0.0456275	-1.80539	7.0732	50.5412	2.08856e-06	0.000120708
AF026219	deleted in liver cancer 1	DLC1	10395	210762_s_at	1.66663	-0.736293	1.41911	-0.199792	-2.23408	7.56764	50.4783	2.10001e-06	0.000121064
NM_014446	integrin beta 1 binding protein 3	ITGB1BP3	27231	221051_s_at	-0.598532	1.09627	-0.00230177	2.51897	-1.44467	7.07189	50.3518	2.12329e-06	0.000121806
AI986192	serpin peptidase inhibitor, clade B (ovalbumin), member 9	SERPINB9	5272	242814_at	0.368274	3.34297	0.409749	-0.326693	-1.53797	6.21952	50.1751	2.15632e-06	0.00012267
AI417917	EH-domain containing 2	EHD2	30846	221870_at	1.11232	-0.0185085	1.0379	-0.728463	-1.31244	7.77356	50.1389	2.16317e-06	0.000122867
AK026366	zinc finger protein 677	ZNF677	342926	1560562_a_at	-0.122188	1.68044	0.022466	1.38889	-1.37886	5.97959	50.078	2.17475e-06	0.00012295
NM_012244	solute carrier family 7 (amino acid transporter, L-type), member 8	SLC7A8	23428	202752_x_at	0.310808	2.06565	-0.139325	0.723742	-1.38897	7.93216	50.0614	2.17791e-06	0.000123001
AB032981	poly(A) binding protein interacting protein 2B	PAIP2B	400961	221868_at	-0.480727	1.92688	0.0665172	1.54224	-1.23407	6.25606	50.0483	2.18041e-06	0.000123002
AA648521	splicing factor, arginine/serine-rich 15	SFRS15	57466	222310_at	-1.77003	1.33048	0.790511	2.13281	-0.622348	6.42998	50.0194	2.18595e-06	0.000123073
AI084451	---	---		1559391_s_at	-1.53806	2.3526	0.495286	2.11126	-0.983839	6.01356	49.5398	2.28039e-06	0.0001263
NM_001552	insulin-like growth factor binding protein 4	IGFBP4	3487	201508_at	2.22489	0.180016	0.720777	-1.40088	-1.83149	7.8988	49.4438	2.29987e-06	0.000126615
NM_001100	actin, alpha 1, skeletal muscle	ACTA1	58	203872_at	-0.959104	2.5537	2.06124	-0.91165	-0.65852	6.00986	49.381	2.31273e-06	0.000127101
AI732802	---	---		222371_at	-0.721418	1.81902	0.0533312	2.16218	-1.36193	5.95277	49.3533	2.31843e-06	0.000127253
AA037766	TMF1-regulated nuclear protein 1	TRNP1	388610	227862_at	0.378956	1.36554	0.481159	1.25305	-1.99028	7.64173	49.3203	2.32524e-06	0.000127342
AF098306	sperm protein associated with the nucleus, X-linked, family member A1 /// SPANX family, member A2 /// SPANX family, member C	SPANXA1 /// SPANXA2 /// SPANXC		224032_x_at	0.0830592	-0.36761	1.55437	-0.519012	-0.650762	5.28716	49.2994	2.32958e-06	0.000127353
NM_024563	chromosome 5 open reading frame 23	C5orf23	79614	219054_at	2.85949	-1.16739	0.394172	-1.89289	-1.47121	6.74429	49.2595	2.33788e-06	0.000127626

## Sheet: 6.UpIPSCvs.PGC
Representative Public ID	Gene Title	Gene Symbol	Entrez Gene	ID	EGCvsREF	ESCvsREF	PGCvsREF	ECCvsREF	IPSCvsREF	AveExpr	F	P.Value	adj.P.Val
AI808090	sparc/osteonectin, cwcv and kazal-like domains proteoglycan (testican) 3	SPOCK3	50859	235342_at	-1.51581	-1.55584	-1.65788	-1.85567	4.37679	5.77583	451.342	1.06885e-10	1.94578e-06
AW026426	SOX2 overlapping transcript (non-protein coding)	SOX2OT	347689	231898_x_at	-2.36629	-1.28375	-2.53625	-0.711664	4.95949	5.59419	351.402	3.355e-10	2.07018e-06
BC007230	coagulation factor C homolog, cochlin (Limulus polyphemus)	COCH	1690	1554242_a_at	-2.23887	-0.487709	-1.90268	0.947436	3.03827	6.35747	241.271	1.86365e-09	4.63466e-06
AI191897	ChaC, cation transport regulator homolog 2 (E. coli)	CHAC2	494143	235117_at	-2.66071	0.27084	-2.31826	0.826078	3.56522	7.10625	236.183	2.05351e-09	4.63466e-06
BC002665	proteolipid protein 1	PLP1	5354	210198_s_at	-3.13425	2.26435	-1.56075	1.93455	2.13026	7.21752	234.61	2.11695e-09	4.63466e-06
NM_006444	structural maintenance of chromosomes 2	SMC2	10592	204240_s_at	-1.76274	0.986333	-2.11558	1.09521	2.11421	7.19062	233.61	2.15848e-09	4.63466e-06
AL136825	ubiquitin specific peptidase 44	USP44	84101	224048_at	-2.60233	2.92959	-2.51644	2.8764	1.38582	6.81868	229.027	2.36218e-09	4.63466e-06
AI669815	SRY (sex determining region Y)-box 2	SOX2	6657	228038_at	-3.39814	3.77653	-1.86066	3.99344	0.717442	7.79467	210.344	3.47863e-09	5.557e-06
BE671123	transmembrane protein 170B	TMEM170B	100113407	235798_at	-1.95562	-0.878168	-1.77521	0.724014	2.94914	5.41196	193.422	5.0925e-09	6.62182e-06
BF513800	potassium voltage-gated channel, KQT-like subfamily, member 5	KCNQ5	56479	244623_at	-0.71172	-1.0119	-1.12298	-1.12749	2.54933	5.3449	185.433	6.16752e-09	7.32233e-06
BC042959	hypothetical LOC100507455	LOC100507455	100507455	1556194_a_at	-2.13608	-1.31746	-2.14767	0.234358	3.85078	5.53951	181.974	6.71797e-09	7.48752e-06
AI272941	transient receptor potential cation channel, subfamily M, member 8	TRPM8	79054	243483_at	-1.21163	-1.36128	-1.30186	-1.31299	3.40862	5.2339	172.109	8.65085e-09	8.27475e-06
NM_014278	heat shock 70kDa protein 4-like	HSPA4L	22824	205543_at	-1.73231	-0.570325	-1.75075	-0.0174105	3.10119	6.25868	167.951	9.66524e-09	8.51367e-06
BC002477	dehydrogenase E1 and transketolase domain containing 1	DHTKD1	55526	209916_at	-1.88191	0.911821	-1.04766	1.89196	1.0151	7.69079	165.524	1.03247e-08	8.95019e-06
AW025579	bicaudal C homolog 1 (Drosophila)	BICC1	80114	213429_at	1.31614	-2.90803	-0.915772	-2.53734	1.95528	7.16207	163.515	1.09122e-08	9.0991e-06
AF229180	aminoadipate-semialdehyde synthase	AASS	10157	210852_s_at	-2.23131	4.36351	-0.819914	0.691426	0.862465	7.22191	160.592	1.18416e-08	9.30287e-06
BC041970	family with sequence similarity 201, member A	FAM201A	158228	1557014_a_at	-1.48173	-0.508667	-1.30749	1.54002	1.49627	5.37004	160.536	1.18604e-08	9.30287e-06
AI805082	olfactory receptor, family 51, subfamily E, member 2	OR51E2	81285	236121_at	-0.826799	-1.4472	-1.1742	-1.57302	3.14068	5.07737	155.266	1.37965e-08	1.0182e-05
AI123532	neuronal growth regulator 1	NEGR1	257194	229461_x_at	-1.52151	-1.46211	-1.35509	-1.01487	3.58885	5.11624	152.439	1.49935e-08	1.06343e-05
AL133386	bone morphogenetic protein 5	BMP5	653	205430_at	-0.987936	-1.10474	-1.21214	-1.31033	3.03782	4.56979	151.166	1.55737e-08	1.09042e-05
AW183154	kinesin family member 14	KIF14	9928	236641_at	-2.48084	1.92812	-2.21639	3.08335	1.26017	6.64066	146.576	1.7906e-08	1.19256e-05
L07335	SRY (sex determining region Y)-box 2	SOX2	6657	213721_at	-1.52183	2.10619	-1.34669	3.0665	-0.326777	7.03161	142.02	2.06551e-08	1.2812e-05
AW779917	---	---		230003_at	-0.958842	-0.696356	-0.699051	-0.90806	2.26237	6.51138	140.7	2.15463e-08	1.29597e-05
AI368909	solute carrier family 6 (neutral amino acid transporter), member 15	SLC6A15	55117	239352_at	-1.03476	-0.891375	-0.93434	-0.819531	2.50113	5.12665	139.526	2.23777e-08	1.29597e-05
NM_016950	sparc/osteonectin, cwcv and kazal-like domains proteoglycan (testican) 3	SPOCK3	50859	206434_at	-1.07017	-1.24479	-1.05108	-1.29077	3.04633	4.61758	137.215	2.41329e-08	1.34487e-05
NM_005044	protein kinase, X-linked	PRKX	5613	204061_at	-1.63256	1.00242	-1.74861	1.83255	1.24246	6.68158	136.111	2.50305e-08	1.36333e-05
NM_006727	cadherin 10, type 2 (T2-cadherin)	CDH10	1008	220115_s_at	-1.19685	-1.62114	-0.626402	-1.0464	2.85243	6.3269	135.892	2.52131e-08	1.36333e-05
NM_001008	ribosomal protein S4, Y-linked 1	RPS4Y1	6192	201909_at	1.51257	1.70994	-1.07068	-5.83475	2.52106	10.5364	134.467	2.64431e-08	1.38829e-05
AJ271379	spindlin family, member 3	SPIN3	169981	1555882_at	-1.00671	0.0314629	-1.95974	1.4408	1.34218	5.73594	134.41	2.6494e-08	1.38829e-05
AW592266	v-myb myeloblastosis viral oncogene homolog (avian)-like 1	MYBL1	4603	213906_at	-2.12908	1.3896	-1.75173	1.84756	1.60199	5.64778	133.949	2.69084e-08	1.38829e-05
NM_014432	interleukin 20 receptor, alpha	IL20RA	53832	219115_s_at	-1.28876	-1.23368	-1.26236	-0.73947	3.03454	5.61955	133.908	2.69457e-08	1.38829e-05
N90755	CAP, adenylate cyclase-associated protein, 2 (yeast)	CAP2	10486	212554_at	-2.60667	-0.278873	-0.640386	1.48483	2.13666	7.46644	130.39	3.03884e-08	1.49485e-05
AI760495	cytochrome c, somatic	CYCS	54205	244546_at	-1.75441	0.534737	-1.17337	0.7968	1.82721	5.25916	129.881	3.09301e-08	1.49485e-05
NM_021127	phorbol-12-myristate-13-acetate-induced protein 1	PMAIP1	5366	204286_s_at	-1.47275	2.26296	-2.40541	3.40916	0.0492612	7.4397	126.764	3.45157e-08	1.57084e-05
AI871385	chromosome 2 open reading frame 82	C2orf82	389084	230244_at	-0.82434	-0.773082	-0.786111	-0.700506	2.07311	5.12721	124.748	3.71052e-08	1.62114e-05
W46994	---	---		229417_at	-1.83021	-0.289339	-1.43929	1.51197	1.8782	6.2518	124.185	3.78697e-08	1.64141e-05
BG165011	proline rich 11	PRR11	55771	228273_at	-2.26175	1.87297	-1.64879	1.82874	1.51745	9.39177	123.609	3.86733e-08	1.65195e-05
BC013077	---	---		1558522_at	-1.52889	0.484233	-1.83122	1.18588	1.79771	5.43084	122.527	4.0238e-08	1.69126e-05
NM_000824	glycine receptor, beta	GLRB	2743	205280_at	-1.21781	-1.79428	-1.05517	-0.185736	2.64317	5.29403	122.513	4.02584e-08	1.69126e-05
NM_018685	anillin, actin binding protein	ANLN	54443	1552619_a_at	-1.96417	0.701543	-2.39716	3.18547	1.20478	6.80857	122.029	4.09839e-08	1.69565e-05
BE220330	chromosome 7 open reading frame 46	C7orf46	340277	228600_x_at	-0.836508	1.54396	-0.304056	-2.4474	2.15616	5.8362	121.241	4.21991e-08	1.7328e-05
AI478743	calcitonin receptor-like	CALCRL	10203	234996_at	-0.979447	-1.00865	-0.824028	-1.53936	2.89125	4.70709	120.63	4.31714e-08	1.73487e-05
NM_016205	platelet derived growth factor C	PDGFC	56034	218718_at	0.0871613	-2.24862	-0.49537	-1.65643	2.09691	9.47638	120.611	4.32025e-08	1.73487e-05
AF155117	kinesin family member 21A	KIF21A	55605	231875_at	-2.09585	-1.40841	-1.90632	1.85156	2.60183	5.76254	120.044	4.41304e-08	1.75919e-05
AA633992	chromosome 11 open reading frame 87	C11orf87	399947	1557181_s_at	-0.962064	-0.812211	-0.870243	-0.919704	2.4261	4.32442	119.723	4.46657e-08	1.76763e-05
AL080135	testis-specific transcript, Y-linked 15 (non-protein coding)	TTTY15	64595	214983_at	-0.894947	0.636095	-1.78011	0.977	1.21832	6.06552	119.099	4.57303e-08	1.77203e-05
AI357639	---	---		225716_at	-2.53978	-0.138266	-1.02375	1.26999	2.42171	7.92863	119.088	4.57502e-08	1.77203e-05
AJ278112	DEP domain containing 1	DEPDC1	55635	232278_s_at	-1.86346	-0.190829	-2.23358	2.60161	1.68172	6.20178	118.443	4.68833e-08	1.79052e-05
AI803485	URB1 ribosome biogenesis 1 homolog (S. cerevisiae)	URB1	9875	212996_s_at	-1.68661	0.822847	-0.644483	0.925008	1.22531	6.80531	118.085	4.75279e-08	1.80253e-05
BF671894	required for meiotic nuclear division 5 homolog A (S. cerevisiae)	RMND5A	64795	212482_at	-1.36022	0.301102	-1.28185	1.04936	1.41484	8.64212	116.923	4.96938e-08	1.84097e-05
BG179854	myelin expression factor 2	MYEF2	50804	222772_at	-1.86103	0.352508	-1.35409	1.7733	1.46406	6.45143	116.467	5.05771e-08	1.84718e-05
AI674107	dyslexia susceptibility 1 candidate 1	DYX1C1	161582	235273_at	-1.15706	0.395543	-0.472446	-1.3102	2.21364	5.53096	116.176	5.11505e-08	1.84999e-05
AI452512	transmembrane protein 20	TMEM20	159371	236219_at	-0.971072	-0.70604	-1.53882	0.465434	1.92201	5.28364	115.167	5.32019e-08	1.86967e-05
NM_000077	cyclin-dependent kinase inhibitor 2A (melanoma, p16, inhibits CDK4)	CDKN2A	1029	207039_at	-0.811745	-1.39417	-1.01486	-1.48729	2.94457	5.86547	114.905	5.37488e-08	1.86967e-05
BG285011	AT rich interactive domain 5B (MRF1-like)	ARID5B	84159	212614_at	1.38232	-2.43122	-0.223564	-2.65693	1.34841	8.51733	113.466	5.68882e-08	1.90603e-05
AA287457	chromosome 12 open reading frame 73	C12orf73	728568	226943_at	-1.03415	-0.94625	-1.50908	0.524207	2.00614	7.49434	112.011	6.02946e-08	1.96018e-05
AV720650	family with sequence similarity 169, member A	FAM169A	26049	235048_at	-2.66438	2.2212	-0.693948	2.35178	0.81876	7.87817	111.861	6.06578e-08	1.96018e-05
D42055	neural precursor cell expressed, developmentally down-regulated 4	NEDD4	4734	213012_at	-0.761162	-2.107	-1.55593	-1.64177	3.59529	7.46016	110.885	6.31006e-08	2.00355e-05
AI346445	sideroflexin 4	SFXN4	119559	229236_s_at	-0.987583	-1.13555	-0.975816	-0.331751	2.23781	7.56028	109.895	6.56995e-08	2.02965e-05
BC013944	chromosome 13 open reading frame 38	C13orf38	728591	1570153_at	-0.852877	2.84474	-1.20232	-1.45701	1.67752	5.13295	109.684	6.62702e-08	2.03327e-05
NM_007274	acyl-CoA thioesterase 7	ACOT7	11332	208002_s_at	-1.92913	1.63893	-0.948636	0.663158	1.57313	8.38727	109.054	6.8011e-08	2.0334e-05
BF446180	programmed cell death 2	PDCD2	5134	213581_at	-1.81356	0.928854	-1.44674	0.839303	1.9089	7.67618	107.873	7.14265e-08	2.09721e-05
NM_001423	epithelial membrane protein 1	EMP1	2012	201324_at	2.18038	-2.32751	0.193545	-4.2812	1.32056	8.41625	107.39	7.28831e-08	2.11721e-05
BE613178	cystathionine-beta-synthase	CBS	875	212816_s_at	-1.98961	1.89797	-2.75076	2.33405	1.63476	7.69891	106.892	7.44233e-08	2.1392e-05
AL135396	family with sequence similarity 72, member A /// family with sequence similarity 72, member B /// family with sequence similarity 72, member C /// family with sequence similarity 72, member D	FAM72A /// FAM72B /// FAM72C /// FAM72D		225834_at	-2.71859	2.17651	-2.93552	3.92941	1.3305	8.4206	106.423	7.59079e-08	2.14586e-05
NM_018423	serine/threonine/tyrosine kinase 1	STYK1	55359	220030_at	-2.07332	-0.215392	-1.76505	0.367441	3.07686	5.69149	106.324	7.62268e-08	2.14586e-05
M14087	---	---		216405_at	3.16624	-5.06732	-0.671465	-5.80243	2.83879	10.3276	105.888	7.7649e-08	2.1478e-05
NM_018098	epithelial cell transforming sequence 2 oncogene	ECT2	1894	219787_s_at	-1.95825	2.05591	-2.61174	2.50751	1.34243	8.27894	105.694	7.82926e-08	2.1478e-05
BF111626	centromere protein N	CENPN	55839	228559_at	-1.95383	0.779891	-0.617429	2.10058	0.705106	7.1779	105.176	8.0041e-08	2.1478e-05
AI670947	connector enhancer of kinase suppressor of Ras 2	CNKSR2	22866	229116_at	-1.78235	1.58029	-1.47181	0.585172	1.84668	5.83951	105.121	8.02285e-08	2.1478e-05
NM_003385	visinin-like 1	VSNL1	7447	203798_s_at	-2.14318	0.0925027	-1.94355	1.77335	2.22581	6.2086	102.921	8.82324e-08	2.30404e-05
AA939270	importin 7	IPO7	10527	200993_at	-0.94619	0.887355	-2.3847	1.29151	1.3792	9.98863	102.545	8.96968e-08	2.31751e-05
M32721	poly (ADP-ribose) polymerase 1	PARP1	142	208644_at	-1.86734	1.73908	-0.795476	1.84498	0.587974	9.77903	102.346	9.04814e-08	2.31751e-05
AA825721	---	---		242228_at	-1.42413	2.10093	-1.7275	2.14914	0.442726	5.73436	102.163	9.12147e-08	2.31751e-05
BG164358	DEAD (Asp-Glu-Ala-Asp) box polypeptide 21	DDX21	9188	224654_at	-1.2716	1.33432	-2.1016	0.707721	1.75609	10.1457	100.632	9.76183e-08	2.44126e-05
BC001305	ELOVL family member 6, elongation of long chain fatty acids (FEN1/Elo2, SUR4/Elo3-like, yeast)	ELOVL6	79071	210868_s_at	-1.98453	1.78742	-1.70094	0.85567	1.95224	6.84967	100.393	9.86642e-08	2.44925e-05
R56118	Hypothetical protein LOC100288092	LOC100288092	100288092	235147_at	-1.45897	0.00105218	-1.49913	0.446354	2.16047	5.23892	100.084	1.0004e-07	2.45372e-05
H24398	chromosome 11 open reading frame 87	C11orf87	399947	236532_at	-0.803504	-0.427663	-0.864461	-0.878949	2.10833	4.27982	97.9347	1.10285e-07	2.6187e-05
AK001166	DEP domain containing 1B	DEPDC1B	55789	226980_at	-2.54362	2.46611	-1.96165	2.09896	1.63004	6.8282	97.6928	1.11517e-07	2.63648e-05
BF342661	microtubule-associated protein 2	MAP2	4133	225540_at	-0.680975	-2.34956	0.872392	-2.16715	2.32733	7.23257	97.5123	1.12446e-07	2.64699e-05
AI950078	zinc finger protein 398	ZNF398	57541	228145_s_at	-1.41412	2.07202	-1.44592	3.04938	-0.345528	8.20888	96.7008	1.16744e-07	2.71195e-05
BF739979	pyruvate dehydrogenase (lipoamide) alpha 1	PDHA1	5160	200979_at	-1.68022	0.168701	-1.15228	1.43369	1.43638	7.46251	96.4369	1.18185e-07	2.71195e-05
AW135279	cyclin Y-like 1	CCNYL1	151195	228810_at	-1.48858	1.49566	-1.60162	1.91669	0.779981	6.063	96.1284	1.19896e-07	2.71697e-05
NM_014317	prenyl (decaprenyl) diphosphate synthase, subunit 1	PDSS1	23590	220865_s_at	-1.81319	0.868356	-1.86134	0.923435	2.14901	6.587	95.6867	1.224e-07	2.74117e-05
BF108778	---	---		235363_at	-2.25047	3.12682	-1.81522	2.35894	0.845719	6.82289	95.413	1.23984e-07	2.76372e-05
AW589793	---	---		237885_at	-1.12756	-1.51981	-1.57568	-0.871566	3.26566	5.01075	95.1937	1.2527e-07	2.77729e-05
AI934407	dehydrogenase E1 and transketolase domain containing 1	DHTKD1	55526	227094_at	-1.49462	1.76772	-1.90484	1.96092	0.867989	8.00829	95.1041	1.258e-07	2.77729e-05
AA897516	prostaglandin E receptor 4 (subtype EP4)	PTGER4	5734	204897_at	-1.60008	-0.421863	-1.07821	-1.22879	3.2787	5.81683	95.0175	1.26316e-07	2.77729e-05
AI953354	---	---		232254_at	-1.33191	0.889971	-1.15051	-0.0568999	1.84019	6.03066	94.8522	1.27306e-07	2.77729e-05
R43158	fragile X mental retardation, autosomal homolog 1	FXR1	8087	230201_at	-2.03431	2.23342	-0.606756	1.54159	0.666615	6.66802	94.8098	1.27562e-07	2.77729e-05
NM_018131	centrosomal protein 55kDa	CEP55	55165	218542_at	-1.72198	1.48545	-1.50873	1.7522	1.06452	7.13942	94.5968	1.28855e-07	2.78194e-05
AW182455	sideroflexin 4	SFXN4	119559	225143_at	-1.74534	-0.251411	-0.0886933	-0.282897	2.07687	8.04884	94.5935	1.28876e-07	2.78194e-05
AK025651	hypothetical LOC100507192	LOC100507192	100507192	221648_s_at	-1.19297	1.4218	-1.07908	1.89613	0.174341	5.48228	93.9132	1.33117e-07	2.86216e-05
AI801563	Carbonic anhydrase VB pseudogene	CA5BP	340591	239106_at	-1.48931	0.611808	-1.55602	1.48565	1.33229	5.99616	93.7907	1.33898e-07	2.86768e-05
NM_014624	S100 calcium binding protein A6	S100A6	6277	217728_at	2.38396	-2.14947	-0.524653	-4.77904	1.86832	10.2364	92.9459	1.39442e-07	2.95979e-05
BE218107	EPH receptor A5	EPHA5	2044	237939_at	-0.768366	-1.34183	-1.10384	-1.18788	2.74346	4.55034	92.4134	1.43081e-07	2.98045e-05
AW294765	F-box protein 22	FBXO22	26263	225734_at	-1.57134	1.04592	-1.96971	1.5239	1.51991	7.53919	92.349	1.4353e-07	2.98045e-05
AA669336	coagulation factor C homolog, cochlin (Limulus polyphemus)	COCH	1690	205229_s_at	-2.46452	0.717678	-2.34773	1.04769	3.09199	7.67889	91.9794	1.46133e-07	3.02302e-05
AW772140	WD repeat and HMG-box DNA binding protein 1	WDHD1	11169	204727_at	-1.85348	1.90691	-1.92491	2.87943	0.581504	5.44578	91.0766	1.52739e-07	3.12434e-05
NM_014321	origin recognition complex, subunit 6	ORC6	23594	219105_x_at	-1.86082	1.68558	-0.446645	1.25386	0.760818	9.41436	91.0755	1.52747e-07	3.12434e-05
AV730849	SLAIN motif family, member 1	SLAIN1	122060	225619_at	-2.12763	0.710958	-2.06854	0.521715	2.92186	6.73439	90.628	1.56156e-07	3.17032e-05
BC005170	minichromosome maintenance complex component 8	MCM8	84515	224320_s_at	-2.11493	1.17446	-1.61193	1.79889	1.5988	6.11698	89.8618	1.62211e-07	3.26894e-05
NM_021073	bone morphogenetic protein 5	BMP5	653	205431_s_at	-0.463503	-1.09644	-1.07509	-1.17019	2.32583	5.78591	88.2367	1.76028e-07	3.51471e-05
AV733347	partner of NOB1 homolog (S. cerevisiae)	PNO1	56902	242905_at	-1.54768	0.286744	-1.67128	1.33989	1.67302	5.84834	88.063	1.77588e-07	3.51471e-05
BE897866	acyl-CoA dehydrogenase, short/branched chain	ACADSB	36	226030_at	-1.0861	-0.426474	-1.24208	-0.0122229	2.06446	6.26534	88.059	1.77624e-07	3.51471e-05
AJ271832	protein phosphatase, Mg2+/Mn2+ dependent, 1B	PPM1B	5495	213225_at	-1.14029	2.76169	-1.29585	1.81229	-0.124565	8.40313	87.868	1.79359e-07	3.53348e-05
AF393369	adaptor-related protein complex 1, sigma 3 subunit	AP1S3	130340	1555731_a_at	-0.803472	-0.812618	-0.808294	-0.952453	2.24818	4.26795	87.7972	1.80008e-07	3.53348e-05
AW449813	SLIT and NTRK-like family, member 5	SLITRK5	26050	214930_at	-1.99993	-0.624436	-1.33824	0.950319	2.46669	6.66592	87.7422	1.80514e-07	3.53348e-05
NM_007309	diaphanous homolog 2 (Drosophila)	DIAPH2	1730	205603_s_at	-2.43538	2.22823	-1.31808	3.51886	0.225455	7.52133	87.581	1.82006e-07	3.53734e-05
NM_014875	kinesin family member 14	KIF14	9928	206364_at	-2.34657	1.36082	-1.17903	2.65378	0.909793	7.88653	86.608	1.9134e-07	3.66655e-05
U00238	phosphoribosyl pyrophosphate amidotransferase	PPAT	5471	209434_s_at	-1.5552	1.70897	-1.80465	1.54466	1.15887	7.94782	86.4048	1.93362e-07	3.67947e-05
NM_001905	CTP synthase	CTPS	1503	202613_at	-2.65458	0.281853	-0.561421	1.8477	1.70311	8.26604	86.1715	1.95716e-07	3.71133e-05
AB040910	MAP/microtubule affinity-regulating kinase 1	MARK1	4139	226653_at	-1.50224	0.597869	-1.26631	1.71126	1.00631	5.57285	85.7616	1.99937e-07	3.73944e-05
AL577977	chromosome 12 open reading frame 32	C12orf32	83695	225837_at	-1.6571	0.27861	-1.52395	2.67738	0.795282	7.7691	85.41	2.03647e-07	3.77009e-05
BE503584	phosphorylase kinase, alpha 1 (muscle)	PHKA1	5255	229876_at	-1.34171	-0.611365	-1.34049	1.57226	1.39098	6.82318	85.0391	2.0765e-07	3.81097e-05
AI672541	imprinted in Prader-Willi syndrome (non-protein coding)	IPW	3653	213447_at	-1.40705	2.75267	-1.48117	1.51822	0.464798	8.45865	84.9018	2.09156e-07	3.81097e-05
AL519818	cirrhosis, autosomal recessive 1A (cirhin)	CIRH1A	84916	224903_at	-1.41704	0.692998	-0.583103	0.798163	1.04266	9.67147	84.8848	2.09344e-07	3.81097e-05
NM_022782	M-phase phosphoprotein 9	MPHOSPH9	10198	206205_at	-1.31901	0.87614	-1.88106	1.64249	1.18601	6.51915	84.3943	2.14841e-07	3.89805e-05
BC007257	cystathionine-beta-synthase	CBS	875	1553972_a_at	-2.02629	1.76733	-1.89235	2.21393	1.22279	8.82173	84.2337	2.1668e-07	3.9184e-05
AA843962	anoctamin 5	ANO5	203859	229313_at	-2.1516	0.277461	-1.63794	0.638767	2.72523	6.96612	83.8941	2.2063e-07	3.96358e-05
NM_020445	ARP3 actin-related protein 3 homolog B (yeast)	ACTR3B	57180	218868_at	-1.93624	0.770829	-1.63416	2.04971	1.40226	7.279	83.5864	2.24286e-07	4.01604e-05
AF147445	---	---		1556824_at	2.40401	-3.06718	-0.228404	-3.44994	1.07061	8.70946	82.0657	2.43471e-07	4.27416e-05
BF062139	polymerase (RNA) III (DNA directed) polypeptide G (32kD)	POLR3G	10622	206653_at	-2.43753	2.5564	-1.41691	2.35534	0.959781	6.30184	81.7193	2.48118e-07	4.32922e-05
AI810054	DEP domain containing 1	DEPDC1	55635	235545_at	-1.96689	0.942704	-2.22005	2.73522	1.30921	7.38633	81.1676	2.55743e-07	4.43393e-05
AI971694	RNA binding motif protein, X-linked-like 1	RBMXL1	494115	227748_at	-1.17527	1.55957	-1.34649	0.572174	1.17162	7.27992	80.7668	2.61462e-07	4.47624e-05
AA045257	Pentatricopeptide repeat domain 3	PTCD3	55037	228590_at	-1.97433	0.77716	-0.488332	1.82145	0.826533	7.34385	80.2702	2.68765e-07	4.56033e-05
AA642341	G2/M-phase specific E3 ubiquitin protein ligase	G2E3	55632	223255_at	-1.45974	0.922159	-0.962367	0.979932	1.14065	7.60475	80.2626	2.68879e-07	4.56033e-05
AF394735	MAD2 mitotic arrest deficient-like 1 (yeast)	MAD2L1	4085	1554768_a_at	-1.6229	-1.41764	-2.55516	1.96087	2.49164	7.90065	79.2185	2.85069e-07	4.73539e-05
NM_006636	methylenetetrahydrofolate dehydrogenase (NADP+ dependent) 2, methenyltetrahydrofolate cyclohydrolase	MTHFD2	10797	201761_at	-1.44687	1.24464	-2.00829	1.53681	1.34631	10.6725	79.1254	2.8657e-07	4.73539e-05
AF212225	mitochondrial ribosomal protein L1	MRPL1	65008	223154_at	-0.960979	0.385942	-1.0298	-0.93578	2.14272	8.81091	79.048	2.87825e-07	4.73539e-05
NM_006780	glucuronidase, beta pseudogene	SMA4	11039	206565_x_at	-1.0033	-0.409835	-0.499596	-0.229479	1.62596	5.78726	79.0452	2.87871e-07	4.73539e-05
AF332473	carbohydrate (N-acetylgalactosamine 4-0) sulfotransferase 9	CHST9	83539	224400_s_at	-1.21417	1.00078	-1.27425	-1.10455	2.46645	5.14145	78.6016	2.95195e-07	4.78934e-05
AL534095	wntless homolog (Drosophila)	WLS	79971	228950_s_at	1.01679	-3.22861	-1.88936	-1.36822	2.23114	7.56559	78.5291	2.96412e-07	4.78934e-05
AK025298	autism susceptibility candidate 2	AUTS2	26053	212599_at	-2.19114	1.65028	-1.2205	1.96316	1.14594	8.59282	78.2682	3.00849e-07	4.80886e-05
NM_000161	GTP cyclohydrolase 1	GCH1	2643	204224_s_at	-1.93463	2.03073	-1.76743	1.87467	1.18623	6.77183	78.2035	3.01961e-07	4.80886e-05
AI761824	zinc finger protein 398	ZNF398	57541	226202_at	-1.23205	1.10945	-1.62911	3.3199	-0.264955	7.45969	78.0046	3.05412e-07	4.84868e-05
AW299520	imprinted in Prader-Willi syndrome (non-protein coding)	IPW	3653	241834_at	-1.40074	2.37108	-1.60529	2.25694	0.175942	5.83072	77.8146	3.08754e-07	4.88203e-05
BE464819	---	---		239231_at	-1.70241	2.29011	-1.25435	2.68152	-0.0124055	6.90861	77.7838	3.093e-07	4.88203e-05
AI809108	nudix (nucleoside diphosphate linked moiety X)-type motif 16	NUDT16	131870	228341_at	-1.2745	0.44525	-1.18455	1.32974	1.02929	5.53832	77.5948	3.12678e-07	4.89291e-05
NM_004856	kinesin family member 23	KIF23	9493	204709_s_at	-2.65605	1.84987	-1.95579	2.88348	1.42097	6.96047	77.346	3.1719e-07	4.93524e-05
AI625235	non-protein coding RNA 275	NCRNA00275	441951	229899_s_at	-1.21405	2.54493	-1.45136	1.17607	0.549275	6.67349	77.285	3.18307e-07	4.93856e-05
L12002	integrin, alpha 4 (antigen CD49D, alpha 4 subunit of VLA-4 receptor)	ITGA4	3676	205885_s_at	-0.745284	-0.731969	-1.0772	-0.81203	2.24876	4.44297	76.5785	3.31619e-07	5.04477e-05
NM_004270	mediator complex subunit 7	MED7	9443	204350_s_at	0.437261	0.333203	-2.44919	-0.0647942	1.12766	7.72518	76.3658	3.35758e-07	5.07943e-05
AK090649	---	---		1566084_at	-1.07027	2.12	-1.50287	2.34561	-0.198228	5.58895	76.234	3.38355e-07	5.09812e-05
AI332764	family with sequence similarity 119, member A	FAM119A	151194	235931_at	-1.59921	0.245408	-1.81697	1.47055	1.74836	7.27768	76.0717	3.41586e-07	5.12366e-05
AI823766	cyclin-dependent kinase 12	CDK12	51755	225694_at	-1.20456	1.06791	-1.43597	0.985462	1.14893	7.47923	75.6905	3.49324e-07	5.15853e-05
AA824298	Zwilch, kinetochore associated, homolog (Drosophila)	ZWILCH	55055	222606_at	-1.93893	2.16907	-0.521092	1.61196	0.488661	9.00525	75.6826	3.49488e-07	5.15853e-05
M55905	malic enzyme 2, NAD(+)-dependent, mitochondrial	ME2	4200	210154_at	-1.39788	-0.511527	-2.37043	0.521467	2.80104	7.21586	75.1657	3.6033e-07	5.28998e-05
AK024285	spermatid perinuclear RNA binding protein	STRBP	55342	223245_at	-1.77203	1.60823	-1.02887	2.17575	0.471362	7.97151	74.88	3.66501e-07	5.36614e-05
AW450929	hypothetical LOC100506653	LOC100506653	100506653	221919_at	-2.05002	0.965996	-0.830505	1.79722	1.08354	7.27627	73.946	3.87585e-07	5.54114e-05
NM_007019	ubiquitin-conjugating enzyme E2C	UBE2C	11065	202954_at	-1.95414	1.04425	-1.326	2.6015	0.755719	9.93671	73.8696	3.89374e-07	5.54416e-05
NM_012321	LSM4 homolog, U6 small nuclear RNA associated (S. cerevisiae)	LSM4	25804	202737_s_at	-1.90498	1.09369	-0.734138	1.23671	1.20537	9.67108	73.8504	3.89826e-07	5.54416e-05
BF939489	glycoprotein M6A	GPM6A	2823	209469_at	-1.34365	0.497206	-1.68291	-0.962509	2.94153	5.24549	73.521	3.97667e-07	5.58321e-05
AF183569	endoplasmic reticulum aminopeptidase 1	ERAP1	51752	209788_s_at	-0.937637	-0.492672	-1.47707	1.04529	1.38972	6.62204	73.5183	3.97732e-07	5.58321e-05
AW272333	---	---		227600_at	-1.48905	1.59865	-0.953793	0.416311	1.31448	6.32381	73.4743	3.98794e-07	5.58321e-05
NM_016220	zinc finger protein 107	ZNF107	51427	205739_x_at	-1.84292	1.63037	-1.39737	1.97394	0.915083	6.59865	73.366	4.01422e-07	5.58321e-05
NM_002539	ornithine decarboxylase 1	ODC1	4953	200790_at	-2.04023	0.493076	-0.0300586	-0.316049	2.10661	10.3063	73.3235	4.02461e-07	5.58321e-05
AI753488	glutamate-cysteine ligase, modifier subunit	GCLM	2730	236140_at	-1.23295	-0.551307	-1.82276	1.00509	1.96183	6.08988	73.1389	4.07005e-07	5.60371e-05
NM_005052	ras-related C3 botulinum toxin substrate 3 (rho family, small GTP binding protein Rac3)	RAC3	5881	206103_at	-1.03953	-1.27929	-1.72267	0.175913	2.49713	7.18643	73.0836	4.08378e-07	5.60371e-05
AW291402	forkhead box P2	FOXP2	93986	243278_at	-1.46655	-1.75178	-1.42971	-1.49312	3.99903	5.15385	72.9924	4.10657e-07	5.62085e-05
BC016767	---	---		1554599_x_at	-1.14386	0.541728	-1.29574	1.8201	0.613705	7.54861	72.8609	4.13966e-07	5.62655e-05
BF207870	---	---		241925_x_at	-0.916941	-0.819717	-1.05244	-0.562853	2.26704	4.99324	72.5683	4.21451e-07	5.69721e-05
BE930512	Mdm2 p53 binding protein homolog (mouse)	MDM2	4193	217542_at	-1.15854	1.5339	-0.949255	0.102463	1.21176	6.33285	72.5187	4.22737e-07	5.70047e-05
NM_000436	3-oxoacid CoA transferase 1	OXCT1	5019	202780_at	-1.77625	-0.443266	-0.760702	-0.62976	2.85098	8.15899	72.2292	4.30333e-07	5.74039e-05
NM_006784	WD repeat domain 3	WDR3	10885	218882_s_at	-1.88091	0.539706	-1.04858	1.37627	1.48255	9.04321	72.2059	4.30952e-07	5.74039e-05
R41498	leucine rich repeat containing 8 family, member B	LRRC8B	23507	212976_at	-1.33124	0.694268	-1.23966	1.04549	1.22926	5.8193	71.9812	4.36975e-07	5.76028e-05
AA725246	---	---		231311_at	-1.6314	-0.386632	-1.03188	1.27359	1.59913	5.5718	71.9781	4.37059e-07	5.76028e-05
AF225416	SPC25, NDC80 kinetochore complex component, homolog (S. cerevisiae)	SPC25	57405	209891_at	-2.23	0.971201	-1.8657	2.48481	1.49352	6.55308	71.926	4.38468e-07	5.76028e-05
BG054916	patched 1	PTCH1	5727	209815_at	-1.78445	0.75608	-1.03877	3.12674	0.140447	8.14477	71.9242	4.38519e-07	5.76028e-05
D32051	phosphoribosylglycinamide formyltransferase, phosphoribosylglycinamide synthetase, phosphoribosylaminoimidazole synthetase	GART	2618	210005_at	-2.29526	1.1942	-1.17506	1.72749	1.5289	6.63842	71.8833	4.39629e-07	5.76028e-05
T87730	---	---		242500_at	-0.875309	-0.692166	-0.519945	-0.893623	2.04841	5.79896	71.7641	4.4289e-07	5.76028e-05
NM_030577	transmembrane protein 177	TMEM177	80775	218897_at	-1.73006	1.1873	-1.32314	1.38881	1.29051	7.23441	71.738	4.43609e-07	5.76028e-05
BE677308	zinc finger, X-linked, duplicated B	ZXDB	158586	228005_at	-1.41454	-0.206792	-0.791563	1.27156	1.16348	7.3034	71.7289	4.43857e-07	5.76028e-05
N64622	ERI1 exoribonuclease family member 2	ERI2	112479	213365_at	-1.33938	0.749445	-1.0563	0.46001	1.48709	7.38873	71.709	4.44408e-07	5.76028e-05
AJ006835	small nucleolar RNA host gene 3 (non-protein coding)	SNHG3	8420	215011_at	-1.42314	1.39171	-1.59714	2.05568	0.653545	6.47314	71.6985	4.44698e-07	5.76028e-05
BE622627	phosphoinositide-3-kinase, regulatory subunit 3 (gamma)	PIK3R3	8503	202743_at	-1.84763	-0.679644	-1.13937	0.732888	2.34516	7.57543	71.4616	4.51297e-07	5.76028e-05
AI431643	related RAS viral (r-ras) oncogene homolog 2	RRAS2	22800	212590_at	-1.63136	1.72153	-1.89862	1.5361	1.2992	8.49385	71.4519	4.51569e-07	5.76028e-05
AF136972	protein phosphatase, Mg2+/Mn2+ dependent, 1B	PPM1B	5495	209296_at	-1.34905	2.74741	-1.31724	1.98674	-0.0130884	8.96491	71.4167	4.5256e-07	5.76028e-05
AF336127	solute carrier family 4, sodium borate transporter, member 11	SLC4A11	83959	223748_at	-2.21798	1.97549	-0.748922	1.44006	1.09872	7.80903	71.4008	4.53008e-07	5.76028e-05
BF675750	phosphodiesterase 12	PDE12	201626	231839_at	-1.2962	0.626164	-0.874087	0.810642	1.12977	8.29595	71.3481	4.545e-07	5.76028e-05
N90719	---	---		242245_at	-2.01952	0.897898	-1.10661	1.9571	1.15322	6.0575	71.301	4.55837e-07	5.76028e-05
BC001052	RecQ protein-like (DNA helicase Q1-like)	RECQL	5965	210568_s_at	-1.10873	0.594373	-1.68691	1.8589	0.795943	7.06515	71.2	4.58722e-07	5.76028e-05
NM_020183	aryl hydrocarbon receptor nuclear translocator-like 2	ARNTL2	56938	220658_s_at	-1.38365	-0.471871	-1.39335	1.92838	1.18426	5.91041	71.1818	4.59244e-07	5.76028e-05
R46180	glycerophosphodiester phosphodiesterase domain containing 1	GDPD1	284161	238681_at	-1.2176	0.0236901	-1.25864	0.642141	1.6207	5.90934	71.1709	4.59558e-07	5.76028e-05
D89976	5-aminoimidazole-4-carboxamide ribonucleotide formyltransferase/IMP cyclohydrolase	ATIC	471	208758_at	-1.55267	0.546732	-1.22506	1.73112	1.03306	10.2305	71.1627	4.59795e-07	5.76028e-05
AW009436	Chromosome 1 open reading frame 104	C1orf104	284618	230256_at	-1.5692	-0.0405526	-1.25187	2.30796	0.878659	6.53656	71.095	4.61745e-07	5.77055e-05
AF129536	F-box protein 6	FBXO6	26270	231769_at	-0.590663	-1.30274	-1.16486	-0.518986	2.14748	5.48688	70.9096	4.67141e-07	5.819e-05
AI672489	core 1 synthase, glycoprotein-N-acetylgalactosamine 3-beta-galactosyltransferase, 1	C1GALT1	56913	226105_at	-1.19167	1.48704	-1.64817	1.44627	0.830587	7.27972	70.8417	4.69139e-07	5.819e-05
AA029500	phospholipase D family, member 6	PLD6	201164	227037_at	-0.467502	-1.62833	-0.473228	-1.10039	2.05936	7.28823	70.7804	4.7095e-07	5.819e-05
AI769688	ATPase, aminophospholipid transporter (APLT), class I, type 8A, member 1	ATP8A1	10396	213106_at	-1.71426	0.469404	-0.194622	-0.127329	1.77242	7.6599	70.473	4.80156e-07	5.90602e-05
M74088	adenomatous polyposis coli	APC	324	203526_s_at	-0.920043	-0.67843	-1.34291	-0.730432	2.52842	5.55709	70.1814	4.89096e-07	5.99078e-05
AF059752	mannose-P-dolichol utilization defect 1	MPDU1	9526	209208_at	-0.494802	-2.22574	-2.01895	0.61539	2.17242	7.53982	70.1112	4.91279e-07	5.99078e-05
NM_006295	valyl-tRNA synthetase	VARS	7407	201797_s_at	-1.16902	0.639512	-1.55399	0.400136	1.72509	7.96801	70.1056	4.91452e-07	5.99078e-05
NM_003158	aurora kinase A	AURKA	6790	208079_s_at	-2.41715	1.61625	-0.516025	2.14566	0.791976	9.10724	70.0711	4.92531e-07	5.99078e-05
BC042378	---	---		1556328_at	-0.910497	-0.765763	-1.12895	-1.38784	2.84361	4.57431	69.7713	5.02011e-07	6.06556e-05
AW873348	quiescin Q6 sulfhydryl oxidase 2	QSOX2	169714	227146_at	-0.995023	0.513323	-1.16332	1.15029	0.832607	8.61662	69.365	5.1522e-07	6.19034e-05
AF274950	chromosome 12 open reading frame 11	C12orf11	55726	221652_s_at	-1.49169	1.07804	-1.96036	1.78954	1.24622	9.73468	69.3635	5.1527e-07	6.19034e-05
NM_005057	retinoblastoma binding protein 5	RBBP5	5929	205169_at	-0.944221	-0.865907	-1.54521	1.56893	1.21705	6.79199	69.2335	5.19586e-07	6.21426e-05
AB005289	ATP-binding cassette, sub-family B (MDR/TAP), member 7	ABCB7	22	209620_s_at	-1.32109	0.473755	-1.10023	1.8331	0.674585	8.42573	69.0517	5.25697e-07	6.21426e-05
NM_003384	vaccinia related kinase 1	VRK1	7443	203856_at	-2.67152	1.65641	-1.23752	1.66631	1.83352	8.05937	68.7701	5.35335e-07	6.29287e-05
AL522406	chromosome 13 open reading frame 23	C13orf23	80209	225887_at	-2.14457	1.75315	-2.53835	2.8439	1.35649	7.67567	68.6955	5.37923e-07	6.3042e-05
BC045709	gamma-aminobutyric acid (GABA) A receptor, gamma 3	GABRG3	2567	1555517_at	-0.600945	-0.77419	-0.6697	-0.753459	1.80778	4.32314	68.5448	5.43202e-07	6.35243e-05
AI825937	echinoderm microtubule associated protein like 1	EML1	2009	204796_at	-1.30898	0.96748	-1.11065	0.630026	1.3069	5.71847	68.3143	5.51395e-07	6.4071e-05
BC015866	---	---		1555461_at	-1.60781	-0.12833	-1.00964	0.461974	2.0157	6.27814	68.1998	5.55518e-07	6.42765e-05
AJ130971	small nuclear ribonucleoprotein polypeptide A'	SNRPA1	6627	215722_s_at	-1.01035	0.987426	-1.58723	1.19892	0.940087	8.21634	68.0841	5.59728e-07	6.45519e-05
BC030758	chromosome 22 open reading frame 39	C22orf39	128977	1553974_at	-1.86253	-0.589822	-0.645235	1.23613	1.66521	6.56831	68.0695	5.60262e-07	6.45519e-05
AI919519	---	---		235092_at	-0.68092	-0.503635	-0.666794	-0.798658	1.82577	4.86389	67.9463	5.64789e-07	6.48001e-05
AU153330	activating signal cointegrator 1 complex subunit 3	ASCC3	10973	231269_at	-1.65292	2.79376	-2.11229	0.942221	1.50172	6.54632	67.8349	5.68921e-07	6.4935e-05
AI291720	DPH5 homolog (S. cerevisiae)	DPH5	51611	222360_at	-1.57242	1.7706	-1.30086	1.35886	0.94356	6.17503	67.7453	5.72274e-07	6.49818e-05
AI754871	spermatogenesis associated 5	SPATA5	166378	229075_at	-1.73817	1.83232	-1.7735	0.868605	1.73066	5.74511	67.6218	5.76932e-07	6.51099e-05
AI559300	spermatogenesis associated 18 homolog (rat)	SPATA18	132671	229331_at	-1.16313	-0.51106	-1.22906	-0.612109	2.56093	5.14888	67.4264	5.84396e-07	6.55352e-05
AA115106	neuronal growth regulator 1	NEGR1	257194	243357_at	-0.410199	-1.21402	-0.659467	-1.36128	2.16204	5.24438	67.3463	5.87491e-07	6.57472e-05
AK094613	Ribosomal protein S24	RPS24	6229	1555878_at	-2.02238	2.85065	-2.0611	1.51701	1.43489	6.99757	67.3024	5.89195e-07	6.58031e-05
AF303588	opsin 3	OPN3	23596	224392_s_at	-1.13176	-1.08517	-0.751549	2.52127	0.313668	7.04962	67.2668	5.90582e-07	6.58234e-05
BC034978	phosphodiesterase 12	PDE12	201626	1554915_a_at	-1.34488	0.131906	-1.37415	0.625014	1.80033	5.05414	67.051	5.99071e-07	6.63633e-05
AU132789	zinc finger protein 273	ZNF273	10793	215239_x_at	-1.6595	1.78	-1.41399	2.27854	0.489802	6.11919	67.0164	6.00443e-07	6.63806e-05
AW303539	Lyrm7 homolog (mouse)	LYRM7	90624	239960_x_at	-0.949875	0.914514	-1.12045	-0.779313	1.91154	5.16036	66.9234	6.04162e-07	6.65223e-05
NM_021242	MID1 interacting protein 1 (gastrulation specific G12 homolog (zebrafish))	MID1IP1	58526	218251_at	-1.13479	0.537875	-1.15093	0.869556	1.14308	7.41859	66.7624	6.10658e-07	6.68334e-05
AI081356	LAG1 homolog, ceramide synthase 6	LASS6	253782	235463_s_at	-1.00556	0.737975	-1.23414	0.230976	1.42834	6.04103	66.3438	6.27952e-07	6.80047e-05
BC004284	ribosomal protein L27a	RPL27A	6157	223707_at	-1.34714	-0.62525	-0.924553	-1.10586	2.90917	6.40428	66.2182	6.33258e-07	6.82133e-05
BF540749	transmembrane 7 superfamily member 3	TM7SF3	51768	226478_at	-1.74669	0.879768	-2.33097	2.32711	1.456	7.05564	66.0827	6.39041e-07	6.86946e-05
AI967971	polyribonucleotide nucleotidyltransferase 1	PNPT1	87178	225291_at	-2.22274	1.30418	-1.69922	1.51974	1.90767	8.6936	66.0548	6.40243e-07	6.86946e-05
AI867102	nucleoporin 210kDa	NUP210	23225	213947_s_at	-1.88047	0.52448	-0.96301	1.40774	1.40915	8.15341	66.0231	6.4161e-07	6.87063e-05
NM_006773	DEAD (Asp-Glu-Ala-Asp) box polypeptide 18	DDX18	8886	205763_s_at	-0.886176	1.10615	-2.17488	1.25468	1.13093	7.4894	65.7461	6.53692e-07	6.97024e-05
AW195586	ADAM metallopeptidase domain 1, pseudogene	ADAM1	8759	228925_at	-1.78469	2.30956	-1.3274	1.38358	0.977386	5.61986	65.6498	6.57961e-07	6.9823e-05
BC000460	sparc/osteonectin, cwcv and kazal-like domains proteoglycan (testican) 3	SPOCK3	50859	206433_s_at	-0.907925	-0.99364	-0.580991	-1.08312	2.34855	4.76708	65.6191	6.59329e-07	6.9823e-05
AI721219	TNF receptor-associated factor 3	TRAF3	7187	221571_at	-0.872466	-0.26356	-0.898445	-0.129393	1.64555	7.747	65.6106	6.59708e-07	6.9823e-05
NM_018119	polymerase (RNA) III (DNA directed) polypeptide E (80kD)	POLR3E	55718	218016_s_at	-1.58816	0.664917	-1.29545	1.61895	1.15085	8.29393	65.415	6.68506e-07	7.06173e-05
BG492376	hypothetical protein LOC100127983	LOC100127983	100127983	1557961_s_at	-0.832745	0.0451967	-0.939551	-0.727991	1.92937	6.51357	65.2942	6.74014e-07	7.07883e-05
AW051349	cyclin-dependent kinase 6	CDK6	1021	224847_at	-0.795526	-1.37019	-1.32914	-0.538772	2.49753	8.86983	65.104	6.82794e-07	7.1076e-05
AU144571	RNA binding motif protein 26	RBM26	64062	229433_at	-0.561364	0.423489	-1.62852	0.975209	0.855743	6.27154	65.094	6.8326e-07	7.1076e-05
NM_020143	partner of NOB1 homolog (S. cerevisiae)	PNO1	56902	203622_s_at	-1.36663	0.115837	-1.88163	0.907945	1.97714	8.14446	65.0554	6.8506e-07	7.10993e-05
BC005954	NADH dehydrogenase (ubiquinone) Fe-S protein 7, 20kDa (NADH-coenzyme Q reductase)	NDUFS7	374291	211752_s_at	-0.376352	-0.48213	-1.63372	0.952204	0.991409	9.25006	64.8137	6.96465e-07	7.19018e-05
NM_017897	3-oxoacyl-ACP synthase, mitochondrial	OXSM	54995	219133_at	-0.205243	-0.326814	-0.223234	-1.23659	1.2874	7.41896	64.7534	6.99348e-07	7.20631e-05
AW874263	poly (ADP-ribose) polymerase family, member 8	PARP8	79668	244008_at	-0.943676	-0.180513	-0.710225	-0.744333	1.97355	6.55147	64.5466	7.09343e-07	7.25258e-05
NM_018126	transmembrane protein 33	TMEM33	55161	218465_at	-1.46411	1.48913	-1.85933	0.474097	1.89122	7.57535	64.2963	7.21671e-07	7.25831e-05
AI457120	phosphoribosyl pyrophosphate amidotransferase	PPAT	5471	209433_s_at	-2.03691	1.61329	-1.23062	1.69307	1.19085	8.83763	64.1355	7.29734e-07	7.28294e-05
AL044326	phosphoribosylformylglycinamidine synthase	PFAS	5198	213302_at	-2.78312	1.77757	-0.824935	0.76459	2.23082	8.19102	64.1146	7.30788e-07	7.28294e-05
AA603041	hypothetical LOC150381	LOC150381	150381	238058_at	-0.901105	-1.65161	-0.213818	-2.20783	3.06607	6.43164	64.0652	7.33291e-07	7.29457e-05
NM_145032	F-box and leucine-rich repeat protein 13	FBXL13	222235	1553798_a_at	-0.901333	-0.88942	-0.903125	-1.14106	2.5606	5.11722	63.8661	7.43479e-07	7.36908e-05
AA020920	testis expressed 9	TEX9	374618	243198_at	-1.05985	0.422817	-1.06661	-0.778072	2.1487	5.20172	63.6441	7.5505e-07	7.47021e-05
AB023420	heat shock 70kDa protein 4	HSPA4	3308	208815_x_at	-1.26126	1.41217	-1.04911	1.09384	0.760713	9.71128	63.4781	7.63842e-07	7.50359e-05
N51263	alkaline ceramidase 3	ACER3	55331	222689_at	-1.22859	0.653976	-1.16523	0.550319	1.42054	6.07656	63.4766	7.6392e-07	7.50359e-05
NM_018057	solute carrier family 6 (neutral amino acid transporter), member 15	SLC6A15	55117	206376_at	-1.37911	-0.899427	-1.88657	-0.506216	3.27411	6.62325	63.3787	7.69163e-07	7.54152e-05
AW138134	PHD finger protein 17	PHF17	79960	225816_at	-1.8944	2.59757	-1.293	2.29781	0.358674	8.13861	63.2904	7.73936e-07	7.57472e-05
BC005004	family with sequence similarity 64, member A	FAM64A	54478	221591_s_at	-1.26801	1.48367	-1.02182	1.39108	0.527286	8.17041	63.158	7.81153e-07	7.60448e-05
BC003573	farnesyl-diphosphate farnesyltransferase 1	FDFT1	2222	210950_s_at	-0.883695	-0.175896	-2.38525	2.2967	1.00136	10.0792	63.0813	7.85368e-07	7.61835e-05
NM_031217	kinesin family member 18A	KIF18A	81930	221258_s_at	-1.22004	0.584408	-1.86349	1.52436	1.25133	6.37247	62.9736	7.91342e-07	7.66268e-05
BC004291	synaptotagmin XI	SYT11	23208	209198_s_at	-0.942147	-1.24122	-0.86609	-0.050739	1.96711	5.56913	62.8622	7.97572e-07	7.68634e-05
AI339426	small nucleolar RNA host gene 12 (non-protein coding)	SNHG12	85028	228990_at	-1.31923	0.954346	-2.12006	1.6764	1.29689	7.12654	62.774	8.02548e-07	7.68634e-05
AI669535	hypothetical protein LOC729680	LOC729680	729680	228977_at	-1.68714	-1.20112	-1.59325	1.46151	2.17535	6.93905	62.7234	8.05424e-07	7.68634e-05
NM_012254	solute carrier family 27 (fatty acid transporter), member 5	SLC27A5	10998	219733_s_at	-0.787316	-0.25938	-1.1514	0.0710954	1.59398	7.48806	62.6904	8.07303e-07	7.68634e-05
NM_024590	arylsulfatase family, member J	ARSJ	79642	219973_at	-0.5687	-1.25014	-0.719259	-0.0695255	1.51127	5.40283	62.688	8.07439e-07	7.68634e-05
AI743740	La ribonucleoprotein domain family, member 4	LARP4	113251	214155_s_at	-2.13699	1.7881	-1.46261	1.38723	1.59121	5.90417	62.3864	8.24882e-07	7.79297e-05
NM_022346	non-SMC condensin I complex, subunit G	NCAPG	64151	218662_s_at	-2.73593	0.978664	-0.522732	2.2772	1.24006	8.16915	62.3639	8.262e-07	7.79297e-05
AU145049	huntingtin interacting protein 1	HIP1	3092	226364_at	-1.23063	1.72881	-1.25353	2.03911	0.130639	7.60033	62.1606	8.38237e-07	7.81055e-05
NM_001813	centromere protein E, 312kDa	CENPE	1062	205046_at	-1.69293	1.10139	-1.4988	1.46925	1.3455	7.54263	62.1566	8.38478e-07	7.81055e-05
AV699857	ribulose-5-phosphate-3-epimerase	RPE	6120	225039_at	-0.90565	0.608227	-2.00054	1.35765	1.1315	7.8104	62.1482	8.38979e-07	7.81055e-05
NM_004728	DEAD (Asp-Glu-Ala-Asp) box polypeptide 21	DDX21	9188	208152_s_at	-1.17836	1.64118	-1.76636	0.5585	1.43654	10.3621	62.1411	8.39404e-07	7.81055e-05
M65254	protein phosphatase 2, regulatory subunit A, beta	PPP2R1B	5519	202886_s_at	-0.729823	0.166113	-1.07711	-0.0219559	1.40717	6.24981	62.082	8.42948e-07	7.81055e-05
NM_019049	DENN/MADD domain containing 1B	DENND1B	163486	219696_at	-0.968912	-1.46274	-1.02139	0.930686	1.51696	6.55161	62.0795	8.43097e-07	7.81055e-05
AW193600	hypothetical LOC439949	LOC439949	439949	232001_at	-1.30704	2.37894	-0.9357	0.992449	0.476228	6.58019	62.0736	8.43454e-07	7.81055e-05
NM_017412	frizzled homolog 3 (Drosophila)	FZD3	7976	219683_at	-1.10562	0.599286	-1.41628	1.45113	0.882624	6.30143	61.9957	8.48157e-07	7.8367e-05
U21915	general transcription factor IIH, polypeptide 2B	GTF2H2B	653238	215470_at	-1.40956	0.381828	-1.18646	1.89159	0.812197	6.53187	61.9737	8.49491e-07	7.8367e-05
NM_004446	glutamyl-prolyl-tRNA synthetase	EPRS	2058	200843_s_at	-0.993733	0.740253	-1.40388	1.53154	0.661873	9.84291	61.8463	8.57269e-07	7.8947e-05
AW006938	neurolysin (metallopeptidase M3 family)	NLN	57486	225944_at	-1.63567	2.69468	-1.40867	0.90884	1.07067	6.81455	61.6387	8.7013e-07	7.94655e-05
AI808395	NADH dehydrogenase (ubiquinone) Fe-S protein 1, 75kDa (NADH-coenzyme Q reductase)	NDUFS1	4719	236356_at	-1.52743	0.937391	-1.22863	0.565798	1.65685	6.26038	61.4716	8.8065e-07	8.02099e-05
AK022853	solute carrier family 6 (neutral amino acid transporter), member 15	SLC6A15	55117	232263_at	-1.64681	1.20404	-1.5198	1.21627	1.44782	6.24458	61.3889	8.85919e-07	8.03699e-05
NM_004280	eukaryotic translation elongation factor 1 epsilon 1	EEF1E1	9521	204905_s_at	-1.37768	0.74161	-2.17999	1.32467	1.70068	8.6697	61.1518	9.01229e-07	8.13259e-05
AK022964	HAUS augmin-like complex, subunit 6	HAUS6	54801	233655_s_at	-1.65726	0.387397	-1.78608	2.14923	1.28603	5.87425	61.1121	9.03823e-07	8.13259e-05
BG025248	patatin-like phospholipase domain containing 8	PNPLA8	50640	223309_x_at	-0.475729	-1.1674	-1.03542	0.0151778	1.54502	8.51171	61.0492	9.07952e-07	8.14371e-05
BG500611	Yip1 domain family, member 6	YIPF6	286451	212342_at	-0.712073	-0.115937	-1.68649	1.37671	0.957239	6.82454	61.005	9.10867e-07	8.14371e-05
BF214329	mitochondrial fission regulator 1	MTFR1	9650	203207_s_at	-1.37851	0.607247	-1.98952	1.62359	1.42005	7.00461	61.0014	9.11103e-07	8.14371e-05
NM_018846	kelch-like 7 (Drosophila)	KLHL7	55975	220238_s_at	-1.7115	1.17465	-2.336	2.71602	1.06661	5.84436	60.837	9.22053e-07	8.2147e-05
U77949	cell division cycle 6 homolog (S. cerevisiae)	CDC6	990	203967_at	-1.86283	0.715046	-1.78036	1.59115	1.75062	5.89103	60.7159	9.30221e-07	8.26977e-05
NM_024622	FAST kinase domains 1	FASTKD1	79675	219002_at	-1.98501	1.38857	-0.405719	1.76	0.619301	8.83394	60.3164	9.578e-07	8.40724e-05
BC001811	RRS1 ribosome biogenesis regulator homolog (S. cerevisiae)	RRS1	23212	209567_at	-1.99456	0.840088	-0.782375	1.08043	1.51582	8.73346	60.3148	9.57906e-07	8.40724e-05
N22849	---	---		230300_at	-1.19341	0.610679	-0.870564	0.123509	1.48788	5.35238	60.2985	9.59059e-07	8.40724e-05
NM_024745	SHC SH2-domain binding protein 1	SHCBP1	79801	219493_at	-1.79602	0.768109	-1.70049	1.19279	1.87845	6.33872	60.1609	9.68799e-07	8.45387e-05
NM_018183	strawberry notch homolog 1 (Drosophila)	SBNO1	55206	218737_at	-1.16223	0.429809	-1.63527	1.65792	1.00385	6.50115	60.1578	9.69023e-07	8.45387e-05
T79568	regulation of nuclear pre-mRNA domain containing 1A	RPRD1A	55197	222558_at	-0.918381	0.00562418	-2.36828	1.15958	1.72231	6.22349	60.0691	9.75367e-07	8.47896e-05
NM_014379	potassium channel, subfamily V, member 1	KCNV1	27012	220294_at	-0.979184	-1.13223	-0.814807	-1.19924	2.69929	4.59171	60.0204	9.78876e-07	8.47896e-05
AK001419	feline leukemia virus subgroup C cellular receptor 1	FLVCR1	28982	222906_at	-2.44286	2.87218	-1.27882	1.95542	1.0344	7.46168	59.8439	9.91705e-07	8.5262e-05
AA017721	fucosyltransferase 9 (alpha (1,3) fucosyltransferase)	FUT9	10690	214046_at	-1.58219	0.180842	-1.80786	0.363808	2.48461	5.67703	59.8077	9.94364e-07	8.5262e-05
NM_014393	staufen, RNA binding protein, homolog 2 (Drosophila)	STAU2	27067	204226_at	-1.31231	-0.0880856	-1.35813	0.674856	1.79719	7.33449	59.7851	9.96032e-07	8.5262e-05
NM_017775	tetratricopeptide repeat domain 19	TTC19	54902	217964_at	-1.17768	0.85697	-1.29873	1.22508	0.941123	9.66354	59.7426	9.9917e-07	8.5262e-05
AW024563	gem (nuclear organelle) associated protein 5	GEMIN5	25929	225712_at	-1.03175	0.70967	-1.84978	0.438915	1.73577	7.94683	59.6742	1.00424e-06	8.55609e-05
AW025023	ribosomal protein S6 kinase, 90kDa, polypeptide 6	RPS6KA6	27330	228503_at	-0.925328	0.195805	-1.39199	1.00226	1.11988	6.13944	59.6286	1.00765e-06	8.57173e-05
BF979497	squalene epoxidase	SQLE	6713	213562_s_at	-1.28302	-0.714255	-1.41064	1.65876	1.35568	5.47049	59.5779	1.01144e-06	8.57749e-05
AA927701	heat shock 70kDa protein 9 (mortalin)	HSPA9	3313	200690_at	-1.46126	0.473544	-0.938042	1.27837	1.07652	7.77311	59.5776	1.01146e-06	8.57749e-05
BE886288	---	---		241687_at	-1.04234	0.491736	-0.811075	1.60423	0.349662	6.24501	59.4046	1.02456e-06	8.63864e-05
BE256479	heat shock 60kDa protein 1 (chaperonin)	HSPD1	3329	200806_s_at	-1.57589	-0.0557541	-3.03116	2.17086	2.168	10.4222	59.3747	1.02684e-06	8.63864e-05
NM_020156	core 1 synthase, glycoprotein-N-acetylgalactosamine 3-beta-galactosyltransferase, 1	C1GALT1	56913	219439_at	-1.77941	1.05227	-1.62618	1.88414	1.25668	7.94352	59.3571	1.02818e-06	8.63864e-05
NM_017835	chromosome 21 open reading frame 59	C21orf59	56683	218123_at	-1.21072	0.175406	-1.13206	1.45873	0.934475	8.98894	59.3416	1.02938e-06	8.63864e-05
BQ219651	---	---		1558078_at	-0.896922	1.52714	-1.09023	1.10879	0.375502	5.91123	59.3101	1.0318e-06	8.63864e-05
AK025416	UDP-glucose glycoprotein glucosyltransferase 1	UGGT1	56886	231968_at	-1.32749	1.14576	-0.71215	0.764082	0.910945	8.80495	59.3098	1.03182e-06	8.63864e-05
AV706522	protein phosphatase, Mg2+/Mn2+ dependent, 1K	PPM1K	152926	235061_at	-1.6743	0.126755	-0.46777	-0.459448	2.25019	6.96974	58.9136	1.06285e-06	8.80813e-05
NM_005998	chaperonin containing TCP1, subunit 3 (gamma)	CCT3	7203	200910_at	-1.54543	0.772365	-0.963125	0.95662	1.29231	11.0828	58.6722	1.08232e-06	8.88706e-05
AI017564	WD repeat domain 67	WDR67	93594	214061_at	-1.58305	1.56351	-1.03883	1.48998	0.76111	6.4189	58.638	1.08511e-06	8.88706e-05
AI625022	family with sequence similarity 119, member A	FAM119A	151194	235177_at	-2.39	1.48263	-1.49189	1.56694	1.84576	7.52006	58.62	1.08659e-06	8.88706e-05
H10661	HIG1 hypoxia inducible domain family, member 1A	HIGD1A	25994	242317_at	-1.16736	0.423264	-1.80236	1.00798	1.55586	6.03079	58.6106	1.08735e-06	8.88706e-05
AI888657	TTC28 antisense RNA (non-protein coding)	TTC28-AS	284900	244189_at	-1.438	1.06027	-1.35878	1.5797	0.937295	6.8037	58.5948	1.08865e-06	8.88706e-05
NM_018123	asp (abnormal spindle) homolog, microcephaly associated (Drosophila)	ASPM	259266	219918_s_at	-2.3105	1.58148	-1.70118	2.22994	1.43084	8.08271	58.5403	1.09314e-06	8.9104e-05
AI224977	chromosome 12 open reading frame 48	C12orf48	55010	227928_at	-1.76809	1.20572	-1.69817	1.54337	1.46939	5.80908	58.4758	1.09848e-06	8.9302e-05
NM_005886	katanin p80 (WD repeat containing) subunit B 1	KATNB1	10300	203162_s_at	-1.19276	0.527818	-0.362253	-0.213534	1.40068	8.53947	58.4128	1.10372e-06	8.9302e-05
N50034	myelin expression factor 2	MYEF2	50804	229464_at	-2.18171	0.65557	-1.12409	2.05371	1.34344	7.28149	58.4125	1.10375e-06	8.9302e-05
AF139625	centromere protein J	CENPJ	55835	223513_at	-2.55352	0.493535	-1.45411	0.940352	2.73152	8.02576	58.3814	1.10635e-06	8.93805e-05
T16257	G protein-coupled receptor 37 (endothelin receptor type B-like)	GPR37	2861	214586_at	-0.965469	-0.791111	-0.843682	-0.117628	1.87005	4.60015	58.32	1.1115e-06	8.94789e-05
NM_013976	glutaryl-CoA dehydrogenase	GCDH	2639	208369_s_at	-1.40706	0.126901	-1.34768	0.934513	1.6402	6.69626	58.3101	1.11234e-06	8.94789e-05
AU154086	F-box protein 28	FBXO28	23219	1555971_s_at	-1.02051	1.71632	-1.76649	1.61111	0.551989	7.89161	58.2932	1.11376e-06	8.94789e-05
AV723167	synaptotagmin I	SYT1	6857	203998_s_at	-1.6434	0.982064	-1.53642	-0.0430092	2.369	5.78403	58.2468	1.11769e-06	8.94789e-05
BG104571	transmembrane 9 superfamily member 3	TM9SF3	56889	222399_s_at	-0.109012	-0.0864085	-2.0072	0.0157725	1.46543	9.65047	58.1519	1.12577e-06	8.94789e-05
AF043294	budding uninhibited by benzimidazoles 1 homolog (yeast)	BUB1	699	209642_at	-2.17995	1.9433	-2.16419	2.92982	1.02176	7.39247	58.1462	1.12626e-06	8.94789e-05
NM_006555	YKT6 v-SNARE homolog (S. cerevisiae)	YKT6	10652	217785_s_at	-0.726959	-0.910291	-0.9456	0.658277	1.22194	5.90207	58.1295	1.1277e-06	8.94789e-05
BG291787	importin 7	IPO7	10527	200994_at	-1.44246	0.997961	-1.13201	1.24532	1.03427	10.6128	58.1288	1.12775e-06	8.94789e-05
AW574798	kelch-like 6 (Drosophila)	KLHL6	89857	228167_at	-0.706394	-0.87877	-0.847675	-1.09746	2.29607	4.4437	58.0967	1.13051e-06	8.94789e-05
NM_018482	ArfGAP with SH3 domain, ankyrin repeat and PH domain 1	ASAP1	50807	221039_s_at	-0.356953	-1.19655	-1.97879	0.769195	1.5622	6.80995	57.5332	1.18024e-06	9.27394e-05
BC005176	transmembrane 7 superfamily member 3	TM7SF3	51768	222477_s_at	-1.14582	0.375517	-1.6377	1.45022	1.14563	9.30466	57.515	1.18189e-06	9.27394e-05
NM_003211	thymine-DNA glycosylase	TDG	6996	203743_s_at	-0.990057	0.855952	-0.937866	0.410417	1.05637	9.70271	57.2425	1.20695e-06	9.42992e-05
NM_016542	serine/threonine protein kinase MST4	MST4	51765	218499_at	-2.35717	1.7448	-1.3714	1.15848	1.91752	9.64393	57.1102	1.21934e-06	9.48604e-05
NM_013379	dipeptidyl-peptidase 7	DPP7	29952	224814_at	-0.318277	-1.18591	-0.693575	-0.296439	1.37359	8.14082	57.0394	1.22604e-06	9.51816e-05
AW008531	nucleoporin 205kDa	NUP205	23165	212247_at	-1.29127	1.07685	-1.3574	1.97307	0.521875	8.97745	57.0038	1.22942e-06	9.51816e-05
NM_003318	TTK protein kinase	TTK	7272	204822_at	-2.66844	1.82209	-0.545048	1.89838	1.15886	7.93093	56.9302	1.23646e-06	9.54504e-05
AF252283	kelch-like 1 (Drosophila)	KLHL1	57626	223810_at	-0.703263	-0.918229	-0.618785	-1.02023	2.10202	4.17185	56.888	1.24051e-06	9.54504e-05
BC005258	cell division cycle 23 homolog (S. cerevisiae)	CDC23	8697	223651_x_at	-1.16351	-0.250002	-1.2226	0.460789	1.75472	5.65877	56.7489	1.25399e-06	9.60285e-05
NM_014788	tripartite motif-containing 14	TRIM14	9830	203148_s_at	-2.40722	0.838449	-1.28088	1.28113	2.12757	7.3229	56.7338	1.25546e-06	9.60285e-05
BC033780	zinc binding alcohol dehydrogenase domain containing 2	ZADH2	284273	1554239_s_at	0.10281	-1.63396	-0.022391	-1.1495	1.22311	6.98854	56.6989	1.25888e-06	9.61552e-05
AI924134	---	---		242787_at	-1.54782	0.261777	-1.75927	2.09208	1.23869	6.27379	56.562	1.27238e-06	9.67227e-05
NM_005566	lactate dehydrogenase A	LDHA	3939	200650_s_at	1.1176	-0.305912	-0.442282	-2.09102	0.673235	12.8038	56.5382	1.27474e-06	9.67227e-05
NM_001325	cleavage stimulation factor, 3' pre-RNA, subunit 2, 64kDa	CSTF2	1478	204459_at	-1.13108	0.154177	-0.946453	1.47343	0.728372	7.6285	56.534	1.27516e-06	9.67227e-05
H16791	Fatty acyl CoA reductase 2	FAR2	55711	239108_at	-1.446	1.61202	-1.28448	2.68232	-0.023237	5.7605	56.5004	1.27851e-06	9.68425e-05
NM_002764	phosphoribosyl pyrophosphate synthetase 1	PRPS1	5631	208447_s_at	-1.92962	0.406761	-2.0881	2.6299	1.43283	6.82491	56.269	1.30188e-06	9.77691e-05
NM_001827	CDC28 protein kinase regulatory subunit 2	CKS2	1164	204170_s_at	-1.66827	0.803818	-1.50974	2.02176	1.05899	11.0967	56.2475	1.30408e-06	9.77691e-05
M55905	malic enzyme 2, NAD(+)-dependent, mitochondrial	ME2	4200	210153_s_at	-0.768541	-0.478117	-1.86326	0.205162	2.03331	8.89539	56.2176	1.30714e-06	9.77691e-05
AI884890	oxysterol binding protein-like 11	OSBPL11	114885	222586_s_at	-1.44129	-0.504059	-1.32573	0.0392211	2.46698	6.99235	56.1698	1.31206e-06	9.77691e-05
BC001605	phosphoribosyl pyrophosphate synthetase 1	PRPS1	5631	209440_at	-1.81096	1.5352	-0.784037	2.10203	0.42056	9.28265	56.162	1.31286e-06	9.77691e-05
BF676980	glutamate-cysteine ligase, catalytic subunit	GCLC	2729	202922_at	-1.01559	1.3489	-1.25755	1.00749	0.73267	7.74836	56.0562	1.32383e-06	9.83651e-05
AU158936	actin related protein 2/3 complex, subunit 5-like	ARPC5L	81873	226914_at	-1.02372	0.646158	-0.949352	1.14854	0.675543	7.76295	56.0355	1.32598e-06	9.83864e-05
W74442	Fanconi anemia, complementation group I	FANCI	55215	213007_at	-1.92843	1.00984	-1.81378	2.14992	1.36772	8.27513	56.0137	1.32826e-06	9.83864e-05
BE567130	---	---		242873_at	-0.425193	-1.83063	-0.403671	-2.75575	3.14168	7.58194	56.0017	1.32952e-06	9.83864e-05
NM_015387	MOB1, Mps One Binder kinase activator-like 3 (yeast)	MOBKL3	25843	202919_at	-0.720276	0.717162	-1.12317	1.49645	0.232365	9.14818	55.9707	1.33278e-06	9.8494e-05
NM_171846	lactamase, beta	LACTB	114294	1552485_at	-1.27485	0.218625	-1.28598	0.0535339	2.02361	5.72699	55.9417	1.33582e-06	9.85853e-05
N90191	cyclin B1	CCNB1	891	228729_at	-2.6461	2.15906	-0.98937	2.25047	1.08568	8.4148	55.8945	1.34081e-06	9.882e-05
AI873304	---	---		241575_at	2.628	-2.02438	-1.47921	-2.17851	0.48527	5.81588	55.8322	1.34742e-06	9.91735e-05
NM_020375	chromosome 12 open reading frame 5	C12orf5	57103	219099_at	-2.37525	0.378729	-2.33257	2.02244	2.45576	7.52393	55.7911	1.35181e-06	9.92742e-05
AL512744	chromosome 1 open reading frame 124	C1orf124	83932	223511_at	-1.20592	-0.304677	-1.20798	0.750401	1.61253	5.79345	55.7853	1.35243e-06	9.92742e-05
AK021607	essential meiotic endonuclease 1 homolog 1 (S. pombe)	EME1	146956	234464_s_at	-1.68636	1.31788	-0.956362	1.52874	0.865478	7.66846	55.6958	1.36204e-06	9.95781e-05
NM_022893	B-cell CLL/lymphoma 11A (zinc finger protein)	BCL11A	53335	219497_s_at	-1.71831	0.372035	-0.920584	0.971235	1.56053	7.94295	55.6442	1.36762e-06	9.98528e-05
X83301	glucuronidase, beta pseudogene /// glucuronidase, beta pseudogene	SMA4 /// SMA5		215043_s_at	-0.908134	-0.534863	-1.30469	-0.893918	2.55216	5.35281	55.6126	1.37105e-06	9.98979e-05
AI927931	disabled homolog 1 (Drosophila) /// OMA1 homolog, zinc metallopeptidase (S. cerevisiae)	DAB1 /// OMA1		226020_s_at	-1.66337	0.814371	-0.834708	1.60939	0.875461	7.50239	55.5568	1.37713e-06	0.000100146
AI677701	RNA binding motif protein 24	RBM24	221662	235004_at	-1.92429	-0.633181	0.0947707	1.0794	1.35256	7.20969	55.5246	1.38066e-06	0.000100167
W65310	tumor necrosis factor receptor superfamily, member 10a	TNFRSF10A	8797	231775_at	-1.53434	-0.146995	-1.33263	1.09126	1.74426	7.08968	55.5036	1.38296e-06	0.000100167
AW007694	G2/M-phase specific E3 ubiquitin protein ligase	G2E3	55632	223256_at	-1.64612	0.945577	-1.59258	1.50146	1.39167	7.5512	55.4984	1.38354e-06	0.000100167
T62985	acyl-CoA oxidase 1, palmitoyl	ACOX1	51	213501_at	-0.556431	0.13008	-1.55222	0.401542	1.28019	6.11576	55.4872	1.38477e-06	0.000100167
AI277617	FYVE, RhoGEF and PH domain containing 4	FGD4	121512	230559_x_at	-1.79741	1.66861	-1.56295	2.2644	0.773578	4.89437	55.4406	1.3899e-06	0.000100406
AW665832	pseudouridylate synthase 7 homolog (S. cerevisiae)-like	PUS7L	83448	229751_s_at	-1.20654	0.675347	-1.07053	0.59352	1.29943	5.70538	55.4168	1.39254e-06	0.000100463
NM_015239	ATP/GTP binding protein 1	AGTPBP1	23287	204500_s_at	-1.80959	1.74088	-1.08658	1.74331	0.791473	8.10819	55.3955	1.39491e-06	0.000100501
AF212246	histone deacetylase 8	HDAC8	55869	223908_at	-1.29086	0.0888692	-1.21165	0.880372	1.48209	5.35874	55.2891	1.40679e-06	0.000101224
NM_018082	polymerase (RNA) III (DNA directed) polypeptide B	POLR3B	55703	219459_at	-1.23647	0.838865	-0.145648	0.289154	0.861178	8.12242	55.2437	1.41189e-06	0.000101325
NM_002851	protein tyrosine phosphatase, receptor-type, Z polypeptide 1	PTPRZ1	5803	204469_at	-3.38962	3.80966	-1.34255	4.01326	0.33926	7.58351	55.2436	1.4119e-06	0.000101325
NM_005504	branched chain amino-acid transaminase 1, cytosolic	BCAT1	586	214452_at	-1.25086	0.721822	-2.2733	2.63837	0.766876	5.82103	55.2034	1.41644e-06	0.000101517
NM_003981	protein regulator of cytokinesis 1	PRC1	9055	218009_s_at	-1.61982	0.996691	-1.15915	1.69644	0.929402	9.18676	55.1216	1.42572e-06	0.000102049
NM_005573	lamin B1	LMNB1	4001	203276_at	-2.76755	1.47278	-0.846897	0.831656	2.28678	7.76358	55.0563	1.43319e-06	0.000102315
BF435958	---	---		227431_at	-1.2473	1.03549	-1.25805	1.36072	0.833698	7.09085	55.0024	1.4394e-06	0.000102374
AA702016	methylenetetrahydrofolate dehydrogenase (NADP+ dependent) 2-like	MTHFD2L	441024	238762_at	-1.44203	-0.925883	-1.32328	-1.1101	3.37291	6.03801	54.8188	1.46078e-06	0.000103253
BF590861	chromosome 9 open reading frame 40	C9orf40	55071	222781_s_at	-1.39637	0.0237798	-0.851295	1.57156	0.908261	7.75081	54.8045	1.46246e-06	0.000103253
BC002923	protection of telomeres 1 homolog (S. pombe)	POT1	25913	204353_s_at	-1.01875	-0.271989	-1.90883	2.27412	0.865888	6.39945	54.7969	1.46335e-06	0.000103253
AK002152	staufen, RNA binding protein, homolog 2 (Drosophila)	STAU2	27067	227179_at	-0.201749	-0.32503	-0.010379	-1.63158	1.40473	6.91041	54.7633	1.46732e-06	0.000103282
NM_000026	adenylosuccinate lyase	ADSL	158	202144_s_at	-1.25652	0.837965	-0.522786	0.528885	0.973128	10.2259	54.5587	1.49172e-06	0.000104445
AW665865	phospholipase C, eta 1	PLCH1	23007	214745_at	-1.34197	0.132233	-1.35073	1.82871	0.97924	5.60246	54.4985	1.49899e-06	0.000104552
NM_001415	eukaryotic translation initiation factor 2, subunit 3 gamma, 52kDa	EIF2S3	1968	205321_at	-1.18602	-0.017969	-2.33814	1.31909	1.87138	7.84915	54.4161	1.50903e-06	0.000104594
BF965437	tubulin tyrosine ligase-like family, member 12	TTLL12	23170	216251_s_at	-0.81928	-0.143271	-0.709965	0.0306085	1.31994	8.16397	54.4129	1.50941e-06	0.000104594
AF052167	MRS2 magnesium homeostasis factor homolog (S. cerevisiae)	MRS2	57380	218536_at	-1.6332	2.98908	-1.35291	2.20722	0.0672982	7.72707	54.4091	1.50988e-06	0.000104594
D30658	glycyl-tRNA synthetase	GARS	2617	208693_s_at	-0.712106	0.268061	-1.31406	1.56383	0.456241	11.0083	54.4068	1.51016e-06	0.000104594
AA740875	glutathione S-transferase, C-terminal domain containing	GSTCD	79807	235387_at	-0.873693	0.0154535	-1.25624	0.295206	1.50923	6.61153	54.3837	1.51299e-06	0.000104594
BE222610	chromosome 5 open reading frame 44	C5orf44	80006	236526_x_at	-0.858037	-0.193256	-0.972612	-0.426052	1.8549	4.97046	54.2933	1.52412e-06	0.000104791
AF055024	ankyrin repeat and SOCS box-containing 1	ASB1	51665	212819_at	-0.621582	-0.408563	-1.21663	1.03548	0.878534	5.14368	54.2491	1.5296e-06	0.000104791
AI887749	---	---		243591_at	-0.972343	1.20853	-1.35629	1.37625	0.556188	6.04632	54.2362	1.5312e-06	0.000104791
BE964473	ribulose-5-phosphate-3-epimerase	RPE	6120	221770_at	-1.07388	0.444098	-1.50163	1.21764	1.11518	7.20101	54.2138	1.53399e-06	0.000104846
NM_006547	insulin-like growth factor 2 mRNA binding protein 3	IGF2BP3	10643	203820_s_at	-1.01942	1.85674	-1.62189	1.67814	0.363006	10.2465	54.1836	1.53776e-06	0.000104846
NM_005513	general transcription factor IIE, polypeptide 1, alpha 56kDa	GTF2E1	2960	205930_at	-1.75226	2.4842	-0.939596	1.17819	0.765131	7.88243	54.135	1.54386e-06	0.000105131
NM_003659	alkylglycerone phosphate synthase	AGPS	8540	205401_at	-0.607675	1.37751	-1.65301	0.420402	0.970242	6.3303	54.1068	1.5474e-06	0.000105139
NM_017512	enolase superfamily member 1	ENOSF1	55556	204143_s_at	-1.60607	-1.78031	-1.1375	1.02462	2.27476	7.42545	54.091	1.5494e-06	0.000105139
AF020589	cytochrome c oxidase subunit VIa polypeptide 1	COX6A1	1337	224344_at	3.09044	-4.44801	-0.814105	-4.60786	2.00687	9.2672	54.0882	1.54975e-06	0.000105139
BC032716	---	---		1554887_at	-1.39831	-0.607897	-1.54283	2.15556	1.19245	6.22304	54.0532	1.55417e-06	0.000105308
BC029332	---	---		1570107_at	3.36917	-3.51921	-0.622126	-3.4118	0.493181	8.26671	54.003	1.56055e-06	0.000105478
NM_005795	calcitonin receptor-like	CALCRL	10203	206331_at	-0.0332492	-1.35979	-0.593568	-1.75669	2.05335	6.47356	53.9824	1.56318e-06	0.000105525
AI458020	ribosomal protein L35a	RPL35A	6165	238026_at	-1.19627	-0.547772	-0.235776	0.553533	1.16702	7.28477	53.96	1.56603e-06	0.000105587
W80678	v-Ki-ras2 Kirsten rat sarcoma viral oncogene homolog	KRAS	3845	204009_s_at	-0.5337	1.1994	-1.78831	1.79971	0.126298	10.0886	53.831	1.58264e-06	0.000106444
BC001234	von Willebrand factor A domain containing 5A	VWA5A	4013	210102_at	-0.946799	0.082709	-1.47438	1.19436	1.10591	7.43409	53.7681	1.59081e-06	0.000106655
BC000147	malic enzyme 2, NAD(+)-dependent, mitochondrial	ME2	4200	209397_at	-1.56768	0.627742	-1.58156	0.316512	2.2018	9.41446	53.7565	1.59231e-06	0.000106655
NM_016101	nuclear import 7 homolog (S. cerevisiae)	NIP7	51388	219031_s_at	-1.18189	-0.120762	-1.41626	0.17023	2.05283	7.85413	53.6901	1.60101e-06	0.000106655
AA206016	feline leukemia virus subgroup C cellular receptor 1	FLVCR1	28982	228191_at	-1.81776	2.39129	-1.30134	2.02305	0.539522	8.98649	53.6696	1.60371e-06	0.000106655
NM_001316	CSE1 chromosome segregation 1-like (yeast)	CSE1L	1434	201112_s_at	-1.46802	1.04662	-1.4784	1.42212	1.15666	10.3806	53.6573	1.60533e-06	0.000106655
BE217875	syntaxin 6	STX6	10228	212799_at	-0.666274	0.778469	-1.41679	1.45546	0.381007	8.40394	53.6301	1.60891e-06	0.000106655
AK001672	Fanconi anemia, complementation group M	FANCM	57697	234733_s_at	-1.36656	1.05814	-1.2025	1.15794	1.04356	5.90606	53.6193	1.61035e-06	0.000106655
BF338332	unkempt homolog (Drosophila)-like	UNKL	64718	229908_s_at	-1.33179	1.11782	-0.757168	0.84768	0.898845	7.93477	53.6131	1.61116e-06	0.000106655
AF060511	bolA homolog 2 (E. coli) /// bolA homolog 2B (E. coli)	BOLA2 /// BOLA2B		209836_x_at	-1.06866	0.121821	-0.910173	0.703255	1.166	9.45056	53.581	1.61541e-06	0.000106807
AK024433	mitochondrial ribosomal protein S25	MRPS25	64432	224873_s_at	-1.73505	1.81558	-0.756517	0.717793	1.15567	5.92559	53.5118	1.62464e-06	0.000107158
AF131807	SERPINE1 mRNA binding protein 1	SERBP1	26135	217724_at	-0.97521	0.779696	-1.20119	1.00674	0.844943	11.808	53.4003	1.63962e-06	0.000108015
BC005883	missing oocyte, meiosis regulator, homolog (Drosophila)	MIOS	54468	211724_x_at	-1.13878	0.879777	-0.844919	1.55329	0.373268	8.02288	53.2501	1.66009e-06	0.000109232
NM_003193	tubulin folding cofactor E	TBCE	6905	203715_at	-1.62062	0.663517	-1.23431	2.16477	0.779146	6.62567	53.1949	1.66768e-06	0.000109399
BG260087	coxsackie virus and adenovirus receptor	CXADR	1525	226374_at	-0.547666	1.97118	-1.55265	1.6788	-0.193493	9.85567	53.1867	1.66882e-06	0.000109399
AV700885	BEN domain containing 3	BEND3	57673	227920_at	-1.27946	2.04624	-0.981426	1.3886	0.325932	6.99943	53.1817	1.66951e-06	0.000109399
AI609256	---	---		229500_at	-1.65741	1.28634	-1.46828	0.831834	1.65293	6.38216	53.1331	1.67624e-06	0.000109598
AW194766	cyclin-dependent kinase 6	CDK6	1021	243000_at	-1.01214	0.398272	-1.44248	2.20059	0.373981	6.10446	53.1082	1.67971e-06	0.000109598
BC042378	---	---		1556329_a_at	-1.14161	-0.547938	-1.47633	-1.8688	3.55434	5.23597	52.9614	1.70029e-06	0.000110724
NM_020300	microsomal glutathione S-transferase 1	MGST1	4257	231736_x_at	-1.30886	0.292268	-2.4971	2.02543	1.52589	10.9916	52.9185	1.70638e-06	0.000110724
AA631103	---	---		239847_at	-1.4054	0.0478998	-1.08396	1.95102	0.811392	5.48262	52.9029	1.70858e-06	0.000110724
AI911518	G patch domain containing 4	GPATCH4	54865	224634_at	-2.22012	1.21085	-0.808914	1.22398	1.5398	7.62872	52.8885	1.71063e-06	0.000110724
NM_016139	coiled-coil-helix-coiled-coil-helix domain containing 2	CHCHD2	51142	217720_at	-0.192189	-2.15822	-1.33211	1.0326	1.11127	11.7129	52.8706	1.71318e-06	0.000110724
AA398590	PARK2 co-regulated-like	PACRGL	133015	235260_s_at	-0.59444	-0.706057	-1.65053	0.825936	1.37952	6.93947	52.8232	1.71996e-06	0.0001109
AI823905	G2/M-phase specific E3 ubiquitin protein ligase	G2E3	55632	223257_at	-2.13993	1.53956	-2.31501	2.20009	1.70336	6.68473	52.786	1.72529e-06	0.000111035
AF288389	glycosyltransferase 25 domain containing 2	GLT25D2	23127	209883_at	-1.62116	-1.10113	-1.60397	-0.316047	3.26821	6.5653	52.7803	1.72613e-06	0.000111035
AW170015	phosphatidylinositol-specific phospholipase C, X domain containing 2	PLCXD2	257068	235230_at	-0.826192	0.725048	-1.31521	0.598148	1.06255	5.38996	52.7024	1.73737e-06	0.000111079
AI076810	dynein, axonemal, heavy chain 14	DNAH14	127602	242283_at	-2.07296	0.10741	-1.11091	2.78034	0.924208	6.7736	52.6666	1.74258e-06	0.000111079
AB046783	amyotrophic lateral sclerosis 2 (juvenile)	ALS2	57679	226291_at	-1.07743	0.445104	-0.892333	1.13784	0.765388	7.45729	52.6411	1.7463e-06	0.000111079
AF114488	intersectin 1 (SH3 domain protein)	ITSN1	6453	209297_at	-0.616455	0.922586	-1.22347	1.6348	0.0347125	8.69111	52.6345	1.74726e-06	0.000111079
NM_004504	ArfGAP with FG repeats 1	AGFG1	3267	218092_s_at	-0.398244	1.01261	-1.89901	0.795011	0.796706	8.28584	52.5797	1.75529e-06	0.000111079
BC000941	selenophosphate synthetase 1	SEPHS1	22929	208941_s_at	-1.59263	2.60459	-1.13749	1.32814	0.59733	8.09038	52.558	1.75849e-06	0.000111153
AW409794	ribosomal modification protein rimK-like family member B	RIMKLB	57494	225978_at	-1.32874	1.49912	-1.24958	0.908605	1.05635	6.36646	52.5063	1.76612e-06	0.000111205
N63953	zinc finger protein 566	ZNF566	84924	240239_at	-1.10848	-0.139665	-1.04332	1.16891	1.07131	4.7294	52.4671	1.77193e-06	0.000111205
AI652662	branched chain amino-acid transaminase 1, cytosolic	BCAT1	586	214390_s_at	-0.309154	-0.426513	-1.21482	1.68932	0.13499	6.50727	52.4613	1.77279e-06	0.000111205
NM_018094	G1 to S phase transition 2	GSPT2	23708	205541_s_at	-1.00558	0.839017	-1.31286	1.43479	0.64462	8.35801	52.4406	1.77587e-06	0.000111205
AI928203	protein kinase, AMP-activated, alpha 2 catalytic subunit	PRKAA2	5563	238441_at	-1.81901	-0.113658	-0.819123	1.49611	1.40557	5.98924	52.4328	1.77703e-06	0.000111205
NM_006429	chaperonin containing TCP1, subunit 7 (eta)	CCT7	10574	200812_at	-1.07078	0.791088	-1.45784	0.862188	1.20418	10.8084	52.4042	1.78129e-06	0.000111205
BE302191	serine/threonine kinase 38 like	STK38L	23012	212565_at	-1.5895	-0.801868	-1.61319	0.700678	2.46514	8.36618	52.4015	1.7817e-06	0.000111205
BU683892	Chromobox homolog 3 (HP1 gamma homolog, Drosophila)	CBX3	11335	1555920_at	-1.28044	-0.111932	-0.991669	1.83217	0.757421	6.90064	52.3236	1.79341e-06	0.000111808
BF439204	chromosome 12 open reading frame 29	C12orf29	91298	228378_at	-0.894571	-0.441776	-1.86647	1.1065	1.54847	6.79924	52.2389	1.80624e-06	0.000112351
NM_004749	transforming growth factor beta regulator 4	TBRG4	9238	220789_s_at	-0.97822	0.223918	-1.12395	1.72558	0.50249	8.09724	52.0864	1.82961e-06	0.000113417
D88357	cyclin-dependent kinase 1	CDK1	983	210559_s_at	-1.97525	0.30891	-2.24611	2.43767	1.74458	8.09226	52.0697	1.83219e-06	0.000113448
BE221922	apolipoprotein O-like	APOOL	139322	213289_at	-1.27275	-0.619266	-1.74092	1.62944	1.55349	6.53988	51.9792	1.84627e-06	0.000114119
AB063105	tRNA nucleotidyl transferase, CCA-adding, 1	TRNT1	51095	1552625_a_at	-0.898982	-0.565974	-1.42169	0.670038	1.58874	6.35073	51.9732	1.8472e-06	0.000114119
X64643	BRCA1/BRCA2-containing complex, subunit 3	BRCC3	79184	231913_s_at	-0.968092	-0.807527	-1.51462	-0.0528989	2.28228	5.57455	51.9428	1.85196e-06	0.000114284
BC001627	2-hydroxyacyl-CoA lyase 1	HACL1	26061	223211_at	-1.50324	0.763347	-1.04049	1.19617	1.145	7.54773	51.8633	1.86448e-06	0.000114927
BE501862	Rho GTPase activating protein 18	ARHGAP18	93663	225173_at	0.0768865	-0.907143	0.0389155	-2.18464	1.65598	7.37518	51.8191	1.87149e-06	0.000115228
AI269596	leucine-rich repeats and IQ motif containing 3	LRRIQ3	127255	235498_at	-1.12428	-0.900558	-0.796054	1.31062	1.08142	4.80302	51.5865	1.90888e-06	0.000116723
AA102581	ubiquitin specific peptidase 31	USP31	57478	226035_at	-1.40349	1.13084	-0.714826	1.35105	0.602396	8.13436	51.5751	1.91073e-06	0.000116723
BG532690	integrin, alpha 4 (antigen CD49D, alpha 4 subunit of VLA-4 receptor)	ITGA4	3676	213416_at	-1.01994	-1.30574	-0.946027	-0.905289	2.6894	6.34976	51.47	1.92795e-06	0.000117512
NM_018087	transmembrane protein 48	TMEM48	55706	218073_s_at	-1.19262	0.0819132	-1.75377	1.28335	1.47893	6.46857	51.3981	1.93982e-06	0.000117708
BC000436	endosulfine alpha	ENSA	2029	202596_at	-1.09802	1.14649	-0.40149	0.421009	0.702839	9.54757	51.3831	1.94232e-06	0.000117708
AF251059	serine/threonine/tyrosine kinase 1	STYK1	55359	221696_s_at	-0.882367	-0.529285	-1.05395	-0.251128	1.92885	5.97793	51.3805	1.94275e-06	0.000117708
AL049923	oxysterol binding protein-like 8	OSBPL8	114882	212582_at	-1.17354	0.935958	-1.27916	0.407913	1.44239	9.72617	51.3587	1.94637e-06	0.000117708
AV702487	methylmalonic aciduria (cobalamin deficiency) cblB type	MMAB	326625	225826_at	-0.636926	-1.351	-1.07671	0.771479	1.29075	7.42258	51.3465	1.9484e-06	0.000117708
AI692878	MOB1, Mps One Binder kinase activator-like 2B (yeast)	MOBKL2B	79817	229568_at	-1.46299	0.572876	-0.817816	1.86373	0.574753	6.2304	51.3115	1.95425e-06	0.000117919
NM_016940	RWD domain containing 2B	RWDD2B	10069	218377_s_at	0.20602	-2.04284	-0.185399	-0.63606	1.02257	7.44637	51.2998	1.95621e-06	0.000117919
NM_022470	zinc finger, matrin-type 3	ZMAT3	64393	219628_at	-0.909273	-1.50117	-1.70021	-0.0426712	2.57159	7.56827	51.2841	1.95884e-06	0.000117947
NM_007054	kinesin family member 3A	KIF3A	11127	213623_at	-0.630684	0.47281	-1.57001	-0.00997682	1.52641	6.42561	51.2135	1.97074e-06	0.000118256
BE503800	DEAD (Asp-Glu-Ala-Asp) box polypeptide 31	DDX31	64794	235436_at	-1.83747	0.856353	-0.833996	1.08848	1.38236	6.0769	51.2069	1.97187e-06	0.000118256
BE543064	mannosidase, alpha, class 1A, member 2	MAN1A2	10905	217921_at	-1.11624	-0.54239	-1.37921	-0.481975	2.53783	5.15425	51.2024	1.97262e-06	0.000118256
AK023446	aminoadipate-semialdehyde synthase	AASS	10157	214829_at	-2.61541	3.52777	-0.581673	1.26193	0.98598	7.30258	51.1285	1.98519e-06	0.000118618
AB032931	ubiquitin-conjugating enzyme E2T (putative)	UBE2T	29089	223229_at	-2.22591	0.270083	-1.41031	2.34751	1.51108	8.23764	51.1049	1.98923e-06	0.000118645
AF326731	NUF2, NDC80 kinetochore complex component, homolog (S. cerevisiae)	NUF2	83540	223381_at	-2.68907	1.76083	-2.34588	3.04543	1.63576	7.49652	51.0625	1.99649e-06	0.000118645
AI366784	TAF4b RNA polymerase II, TATA box binding protein (TBP)-associated factor, 105kDa	TAF4B	6875	235020_at	-2.02235	1.52445	-0.654393	0.613595	1.5414	6.92516	51.0606	1.99681e-06	0.000118645
NM_004411	dynein, cytoplasmic 1, intermediate chain 1	DYNC1I1	1780	205348_s_at	-1.5637	-1.14531	-1.25162	-0.473042	3.09525	7.20233	51.0313	2.00186e-06	0.000118645
N64686	chromosome 1 open reading frame 96	C1orf96	126731	225904_at	-1.59914	2.4	-1.5385	2.22985	0.338244	7.75029	51.0246	2.00302e-06	0.000118645
AK095151	Ubiquitin protein ligase E3 component n-recognin 5	UBR5	51366	1555888_at	-1.07822	1.30641	-1.45762	0.14529	1.51764	5.67943	50.997	2.00779e-06	0.000118799
NM_031209	queuine tRNA-ribosyltransferase 1	QTRT1	81890	221270_s_at	-0.575077	-0.284204	-0.827927	0.209814	1.08189	7.69971	50.9359	2.01838e-06	0.000119207
BE966018	ring finger protein, LIM domain interacting	RLIM	51132	222815_at	-0.807	-2.36299	-0.880904	1.71212	1.04052	5.97092	50.8798	2.02818e-06	0.000119359
NM_003321	Tu translation elongation factor, mitochondrial	TUFM	7284	201113_at	-1.14959	0.101077	-1.3235	0.874182	1.41544	10.1645	50.8545	2.03261e-06	0.00011938
AK000490	DEP domain containing 1	DEPDC1	55635	222958_s_at	-2.29541	0.710169	-1.37377	2.40481	1.37133	7.63261	50.8093	2.04058e-06	0.000119702
AI709389	synaptojanin 2 binding protein	SYNJ2BP	55333	227274_at	-0.895187	0.92202	-0.566119	-0.0861508	1.02269	9.25108	50.7958	2.04296e-06	0.000119712
AA922068	cyclin-dependent kinase 6	CDK6	1021	224848_at	-1.0087	-1.36987	-0.369302	-0.650842	2.14542	8.2253	50.7662	2.0482e-06	0.000119891
AA628539	eukaryotic translation initiation factor 3, subunit B	EIF3B	8662	242550_at	-2.04254	2.50631	-1.10792	1.95003	0.645702	6.88226	50.7518	2.05075e-06	0.000119912
NM_001446	fatty acid binding protein 7, brain	FABP7	2173	205030_at	-1.50409	2.12116	-1.41511	-0.498485	2.07277	6.98266	50.7013	2.05974e-06	0.000120308
BG170762	ubiquitin-conjugating enzyme E2G 1 (UBC7 homolog, yeast)	UBE2G1	7326	226005_at	-1.24702	2.29699	-1.00696	0.844058	0.589956	8.39829	50.6405	2.07063e-06	0.000120651
AI093579	integrin, alpha V (vitronectin receptor, alpha polypeptide, antigen CD51)	ITGAV	3685	202351_at	0.235965	-0.637064	-1.43268	-0.430431	1.21846	10.491	50.6287	2.07276e-06	0.000120651
AA894574	FK506 binding protein 4, 59kDa	FKBP4	2288	200894_s_at	-1.36152	-0.0458811	-2.35571	2.63691	1.18935	7.75609	50.5704	2.08327e-06	0.000120651
AI583537	mannose-6-phosphate receptor (cation dependent)	M6PR	4074	200900_s_at	-1.03363	-0.0697087	-1.7586	2.3647	0.652798	8.07958	50.5286	2.09085e-06	0.000120708
AB028968	KIAA1045	KIAA1045	23349	37566_at	-1.00627	-1.31664	-0.85302	-0.810878	2.55441	5.17115	50.4374	2.10751e-06	0.000121283
AA630626	glutamate-cysteine ligase, modifier subunit	GCLM	2730	234986_at	-1.61389	0.159179	-1.69014	1.18391	1.89831	5.94698	50.3814	2.11782e-06	0.000121748
AW137669	heterogeneous nuclear ribonucleoprotein U (scaffold attachment factor A)	HNRNPU	3192	225805_at	-1.34899	0.664085	-1.86144	1.86614	1.12449	6.88129	50.2615	2.14009e-06	0.000122256
BC000973	G2/M-phase specific E3 ubiquitin protein ligase	G2E3	55632	223258_s_at	-1.56487	0.232452	-1.38653	1.44019	1.45161	7.01286	50.1768	2.15601e-06	0.00012267
NM_001826	CDC28 protein kinase regulatory subunit 1B	CKS1B	1163	201897_s_at	-1.56806	0.832791	-1.55715	2.6686	0.549491	10.198	50.1091	2.16883e-06	0.000122867
AF151861	androgen-induced 1	AIG1	51390	223136_at	-1.12972	1.11375	-0.244075	-0.835001	1.47785	7.34705	50.1045	2.1697e-06	0.000122867
BC000196	cyclin G1	CCNG1	900	208796_s_at	-0.930647	1.24631	-1.25651	0.759892	0.846289	11.1604	50.1009	2.17038e-06	0.000122867
AU155565	choroideremia-like (Rab escort protein 2)	CHML	1122	226350_at	-2.36192	2.07287	-0.785836	0.678072	1.7428	9.09227	50.0974	2.17104e-06	0.000122867
NM_002936	ribonuclease H1	RNASEH1	246243	218497_s_at	-0.96335	1.2179	-0.994529	0.70826	0.748231	8.38139	50.0377	2.18243e-06	0.000123002
U19599	BCL2-associated X protein	BAX	581	211833_s_at	-1.51849	-0.0648097	-2.07086	0.458386	2.61508	7.90762	49.961	2.19719e-06	0.000123408
NM_007086	WD repeat and HMG-box DNA binding protein 1	WDHD1	11169	204728_s_at	-1.57197	2.55231	-1.23518	2.1713	0.0971208	6.11493	49.9534	2.19866e-06	0.000123408
BC028974	zinc finger protein 57	ZNF57	126295	1554628_at	-0.929365	1.03728	-0.993831	1.57135	0.198595	6.24035	49.8973	2.20953e-06	0.00012389
AI347000	---	---		229803_s_at	-0.9816	-0.133571	-0.772008	-0.0803153	1.59434	7.34416	49.8697	2.21491e-06	0.000123979
AL556409	galanin prepropeptide	GAL	51083	214240_at	-2.55449	2.34459	-2.24634	2.76593	1.42656	7.82886	49.8647	2.21588e-06	0.000123979
AK024960	spermatid perinuclear RNA binding protein	STRBP	55342	233252_s_at	-1.27636	1.46365	-1.10686	2.03484	0.169829	8.15299	49.8359	2.22152e-06	0.000123979
BF064224	DNA fragmentation factor, 45kDa, alpha polypeptide	DFFA	1676	226116_at	-1.1637	1.57324	-1.064	0.778536	0.829592	9.0909	49.831	2.22247e-06	0.000123979
BG500396	transmembrane protein 33	TMEM33	55161	225492_at	-1.06029	0.808432	-1.25707	0.538575	1.26981	9.23265	49.7191	2.24451e-06	0.000124826
U15555	serine palmitoyltransferase, long chain base subunit 2	SPTLC2	9517	216202_s_at	0.332691	0.280282	-2.0073	-0.230352	1.06565	6.25724	49.7024	2.24782e-06	0.000124883
J03263	lysosomal-associated membrane protein 1	LAMP1	3916	201551_s_at	-0.629993	-0.921817	-1.6884	-0.0324494	2.0845	6.02081	49.6866	2.25097e-06	0.000124931
AK094587	RNA pseudouridylate synthase domain containing 3	RPUSD3	285367	1566603_s_at	-1.10279	-1.57077	-1.56887	1.42959	1.71923	5.1653	49.5974	2.26877e-06	0.000125791
NM_016142	hydroxysteroid (17-beta) dehydrogenase 12	HSD17B12	51144	217869_at	-0.955044	0.434129	-0.86449	0.823339	0.837769	10.6588	49.529	2.28257e-06	0.0001263
AI671049	cyclin E1	CCNE1	898	213523_at	-1.25458	1.35959	-0.646202	1.15687	0.460941	8.46798	49.5046	2.28751e-06	0.000126445
AW269686	RAP2B, member of RAS oncogene family	RAP2B	5912	238622_at	-1.0619	-0.0126696	-1.13195	0.267455	1.64246	6.12369	49.475	2.29352e-06	0.000126615
BF669455	CD164 molecule, sialomucin	CD164	8763	208654_s_at	0.506338	-0.333718	-2.03642	-0.230075	1.1159	8.72999	49.451	2.2984e-06	0.000126615
NM_015986	cytokine receptor-like factor 3	CRLF3	51379	205474_at	-1.49761	0.982158	-1.50062	1.24508	1.34059	8.40944	49.3781	2.31334e-06	0.000127101
BE464161	yrdC domain containing (E. coli)	YRDC	79693	222703_s_at	-0.547724	-1.4646	-1.53902	1.20106	1.26123	7.50168	49.3252	2.32424e-06	0.000127342
NM_024772	zinc finger, MYM-type 1	ZMYM1	79830	220206_at	-1.46342	1.04424	-0.991707	1.87281	0.527934	6.62715	49.3116	2.32706e-06	0.000127342

## Sheet: 7.UpPGCvs.ECC
Representative Public ID	Gene Title	Gene Symbol	Entrez Gene	ID	EGCvsREF	ESCvsREF	PGCvsREF	ECCvsREF	IPSCvsREF	AveExpr	F	P.Value	adj.P.Val
T50399	hemoglobin, alpha 1 /// hemoglobin, alpha 2	HBA1 /// HBA2		214414_x_at	-1.34679	-0.684915	7.62771	-2.16546	-2.0664	6.24497	456.006	1.01976e-10	1.94578e-06
U55764	sulfotransferase family 1E, estrogen-preferring, member 1	SULT1E1	6783	222940_at	-1.05115	-1.01709	5.02811	-1.27024	-1.11507	4.40813	303.127	6.58606e-10	3.59684e-06
V00489	hemoglobin, alpha 1 /// hemoglobin, alpha 2	HBA1 /// HBA2		217414_x_at	-0.803625	-1.02472	5.66016	-1.59391	-1.56563	7.29711	257.319	1.38994e-09	4.63466e-06
NM_004369	collagen, type VI, alpha 3	COL6A3	1293	201438_at	3.96864	0.550495	2.24741	-2.04126	-4.28957	9.08593	242.341	1.82645e-09	4.63466e-06
BF569051	H19, imprinted maternally expressed transcript (non-protein coding)	H19	283120	224646_x_at	3.83582	-3.19505	4.24916	-2.67812	-3.81817	9.03851	228.351	2.39416e-09	4.63466e-06
NM_002667	phospholamban	PLN	5350	204939_s_at	-0.845654	-0.907109	5.29029	-1.37363	-1.46309	5.81263	226.972	2.46105e-09	4.63466e-06
NM_002667	phospholamban	PLN	5350	204940_at	-0.779444	-0.893217	3.97364	-0.918782	-0.959389	4.20244	222.832	2.67605e-09	4.71442e-06
AL575306	H19, imprinted maternally expressed transcript (non-protein coding)	H19	283120	224997_x_at	3.95932	-2.46561	3.15622	-2.88762	-3.31652	7.61159	197.828	4.59722e-09	6.12362e-06
AW438674	melanoma antigen family A, 4	MAGEA4	4103	214254_at	-0.530457	5.60099	0.127414	-0.901331	-0.820593	4.44788	191.321	5.35152e-09	6.79681e-06
BC005931	hemoglobin, alpha 1 /// hemoglobin, alpha 2	HBA1 /// HBA2		211745_x_at	-0.636277	-1.45117	5.65158	-1.75317	-1.47894	7.17636	186.571	5.99858e-09	7.28002e-06
N32798	zinc finger protein 42 homolog (mouse)	ZFP42	132625	243161_x_at	-0.817953	5.43699	0.899119	-0.776172	-1.07634	4.7583	177.308	7.55836e-09	8.20899e-06
NM_000558	hemoglobin, alpha 1 /// hemoglobin, alpha 2	HBA1 /// HBA2		204018_x_at	-0.544432	-1.19089	4.95442	-1.54024	-1.33472	7.35638	176.09	7.79847e-09	8.20899e-06
AL037401	nuclear receptor subfamily 2, group F, member 2	NR2F2	7026	209120_at	1.96492	-3.86153	2.27332	-4.89234	1.06827	8.8379	173.262	8.39281e-09	8.20899e-06
AF105974	hemoglobin, alpha 1 /// hemoglobin, alpha 2	HBA1 /// HBA2		209458_x_at	-0.64426	-1.30337	5.61979	-1.64987	-1.5679	7.42222	173.15	8.41747e-09	8.20899e-06
D00943	myosin, heavy chain 6, cardiac muscle, alpha	MYH6	4624	214468_at	-1.38289	-1.25002	3.44539	1.62395	-1.57999	6.70787	169.706	9.22033e-09	8.3618e-06
AW025579	bicaudal C homolog 1 (Drosophila)	BICC1	80114	213429_at	1.31614	-2.90803	-0.915772	-2.53734	1.95528	7.16207	163.515	1.09122e-08	9.0991e-06
AF349114	hemoglobin, beta	HBB	3043	211696_x_at	-0.369083	-0.593281	3.07031	-1.03749	-0.788368	6.7846	139.966	2.20617e-08	1.29597e-05
AA788711	collagen, type I, alpha 2	COL1A2	1278	202403_s_at	2.53331	-0.329125	1.52473	-4.35204	-0.538718	11.2965	139.398	2.24713e-08	1.29597e-05
AB033025	KIAA1199	KIAA1199	57214	212942_s_at	2.75203	0.0442433	0.246758	-1.75703	-1.75994	5.86303	138.884	2.28494e-08	1.29597e-05
NM_001008	ribosomal protein S4, Y-linked 1	RPS4Y1	6192	201909_at	1.51257	1.70994	-1.07068	-5.83475	2.52106	10.5364	134.467	2.64431e-08	1.38829e-05
M25079	hemoglobin, beta	HBB	3043	209116_x_at	-0.439412	-1.17801	4.01856	-1.18419	-1.05749	5.97071	130.02	3.07817e-08	1.49485e-05
NM_002526	5'-nucleotidase, ecto (CD73)	NT5E	4907	203939_at	2.04315	-0.353553	0.573557	-1.3446	-1.41126	5.06611	129.54	3.12997e-08	1.49945e-05
AB015228	aldehyde dehydrogenase 1 family, member A2	ALDH1A2	8854	207016_s_at	0.0217393	-1.21904	3.7306	-1.34005	-1.20909	6.31166	126.797	3.44744e-08	1.57084e-05
N90870	---	---		232113_at	2.40937	-2.2137	2.8862	-3.75536	-1.09203	7.7366	125.749	3.57912e-08	1.58916e-05
BE220330	chromosome 7 open reading frame 46	C7orf46	340277	228600_x_at	-0.836508	1.54396	-0.304056	-2.4474	2.15616	5.8362	121.241	4.21991e-08	1.7328e-05
NM_016205	platelet derived growth factor C	PDGFC	56034	218718_at	0.0871613	-2.24862	-0.49537	-1.65643	2.09691	9.47638	120.611	4.32025e-08	1.73487e-05
NM_000851	glutathione S-transferase mu 5	GSTM5	2949	205752_s_at	0.69193	0.0516205	2.10021	-1.36651	-1.19827	6.81273	118.67	4.64809e-08	1.78765e-05
AA528017	angiogenic factor with G patch and FHA domains 1	AGGF1	55109	222661_at	0.391471	1.0974	0.13992	-2.97319	1.13157	7.43855	117.557	4.84969e-08	1.8266e-05
AI969945	Phospholamban	PLN	5350	228202_at	-0.646529	-0.932433	4.16719	-1.11519	-1.07732	4.30727	116.862	4.98112e-08	1.84097e-05
NM_000358	transforming growth factor, beta-induced, 68kDa	TGFBI	7045	201506_at	2.07186	-3.41799	0.147807	-2.96562	0.946012	10.9767	115.067	5.34089e-08	1.86967e-05
BG285011	AT rich interactive domain 5B (MRF1-like)	ARID5B	84159	212614_at	1.38232	-2.43122	-0.223564	-2.65693	1.34841	8.51733	113.466	5.68882e-08	1.90603e-05
NM_000559	hemoglobin, gamma A /// hemoglobin, gamma G	HBG1 /// HBG2		204848_x_at	-0.832387	-1.97677	5.89615	-1.69021	-1.31265	7.46197	113.141	5.76277e-08	1.91598e-05
NM_000633	B-cell CLL/lymphoma 2	BCL2	596	203685_at	-0.981839	-1.62887	2.93942	-1.07478	0.281708	5.92003	111.413	6.17639e-08	1.9836e-05
NM_000258	myosin, light chain 3, alkali; ventricular, skeletal, slow	MYL3	4634	205589_at	-0.00999055	-0.618211	3.28061	-1.12927	-1.21817	7.05514	110.176	6.49484e-08	2.02965e-05
NM_000184	hemoglobin, gamma A /// hemoglobin, gamma G	HBG1 /// HBG2		204419_x_at	-1.03662	-1.83904	6.3165	-1.62994	-1.47474	7.30417	109.009	6.81362e-08	2.0334e-05
NM_001423	epithelial membrane protein 1	EMP1	2012	201324_at	2.18038	-2.32751	0.193545	-4.2812	1.32056	8.41625	107.39	7.28831e-08	2.11721e-05
AW129056	hypothetical LOC57235	KIAA0485	57235	214295_at	-0.532676	-0.457154	2.39141	0.347217	-1.14069	4.76991	106.619	7.52838e-08	2.14139e-05
M14087	---	---		216405_at	3.16624	-5.06732	-0.671465	-5.80243	2.83879	10.3276	105.888	7.7649e-08	2.1478e-05
NM_016599	myozenin 2	MYOZ2	51778	207148_x_at	-0.240741	-0.733202	3.77057	-1.13746	-1.27026	4.98158	105.469	7.90459e-08	2.1478e-05
BF057809	---	---		237911_at	-1.19913	6.85939	1.8199	-1.11494	-1.5573	5.16607	105.426	7.91908e-08	2.1478e-05
AF349571	hemoglobin, alpha 1 /// hemoglobin, alpha 2	HBA1 /// HBA2		211699_x_at	-0.501883	-1.23593	4.83279	-1.45784	-1.33611	7.39814	105.397	7.92908e-08	2.1478e-05
AI133353	hemoglobin, gamma A /// hemoglobin, gamma G	HBG1 /// HBG2		213515_x_at	-1.17183	-1.61096	7.76371	-2.2356	-1.97658	6.57007	102.954	8.81067e-08	2.30404e-05
AU148057	dickkopf homolog 3 (Xenopus laevis)	DKK3	27122	214247_s_at	1.38504	0.90304	1.60305	0.371044	-3.00212	8.71765	102.827	8.85958e-08	2.30404e-05
AF020769	troponin C type 1 (slow)	TNNC1	7134	209904_at	-0.608703	-0.601388	2.66239	-0.195612	-0.835351	5.7477	102.158	9.12354e-08	2.31751e-05
NM_004503	homeobox C6	HOXC6	3223	206858_s_at	1.93843	-3.61367	1.24386	-4.66456	1.54659	8.5503	100.101	9.99662e-08	2.45372e-05
AI650353	dachshund homolog 1 (Drosophila)	DACH1	1602	228915_at	-1.23415	-1.89513	2.0491	-2.4422	2.12792	6.428	99.1025	1.04569e-07	2.52691e-05
BF342661	microtubule-associated protein 2	MAP2	4133	225540_at	-0.680975	-2.34956	0.872392	-2.16715	2.32733	7.23257	97.5123	1.12446e-07	2.64699e-05
BF593263	Na+/K+ transporting ATPase interacting 4	NKAIN4	128414	228017_s_at	-0.596835	0.252368	2.64962	0.591491	-1.64803	6.19817	93.4492	1.36106e-07	2.90358e-05
NM_014624	S100 calcium binding protein A6	S100A6	6277	217728_at	2.38396	-2.14947	-0.524653	-4.77904	1.86832	10.2364	92.9459	1.39442e-07	2.95979e-05
BF939176	myozenin 2	MYOZ2	51778	213782_s_at	-0.223681	-1.02484	4.42604	-1.50834	-1.37984	5.09397	92.8672	1.39973e-07	2.95979e-05
AF010316	prostaglandin E synthase	PTGES	9536	210367_s_at	2.76568	-0.795064	0.18375	-0.976877	-1.97191	7.76764	87.6351	1.81504e-07	3.53734e-05
AW296451	---	---		241681_at	0.0355729	0.84504	1.83201	0.159985	-1.64525	6.21799	86.5048	1.92363e-07	3.67326e-05
X02761	fibronectin 1	FN1	2335	212464_s_at	2.339	1.30382	0.828485	-0.59792	-2.92731	10.9783	85.2606	2.05247e-07	3.78688e-05
N30339	collagen, type V, alpha 1	COL5A1	1289	212488_at	2.68957	0.234588	0.836907	-0.786297	-2.80151	8.21026	83.0601	2.3071e-07	4.09633e-05
AF147445	---	---		1556824_at	2.40401	-3.06718	-0.228404	-3.44994	1.07061	8.70946	82.0657	2.43471e-07	4.27416e-05
BF223193	X (inactive)-specific transcript (non-protein coding)	XIST	7503	224589_at	-0.280352	-0.538702	2.24186	-0.676804	-0.583454	3.86269	82.0124	2.4418e-07	4.27416e-05
AI628360	natriuretic peptide receptor C/guanylate cyclase C (atrionatriuretic peptide receptor C)	NPR3	4883	219789_at	2.23796	-0.932032	0.765248	-1.49467	-1.441	5.30186	81.3981	2.52523e-07	4.39204e-05
X79857	troponin T type 2 (cardiac)	TNNT2	7139	215389_s_at	-0.445333	-0.855166	3.5428	-0.309076	-1.42543	7.00816	79.441	2.81522e-07	4.7307e-05
NM_025057	chromosome 14 open reading frame 45	C14orf45	80127	220173_at	0.333578	-0.449707	1.83657	-1.45424	-0.438563	5.49481	79.3087	2.83625e-07	4.73539e-05
NM_000366	tropomyosin 1 (alpha)	TPM1	7168	206117_at	-1.6577	1.71243	2.98839	0.215689	-1.04916	8.44208	78.7846	2.92145e-07	4.76267e-05
AA903473	integrin, alpha 8	ITGA8	8516	235666_at	2.05876	-1.39415	1.50672	-1.7902	-1.40506	6.05699	78.4766	2.97299e-07	4.78949e-05
AW007532	insulin-like growth factor binding protein 5	IGFBP5	3488	211959_at	3.33239	-3.64936	2.07397	-2.77318	-1.6498	9.40406	77.1249	3.21267e-07	4.97036e-05
AL046979	tensin 1	TNS1	7145	221748_s_at	2.00483	0.2147	2.60016	-1.2031	-3.00777	7.664	76.5239	3.32675e-07	5.04677e-05
AI694059	teashirt zinc finger homeobox 2	TSHZ2	128553	235616_at	1.39385	-1.1009	2.38208	-1.91978	-1.33509	5.8485	76.2085	3.3886e-07	5.09812e-05
BC009278	hypothetical protein LOC645722	LOC645722	645722	1555216_a_at	1.13504	-1.22568	1.95822	-1.43767	-1.07352	5.92128	75.8602	3.45855e-07	5.14664e-05
NM_000257	myosin, heavy chain 6, cardiac muscle, alpha /// myosin, heavy chain 7, cardiac muscle, beta	MYH6 /// MYH7		204737_s_at	-0.930717	-1.45664	4.52058	0.302122	-1.79887	5.98444	75.2176	3.59224e-07	5.28795e-05
BG290193	zinc finger protein 703	ZNF703	80139	222760_at	0.16561	-0.86336	2.34019	-0.269666	-1.25817	6.7371	74.4857	3.75225e-07	5.4685e-05
AI365263	developmental pluripotency associated 5	DPPA5	340168	241550_at	-0.494231	5.75727	1.05627	-1.40181	-1.1945	5.01247	72.9439	4.11875e-07	5.62343e-05
BF680255	Ribosomal protein S11	RPS11	6205	213350_at	0.720514	0.545156	1.19858	-1.35748	-0.796299	8.89246	72.6094	4.20392e-07	5.69699e-05
BE464483	lipase maturation factor 1	LMF1	64788	227984_at	0.191102	-1.07446	1.98131	0.0177856	-1.16568	5.13337	71.5571	4.48623e-07	5.76028e-05
BC002416	biglycan	BGN	633	201261_x_at	2.29536	-1.53138	1.68856	-1.88373	-1.65479	7.03863	70.1311	4.90658e-07	5.99078e-05
N74607	aquaporin 3 (Gill blood group)	AQP3	360	39248_at	2.12889	0.432008	1.1017	-1.01152	-2.33301	7.68356	69.9824	4.95313e-07	6.01123e-05
NM_000231	sarcoglycan, gamma (35kDa dystrophin-associated glycoprotein)	SGCG	6445	207302_at	-0.173283	-0.565969	2.54643	-0.505017	-0.999001	5.61107	69.1039	5.23935e-07	6.21426e-05
AI743156	kelch-like 31 (Drosophila)	KLHL31	401265	239398_at	-0.358463	-0.120635	2.89854	-0.914698	-0.923885	4.48506	69.1036	5.23945e-07	6.21426e-05
AI184988	fibrillin 3	FBN3	84467	240117_at	-0.521919	0.891106	1.89815	0.161723	-1.14837	6.83477	67.4996	5.81585e-07	6.53541e-05
NM_020149	Meis homeobox 2	MEIS2	4212	207480_s_at	1.11664	-3.50354	0.424418	-2.30425	1.30443	9.37751	66.4009	6.25558e-07	6.79293e-05
NM_001657	amphiregulin	AREG	374	205239_at	3.81206	0.0859685	-0.336163	-2.39005	-2.02324	6.70636	65.7224	6.5474e-07	6.97024e-05
NM_001771	CD22 molecule	CD22	933	204581_at	0.0736203	-0.45239	1.80597	-0.756295	-0.622604	5.30221	65.2201	6.77415e-07	7.10089e-05
BE439987	growth arrest-specific 7	GAS7	8522	202191_s_at	0.320669	1.04388	1.29625	0.103066	-1.60151	6.66241	65.0042	6.87457e-07	7.11062e-05
NM_017897	3-oxoacyl-ACP synthase, mitochondrial	OXSM	54995	219133_at	-0.205243	-0.326814	-0.223234	-1.23659	1.2874	7.41896	64.7534	6.99348e-07	7.20631e-05
NM_015853	UBX domain protein 1	UBXN1	51035	201871_s_at	0.522113	0.767793	0.0706933	-2.81308	1.05022	8.6707	64.5234	7.10477e-07	7.25258e-05
NM_003970	myomesin (M-protein) 2, 165kDa	MYOM2	9172	205826_at	-0.236349	-0.531355	2.17291	-0.945845	-0.404579	5.86538	64.4155	7.15767e-07	7.25831e-05
AA603041	hypothetical LOC150381	LOC150381	150381	238058_at	-0.901105	-1.65161	-0.213818	-2.20783	3.06607	6.43164	64.0652	7.33291e-07	7.29457e-05
AB051550	contactin associated protein-like 4	CNTNAP4	85445	232388_at	0.515793	-0.64841	1.96145	-1.63703	-0.515939	6.95583	63.897	7.41888e-07	7.36668e-05
AF349444	EP300 interacting inhibitor of differentiation 1	EID1	23741	211698_at	0.824718	1.31938	1.02794	-5.60966	1.78997	8.55304	63.214	7.7809e-07	7.58941e-05
AF020768	myosin, light chain 2, regulatory, cardiac, slow	MYL2	4633	209742_s_at	-0.187827	-1.01098	3.41085	-1.0677	-1.03728	5.85769	62.7465	8.0411e-07	7.68634e-05
NM_021951	doublesex and mab-3 related transcription factor 1	DMRT1	1761	220493_at	-0.210961	-0.93514	1.7649	0.373033	-0.902615	4.52632	61.7369	8.64021e-07	7.90398e-05
AL137578	EMX2 opposite strand (non-protein coding)	EMX2OS	196047	232531_at	0.464352	-1.27782	3.59385	-1.49473	-1.43783	6.03036	61.1183	9.03417e-07	8.13259e-05
AI671186	peptidase domain containing associated with muscle regeneration 1	PAMR1	25891	213661_at	2.20755	0.813221	0.64777	-1.01189	-2.23588	7.42921	60.6963	9.31553e-07	8.26977e-05
BE644917	X (inactive)-specific transcript (non-protein coding)	XIST	7503	224590_at	-0.424187	-0.587075	2.66741	-0.757449	-0.65343	3.80717	60.3732	9.53818e-07	8.40175e-05
AA045184	S100 calcium binding protein A16	S100A16	140576	227998_at	1.83235	-0.397154	0.415282	-0.632295	-1.55529	9.4426	59.7484	9.98735e-07	8.5262e-05
NM_003319	titin	TTN	7273	208195_at	-0.933515	0.560344	4.77542	-0.363244	-2.19472	7.22632	59.2751	1.03449e-06	8.63864e-05
AF130095	fibronectin 1	FN1	2335	210495_x_at	2.18546	1.07253	0.852418	-0.685397	-2.65432	11.3413	59.1671	1.04287e-06	8.6953e-05
AB051497	zinc finger protein 436	ZNF436	80818	226113_at	0.572143	-1.52617	1.41611	-2.61862	0.738253	7.14634	59.0534	1.05178e-06	8.74286e-05
AI830331	lysine (K)-specific demethylase 6B	KDM6B	23135	1556066_at	1.25102	-1.11085	0.357605	-0.960174	-0.479025	6.77069	58.7718	1.07424e-06	8.84875e-05
AW262311	---	---		231628_s_at	0.438944	-1.30602	1.78273	-4.86519	2.05136	8.50633	58.151	1.12585e-06	8.94789e-05
AA679589	exportin 7	XPO7	23039	240168_at	-0.560323	1.77975	1.38924	0.0582415	-0.997915	4.65791	57.9357	1.14445e-06	9.04516e-05
AI480314	SRY (sex determining region Y)-box 6	SOX6	55553	227498_at	-0.650435	-1.71884	1.20074	-2.01119	1.76368	5.82362	57.4327	1.18939e-06	9.31943e-05
NM_005330	hemoglobin, epsilon 1	HBE1	3046	205919_at	-0.779626	-0.30468	4.73398	-1.4781	-1.2894	6.04755	57.0284	1.22708e-06	9.51816e-05
D43968	runt-related transcription factor 1	RUNX1	861	209360_s_at	0.903659	-1.64937	0.234548	-1.8343	0.712632	7.47348	56.8809	1.24119e-06	9.54504e-05
NM_003155	stanniocalcin 1	STC1	6781	204597_x_at	3.44224	0.633068	0.812167	-2.75169	-2.36025	7.2831	56.8736	1.24189e-06	9.54504e-05
BC033780	zinc binding alcohol dehydrogenase domain containing 2	ZADH2	284273	1554239_s_at	0.10281	-1.63396	-0.022391	-1.1495	1.22311	6.98854	56.6989	1.25888e-06	9.61552e-05
NM_014020	transmembrane protein 176B	TMEM176B	28959	220532_s_at	1.51675	-0.724854	0.527719	-1.09433	-0.897384	5.39315	56.65	1.26368e-06	9.63872e-05
NM_004900	apolipoprotein B mRNA editing enzyme, catalytic polypeptide-like 3B	APOBEC3B	9582	206632_s_at	-0.387779	4.42869	0.234885	-2.21503	0.231644	5.78186	56.5968	1.26893e-06	9.66526e-05
NM_005566	lactate dehydrogenase A	LDHA	3939	200650_s_at	1.1176	-0.305912	-0.442282	-2.09102	0.673235	12.8038	56.5382	1.27474e-06	9.67227e-05
AI300520	stanniocalcin 1	STC1	6781	204595_s_at	3.14537	-0.173846	0.641071	-2.67551	-1.73113	8.69668	56.3247	1.29621e-06	9.77691e-05
BE567130	---	---		242873_at	-0.425193	-1.83063	-0.403671	-2.75575	3.14168	7.58194	56.0017	1.32952e-06	9.83864e-05
BC005858	fibronectin 1	FN1	2335	211719_x_at	2.23895	1.16617	1.01877	-0.612484	-2.89853	11.2735	55.7446	1.35678e-06	9.93272e-05
AL157471	Fraser syndrome 1	FRAS1	80144	226145_s_at	-2.19333	2.00008	0.935306	-0.41541	1.18004	9.19407	55.0035	1.43927e-06	0.000102374
AK002152	staufen, RNA binding protein, homolog 2 (Drosophila)	STAU2	27067	227179_at	-0.201749	-0.32503	-0.010379	-1.63158	1.40473	6.91041	54.7633	1.46732e-06	0.000103282
BG326592	adenomatosis polyposis coli down-regulated 1-like	APCDD1L	164284	235548_at	0.77773	-0.919062	1.47819	-0.510706	-1.11636	6.36145	54.5393	1.49406e-06	0.000104475
NM_019102	homeobox A5	HOXA5	3202	213844_at	2.80861	-2.74334	1.9403	-2.97857	-1.20198	7.46888	54.5141	1.49711e-06	0.000104552
NM_013453	sperm protein associated with the nucleus, X-linked, family member A1 /// SPANX family, member A2 /// SPANX family, member B1 /// SPANX family, member B2 /// SPANX family, member C /// SPANX family, member F1	SPANXA1 /// SPANXA2 /// SPANXB1 /// SPANXB2 /// SPANXC /// SPANXF1		220922_s_at	-0.0267632	-0.264504	2.57261	-1.03424	-0.910647	5.9789	54.4452	1.50547e-06	0.000104594
AI535683	SWI/SNF related, matrix associated, actin dependent regulator of chromatin, subfamily a, member 2	SMARCA2	6595	217707_x_at	0.651137	-1.56447	0.773192	-2.59166	1.08266	8.54927	54.389	1.51234e-06	0.000104594
AA020826	cathepsin B	CTSB	1508	213274_s_at	2.07099	-0.161286	-0.0391378	-1.94436	-0.69489	7.33077	54.2718	1.52679e-06	0.000104791
AF020589	cytochrome c oxidase subunit VIa polypeptide 1	COX6A1	1337	224344_at	3.09044	-4.44801	-0.814105	-4.60786	2.00687	9.2672	54.0882	1.54975e-06	0.000105139
AF245505	matrix-remodelling associated 5	MXRA5	25878	209596_at	1.8972	-0.769583	1.88321	-0.365515	-2.65247	7.65547	54.0053	1.56026e-06	0.000105478
BC029332	---	---		1570107_at	3.36917	-3.51921	-0.622126	-3.4118	0.493181	8.26671	54.003	1.56055e-06	0.000105478
NM_005795	calcitonin receptor-like	CALCRL	10203	206331_at	-0.0332492	-1.35979	-0.593568	-1.75669	2.05335	6.47356	53.9824	1.56318e-06	0.000105525
AI983428	collagen, type V, alpha 1	COL5A1	1289	212489_at	2.18188	-0.128752	1.68373	-1.08217	-2.54	6.96809	53.1735	1.67065e-06	0.000109399
AK026737	fibronectin 1	FN1	2335	216442_x_at	2.30102	1.07622	0.866684	-0.774501	-2.72122	11.3097	52.6359	1.74705e-06	0.000111079
W86781	---	---		222366_at	-0.878917	2.7706	1.97225	0.210929	-1.50007	6.30588	52.4827	1.7696e-06	0.000111205
BE501862	Rho GTPase activating protein 18	ARHGAP18	93663	225173_at	0.0768865	-0.907143	0.0389155	-2.18464	1.65598	7.37518	51.8191	1.87149e-06	0.000115228
NM_001824	creatine kinase, muscle	CKM	1158	204810_s_at	-0.375575	-0.669172	3.52719	-1.06137	-1.04525	5.35578	51.6802	1.89371e-06	0.000116222
AI524125	protocadherin 9	PCDH9	5101	219737_s_at	0.142857	-1.24669	2.14819	-2.32172	0.388394	6.78093	51.5961	1.90732e-06	0.000116723
NM_153224	hypothetical protein MGC34034	MGC34034	154089	1552899_at	-0.30009	-0.216545	1.88114	-0.45809	-0.57643	4.15315	50.9125	2.02247e-06	0.000119247
AF026219	deleted in liver cancer 1	DLC1	10395	210762_s_at	1.66663	-0.736293	1.41911	-0.199792	-2.23408	7.56764	50.4783	2.10001e-06	0.000121064
AI417917	EH-domain containing 2	EHD2	30846	221870_at	1.11232	-0.0185085	1.0379	-0.728463	-1.31244	7.77356	50.1389	2.16317e-06	0.000122867
NM_001552	insulin-like growth factor binding protein 4	IGFBP4	3487	201508_at	2.22489	0.180016	0.720777	-1.40088	-1.83149	7.8988	49.4438	2.29987e-06	0.000126615
NM_001100	actin, alpha 1, skeletal muscle	ACTA1	58	203872_at	-0.959104	2.5537	2.06124	-0.91165	-0.65852	6.00986	49.381	2.31273e-06	0.000127101
AF098306	sperm protein associated with the nucleus, X-linked, family member A1 /// SPANX family, member A2 /// SPANX family, member C	SPANXA1 /// SPANXA2 /// SPANXC		224032_x_at	0.0830592	-0.36761	1.55437	-0.519012	-0.650762	5.28716	49.2994	2.32958e-06	0.000127353
NM_024563	chromosome 5 open reading frame 23	C5orf23	79614	219054_at	2.85949	-1.16739	0.394172	-1.89289	-1.47121	6.74429	49.2595	2.33788e-06	0.000127626

## Sheet: 8.UpECCvs.PGC
Representative Public ID	Gene Title	Gene Symbol	Entrez Gene	ID	EGCvsREF	ESCvsREF	PGCvsREF	ECCvsREF	IPSCvsREF	AveExpr	F	P.Value	adj.P.Val
NM_018189	developmental pluripotency associated 4	DPPA4	55211	219651_at	-2.05273	5.06969	-0.0214575	4.58596	-2.68016	6.2434	504.204	6.43991e-11	1.94578e-06
BF672169	hypothetical LOC100131138	LOC100131138	100131138	230195_at	-1.43221	2.82116	-1.41399	4.55381	-1.60139	5.53951	417.962	1.51878e-10	1.98931e-06
BE779765	orthodenticle homeobox 2	OTX2	5015	242128_at	-1.51247	3.36552	-1.2247	4.5424	-1.82117	5.04517	401.679	1.82128e-10	1.98931e-06
AI435590	---	---		237193_s_at	-1.37057	3.67197	-1.13327	3.66747	-1.54289	5.57859	377.653	2.41421e-10	2.07018e-06
AW014743	---	---		230356_at	-1.15235	1.92379	-1.28929	4.62761	-1.71447	5.24738	360.481	2.98605e-10	2.07018e-06
AW026426	SOX2 overlapping transcript (non-protein coding)	SOX2OT	347689	231898_x_at	-2.36629	-1.28375	-2.53625	-0.711664	4.95949	5.59419	351.402	3.355e-10	2.07018e-06
NM_000702	ATPase, Na+/K+ transporting, alpha 2 polypeptide	ATP1A2	477	203296_s_at	-1.84658	2.27442	0.554424	3.96274	-1.92301	5.58404	350.118	3.41158e-10	2.07018e-06
NM_020634	growth differentiation factor 3	GDF3	9573	220053_at	-1.10547	0.751603	-1.12463	4.73137	-1.54956	7.15854	292.519	7.74802e-10	3.84675e-06
NM_024865	Nanog homeobox	NANOG	79923	220184_at	-2.11592	4.67599	0.939593	5.05746	-3.44078	7.40366	267.546	1.16378e-09	4.63466e-06
NM_004734	doublecortin-like kinase 1	DCLK1	9201	205399_at	-1.8683	4.30257	-0.629655	4.61653	-2.2238	7.13008	266.72	1.1803e-09	4.63466e-06
BE348466	RNA binding protein with multiple splicing 2	RBPMS2	348093	228802_at	-1.02983	3.76892	-0.0948243	3.24749	-2.32826	8.15226	257.845	1.37707e-09	4.63466e-06
AF268613	POU class 5 homeobox 1 pseudogene 4	POU5F1P4	645682	210905_x_at	-1.4837	2.59222	-1.30354	3.89777	-1.10987	7.42008	250.768	1.56317e-09	4.63466e-06
AW118997	---	---		240681_at	-1.3472	3.6381	-0.286526	3.31915	-1.88725	5.48589	245.006	1.73774e-09	4.63466e-06
BC007230	coagulation factor C homolog, cochlin (Limulus polyphemus)	COCH	1690	1554242_a_at	-2.23887	-0.487709	-1.90268	0.947436	3.03827	6.35747	241.271	1.86365e-09	4.63466e-06
BC001186	protocadherin beta 5	PCDHB5	26167	223629_at	-1.18398	3.03635	-0.0100213	2.86398	-1.73077	5.68633	238.235	1.97422e-09	4.63466e-06
AI191897	ChaC, cation transport regulator homolog 2 (E. coli)	CHAC2	494143	235117_at	-2.66071	0.27084	-2.31826	0.826078	3.56522	7.10625	236.183	2.05351e-09	4.63466e-06
NM_002607	platelet-derived growth factor alpha polypeptide	PDGFA	5154	205463_s_at	-1.04143	2.49087	-0.150065	4.10191	-2.42343	6.43454	235.347	2.08695e-09	4.63466e-06
BC002665	proteolipid protein 1	PLP1	5354	210198_s_at	-3.13425	2.26435	-1.56075	1.93455	2.13026	7.21752	234.61	2.11695e-09	4.63466e-06
BF447038	Sp8 transcription factor	SP8	221833	237449_at	-1.13845	-0.302621	-1.00428	4.54587	-1.12174	4.44797	233.985	2.14281e-09	4.63466e-06
NM_006444	structural maintenance of chromosomes 2	SMC2	10592	204240_s_at	-1.76274	0.986333	-2.11558	1.09521	2.11421	7.19062	233.61	2.15848e-09	4.63466e-06
BG285837	---	---		242881_x_at	-1.27195	-1.2486	-1.05927	5.24043	-1.09929	4.79046	232.382	2.2109e-09	4.63466e-06
AL136825	ubiquitin specific peptidase 44	USP44	84101	224048_at	-2.60233	2.92959	-2.51644	2.8764	1.38582	6.81868	229.027	2.36218e-09	4.63466e-06
BE502537	gamma-aminobutyric acid (GABA) A receptor, beta 3	GABRB3	2562	227690_at	-1.28933	3.51304	-0.89368	3.46614	-1.59666	5.12552	223.748	2.62657e-09	4.71442e-06
AL522781	insulin-like growth factor binding protein-like 1	IGFBPL1	347252	227760_at	-1.34982	3.967	-0.63034	3.18921	-1.67843	6.21898	219.66	2.85644e-09	4.87496e-06
BC043407	hypothetical LOC285401	LOC285401	285401	1557369_a_at	-1.16069	4.10719	-0.921141	3.04591	-1.62488	6.26326	215.669	3.10482e-09	5.13828e-06
AI669815	SRY (sex determining region Y)-box 2	SOX2	6657	228038_at	-3.39814	3.77653	-1.86066	3.99344	0.717442	7.79467	210.344	3.47863e-09	5.557e-06
AF136970	pipecolic acid oxidase	PIPOX	51268	221605_s_at	-1.15726	2.36344	-0.934899	4.04506	-1.704	6.56827	209.26	3.56133e-09	5.557e-06
AI435590	---	---		237192_at	-1.01916	3.63153	-1.08443	2.89705	-1.39976	4.81226	203.276	4.06334e-09	5.93951e-06
NM_003413	Zic family member 3 (odd-paired homolog, Drosophila)	ZIC3	7547	207197_at	-1.3106	4.08181	-1.25328	3.73026	-1.70133	5.29802	202.81	4.10599e-09	5.93951e-06
AA758105	hypothetical protein LOC100292909	LOC100292909	100292909	241535_at	-2.38866	3.14625	-0.918619	3.75566	-0.551449	6.93145	201.431	4.23525e-09	5.93951e-06
BC041481	chromosome 17 open reading frame 104	C17orf104	284071	1562484_at	-1.13092	1.52762	-1.11046	3.86436	-1.21422	4.60408	201.366	4.2415e-09	5.93951e-06
AI203404	LINE-1 type transposase domain containing 1	L1TD1	54596	236894_at	-1.34133	3.79511	-0.424899	2.63922	-1.39992	6.88593	197.978	4.58142e-09	6.12362e-06
BE671123	transmembrane protein 170B	TMEM170B	100113407	235798_at	-1.95562	-0.878168	-1.77521	0.724014	2.94914	5.41196	193.422	5.0925e-09	6.62182e-06
BE138486	---	---		231470_at	-1.03859	2.1268	-0.940178	3.30814	-1.24898	4.86708	189.721	5.55957e-09	6.90056e-06
NM_013243	secretogranin III	SCG3	29106	219196_at	-1.01706	2.67276	-0.872042	2.82549	-1.17617	4.32372	184.231	6.35233e-09	7.38128e-06
AI740721	immunoglobulin superfamily, DCC subclass, member 3	IGDCC3	9543	230960_at	-0.905069	1.66847	-0.371678	3.10717	-1.47475	5.75232	182.969	6.5537e-09	7.4566e-06
BC042959	hypothetical LOC100507455	LOC100507455	100507455	1556194_a_at	-2.13608	-1.31746	-2.14767	0.234358	3.85078	5.53951	181.974	6.71797e-09	7.48752e-06
NM_013315	transmembrane phosphatase with tensin homology	TPTE	7179	220205_at	-0.784535	-0.869076	-0.676888	3.68874	-0.933673	4.34411	175.782	7.86067e-09	8.20899e-06
BC002712	v-myc myelocytomatosis viral related oncogene, neuroblastoma derived (avian)	MYCN	4613	209757_s_at	-1.11965	3.39407	0.325505	3.57754	-2.61374	7.2612	174.579	8.10937e-09	8.20899e-06
NM_006681	neuromedin U	NMU	10874	206023_at	-1.69528	2.7517	1.05835	2.41953	-1.54053	7.03011	173.524	8.33547e-09	8.20899e-06
AA215381	---	---		243154_at	-0.375623	0.619438	-0.971749	2.94599	-1.14702	6.08398	171.428	8.80777e-09	8.27475e-06
NM_002701	POU class 5 homeobox 1 /// POU class 5 homeobox 1B /// POU class 5 homeobox 1 pseudogene 3 /// POU class 5 homeobox 1 pseudogene 4	POU5F1 /// POU5F1B /// POU5F1P3 /// POU5F1P4		208286_x_at	-0.799148	1.9845	-0.790662	3.05317	-1.37069	8.70756	170.868	8.93945e-09	8.27475e-06
BE783065	small nuclear ribonucleoprotein polypeptide N	SNRPN	6638	226587_at	-2.2129	4.13173	-0.169509	2.50098	-0.718659	8.371	169.225	9.33971e-09	8.3618e-06
NM_014278	heat shock 70kDa protein 4-like	HSPA4L	22824	205543_at	-1.73231	-0.570325	-1.75075	-0.0174105	3.10119	6.25868	167.951	9.66524e-09	8.51367e-06
BC002477	dehydrogenase E1 and transketolase domain containing 1	DHTKD1	55526	209916_at	-1.88191	0.911821	-1.04766	1.89196	1.0151	7.69079	165.524	1.03247e-08	8.95019e-06
NM_133329	potassium voltage-gated channel, subfamily G, member 3	KCNG3	170850	1552897_a_at	-0.873904	2.27134	-1.01602	3.1204	-1.28613	5.03191	163.635	1.08759e-08	9.0991e-06
D82346	potassium voltage-gated channel, KQT-like subfamily, member 2	KCNQ2	3785	210508_s_at	-0.723833	2.17048	-0.820132	2.75247	-1.28788	6.26364	163.238	1.09963e-08	9.0991e-06
NM_173648	coiled-coil domain containing 141	CCDC141	285025	1553645_at	-0.845548	1.65105	-0.60674	2.62881	-1.05285	4.63867	162.415	1.12513e-08	9.17116e-06
AF229180	aminoadipate-semialdehyde synthase	AASS	10157	210852_s_at	-2.23131	4.36351	-0.819914	0.691426	0.862465	7.22191	160.592	1.18416e-08	9.30287e-06
BC041970	family with sequence similarity 201, member A	FAM201A	158228	1557014_a_at	-1.48173	-0.508667	-1.30749	1.54002	1.49627	5.37004	160.536	1.18604e-08	9.30287e-06
AB007830	scavenger receptor class A, member 3	SCARA3	51435	223843_at	-0.493134	-0.36126	-0.291252	3.0848	-1.24881	5.09671	160.296	1.1941e-08	9.30287e-06
AK091930	Hypothetical protein LOC100288099	LOC100288099	100288099	1556469_s_at	-0.996161	3.57607	-0.999502	2.17088	-0.976778	5.07035	159.771	1.21199e-08	9.30287e-06
AU148391	hypothetical LOC100506918	LOC100506918	100506918	232105_at	-0.341	-0.0290175	-0.491502	3.63721	-1.74647	5.96158	159.353	1.22646e-08	9.30287e-06
BF057731	major histocompatibility complex, class II, DP beta 2 (pseudogene)	HLA-DPB2	3116	239975_at	-1.18095	4.52407	-1.03807	2.70245	-1.43666	5.07907	157.201	1.30438e-08	9.75837e-06
Z98443	WD repeat domain 72	WDR72	256764	227174_at	-1.63437	2.78521	0.0229866	4.14228	-2.07088	5.92081	153.912	1.43546e-08	1.0394e-05
AI686283	---	---		240267_at	-0.730532	2.46039	-1.00822	2.17232	-0.865664	5.66184	153.653	1.44643e-08	1.0394e-05
W23691	---	---		243416_at	-1.36369	1.65576	-0.547346	2.80246	-0.691644	6.4414	149.671	1.629e-08	1.12614e-05
AI962352	---	---		231690_at	-0.839338	1.62983	-0.739261	2.73209	-1.03249	4.78459	147.464	1.74233e-08	1.18943e-05
NM_017938	family with sequence similarity 70, member A	FAM70A	55026	219895_at	-0.638959	-1.25717	-1.20279	4.5951	-1.20352	4.55955	146.687	1.78448e-08	1.19256e-05
AW183154	kinesin family member 14	KIF14	9928	236641_at	-2.48084	1.92812	-2.21639	3.08335	1.26017	6.64066	146.576	1.7906e-08	1.19256e-05
AI827820	methyl-CpG binding domain protein 2	MBD2	8932	214396_s_at	-1.24959	2.94157	-0.949106	3.16328	-1.20705	5.25887	145.962	1.82491e-08	1.20077e-05
AL365406	zinc finger RNA binding protein 2	ZFR2	23217	233064_at	-0.903972	1.52361	0.211127	2.61409	-1.48738	6.09798	145.248	1.86586e-08	1.2131e-05
AW960707	quinolinate phosphoribosyltransferase	QPRT	23475	242414_at	0.248474	0.405794	0.447957	3.00382	-2.68492	9.0101	143.767	1.95438e-08	1.2557e-05
AI554106	polyhomeotic homolog 1 (Drosophila)	PHC1	1911	225958_at	-1.73443	2.60446	-1.15612	3.73631	-0.853839	8.78359	142.731	2.0194e-08	1.2812e-05
L07335	SRY (sex determining region Y)-box 2	SOX2	6657	213721_at	-1.52183	2.10619	-1.34669	3.0665	-0.326777	7.03161	142.02	2.06551e-08	1.2812e-05
AF070651	zinc finger protein 257	ZNF257	113835	210697_at	-0.527869	-0.735384	-0.630219	3.01605	-0.817555	4.13206	141.781	2.08132e-08	1.2812e-05
AB020690	paraneoplastic antigen MA2	PNMA2	10687	209598_at	-1.02774	0.599536	-1.18712	4.72813	-1.53278	6.06214	141.682	2.08791e-08	1.2812e-05
AK022821	developmental pluripotency associated 4	DPPA4	55211	232985_s_at	-1.58463	4.4229	-0.741356	4.84764	-2.62719	6.9521	140.447	2.17224e-08	1.29597e-05
AA927533	hypothetical LOC100509302	LOC100509302	100509302	242135_at	-0.870581	-0.983996	-0.290803	3.48702	-0.932229	5.04367	139.228	2.2595e-08	1.29597e-05
AB007875	KIAA0415	KIAA0415	9907	209913_x_at	-1.25256	2.21026	-0.604776	2.43733	-0.705896	6.0312	138.658	2.30181e-08	1.29597e-05
AF295726	chromosome 18 open reading frame 2	C18orf2	56651	223977_s_at	-0.726092	-0.781046	-0.530511	2.85505	-0.563252	4.53971	136.641	2.45947e-08	1.35676e-05
NM_005044	protein kinase, X-linked	PRKX	5613	204061_at	-1.63256	1.00242	-1.74861	1.83255	1.24246	6.68158	136.111	2.50305e-08	1.36333e-05
NM_152573	RAS and EF-hand domain containing	RASEF	158158	1553185_at	-1.42592	2.67325	0.576053	2.0931	-1.24459	9.13909	135.29	2.57246e-08	1.37735e-05
AJ271379	spindlin family, member 3	SPIN3	169981	1555882_at	-1.00671	0.0314629	-1.95974	1.4408	1.34218	5.73594	134.41	2.6494e-08	1.38829e-05
AW592266	v-myb myeloblastosis viral oncogene homolog (avian)-like 1	MYBL1	4603	213906_at	-2.12908	1.3896	-1.75173	1.84756	1.60199	5.64778	133.949	2.69084e-08	1.38829e-05
NM_004426	polyhomeotic homolog 1 (Drosophila)	PHC1	1911	218338_at	-1.32123	2.27873	-0.900373	3.28632	-1.02898	9.49748	133.36	2.74497e-08	1.40104e-05
AU151635	---	---		232111_at	-1.33609	3.15111	-0.473214	3.23163	-1.55322	6.452	132.985	2.78011e-08	1.40583e-05
AI693153	gamma-aminobutyric acid (GABA) A receptor, beta 3	GABRB3	2562	229724_at	-1.12868	4.45728	-0.0666263	2.12958	-1.73238	5.46131	130.468	3.03067e-08	1.49485e-05
N90755	CAP, adenylate cyclase-associated protein, 2 (yeast)	CAP2	10486	212554_at	-2.60667	-0.278873	-0.640386	1.48483	2.13666	7.46644	130.39	3.03884e-08	1.49485e-05
R38389	olfactomedin 1	OLFM1	10439	213131_at	-0.797445	2.86596	-0.846669	3.26976	-1.77327	6.30668	130.249	3.05381e-08	1.49485e-05
AI760495	cytochrome c, somatic	CYCS	54205	244546_at	-1.75441	0.534737	-1.17337	0.7968	1.82721	5.25916	129.881	3.09301e-08	1.49485e-05
NM_173553	tripartite motif family-like 2	TRIML2	205860	1552580_at	-0.718314	1.53952	-0.91897	2.7125	-0.990548	5.54907	128.305	3.26836e-08	1.55213e-05
NM_017489	telomeric repeat binding factor (NIMA-interacting) 1	TERF1	7013	203449_s_at	-1.75175	3.57512	-0.644977	1.53614	-0.0340625	9.0695	127.527	3.35926e-08	1.57084e-05
AB002438	sema domain, transmembrane domain (TM), and cytoplasmic domain, (semaphorin) 6A	SEMA6A	57556	215028_at	-2.00825	3.56135	-0.868491	3.35716	-0.837976	6.51481	127.048	3.4169e-08	1.57084e-05
BG054792	---	---		237778_at	-0.831918	2.77312	-0.839358	2.30647	-1.07053	5.14768	126.807	3.44625e-08	1.57084e-05
NM_021127	phorbol-12-myristate-13-acetate-induced protein 1	PMAIP1	5366	204286_s_at	-1.47275	2.26296	-2.40541	3.40916	0.0492612	7.4397	126.764	3.45157e-08	1.57084e-05
AF229179	transmembrane protein 27	TMEM27	57393	223784_at	-0.953414	0.35045	-0.180653	2.88342	-0.965249	4.41042	126.04	3.54193e-08	1.58916e-05
AK001570	filamin A interacting protein 1	FILIP1	27145	231945_at	-0.789394	1.32487	-0.321565	2.76887	-1.28377	5.40405	125.837	3.56776e-08	1.58916e-05
H06509	WNK lysine deficient protein kinase 3	WNK3	65267	232282_at	-0.965283	0.730246	-1.06883	3.09794	-0.630875	5.72992	124.77	3.7076e-08	1.62114e-05
W46994	---	---		229417_at	-1.83021	-0.289339	-1.43929	1.51197	1.8782	6.2518	124.185	3.78697e-08	1.64141e-05
BG165011	proline rich 11	PRR11	55771	228273_at	-2.26175	1.87297	-1.64879	1.82874	1.51745	9.39177	123.609	3.86733e-08	1.65195e-05
AW016812	---	---		231644_at	-1.4415	3.75791	-0.795844	3.68202	-1.73526	5.36526	123.577	3.87178e-08	1.65195e-05
BC013077	---	---		1558522_at	-1.52889	0.484233	-1.83122	1.18588	1.79771	5.43084	122.527	4.0238e-08	1.69126e-05
BC038199	zinc finger protein 208	ZNF208	7757	1568646_x_at	-0.685279	-0.917002	-0.698801	3.31464	-0.752943	4.23046	122.27	4.06202e-08	1.69343e-05
NM_018685	anillin, actin binding protein	ANLN	54443	1552619_a_at	-1.96417	0.701543	-2.39716	3.18547	1.20478	6.80857	122.029	4.09839e-08	1.69565e-05
AI478781	gamma-aminobutyric acid (GABA) A receptor, beta 3	GABRB3	2562	227830_at	-1.00307	4.0895	-0.686544	2.83676	-1.79358	6.36519	120.844	4.28279e-08	1.73487e-05
AF155117	kinesin family member 21A	KIF21A	55605	231875_at	-2.09585	-1.40841	-1.90632	1.85156	2.60183	5.76254	120.044	4.41304e-08	1.75919e-05
AW007080	interleukin 17 receptor D	IL17RD	54756	227997_at	-1.30774	1.96887	0.953782	2.97426	-1.96725	8.4603	119.221	4.55195e-08	1.77203e-05
AL080135	testis-specific transcript, Y-linked 15 (non-protein coding)	TTTY15	64595	214983_at	-0.894947	0.636095	-1.78011	0.977	1.21832	6.06552	119.099	4.57303e-08	1.77203e-05
AI357639	---	---		225716_at	-2.53978	-0.138266	-1.02375	1.26999	2.42171	7.92863	119.088	4.57502e-08	1.77203e-05
AJ278112	DEP domain containing 1	DEPDC1	55635	232278_s_at	-1.86346	-0.190829	-2.23358	2.60161	1.68172	6.20178	118.443	4.68833e-08	1.79052e-05
AI803485	URB1 ribosome biogenesis 1 homolog (S. cerevisiae)	URB1	9875	212996_s_at	-1.68661	0.822847	-0.644483	0.925008	1.22531	6.80531	118.085	4.75279e-08	1.80253e-05
BF671894	required for meiotic nuclear division 5 homolog A (S. cerevisiae)	RMND5A	64795	212482_at	-1.36022	0.301102	-1.28185	1.04936	1.41484	8.64212	116.923	4.96938e-08	1.84097e-05
BG179854	myelin expression factor 2	MYEF2	50804	222772_at	-1.86103	0.352508	-1.35409	1.7733	1.46406	6.45143	116.467	5.05771e-08	1.84718e-05
AL109688	---	---		1562169_at	-0.863286	1.26501	-0.676051	2.60836	-0.846588	4.53156	116.387	5.07345e-08	1.84718e-05
AI452512	transmembrane protein 20	TMEM20	159371	236219_at	-0.971072	-0.70604	-1.53882	0.465434	1.92201	5.28364	115.167	5.32019e-08	1.86967e-05
BF510715	fibroblast growth factor 4	FGF4	2249	206783_at	-0.700092	1.92472	-0.46154	2.74459	-1.46351	6.71771	115.069	5.34049e-08	1.86967e-05
AI768144	---	---		237383_at	-0.721226	2.99862	-0.468091	2.01653	-1.31061	5.65663	115.05	5.34444e-08	1.86967e-05
CA503291	UDP-GlcNAc:betaGal beta-1,3-N-acetylglucosaminyltransferase 7	B3GNT7	93010	1555963_x_at	-0.427256	1.4324	-0.453621	2.17787	-1.19971	5.4986	115.034	5.34779e-08	1.86967e-05
AI800470	---	---		242836_at	-0.906036	0.825689	-0.766306	2.75831	-0.697196	4.59261	114.55	5.45032e-08	1.87818e-05
AL834519	---	---		1562289_at	-0.636187	2.68856	-0.486619	1.48307	-0.924299	6.28032	114.467	5.46814e-08	1.87818e-05
NM_018936	protocadherin beta 2	PCDHB2	56133	231725_at	-0.465209	2.34407	-0.439843	2.1492	-1.45572	5.23899	114.281	5.50854e-08	1.88024e-05
AV723914	family with sequence similarity 19 (chemokine (C-C motif)-like), member A5	FAM19A5	25817	229459_at	-0.722221	1.17776	-0.32946	2.88737	-1.37564	4.64615	114.075	5.55345e-08	1.88379e-05
BC036488	---	---		1554007_at	-1.96849	3.23226	-1.479	3.55531	-0.493132	9.13634	113.899	5.59223e-08	1.88524e-05
AI631657	hypothetical LOC100505946	LOC100505946	100505946	238632_at	-0.579239	0.210773	-0.735559	3.02326	-1.01615	4.53524	112.993	5.79694e-08	1.91598e-05
AW136397	Proteasome (prosome, macropain) assembly chaperone 4	PSMG4	389362	242055_at	-0.50519	2.0782	-0.952717	1.78565	-0.742829	4.79547	112.877	5.82375e-08	1.91598e-05
AA287457	chromosome 12 open reading frame 73	C12orf73	728568	226943_at	-1.03415	-0.94625	-1.50908	0.524207	2.00614	7.49434	112.011	6.02946e-08	1.96018e-05
BE502594	abhydrolase domain containing 12B	ABHD12B	145447	237974_at	-0.709408	0.966269	-0.710584	2.63546	-0.895936	4.23448	112.008	6.03014e-08	1.96018e-05
AV720650	family with sequence similarity 169, member A	FAM169A	26049	235048_at	-2.66438	2.2212	-0.693948	2.35178	0.81876	7.87817	111.861	6.06578e-08	1.96018e-05
NM_002196	insulinoma-associated 1	INSM1	3642	206502_s_at	-0.591535	-0.282735	-0.686078	3.04671	-0.887972	4.53164	111.276	6.21089e-08	1.9836e-05
NM_017784	oxysterol binding protein-like 10	OSBPL10	114884	219073_s_at	0.271813	2.34584	-1.53573	1.64244	-1.1249	7.61674	110.132	6.50662e-08	2.02965e-05
U00954	UDP-glucose pyrophosphorylase 2	UGP2	7360	232180_at	-0.980023	4.55037	0.119065	1.62774	-1.70131	6.40437	109.865	6.57807e-08	2.02965e-05
AA757457	family with sequence similarity 19 (chemokine (C-C motif)-like), member A4	FAM19A4	151647	242348_at	-0.723507	0.763634	-0.554705	2.57735	-0.879471	4.25485	109.481	6.68261e-08	2.0334e-05
BC021286	chromosome 1 open reading frame 187	C1orf187	374946	1554340_a_at	-0.845622	1.70459	-0.758202	2.77414	-1.06653	4.38507	109.341	6.72109e-08	2.0334e-05
NM_007274	acyl-CoA thioesterase 7	ACOT7	11332	208002_s_at	-1.92913	1.63893	-0.948636	0.663158	1.57313	8.38727	109.054	6.8011e-08	2.0334e-05
AI802969	---	---		242909_at	-0.846902	2.47847	-0.74899	1.90733	-0.751484	4.57974	108.771	6.88106e-08	2.04237e-05
U94364	glycogenin 2	GYG2	8908	210964_s_at	-0.0564169	1.40493	-0.904105	2.14957	-1.2422	5.97179	108.234	7.03596e-08	2.07705e-05
BF446180	programmed cell death 2	PDCD2	5134	213581_at	-1.81356	0.928854	-1.44674	0.839303	1.9089	7.67618	107.873	7.14265e-08	2.09721e-05
NM_006143	G protein-coupled receptor 19	GPR19	2842	207183_at	-0.7728	1.73062	-0.436843	3.5414	-1.87378	6.00413	107.608	7.22194e-08	2.10915e-05
AW974812	---	---		222325_at	-1.4514	2.8969	-0.209118	3.50077	-1.70866	5.09348	107.08	7.38367e-08	2.13357e-05
BE613178	cystathionine-beta-synthase	CBS	875	212816_s_at	-1.98961	1.89797	-2.75076	2.33405	1.63476	7.69891	106.892	7.44233e-08	2.1392e-05
AK092243	PHD finger protein 21B	PHF21B	112885	1562309_s_at	-0.553485	2.95454	-0.373439	1.41561	-1.12614	4.68942	106.722	7.49561e-08	2.14139e-05
AL135396	family with sequence similarity 72, member A /// family with sequence similarity 72, member B /// family with sequence similarity 72, member C /// family with sequence similarity 72, member D	FAM72A /// FAM72B /// FAM72C /// FAM72D		225834_at	-2.71859	2.17651	-2.93552	3.92941	1.3305	8.4206	106.423	7.59079e-08	2.14586e-05
NM_018423	serine/threonine/tyrosine kinase 1	STYK1	55359	220030_at	-2.07332	-0.215392	-1.76505	0.367441	3.07686	5.69149	106.324	7.62268e-08	2.14586e-05
BE927766	---	---		241893_at	-0.45547	2.81916	-0.672881	1.6373	-1.12719	4.98779	105.906	7.75918e-08	2.1478e-05
NM_018098	epithelial cell transforming sequence 2 oncogene	ECT2	1894	219787_s_at	-1.95825	2.05591	-2.61174	2.50751	1.34243	8.27894	105.694	7.82926e-08	2.1478e-05
AA491949	---	---		241897_at	-0.614419	3.63738	0.625422	2.67725	-2.79982	6.7671	105.355	7.94332e-08	2.1478e-05
NM_006875	pim-2 oncogene	PIM2	11040	204269_at	-0.74301	1.21045	-0.70256	2.44625	-0.822934	7.11004	105.274	7.9707e-08	2.1478e-05
BF111626	centromere protein N	CENPN	55839	228559_at	-1.95383	0.779891	-0.617429	2.10058	0.705106	7.1779	105.176	8.0041e-08	2.1478e-05
AI670947	connector enhancer of kinase suppressor of Ras 2	CNKSR2	22866	229116_at	-1.78235	1.58029	-1.47181	0.585172	1.84668	5.83951	105.121	8.02285e-08	2.1478e-05
T78081	---	---		242276_at	-0.570524	-0.899493	-0.836088	3.14579	-0.669447	5.14867	104.529	8.22951e-08	2.19238e-05
AA594937	cordon-bleu homolog (mouse)	COBL	23242	213050_at	-0.645582	2.91039	-0.508772	2.57939	-1.70496	6.7239	104.04	8.40476e-08	2.2282e-05
NM_003385	visinin-like 1	VSNL1	7447	203798_s_at	-2.14318	0.0925027	-1.94355	1.77335	2.22581	6.2086	102.921	8.82324e-08	2.30404e-05
AA939270	importin 7	IPO7	10527	200993_at	-0.94619	0.887355	-2.3847	1.29151	1.3792	9.98863	102.545	8.96968e-08	2.31751e-05
AK093435	hypothetical locus LOC388666	FLJ36116	388666	1564413_at	-0.850772	3.53246	-0.042538	1.89195	-1.55966	6.8777	102.443	9.00971e-08	2.31751e-05
M32721	poly (ADP-ribose) polymerase 1	PARP1	142	208644_at	-1.86734	1.73908	-0.795476	1.84498	0.587974	9.77903	102.346	9.04814e-08	2.31751e-05
AA825721	---	---		242228_at	-1.42413	2.10093	-1.7275	2.14914	0.442726	5.73436	102.163	9.12147e-08	2.31751e-05
AF268617	POU class 5 homeobox 1 pseudogene 3	POU5F1P3	642559	210265_x_at	-1.38297	2.44198	-1.6946	4.56882	-1.34717	7.55968	101.851	9.24769e-08	2.33817e-05
AF519622	hypothetical protein LOC283027	LOC283027	283027	1562527_at	-0.538436	2.79432	-0.71255	1.25806	-0.756676	4.10546	101.425	9.42339e-08	2.37161e-05
BG164358	DEAD (Asp-Glu-Ala-Asp) box polypeptide 21	DDX21	9188	224654_at	-1.2716	1.33432	-2.1016	0.707721	1.75609	10.1457	100.632	9.76183e-08	2.44126e-05
BC001305	ELOVL family member 6, elongation of long chain fatty acids (FEN1/Elo2, SUR4/Elo3-like, yeast)	ELOVL6	79071	210868_s_at	-1.98453	1.78742	-1.70094	0.85567	1.95224	6.84967	100.393	9.86642e-08	2.44925e-05
R56118	Hypothetical protein LOC100288092	LOC100288092	100288092	235147_at	-1.45897	0.00105218	-1.49913	0.446354	2.16047	5.23892	100.084	1.0004e-07	2.45372e-05
AI435595	transmembrane protein 132B	TMEM132B	114795	236824_at	-1.01849	3.23851	-0.733388	2.62476	-1.32192	4.72859	100.05	1.00192e-07	2.45372e-05
BE326710	chromosome 12 open reading frame 39	C12orf39	80763	229778_at	-0.615141	-0.709674	-0.371907	2.47002	-0.547045	4.00952	99.7934	1.01356e-07	2.47114e-05
NM_002590	protocadherin 8	PCDH8	5100	206935_at	-0.800632	1.71472	-0.587019	2.13995	-0.806228	4.1939	99.318	1.03554e-07	2.5135e-05
NM_032805	zinc finger and SCAN domain containing 10	ZSCAN10	84891	1553874_a_at	-0.851178	3.22407	-1.00176	1.7793	-0.74187	5.8366	98.6348	1.06814e-07	2.55852e-05
BF724206	---	---		244457_at	-0.721085	1.34099	0.572609	2.1862	-1.56512	6.38137	98.3114	1.084e-07	2.58519e-05
AK001166	DEP domain containing 1B	DEPDC1B	55789	226980_at	-2.54362	2.46611	-1.96165	2.09896	1.63004	6.8282	97.6928	1.11517e-07	2.63648e-05
AA572726	---	---		244610_x_at	-0.753669	2.11974	0.320764	1.65537	-1.27033	5.15428	96.9682	1.15306e-07	2.70267e-05
AU156421	---	---		233413_at	-0.776194	5.77947	-0.636646	0.393901	-0.988466	4.50478	96.7333	1.16568e-07	2.71195e-05
AI950078	zinc finger protein 398	ZNF398	57541	228145_s_at	-1.41412	2.07202	-1.44592	3.04938	-0.345528	8.20888	96.7008	1.16744e-07	2.71195e-05
AA514237	hypothetical LOC100509655	LOC100509655	100509655	239781_at	-0.830159	0.851866	-0.738403	3.45426	-1.26437	5.85797	96.5036	1.17819e-07	2.71195e-05
BF739979	pyruvate dehydrogenase (lipoamide) alpha 1	PDHA1	5160	200979_at	-1.68022	0.168701	-1.15228	1.43369	1.43638	7.46251	96.4369	1.18185e-07	2.71195e-05
AI701943	---	---		243233_at	-0.812674	2.15544	-0.150416	2.05688	-1.17678	5.18277	96.1306	1.19884e-07	2.71697e-05
AW135279	cyclin Y-like 1	CCNYL1	151195	228810_at	-1.48858	1.49566	-1.60162	1.91669	0.779981	6.063	96.1284	1.19896e-07	2.71697e-05
AF119847	---	---		234032_at	-0.719374	3.18179	-0.193325	2.1869	-1.67027	5.86362	95.8174	1.21653e-07	2.74117e-05
NM_014317	prenyl (decaprenyl) diphosphate synthase, subunit 1	PDSS1	23590	220865_s_at	-1.81319	0.868356	-1.86134	0.923435	2.14901	6.587	95.6867	1.224e-07	2.74117e-05
AI129626	doublecortin-like kinase 1	DCLK1	9201	229800_at	-1.36942	3.85706	-0.837601	2.55392	-1.06048	5.63473	95.6745	1.2247e-07	2.74117e-05
BF108778	---	---		235363_at	-2.25047	3.12682	-1.81522	2.35894	0.845719	6.82289	95.413	1.23984e-07	2.76372e-05
AI934407	dehydrogenase E1 and transketolase domain containing 1	DHTKD1	55526	227094_at	-1.49462	1.76772	-1.90484	1.96092	0.867989	8.00829	95.1041	1.258e-07	2.77729e-05
AI953354	---	---		232254_at	-1.33191	0.889971	-1.15051	-0.0568999	1.84019	6.03066	94.8522	1.27306e-07	2.77729e-05
R43158	fragile X mental retardation, autosomal homolog 1	FXR1	8087	230201_at	-2.03431	2.23342	-0.606756	1.54159	0.666615	6.66802	94.8098	1.27562e-07	2.77729e-05
AA825563	---	---		239292_at	-0.331861	2.52401	-1.35291	2.32043	-1.15449	5.35251	94.7963	1.27643e-07	2.77729e-05
NM_018131	centrosomal protein 55kDa	CEP55	55165	218542_at	-1.72198	1.48545	-1.50873	1.7522	1.06452	7.13942	94.5968	1.28855e-07	2.78194e-05
AK025651	hypothetical LOC100507192	LOC100507192	100507192	221648_s_at	-1.19297	1.4218	-1.07908	1.89613	0.174341	5.48228	93.9132	1.33117e-07	2.86216e-05
AI801563	Carbonic anhydrase VB pseudogene	CA5BP	340591	239106_at	-1.48931	0.611808	-1.55602	1.48565	1.33229	5.99616	93.7907	1.33898e-07	2.86768e-05
BQ944989	Serine/threonine kinase receptor associated protein	STRAP	11171	1558002_at	-0.915691	0.127908	-0.164709	2.41029	-0.623999	6.53532	92.8091	1.40367e-07	2.95979e-05
NM_152476	zinc finger protein 560	ZNF560	147741	1553276_at	-0.620464	1.49158	-0.658203	1.92038	-0.718182	4.06127	92.5729	1.41979e-07	2.98045e-05
AW294765	F-box protein 22	FBXO22	26263	225734_at	-1.57134	1.04592	-1.96971	1.5239	1.51991	7.53919	92.349	1.4353e-07	2.98045e-05
AA669336	coagulation factor C homolog, cochlin (Limulus polyphemus)	COCH	1690	205229_s_at	-2.46452	0.717678	-2.34773	1.04769	3.09199	7.67889	91.9794	1.46133e-07	3.02302e-05
BF059748	glucosaminyl (N-acetyl) transferase 2, I-branching enzyme (I blood group)	GCNT2	2651	230788_at	-1.45024	4.6527	-0.180517	2.88635	-1.90454	6.92845	91.6841	1.48255e-07	3.05533e-05
AW772140	WD repeat and HMG-box DNA binding protein 1	WDHD1	11169	204727_at	-1.85348	1.90691	-1.92491	2.87943	0.581504	5.44578	91.0766	1.52739e-07	3.12434e-05
NM_014321	origin recognition complex, subunit 6	ORC6	23594	219105_x_at	-1.86082	1.68558	-0.446645	1.25386	0.760818	9.41436	91.0755	1.52747e-07	3.12434e-05
AL533838	tubulin, beta 2B	TUBB2B	347733	214023_x_at	-0.876936	4.26528	1.07225	2.95573	-3.23015	8.56065	90.8826	1.54205e-07	3.1424e-05
AV730849	SLAIN motif family, member 1	SLAIN1	122060	225619_at	-2.12763	0.710958	-2.06854	0.521715	2.92186	6.73439	90.628	1.56156e-07	3.17032e-05
NM_031283	transcription factor 7-like 1 (T-cell specific, HMG-box)	TCF7L1	83439	221016_s_at	0.092824	3.11159	-0.199618	1.92645	-2.28124	7.08358	90.1256	1.60095e-07	3.23825e-05
BC005170	minichromosome maintenance complex component 8	MCM8	84515	224320_s_at	-2.11493	1.17446	-1.61193	1.79889	1.5988	6.11698	89.8618	1.62211e-07	3.26894e-05
AF232238	hairy/enhancer-of-split related with YRPW motif 2	HEY2	23493	222921_s_at	0.121628	1.52182	0.457225	1.79767	-2.13216	6.46478	89.3401	1.66498e-07	3.34299e-05
R62424	somatostatin receptor 1	SSTR1	6751	235591_at	-0.543417	-0.755897	-0.927214	3.51715	-0.93124	4.62209	88.0871	1.7737e-07	3.51471e-05
AV733347	partner of NOB1 homolog (S. cerevisiae)	PNO1	56902	242905_at	-1.54768	0.286744	-1.67128	1.33989	1.67302	5.84834	88.063	1.77588e-07	3.51471e-05
BE897866	acyl-CoA dehydrogenase, short/branched chain	ACADSB	36	226030_at	-1.0861	-0.426474	-1.24208	-0.0122229	2.06446	6.26534	88.059	1.77624e-07	3.51471e-05
AJ271832	protein phosphatase, Mg2+/Mn2+ dependent, 1B	PPM1B	5495	213225_at	-1.14029	2.76169	-1.29585	1.81229	-0.124565	8.40313	87.868	1.79359e-07	3.53348e-05
AW449813	SLIT and NTRK-like family, member 5	SLITRK5	26050	214930_at	-1.99993	-0.624436	-1.33824	0.950319	2.46669	6.66592	87.7422	1.80514e-07	3.53348e-05
NM_007309	diaphanous homolog 2 (Drosophila)	DIAPH2	1730	205603_s_at	-2.43538	2.22823	-1.31808	3.51886	0.225455	7.52133	87.581	1.82006e-07	3.53734e-05
AU150319	vesicle-associated membrane protein 1 (synaptobrevin 1)	VAMP1	6843	213326_at	-1.52252	1.83923	-0.670788	2.77394	-0.492659	7.22582	87.4207	1.83505e-07	3.54912e-05
AW513477	zinc finger protein 721	ZNF721	170960	228029_at	-1.81246	2.48717	0.336106	1.3584	-0.146266	8.22995	87.3774	1.83912e-07	3.54912e-05
NM_004289	nuclear factor (erythroid-derived 2)-like 3	NFE2L3	9603	204702_s_at	-1.82686	2.49485	-1.35623	3.88846	-0.692906	6.88903	87.2654	1.84972e-07	3.557e-05
NM_014875	kinesin family member 14	KIF14	9928	206364_at	-2.34657	1.36082	-1.17903	2.65378	0.909793	7.88653	86.608	1.9134e-07	3.66655e-05
U00238	phosphoribosyl pyrophosphate amidotransferase	PPAT	5471	209434_s_at	-1.5552	1.70897	-1.80465	1.54466	1.15887	7.94782	86.4048	1.93362e-07	3.67947e-05
NM_001905	CTP synthase	CTPS	1503	202613_at	-2.65458	0.281853	-0.561421	1.8477	1.70311	8.26604	86.1715	1.95716e-07	3.71133e-05
AI027091	transmembrane protein 232	TMEM232	642987	239776_at	-0.721236	1.78748	-0.691668	1.73435	-0.569711	3.87321	86.0836	1.96611e-07	3.71541e-05
NM_006741	protein phosphatase 1, regulatory (inhibitor) subunit 1A	PPP1R1A	5502	205478_at	-0.780466	-0.251697	0.955909	2.60304	-1.50827	5.97979	85.9638	1.97841e-07	3.72575e-05
AI620827	zinc finger protein 600	ZNF600	162966	242463_x_at	-0.653044	3.40433	-0.699507	1.58407	-1.07144	5.56728	85.8376	1.99146e-07	3.73745e-05
AB040910	MAP/microtubule affinity-regulating kinase 1	MARK1	4139	226653_at	-1.50224	0.597869	-1.26631	1.71126	1.00631	5.57285	85.7616	1.99937e-07	3.73944e-05
W57613	---	---		236180_at	-0.347443	1.35939	-0.07668	1.92429	-1.33742	5.97825	85.5985	2.01647e-07	3.75855e-05
AL577977	chromosome 12 open reading frame 32	C12orf32	83695	225837_at	-1.6571	0.27861	-1.52395	2.67738	0.795282	7.7691	85.41	2.03647e-07	3.77009e-05
BE503584	phosphorylase kinase, alpha 1 (muscle)	PHKA1	5255	229876_at	-1.34171	-0.611365	-1.34049	1.57226	1.39098	6.82318	85.0391	2.0765e-07	3.81097e-05
AI672541	imprinted in Prader-Willi syndrome (non-protein coding)	IPW	3653	213447_at	-1.40705	2.75267	-1.48117	1.51822	0.464798	8.45865	84.9018	2.09156e-07	3.81097e-05
AL519818	cirrhosis, autosomal recessive 1A (cirhin)	CIRH1A	84916	224903_at	-1.41704	0.692998	-0.583103	0.798163	1.04266	9.67147	84.8848	2.09344e-07	3.81097e-05
NM_022782	M-phase phosphoprotein 9	MPHOSPH9	10198	206205_at	-1.31901	0.87614	-1.88106	1.64249	1.18601	6.51915	84.3943	2.14841e-07	3.89805e-05
BC007257	cystathionine-beta-synthase	CBS	875	1553972_a_at	-2.02629	1.76733	-1.89235	2.21393	1.22279	8.82173	84.2337	2.1668e-07	3.9184e-05
AK026714	Pellino homolog 1 (Drosophila)	PELI1	57162	232304_at	-0.699776	1.82124	-0.972727	2.19403	-0.721508	5.07131	83.9964	2.19431e-07	3.95505e-05
AA843962	anoctamin 5	ANO5	203859	229313_at	-2.1516	0.277461	-1.63794	0.638767	2.72523	6.96612	83.8941	2.2063e-07	3.96358e-05
NM_020445	ARP3 actin-related protein 3 homolog B (yeast)	ACTR3B	57180	218868_at	-1.93624	0.770829	-1.63416	2.04971	1.40226	7.279	83.5864	2.24286e-07	4.01604e-05
BF476502	guanine nucleotide binding protein (G protein), alpha activating activity polypeptide, olfactory type	GNAL	2774	213924_at	-0.827737	1.72805	-0.588891	2.58626	-1.07986	6.95569	83.2779	2.28025e-07	4.06965e-05
AW025141	shroom family member 3	SHROOM3	57619	228400_at	-1.06836	2.13596	-0.890192	2.34411	-0.612904	6.85961	83.0351	2.3102e-07	4.09633e-05
AA933717	piwi-like 2 (Drosophila)	PIWIL2	55124	239303_at	-0.568222	0.652077	0.165244	3.39101	-2.01997	6.11455	82.6827	2.35455e-07	4.16145e-05
AF131749	seizure related 6 homolog (mouse)-like 2	SEZ6L2	26470	233337_s_at	0.783519	1.29605	-0.436415	1.40334	-1.86015	7.00676	82.4524	2.3841e-07	4.20008e-05
BF062139	polymerase (RNA) III (DNA directed) polypeptide G (32kD)	POLR3G	10622	206653_at	-2.43753	2.5564	-1.41691	2.35534	0.959781	6.30184	81.7193	2.48118e-07	4.32922e-05
AI810054	DEP domain containing 1	DEPDC1	55635	235545_at	-1.96689	0.942704	-2.22005	2.73522	1.30921	7.38633	81.1676	2.55743e-07	4.43393e-05
NM_004973	jumonji, AT rich interactive domain 2	JARID2	3720	203298_s_at	-0.537397	3.41077	-0.724659	1.44252	-1.0781	9.33331	81.0917	2.56814e-07	4.43841e-05
AA524029	family with sequence similarity 189, member A2	FAM189A2	9413	213900_at	-0.455012	0.968238	-0.18278	2.04219	-1.10734	5.94366	80.9747	2.58476e-07	4.45241e-05
AI129310	chromosome 13 open reading frame 18	C13orf18	80183	44790_s_at	-0.718197	1.81428	-0.576788	2.06269	-0.877162	4.19946	80.9202	2.59255e-07	4.45241e-05
AI971694	RNA binding motif protein, X-linked-like 1	RBMXL1	494115	227748_at	-1.17527	1.55957	-1.34649	0.572174	1.17162	7.27992	80.7668	2.61462e-07	4.47624e-05
AF001294	pleckstrin homology-like domain, family A, member 2	PHLDA2	7262	209803_s_at	0.0811827	2.84754	-0.432086	2.69287	-2.53756	6.88825	80.3352	2.67796e-07	4.56033e-05
AA045257	Pentatricopeptide repeat domain 3	PTCD3	55037	228590_at	-1.97433	0.77716	-0.488332	1.82145	0.826533	7.34385	80.2702	2.68765e-07	4.56033e-05
AA642341	G2/M-phase specific E3 ubiquitin protein ligase	G2E3	55632	223255_at	-1.45974	0.922159	-0.962367	0.979932	1.14065	7.60475	80.2626	2.68879e-07	4.56033e-05
NM_014618	deleted in bladder cancer 1	DBC1	1620	205818_at	-0.270153	1.6845	0.178523	1.81041	-1.6173	5.90805	80.1503	2.70565e-07	4.56149e-05
AF268615	POU class 5 homeobox 1B	POU5F1B	5462	214532_x_at	-1.01792	2.03751	-0.866335	3.17787	-1.20227	7.99566	80.1469	2.70617e-07	4.56149e-05
AF394735	MAD2 mitotic arrest deficient-like 1 (yeast)	MAD2L1	4085	1554768_a_at	-1.6229	-1.41764	-2.55516	1.96087	2.49164	7.90065	79.2185	2.85069e-07	4.73539e-05
NM_006636	methylenetetrahydrofolate dehydrogenase (NADP+ dependent) 2, methenyltetrahydrofolate cyclohydrolase	MTHFD2	10797	201761_at	-1.44687	1.24464	-2.00829	1.53681	1.34631	10.6725	79.1254	2.8657e-07	4.73539e-05
AI703476	G protein-coupled receptor 27	GPR27	2850	227769_at	-1.20862	2.4472	-0.333583	3.95833	-2.02361	5.89026	79.0666	2.87524e-07	4.73539e-05
AI266750	---	---		237169_at	-0.535577	-0.553083	-0.406972	2.46222	-0.650228	4.27284	78.8915	2.90383e-07	4.75796e-05
AK025271	---	---		216170_at	-0.614946	0.931399	-0.604915	2.18186	-0.746817	4.71913	78.8549	2.90986e-07	4.75796e-05
AW237089	hypothetical protein LOC253842 /// nuclear receptor subfamily 6, group A, member 1	LOC253842 /// NR6A1		228894_at	-1.23176	1.82295	-0.677088	2.87489	-0.841092	7.30275	78.5326	2.96353e-07	4.78934e-05
AK025298	autism susceptibility candidate 2	AUTS2	26053	212599_at	-2.19114	1.65028	-1.2205	1.96316	1.14594	8.59282	78.2682	3.00849e-07	4.80886e-05
AA760738	---	---		229483_at	-0.536675	1.46776	-0.474727	2.30685	-1.17399	5.7465	78.2478	3.01199e-07	4.80886e-05
NM_000161	GTP cyclohydrolase 1	GCH1	2643	204224_s_at	-1.93463	2.03073	-1.76743	1.87467	1.18623	6.77183	78.2035	3.01961e-07	4.80886e-05
BC006428	CXXC finger protein 5	CXXC5	51523	224516_s_at	1.16595	0.712811	0.218058	1.41458	-2.49198	8.59249	78.1999	3.02023e-07	4.80886e-05
AI761824	zinc finger protein 398	ZNF398	57541	226202_at	-1.23205	1.10945	-1.62911	3.3199	-0.264955	7.45969	78.0046	3.05412e-07	4.84868e-05
AW299520	imprinted in Prader-Willi syndrome (non-protein coding)	IPW	3653	241834_at	-1.40074	2.37108	-1.60529	2.25694	0.175942	5.83072	77.8146	3.08754e-07	4.88203e-05
BE464819	---	---		239231_at	-1.70241	2.29011	-1.25435	2.68152	-0.0124055	6.90861	77.7838	3.093e-07	4.88203e-05
NM_005012	receptor tyrosine kinase-like orphan receptor 1	ROR1	4919	205805_s_at	-0.30217	2.011	0.476662	1.79478	-1.88246	6.561	77.6397	3.11871e-07	4.89291e-05
AI809108	nudix (nucleoside diphosphate linked moiety X)-type motif 16	NUDT16	131870	228341_at	-1.2745	0.44525	-1.18455	1.32974	1.02929	5.53832	77.5948	3.12678e-07	4.89291e-05
AI634411	---	---		230785_at	-0.695581	1.7752	-0.707904	2.50261	-1.09262	5.36965	77.5439	3.13593e-07	4.89321e-05
NM_004856	kinesin family member 23	KIF23	9493	204709_s_at	-2.65605	1.84987	-1.95579	2.88348	1.42097	6.96047	77.346	3.1719e-07	4.93524e-05
AI625235	non-protein coding RNA 275	NCRNA00275	441951	229899_s_at	-1.21405	2.54493	-1.45136	1.17607	0.549275	6.67349	77.285	3.18307e-07	4.93856e-05
AL537395	junctophilin 3	JPH3	57338	229294_at	-0.467318	1.59885	-0.611924	2.62827	-1.40986	5.13053	76.9341	3.24836e-07	5.00478e-05
BE503640	CUGBP, Elav-like family member 5	CELF5	60680	230497_at	-0.386615	2.57181	-0.293089	1.97658	-1.59298	6.2167	76.9082	3.25325e-07	5.00478e-05
AK026487	G kinase anchoring protein 1	GKAP1	80318	234192_s_at	-1.74887	-0.468511	-0.131872	2.20073	0.525805	6.6823	76.677	3.29724e-07	5.04477e-05
NM_031218	zinc finger protein 93	ZNF93	81931	208119_s_at	-1.01993	1.95061	-0.12313	2.16026	-0.988353	7.00526	76.6608	3.30033e-07	5.04477e-05
NM_004270	mediator complex subunit 7	MED7	9443	204350_s_at	0.437261	0.333203	-2.44919	-0.0647942	1.12766	7.72518	76.3658	3.35758e-07	5.07943e-05
AK090649	---	---		1566084_at	-1.07027	2.12	-1.50287	2.34561	-0.198228	5.58895	76.234	3.38355e-07	5.09812e-05
AI332764	family with sequence similarity 119, member A	FAM119A	151194	235931_at	-1.59921	0.245408	-1.81697	1.47055	1.74836	7.27768	76.0717	3.41586e-07	5.12366e-05
AI802048	unc-5 homolog D (C. elegans)	UNC5D	137970	231325_at	-1.53536	4.01872	0.572146	1.8308	-1.40618	6.18957	76.0294	3.42434e-07	5.12366e-05
N51468	non-protein coding RNA 292	NCRNA00292	642946	235126_at	-1.3867	1.69319	-0.736549	1.95111	0.0125915	7.6807	75.9676	3.43678e-07	5.12823e-05
U90902	T-cell lymphoma invasion and metastasis 1	TIAM1	7074	213135_at	-0.441192	2.25065	0.0167229	2.47719	-1.97164	7.18475	75.778	3.47529e-07	5.1575e-05
AI823766	cyclin-dependent kinase 12	CDK12	51755	225694_at	-1.20456	1.06791	-1.43597	0.985462	1.14893	7.47923	75.6905	3.49324e-07	5.15853e-05
AA824298	Zwilch, kinetochore associated, homolog (Drosophila)	ZWILCH	55055	222606_at	-1.93893	2.16907	-0.521092	1.61196	0.488661	9.00525	75.6826	3.49488e-07	5.15853e-05
M55905	malic enzyme 2, NAD(+)-dependent, mitochondrial	ME2	4200	210154_at	-1.39788	-0.511527	-2.37043	0.521467	2.80104	7.21586	75.1657	3.6033e-07	5.28998e-05
AK024285	spermatid perinuclear RNA binding protein	STRBP	55342	223245_at	-1.77203	1.60823	-1.02887	2.17575	0.471362	7.97151	74.88	3.66501e-07	5.36614e-05
AL833487	Zinc finger protein 578	ZNF578	147660	1562245_a_at	-0.435498	3.12079	-0.540598	0.857744	-0.816196	4.08515	74.3928	3.77318e-07	5.4685e-05
AI190287	zinc finger family member 788	ZNF788	388507	244552_at	-0.879194	2.82302	-0.59309	2.50291	-1.33503	5.42817	74.3904	3.77372e-07	5.4685e-05
AA833830	BEN domain containing 4	BEND4	389206	230896_at	-1.192	3.57105	-0.624304	2.93825	-1.54098	5.59441	74.3849	3.77497e-07	5.4685e-05
AW272422	mannosidase, endo-alpha-like	MANEAL	149175	226132_s_at	-0.39461	0.252389	-0.471368	2.62522	-1.12542	5.38749	74.3046	3.79318e-07	5.47474e-05
AI636647	forkhead box H1	FOXH1	8928	231407_s_at	-0.77507	2.9662	-0.566795	1.99798	-1.16779	7.0957	74.2776	3.79933e-07	5.47474e-05
AW451711	---	---		217617_at	-0.266176	1.89824	0.487502	1.56393	-1.73419	6.45568	74.1689	3.82421e-07	5.4961e-05
AW450929	hypothetical LOC100506653	LOC100506653	100506653	221919_at	-2.05002	0.965996	-0.830505	1.79722	1.08354	7.27627	73.946	3.87585e-07	5.54114e-05
NM_007019	ubiquitin-conjugating enzyme E2C	UBE2C	11065	202954_at	-1.95414	1.04425	-1.326	2.6015	0.755719	9.93671	73.8696	3.89374e-07	5.54416e-05
NM_012321	LSM4 homolog, U6 small nuclear RNA associated (S. cerevisiae)	LSM4	25804	202737_s_at	-1.90498	1.09369	-0.734138	1.23671	1.20537	9.67108	73.8504	3.89826e-07	5.54416e-05
NM_012105	beta-site APP-cleaving enzyme 2	BACE2	25825	217867_x_at	1.07542	-0.34905	0.107292	1.86541	-2.2742	7.46717	73.7602	3.91953e-07	5.55993e-05
AF183569	endoplasmic reticulum aminopeptidase 1	ERAP1	51752	209788_s_at	-0.937637	-0.492672	-1.47707	1.04529	1.38972	6.62204	73.5183	3.97732e-07	5.58321e-05
AW272333	---	---		227600_at	-1.48905	1.59865	-0.953793	0.416311	1.31448	6.32381	73.4743	3.98794e-07	5.58321e-05
AA603590	zinc finger protein 682	ZNF682	91120	242915_at	-1.60832	4.80351	0.369457	2.05517	-1.60927	6.5124	73.4262	3.99959e-07	5.58321e-05
U85995	Bardet-Biedl syndrome 9	BBS9	27241	37547_at	-0.88083	3.60882	-0.543691	0.898558	-0.558688	5.70986	73.3794	4.01097e-07	5.58321e-05
NM_016220	zinc finger protein 107	ZNF107	51427	205739_x_at	-1.84292	1.63037	-1.39737	1.97394	0.915083	6.59865	73.366	4.01422e-07	5.58321e-05
AF182069	prokineticin 2	PROK2	60675	232629_at	-0.723191	0.740874	-0.620252	2.31805	-0.655629	4.45007	73.2754	4.03638e-07	5.58321e-05
AI821565	non-protein coding RNA 173	NCRNA00173	100287569	237591_at	-0.563517	3.01647	-0.611613	1.74065	-1.19466	6.15217	73.2681	4.03817e-07	5.58321e-05
AI753488	glutamate-cysteine ligase, modifier subunit	GCLM	2730	236140_at	-1.23295	-0.551307	-1.82276	1.00509	1.96183	6.08988	73.1389	4.07005e-07	5.60371e-05
AK022793	---	---		233142_at	-0.581021	-0.0445974	-0.317732	2.39902	-0.79164	5.30206	73.0918	4.08175e-07	5.60371e-05
NM_005052	ras-related C3 botulinum toxin substrate 3 (rho family, small GTP binding protein Rac3)	RAC3	5881	206103_at	-1.03953	-1.27929	-1.72267	0.175913	2.49713	7.18643	73.0836	4.08378e-07	5.60371e-05
BC016767	---	---		1554599_x_at	-1.14386	0.541728	-1.29574	1.8201	0.613705	7.54861	72.8609	4.13966e-07	5.62655e-05
AA905508	spermatogenesis associated 17	SPATA17	128153	230763_at	-0.491194	-0.692772	-0.737338	2.99292	-0.7816	4.84058	72.8531	4.14164e-07	5.62655e-05
BE930512	Mdm2 p53 binding protein homolog (mouse)	MDM2	4193	217542_at	-1.15854	1.5339	-0.949255	0.102463	1.21176	6.33285	72.5187	4.22737e-07	5.70047e-05
AU146709	SERTA domain containing 4	SERTAD4	56256	230660_at	0.376138	-0.456022	-0.419088	2.15999	-1.38473	5.78507	72.3048	4.28336e-07	5.74039e-05
AI990790	---	---		237483_at	-0.49643	2.11313	-0.376707	2.72745	-1.77511	6.37736	72.2662	4.29354e-07	5.74039e-05
AI753792	related RAS viral (r-ras) oncogene homolog 2	RRAS2	22800	212589_at	-1.49435	2.17111	-0.588155	1.25399	0.326755	9.62446	72.2503	4.29776e-07	5.74039e-05
NM_006784	WD repeat domain 3	WDR3	10885	218882_s_at	-1.88091	0.539706	-1.04858	1.37627	1.48255	9.04321	72.2059	4.30952e-07	5.74039e-05
BQ446762	---	---		1557238_s_at	-0.942661	2.13974	-0.663866	1.8171	-0.539404	4.66601	72.0871	4.34123e-07	5.76028e-05
R41498	leucine rich repeat containing 8 family, member B	LRRC8B	23507	212976_at	-1.33124	0.694268	-1.23966	1.04549	1.22926	5.8193	71.9812	4.36975e-07	5.76028e-05
AA725246	---	---		231311_at	-1.6314	-0.386632	-1.03188	1.27359	1.59913	5.5718	71.9781	4.37059e-07	5.76028e-05
AF225416	SPC25, NDC80 kinetochore complex component, homolog (S. cerevisiae)	SPC25	57405	209891_at	-2.23	0.971201	-1.8657	2.48481	1.49352	6.55308	71.926	4.38468e-07	5.76028e-05
BG054916	patched 1	PTCH1	5727	209815_at	-1.78445	0.75608	-1.03877	3.12674	0.140447	8.14477	71.9242	4.38519e-07	5.76028e-05
D32051	phosphoribosylglycinamide formyltransferase, phosphoribosylglycinamide synthetase, phosphoribosylaminoimidazole synthetase	GART	2618	210005_at	-2.29526	1.1942	-1.17506	1.72749	1.5289	6.63842	71.8833	4.39629e-07	5.76028e-05
NM_030577	transmembrane protein 177	TMEM177	80775	218897_at	-1.73006	1.1873	-1.32314	1.38881	1.29051	7.23441	71.738	4.43609e-07	5.76028e-05
BE677308	zinc finger, X-linked, duplicated B	ZXDB	158586	228005_at	-1.41454	-0.206792	-0.791563	1.27156	1.16348	7.3034	71.7289	4.43857e-07	5.76028e-05
N64622	ERI1 exoribonuclease family member 2	ERI2	112479	213365_at	-1.33938	0.749445	-1.0563	0.46001	1.48709	7.38873	71.709	4.44408e-07	5.76028e-05
AJ006835	small nucleolar RNA host gene 3 (non-protein coding)	SNHG3	8420	215011_at	-1.42314	1.39171	-1.59714	2.05568	0.653545	6.47314	71.6985	4.44698e-07	5.76028e-05
AU145411	fibroblast growth factor receptor 1	FGFR1	2260	222164_at	-1.22116	0.563339	-0.101374	2.92504	-0.849062	6.99286	71.5244	4.49536e-07	5.76028e-05
BE622627	phosphoinositide-3-kinase, regulatory subunit 3 (gamma)	PIK3R3	8503	202743_at	-1.84763	-0.679644	-1.13937	0.732888	2.34516	7.57543	71.4616	4.51297e-07	5.76028e-05
AI431643	related RAS viral (r-ras) oncogene homolog 2	RRAS2	22800	212590_at	-1.63136	1.72153	-1.89862	1.5361	1.2992	8.49385	71.4519	4.51569e-07	5.76028e-05
AF136972	protein phosphatase, Mg2+/Mn2+ dependent, 1B	PPM1B	5495	209296_at	-1.34905	2.74741	-1.31724	1.98674	-0.0130884	8.96491	71.4167	4.5256e-07	5.76028e-05
AF336127	solute carrier family 4, sodium borate transporter, member 11	SLC4A11	83959	223748_at	-2.21798	1.97549	-0.748922	1.44006	1.09872	7.80903	71.4008	4.53008e-07	5.76028e-05
BF675750	phosphodiesterase 12	PDE12	201626	231839_at	-1.2962	0.626164	-0.874087	0.810642	1.12977	8.29595	71.3481	4.545e-07	5.76028e-05
N90719	---	---		242245_at	-2.01952	0.897898	-1.10661	1.9571	1.15322	6.0575	71.301	4.55837e-07	5.76028e-05
AB040906	zinc finger protein 492	ZNF492	57615	215532_x_at	-0.930104	-0.515206	-0.562332	3.54639	-0.887536	4.68645	71.2606	4.5699e-07	5.76028e-05
NM_014211	gamma-aminobutyric acid (GABA) A receptor, pi	GABRP	2568	205044_at	-0.807577	1.59148	0.0700429	2.2155	-1.24661	5.2856	71.2068	4.58527e-07	5.76028e-05
BC001052	RecQ protein-like (DNA helicase Q1-like)	RECQL	5965	210568_s_at	-1.10873	0.594373	-1.68691	1.8589	0.795943	7.06515	71.2	4.58722e-07	5.76028e-05
NM_020183	aryl hydrocarbon receptor nuclear translocator-like 2	ARNTL2	56938	220658_s_at	-1.38365	-0.471871	-1.39335	1.92838	1.18426	5.91041	71.1818	4.59244e-07	5.76028e-05
R46180	glycerophosphodiester phosphodiesterase domain containing 1	GDPD1	284161	238681_at	-1.2176	0.0236901	-1.25864	0.642141	1.6207	5.90934	71.1709	4.59558e-07	5.76028e-05
D89976	5-aminoimidazole-4-carboxamide ribonucleotide formyltransferase/IMP cyclohydrolase	ATIC	471	208758_at	-1.55267	0.546732	-1.22506	1.73112	1.03306	10.2305	71.1627	4.59795e-07	5.76028e-05
BC037816	---	---		1562828_at	-1.27802	3.45039	0.610307	2.18882	-1.73819	5.53941	71.1601	4.59869e-07	5.76028e-05
AW009436	Chromosome 1 open reading frame 104	C1orf104	284618	230256_at	-1.5692	-0.0405526	-1.25187	2.30796	0.878659	6.53656	71.095	4.61745e-07	5.77055e-05
AI672489	core 1 synthase, glycoprotein-N-acetylgalactosamine 3-beta-galactosyltransferase, 1	C1GALT1	56913	226105_at	-1.19167	1.48704	-1.64817	1.44627	0.830587	7.27972	70.8417	4.69139e-07	5.819e-05
AK026259	---	---		234649_at	-0.498136	1.91691	-0.827966	2.41238	-1.19711	5.10057	70.8155	4.6991e-07	5.819e-05
AW205632	---	---		238156_at	-1.76372	2.25075	-0.256353	1.50764	0.179282	7.69626	70.7905	4.70649e-07	5.819e-05
AF059752	mannose-P-dolichol utilization defect 1	MPDU1	9526	209208_at	-0.494802	-2.22574	-2.01895	0.61539	2.17242	7.53982	70.1112	4.91279e-07	5.99078e-05
NM_006295	valyl-tRNA synthetase	VARS	7407	201797_s_at	-1.16902	0.639512	-1.55399	0.400136	1.72509	7.96801	70.1056	4.91452e-07	5.99078e-05
NM_003158	aurora kinase A	AURKA	6790	208079_s_at	-2.41715	1.61625	-0.516025	2.14566	0.791976	9.10724	70.0711	4.92531e-07	5.99078e-05
AI636080	mucolipin 3	MCOLN3	55283	229797_at	-0.85755	1.82552	-0.422823	2.4032	-1.0712	4.74236	69.8295	5.00156e-07	6.05654e-05
AW873348	quiescin Q6 sulfhydryl oxidase 2	QSOX2	169714	227146_at	-0.995023	0.513323	-1.16332	1.15029	0.832607	8.61662	69.365	5.1522e-07	6.19034e-05
AF274950	chromosome 12 open reading frame 11	C12orf11	55726	221652_s_at	-1.49169	1.07804	-1.96036	1.78954	1.24622	9.73468	69.3635	5.1527e-07	6.19034e-05
NM_021728	orthodenticle homeobox 2	OTX2	5015	231731_at	-0.464732	-0.0148922	-0.808881	2.28798	-0.516374	4.40694	69.3494	5.15739e-07	6.19034e-05
NM_005057	retinoblastoma binding protein 5	RBBP5	5929	205169_at	-0.944221	-0.865907	-1.54521	1.56893	1.21705	6.79199	69.2335	5.19586e-07	6.21426e-05
BC002508	acetylserotonin O-methyltransferase-like	ASMTL	8623	209394_at	-0.468741	2.4344	-0.640762	1.6651	-1.02562	7.94937	69.1508	5.22355e-07	6.21426e-05
NM_012410	seizure related 6 homolog (mouse)-like 2	SEZ6L2	26470	218720_x_at	0.535312	1.58715	-0.33935	0.990155	-1.49823	6.70617	69.0814	5.24693e-07	6.21426e-05
AB005289	ATP-binding cassette, sub-family B (MDR/TAP), member 7	ABCB7	22	209620_s_at	-1.32109	0.473755	-1.10023	1.8331	0.674585	8.42573	69.0517	5.25697e-07	6.21426e-05
AI963203	solute carrier family 7 (cationic amino acid transporter, y+ system), member 3	SLC7A3	84889	230597_at	-2.1978	4.41709	-0.275929	3.60484	-1.49384	8.28262	68.8194	5.33631e-07	6.29287e-05
NM_003384	vaccinia related kinase 1	VRK1	7443	203856_at	-2.67152	1.65641	-1.23752	1.66631	1.83352	8.05937	68.7701	5.35335e-07	6.29287e-05
NM_002349	lymphocyte antigen 75	LY75	4065	205668_at	-0.493944	1.71062	-0.735891	1.6878	-0.710869	4.28085	68.7565	5.35804e-07	6.29287e-05
AL522406	chromosome 13 open reading frame 23	C13orf23	80209	225887_at	-2.14457	1.75315	-2.53835	2.8439	1.35649	7.67567	68.6955	5.37923e-07	6.3042e-05
AI571166	---	---		226848_at	-1.78917	0.981682	-0.0754173	1.14407	0.74951	7.05453	68.4057	5.48128e-07	6.39635e-05
AI825937	echinoderm microtubule associated protein like 1	EML1	2009	204796_at	-1.30898	0.96748	-1.11065	0.630026	1.3069	5.71847	68.3143	5.51395e-07	6.4071e-05
AK024960	Spermatid perinuclear RNA binding protein	STRBP	55342	233251_at	-0.780821	1.53303	-0.607753	2.40762	-0.930099	4.56455	68.251	5.5367e-07	6.41987e-05
BC015866	---	---		1555461_at	-1.60781	-0.12833	-1.00964	0.461974	2.0157	6.27814	68.1998	5.55518e-07	6.42765e-05
AJ130971	small nuclear ribonucleoprotein polypeptide A'	SNRPA1	6627	215722_s_at	-1.01035	0.987426	-1.58723	1.19892	0.940087	8.21634	68.0841	5.59728e-07	6.45519e-05
BC030758	chromosome 22 open reading frame 39	C22orf39	128977	1553974_at	-1.86253	-0.589822	-0.645235	1.23613	1.66521	6.56831	68.0695	5.60262e-07	6.45519e-05
BF591615	---	---		231502_at	-0.818026	2.02609	-0.900848	1.99043	-0.583724	4.33926	67.9531	5.64539e-07	6.48001e-05
BF057073	---	---		231310_at	-2.1554	5.11101	0.954382	4.60485	-3.25443	8.14688	67.8712	5.67573e-07	6.4935e-05
AU153330	activating signal cointegrator 1 complex subunit 3	ASCC3	10973	231269_at	-1.65292	2.79376	-2.11229	0.942221	1.50172	6.54632	67.8349	5.68921e-07	6.4935e-05
NM_024880	---	---		206548_at	-0.739845	3.49635	-0.0577098	1.3561	-1.2912	5.38912	67.8185	5.69532e-07	6.4935e-05
AI291720	DPH5 homolog (S. cerevisiae)	DPH5	51611	222360_at	-1.57242	1.7706	-1.30086	1.35886	0.94356	6.17503	67.7453	5.72274e-07	6.49818e-05
BE350312	---	---		242008_at	-1.47977	2.95081	-0.87513	3.1085	-0.992742	5.7288	67.744	5.72322e-07	6.49818e-05
AI754871	spermatogenesis associated 5	SPATA5	166378	229075_at	-1.73817	1.83232	-1.7735	0.868605	1.73066	5.74511	67.6218	5.76932e-07	6.51099e-05
NM_006208	ectonucleotide pyrophosphatase/phosphodiesterase 1	ENPP1	5167	205066_s_at	-1.07921	3.34695	-0.449602	1.31859	-0.615762	7.01728	67.6193	5.77028e-07	6.51099e-05
AK094613	Ribosomal protein S24	RPS24	6229	1555878_at	-2.02238	2.85065	-2.0611	1.51701	1.43489	6.99757	67.3024	5.89195e-07	6.58031e-05
AF303588	opsin 3	OPN3	23596	224392_s_at	-1.13176	-1.08517	-0.751549	2.52127	0.313668	7.04962	67.2668	5.90582e-07	6.58234e-05
AL603301	MDN1, midasin homolog (yeast)	MDN1	23195	1569484_s_at	-1.59289	2.67733	-0.720286	2.28626	-0.343538	5.39671	67.0643	5.98542e-07	6.63633e-05
BC034978	phosphodiesterase 12	PDE12	201626	1554915_a_at	-1.34488	0.131906	-1.37415	0.625014	1.80033	5.05414	67.051	5.99071e-07	6.63633e-05
AU132789	zinc finger protein 273	ZNF273	10793	215239_x_at	-1.6595	1.78	-1.41399	2.27854	0.489802	6.11919	67.0164	6.00443e-07	6.63806e-05
BE219444	general transcription factor IIA, 2, 12kDa	GTF2A2	2958	243985_at	-0.779355	1.78412	-0.553318	1.52389	-0.462403	5.16726	66.9266	6.04032e-07	6.65223e-05
R52023	---	---		235027_at	-0.902213	-1.7734	-0.304955	2.07363	0.31423	5.60903	66.8813	6.05852e-07	6.65742e-05
AF193855	Zic family member 2 (odd-paired homolog, Drosophila)	ZIC2	7546	223642_at	-1.56201	2.45333	-1.63969	4.902	-1.43064	5.24596	66.7994	6.09158e-07	6.68031e-05
NM_021242	MID1 interacting protein 1 (gastrulation specific G12 homolog (zebrafish))	MID1IP1	58526	218251_at	-1.13479	0.537875	-1.15093	0.869556	1.14308	7.41859	66.7624	6.10658e-07	6.68334e-05
BC016785	zinc finger protein 826, pseudogene	ZNF826P	664701	1569191_at	-0.706738	2.41267	-0.818	2.29592	-1.08277	4.4976	66.5915	6.17647e-07	6.74631e-05
AI950472	---	---		237275_at	-0.638617	4.5755	-0.529861	1.41895	-1.47928	5.6787	66.5148	6.20814e-07	6.76737e-05
NM_020990	creatine kinase, mitochondrial 1A /// creatine kinase, mitochondrial 1B	CKMT1A /// CKMT1B		202712_s_at	-0.738099	2.64586	-0.150297	2.14519	-1.47379	5.95383	66.3988	6.25647e-07	6.79293e-05
AI081356	LAG1 homolog, ceramide synthase 6	LASS6	253782	235463_s_at	-1.00556	0.737975	-1.23414	0.230976	1.42834	6.04103	66.3438	6.27952e-07	6.80047e-05
AB032977	neuron navigator 1	NAV1	89796	224772_at	0.927276	0.333456	0.608387	1.74393	-2.60664	6.91142	66.3229	6.28832e-07	6.80047e-05
AA001400	frizzled homolog 3 (Drosophila)	FZD3	7976	227499_at	-1.113	1.38639	-0.901321	1.81007	0.0450416	6.22701	66.2845	6.30453e-07	6.80453e-05
BF540749	transmembrane 7 superfamily member 3	TM7SF3	51768	226478_at	-1.74669	0.879768	-2.33097	2.32711	1.456	7.05564	66.0827	6.39041e-07	6.86946e-05
AI967971	polyribonucleotide nucleotidyltransferase 1	PNPT1	87178	225291_at	-2.22274	1.30418	-1.69922	1.51974	1.90767	8.6936	66.0548	6.40243e-07	6.86946e-05
AI867102	nucleoporin 210kDa	NUP210	23225	213947_s_at	-1.88047	0.52448	-0.96301	1.40774	1.40915	8.15341	66.0231	6.4161e-07	6.87063e-05
NM_006773	DEAD (Asp-Glu-Ala-Asp) box polypeptide 18	DDX18	8886	205763_s_at	-0.886176	1.10615	-2.17488	1.25468	1.13093	7.4894	65.7461	6.53692e-07	6.97024e-05
AW195586	ADAM metallopeptidase domain 1, pseudogene	ADAM1	8759	228925_at	-1.78469	2.30956	-1.3274	1.38358	0.977386	5.61986	65.6498	6.57961e-07	6.9823e-05
NM_018119	polymerase (RNA) III (DNA directed) polypeptide E (80kD)	POLR3E	55718	218016_s_at	-1.58816	0.664917	-1.29545	1.61895	1.15085	8.29393	65.415	6.68506e-07	7.06173e-05
BC041466	---	---		1564154_at	-0.364406	1.8904	-0.431515	2.48966	-1.63783	6.59976	65.323	6.72696e-07	7.07883e-05
AU144571	RNA binding motif protein 26	RBM26	64062	229433_at	-0.561364	0.423489	-1.62852	0.975209	0.855743	6.27154	65.094	6.8326e-07	7.1076e-05
NM_020143	partner of NOB1 homolog (S. cerevisiae)	PNO1	56902	203622_s_at	-1.36663	0.115837	-1.88163	0.907945	1.97714	8.14446	65.0554	6.8506e-07	7.10993e-05
BC004490	FBJ murine osteosarcoma viral oncogene homolog	FOS	2353	209189_at	0.67141	-1.15206	0.537505	2.35017	-2.2125	6.65375	65.0334	6.86088e-07	7.10993e-05
BC005954	NADH dehydrogenase (ubiquinone) Fe-S protein 7, 20kDa (NADH-coenzyme Q reductase)	NDUFS7	374291	211752_s_at	-0.376352	-0.48213	-1.63372	0.952204	0.991409	9.25006	64.8137	6.96465e-07	7.19018e-05
AI743596	tetraspanin 2	TSPAN2	10100	227236_at	-0.251148	2.55369	-0.487084	1.80133	-1.47624	5.38742	64.6852	7.02624e-07	7.22644e-05
BE221674	immunoglobulin superfamily, member 11	IGSF11	152404	228375_at	-1.05823	-0.103453	-0.880743	2.36841	0.100942	5.51881	64.6409	7.04765e-07	7.23484e-05
NM_021614	potassium intermediate/small conductance calcium-activated channel, subfamily N, member 2	KCNN2	3781	220116_at	-0.958815	3.04339	-0.403656	1.93065	-1.07364	5.34687	64.4507	7.14039e-07	7.25831e-05
NM_001963	epidermal growth factor	EGF	1950	206254_at	-0.556938	0.927211	-1.03335	2.47846	-0.715535	4.90258	64.3902	7.17019e-07	7.25831e-05
AA404996	---	---		244633_at	-0.625832	2.29313	-0.435352	1.54702	-0.879657	5.90873	64.3439	7.19306e-07	7.25831e-05
NM_006170	NOP2 nucleolar protein homolog (yeast)	NOP2	4839	214427_at	-1.60877	0.0848853	-0.166266	1.70716	0.553212	8.21133	64.3365	7.19677e-07	7.25831e-05
AF279773	Hypothetical protein LOC349160	LOC349160	349160	233934_at	-0.476878	-0.323963	-0.346386	2.35841	-0.756487	4.29803	64.3135	7.20816e-07	7.25831e-05
NM_018126	transmembrane protein 33	TMEM33	55161	218465_at	-1.46411	1.48913	-1.85933	0.474097	1.89122	7.57535	64.2963	7.21671e-07	7.25831e-05
BC030211	---	---		1568780_at	-1.85896	3.63172	-1.15784	2.73911	-0.405792	6.72295	64.2086	7.26053e-07	7.27558e-05
AI457120	phosphoribosyl pyrophosphate amidotransferase	PPAT	5471	209433_s_at	-2.03691	1.61329	-1.23062	1.69307	1.19085	8.83763	64.1355	7.29734e-07	7.28294e-05
BF511884	---	---		241776_at	-0.936591	3.0463	-0.556269	2.04347	-1.07031	5.31987	64.1293	7.30042e-07	7.28294e-05
AL044326	phosphoribosylformylglycinamidine synthase	PFAS	5198	213302_at	-2.78312	1.77757	-0.824935	0.76459	2.23082	8.19102	64.1146	7.30788e-07	7.28294e-05
AB023420	heat shock 70kDa protein 4	HSPA4	3308	208815_x_at	-1.26126	1.41217	-1.04911	1.09384	0.760713	9.71128	63.4781	7.63842e-07	7.50359e-05
N51263	alkaline ceramidase 3	ACER3	55331	222689_at	-1.22859	0.653976	-1.16523	0.550319	1.42054	6.07656	63.4766	7.6392e-07	7.50359e-05
NM_018057	solute carrier family 6 (neutral amino acid transporter), member 15	SLC6A15	55117	206376_at	-1.37911	-0.899427	-1.88657	-0.506216	3.27411	6.62325	63.3787	7.69163e-07	7.54152e-05
AW138134	PHD finger protein 17	PHF17	79960	225816_at	-1.8944	2.59757	-1.293	2.29781	0.358674	8.13861	63.2904	7.73936e-07	7.57472e-05
BC006164	---	---		211781_x_at	-0.698837	3.80802	-0.581065	1.8708	-1.43032	6.48133	63.2117	7.78216e-07	7.58941e-05
BC005004	family with sequence similarity 64, member A	FAM64A	54478	221591_s_at	-1.26801	1.48367	-1.02182	1.39108	0.527286	8.17041	63.158	7.81153e-07	7.60448e-05
AA074145	proline dehydrogenase (oxidase) 1	PRODH	5625	214203_s_at	-0.266674	2.95954	-0.63883	1.4574	-1.26556	7.75738	63.1273	7.82835e-07	7.60729e-05
BC003573	farnesyl-diphosphate farnesyltransferase 1	FDFT1	2222	210950_s_at	-0.883695	-0.175896	-2.38525	2.2967	1.00136	10.0792	63.0813	7.85368e-07	7.61835e-05
NM_031217	kinesin family member 18A	KIF18A	81930	221258_s_at	-1.22004	0.584408	-1.86349	1.52436	1.25133	6.37247	62.9736	7.91342e-07	7.66268e-05
AK093253	FLJ35934	FLJ35934	400579	1564383_s_at	-0.608198	1.35596	-0.00784414	2.33717	-1.39667	5.85539	62.9401	7.93209e-07	7.66717e-05
AI339426	small nucleolar RNA host gene 12 (non-protein coding)	SNHG12	85028	228990_at	-1.31923	0.954346	-2.12006	1.6764	1.29689	7.12654	62.774	8.02548e-07	7.68634e-05
AI669535	hypothetical protein LOC729680	LOC729680	729680	228977_at	-1.68714	-1.20112	-1.59325	1.46151	2.17535	6.93905	62.7234	8.05424e-07	7.68634e-05
NM_012254	solute carrier family 27 (fatty acid transporter), member 5	SLC27A5	10998	219733_s_at	-0.787316	-0.25938	-1.1514	0.0710954	1.59398	7.48806	62.6904	8.07303e-07	7.68634e-05
AL046017	family with sequence similarity 46, member C	FAM46C	54855	226811_at	-0.537855	-0.617994	0.784978	2.74351	-1.60847	6.11322	62.6129	8.11739e-07	7.70983e-05
AA156723	vesicle amine transport protein 1 homolog (T. californica)-like	VAT1L	57687	226415_at	-0.303927	2.10091	1.15417	2.19284	-2.62772	6.58918	62.5147	8.17404e-07	7.75015e-05
NM_020436	sal-like 4 (Drosophila)	SALL4	57167	229661_at	-1.06529	4.06169	-0.0908849	2.65741	-1.99963	7.83015	62.388	8.24788e-07	7.79297e-05
AI743740	La ribonucleoprotein domain family, member 4	LARP4	113251	214155_s_at	-2.13699	1.7881	-1.46261	1.38723	1.59121	5.90417	62.3864	8.24882e-07	7.79297e-05
NM_022346	non-SMC condensin I complex, subunit G	NCAPG	64151	218662_s_at	-2.73593	0.978664	-0.522732	2.2772	1.24006	8.16915	62.3639	8.262e-07	7.79297e-05
AF110400	fibroblast growth factor 19	FGF19	9965	223761_at	-0.355225	-0.523532	-0.645231	2.63994	-0.800074	5.60017	62.3156	8.2904e-07	7.80627e-05
Y15521	acetylserotonin O-methyltransferase-like	ASMTL	8623	36554_at	-0.446312	2.47154	-1.69688	2.22088	-0.726867	7.75159	62.2524	8.32777e-07	7.81055e-05
NM_022096	ankyrin repeat domain 5	ANKRD5	63926	220144_s_at	-0.682479	1.98818	-0.569142	1.00971	-0.27396	5.46008	62.2042	8.35637e-07	7.81055e-05
AU145049	huntingtin interacting protein 1	HIP1	3092	226364_at	-1.23063	1.72881	-1.25353	2.03911	0.130639	7.60033	62.1606	8.38237e-07	7.81055e-05
NM_001813	centromere protein E, 312kDa	CENPE	1062	205046_at	-1.69293	1.10139	-1.4988	1.46925	1.3455	7.54263	62.1566	8.38478e-07	7.81055e-05
AV699857	ribulose-5-phosphate-3-epimerase	RPE	6120	225039_at	-0.90565	0.608227	-2.00054	1.35765	1.1315	7.8104	62.1482	8.38979e-07	7.81055e-05
NM_004728	DEAD (Asp-Glu-Ala-Asp) box polypeptide 21	DDX21	9188	208152_s_at	-1.17836	1.64118	-1.76636	0.5585	1.43654	10.3621	62.1411	8.39404e-07	7.81055e-05
M65254	protein phosphatase 2, regulatory subunit A, beta	PPP2R1B	5519	202886_s_at	-0.729823	0.166113	-1.07711	-0.0219559	1.40717	6.24981	62.082	8.42948e-07	7.81055e-05
NM_019049	DENN/MADD domain containing 1B	DENND1B	163486	219696_at	-0.968912	-1.46274	-1.02139	0.930686	1.51696	6.55161	62.0795	8.43097e-07	7.81055e-05
AW193600	hypothetical LOC439949	LOC439949	439949	232001_at	-1.30704	2.37894	-0.9357	0.992449	0.476228	6.58019	62.0736	8.43454e-07	7.81055e-05
NM_017412	frizzled homolog 3 (Drosophila)	FZD3	7976	219683_at	-1.10562	0.599286	-1.41628	1.45113	0.882624	6.30143	61.9957	8.48157e-07	7.8367e-05
U21915	general transcription factor IIH, polypeptide 2B	GTF2H2B	653238	215470_at	-1.40956	0.381828	-1.18646	1.89159	0.812197	6.53187	61.9737	8.49491e-07	7.8367e-05
NM_004446	glutamyl-prolyl-tRNA synthetase	EPRS	2058	200843_s_at	-0.993733	0.740253	-1.40388	1.53154	0.661873	9.84291	61.8463	8.57269e-07	7.8947e-05
AI144007	heterogeneous nuclear ribonucleoprotein A1 /// hypothetical LOC100506653	HNRNPA1 /// LOC100506653		222040_at	-1.60492	0.612569	-0.43482	2.28819	0.165151	7.53009	61.807	8.59688e-07	7.8947e-05
AB011100	KIAA0528	KIAA0528	9847	212943_at	-1.76685	0.758251	-0.426031	2.1219	0.383525	9.35137	61.8001	8.60115e-07	7.8947e-05
AW006938	neurolysin (metallopeptidase M3 family)	NLN	57486	225944_at	-1.63567	2.69468	-1.40867	0.90884	1.07067	6.81455	61.6387	8.7013e-07	7.94655e-05
AI808395	NADH dehydrogenase (ubiquinone) Fe-S protein 1, 75kDa (NADH-coenzyme Q reductase)	NDUFS1	4719	236356_at	-1.52743	0.937391	-1.22863	0.565798	1.65685	6.26038	61.4716	8.8065e-07	8.02099e-05
AI421796	solute carrier family 10 (sodium/bile acid cotransporter family), member 4	SLC10A4	201780	239913_at	-0.521987	-0.248357	-0.521984	2.17564	-0.497663	4.0073	61.4627	8.81218e-07	8.02099e-05
AW292746	myosin regulatory light chain interacting protein	MYLIP	29116	228097_at	-0.425692	0.444802	-0.457386	1.88169	-0.672112	4.46379	61.3923	8.857e-07	8.03699e-05
AK022853	solute carrier family 6 (neutral amino acid transporter), member 15	SLC6A15	55117	232263_at	-1.64681	1.20404	-1.5198	1.21627	1.44782	6.24458	61.3889	8.85919e-07	8.03699e-05
AI014470	hypothetical LOC728485	LOC728485	728485	242070_at	-0.871923	1.24931	-0.209388	2.31277	-0.946767	5.84668	61.1879	8.98873e-07	8.13259e-05
NM_004280	eukaryotic translation elongation factor 1 epsilon 1	EEF1E1	9521	204905_s_at	-1.37768	0.74161	-2.17999	1.32467	1.70068	8.6697	61.1518	9.01229e-07	8.13259e-05
AK022964	HAUS augmin-like complex, subunit 6	HAUS6	54801	233655_s_at	-1.65726	0.387397	-1.78608	2.14923	1.28603	5.87425	61.1121	9.03823e-07	8.13259e-05
AI347136	telomeric repeat binding factor (NIMA-interacting) 1	TERF1	7013	203448_s_at	-2.08555	3.79579	-0.439345	1.59898	0.0472003	8.89054	61.1109	9.03903e-07	8.13259e-05
BG025248	patatin-like phospholipase domain containing 8	PNPLA8	50640	223309_x_at	-0.475729	-1.1674	-1.03542	0.0151778	1.54502	8.51171	61.0492	9.07952e-07	8.14371e-05
BF223023	hypothetical LOC790952	ESRG	790952	231381_at	-2.19643	5.62383	1.46634	4.82711	-3.87381	7.90733	61.0305	9.09185e-07	8.14371e-05
BG500611	Yip1 domain family, member 6	YIPF6	286451	212342_at	-0.712073	-0.115937	-1.68649	1.37671	0.957239	6.82454	61.005	9.10867e-07	8.14371e-05
BF214329	mitochondrial fission regulator 1	MTFR1	9650	203207_s_at	-1.37851	0.607247	-1.98952	1.62359	1.42005	7.00461	61.0014	9.11103e-07	8.14371e-05
M33653	collagen, type XIII, alpha 1	COL13A1	1305	211343_s_at	0.413132	2.213	0.0327796	1.78525	-2.36282	6.55057	60.9118	9.17055e-07	8.18352e-05
NM_018846	kelch-like 7 (Drosophila)	KLHL7	55975	220238_s_at	-1.7115	1.17465	-2.336	2.71602	1.06661	5.84436	60.837	9.22053e-07	8.2147e-05
U77949	cell division cycle 6 homolog (S. cerevisiae)	CDC6	990	203967_at	-1.86283	0.715046	-1.78036	1.59115	1.75062	5.89103	60.7159	9.30221e-07	8.26977e-05
W92748	sema domain, transmembrane domain (TM), and cytoplasmic domain, (semaphorin) 6A	SEMA6A	57556	225660_at	-1.63628	3.67148	0.312445	2.24142	-1.29012	8.98583	60.6783	9.32777e-07	8.26977e-05
N21426	synaptotagmin-like 2	SYTL2	54843	225496_s_at	-0.288125	0.36224	0.723038	1.78721	-1.50612	6.28951	60.6552	9.34345e-07	8.27024e-05
AA732995	---	---		216000_at	-0.459358	1.85433	-0.486849	1.51926	-0.847023	4.95271	60.6081	9.37563e-07	8.28529e-05
BC012484	GRB10 interacting GYF protein 2	GIGYF2	26058	1560133_at	-0.72611	1.61775	-0.544183	1.75451	-0.620022	4.04871	60.5741	9.39898e-07	8.29251e-05
NM_024622	FAST kinase domains 1	FASTKD1	79675	219002_at	-1.98501	1.38857	-0.405719	1.76	0.619301	8.83394	60.3164	9.578e-07	8.40724e-05
BC001811	RRS1 ribosome biogenesis regulator homolog (S. cerevisiae)	RRS1	23212	209567_at	-1.99456	0.840088	-0.782375	1.08043	1.51582	8.73346	60.3148	9.57906e-07	8.40724e-05
AA521262	chromosome 3 open reading frame 67	C3orf67	200844	239697_x_at	-0.577495	0.930876	-0.368948	2.19101	-0.947508	4.70138	60.2489	9.62557e-07	8.42438e-05
NM_024745	SHC SH2-domain binding protein 1	SHCBP1	79801	219493_at	-1.79602	0.768109	-1.70049	1.19279	1.87845	6.33872	60.1609	9.68799e-07	8.45387e-05
NM_018183	strawberry notch homolog 1 (Drosophila)	SBNO1	55206	218737_at	-1.16223	0.429809	-1.63527	1.65792	1.00385	6.50115	60.1578	9.69023e-07	8.45387e-05
T79568	regulation of nuclear pre-mRNA domain containing 1A	RPRD1A	55197	222558_at	-0.918381	0.00562418	-2.36828	1.15958	1.72231	6.22349	60.0691	9.75367e-07	8.47896e-05
AA757900	Farnesyl-diphosphate farnesyltransferase 1	FDFT1	2222	241954_at	-1.26936	2.49731	-0.748881	2.20357	-0.532867	6.48105	60.028	9.78322e-07	8.47896e-05
AA524609	---	---		1559410_at	-1.15338	3.79145	0.0752127	2.13257	-1.58229	5.46662	60.0088	9.79706e-07	8.47896e-05
AK000776	receptor tyrosine kinase-like orphan receptor 1	ROR1	4919	232060_at	-1.15914	2.1366	0.0795199	3.08883	-1.66529	5.48549	59.9671	9.82727e-07	8.47896e-05
AI082827	guanine nucleotide binding protein (G protein), alpha activating activity polypeptide, olfactory type	GNAL	2774	214071_at	-1.0929	1.36528	-0.98094	2.80692	-0.579518	4.91033	59.9666	9.82767e-07	8.47896e-05
NM_004692	internexin neuronal intermediate filament protein, alpha	INA	9118	204465_s_at	-0.462762	2.4043	-0.626378	2.30772	-1.45957	6.95506	59.8574	9.90719e-07	8.5262e-05
AK001419	feline leukemia virus subgroup C cellular receptor 1	FLVCR1	28982	222906_at	-2.44286	2.87218	-1.27882	1.95542	1.0344	7.46168	59.8439	9.91705e-07	8.5262e-05
AA017721	fucosyltransferase 9 (alpha (1,3) fucosyltransferase)	FUT9	10690	214046_at	-1.58219	0.180842	-1.80786	0.363808	2.48461	5.67703	59.8077	9.94364e-07	8.5262e-05
NM_014393	staufen, RNA binding protein, homolog 2 (Drosophila)	STAU2	27067	204226_at	-1.31231	-0.0880856	-1.35813	0.674856	1.79719	7.33449	59.7851	9.96032e-07	8.5262e-05
AU148611	---	---		215594_at	-0.451672	1.59048	-0.771123	2.32773	-1.11623	5.53539	59.7463	9.98897e-07	8.5262e-05
NM_017775	tetratricopeptide repeat domain 19	TTC19	54902	217964_at	-1.17768	0.85697	-1.29873	1.22508	0.941123	9.66354	59.7426	9.9917e-07	8.5262e-05
AW024563	gem (nuclear organelle) associated protein 5	GEMIN5	25929	225712_at	-1.03175	0.70967	-1.84978	0.438915	1.73577	7.94683	59.6742	1.00424e-06	8.55609e-05
AW025023	ribosomal protein S6 kinase, 90kDa, polypeptide 6	RPS6KA6	27330	228503_at	-0.925328	0.195805	-1.39199	1.00226	1.11988	6.13944	59.6286	1.00765e-06	8.57173e-05
BF979497	squalene epoxidase	SQLE	6713	213562_s_at	-1.28302	-0.714255	-1.41064	1.65876	1.35568	5.47049	59.5779	1.01144e-06	8.57749e-05
AA927701	heat shock 70kDa protein 9 (mortalin)	HSPA9	3313	200690_at	-1.46126	0.473544	-0.938042	1.27837	1.07652	7.77311	59.5776	1.01146e-06	8.57749e-05
BE644666	---	---		243275_at	-0.560887	3.01751	-0.401321	1.03293	-0.866022	4.62354	59.5397	1.01432e-06	8.58835e-05
BF447901	SH3-binding domain kinase 1	SBK1	388228	226549_at	-0.92041	1.55113	0.129965	1.18499	-0.473272	7.23702	59.451	1.02102e-06	8.63175e-05
BE886288	---	---		241687_at	-1.04234	0.491736	-0.811075	1.60423	0.349662	6.24501	59.4046	1.02456e-06	8.63864e-05
BE256479	heat shock 60kDa protein 1 (chaperonin)	HSPD1	3329	200806_s_at	-1.57589	-0.0557541	-3.03116	2.17086	2.168	10.4222	59.3747	1.02684e-06	8.63864e-05
NM_020156	core 1 synthase, glycoprotein-N-acetylgalactosamine 3-beta-galactosyltransferase, 1	C1GALT1	56913	219439_at	-1.77941	1.05227	-1.62618	1.88414	1.25668	7.94352	59.3571	1.02818e-06	8.63864e-05
NM_017835	chromosome 21 open reading frame 59	C21orf59	56683	218123_at	-1.21072	0.175406	-1.13206	1.45873	0.934475	8.98894	59.3416	1.02938e-06	8.63864e-05
BQ219651	---	---		1558078_at	-0.896922	1.52714	-1.09023	1.10879	0.375502	5.91123	59.3101	1.0318e-06	8.63864e-05
AK025416	UDP-glucose glycoprotein glucosyltransferase 1	UGGT1	56886	231968_at	-1.32749	1.14576	-0.71215	0.764082	0.910945	8.80495	59.3098	1.03182e-06	8.63864e-05
AK021556	---	---		232796_at	-0.930811	1.79516	-0.766901	1.5196	-0.169379	6.00668	59.2898	1.03336e-06	8.63864e-05
BE930017	fused in sarcoma	FUS	2521	1565716_at	0.122821	0.13567	-0.640974	1.64376	-0.836567	5.3789	59.06	1.05125e-06	8.74286e-05
AF152308	protocadherin alpha 1 /// protocadherin alpha 10 /// protocadherin alpha 11 /// protocadherin alpha 12 /// protocadherin alpha 13 /// protocadherin alpha 2 /// protocadherin alpha 3 /// protocadherin alpha 4 /// protocadherin alpha 5 /// protocadherin alpha 6 /// protocadherin alpha 7 /// protocadherin alpha 8 /// protocadherin alpha 9 /// protocadherin alpha subfamily C, 1 /// protocadherin alph…	PCDHA1 /// PCDHA10 /// PCDHA11 /// PCDHA12 /// PCDHA13 /// PCDHA2 /// PCDHA3 /// PCDHA4 /// PCDHA5 /// PCDHA6 /// PCDHA7 /// PCDHA8 /// PCDHA9 /// PCDHAC1 /// PCDHAC2		210674_s_at	-0.651634	2.60714	-0.812644	2.09056	-1.06936	4.92178	58.9193	1.0624e-06	8.80813e-05
AK023134	tudor domain containing 12	TDRD12	91646	215356_at	-0.767804	1.82762	-0.431663	3.59355	-1.94933	7.00037	58.8545	1.06758e-06	8.81667e-05
BE972639	---	---		243332_at	-0.938844	2.86066	-0.511281	1.17064	-0.454282	5.56383	58.8511	1.06785e-06	8.81667e-05
AW205919	Platelet-derived growth factor alpha polypeptide	PDGFA	5154	229830_at	-0.934752	3.13202	0.375515	3.08626	-2.41711	6.21172	58.8402	1.06873e-06	8.81667e-05
NM_005998	chaperonin containing TCP1, subunit 3 (gamma)	CCT3	7203	200910_at	-1.54543	0.772365	-0.963125	0.95662	1.29231	11.0828	58.6722	1.08232e-06	8.88706e-05
NM_024674	lin-28 homolog A (C. elegans)	LIN28A	79727	219823_at	-2.07915	5.37482	0.457485	5.40535	-3.62101	7.11576	58.6658	1.08284e-06	8.88706e-05
AI017564	WD repeat domain 67	WDR67	93594	214061_at	-1.58305	1.56351	-1.03883	1.48998	0.76111	6.4189	58.638	1.08511e-06	8.88706e-05
AI625022	family with sequence similarity 119, member A	FAM119A	151194	235177_at	-2.39	1.48263	-1.49189	1.56694	1.84576	7.52006	58.62	1.08659e-06	8.88706e-05
H10661	HIG1 hypoxia inducible domain family, member 1A	HIGD1A	25994	242317_at	-1.16736	0.423264	-1.80236	1.00798	1.55586	6.03079	58.6106	1.08735e-06	8.88706e-05
AI888657	TTC28 antisense RNA (non-protein coding)	TTC28-AS	284900	244189_at	-1.438	1.06027	-1.35878	1.5797	0.937295	6.8037	58.5948	1.08865e-06	8.88706e-05
NM_018123	asp (abnormal spindle) homolog, microcephaly associated (Drosophila)	ASPM	259266	219918_s_at	-2.3105	1.58148	-1.70118	2.22994	1.43084	8.08271	58.5403	1.09314e-06	8.9104e-05
AI224977	chromosome 12 open reading frame 48	C12orf48	55010	227928_at	-1.76809	1.20572	-1.69817	1.54337	1.46939	5.80908	58.4758	1.09848e-06	8.9302e-05
AA587884	6-phosphofructo-2-kinase/fructose-2,6-biphosphatase 2	PFKFB2	5208	226733_at	-1.22836	1.65176	-0.869915	2.68442	-0.531903	6.20379	58.4497	1.10065e-06	8.9302e-05
N50034	myelin expression factor 2	MYEF2	50804	229464_at	-2.18171	0.65557	-1.12409	2.05371	1.34344	7.28149	58.4125	1.10375e-06	8.9302e-05
AF139625	centromere protein J	CENPJ	55835	223513_at	-2.55352	0.493535	-1.45411	0.940352	2.73152	8.02576	58.3814	1.10635e-06	8.93805e-05
NM_013976	glutaryl-CoA dehydrogenase	GCDH	2639	208369_s_at	-1.40706	0.126901	-1.34768	0.934513	1.6402	6.69626	58.3101	1.11234e-06	8.94789e-05
AU154086	F-box protein 28	FBXO28	23219	1555971_s_at	-1.02051	1.71632	-1.76649	1.61111	0.551989	7.89161	58.2932	1.11376e-06	8.94789e-05
BC036012	tripartite motif-containing 37	TRIM37	4591	1554001_at	-1.02842	1.95806	-0.490901	0.935238	0.0795113	5.46635	58.258	1.11674e-06	8.94789e-05
AV723167	synaptotagmin I	SYT1	6857	203998_s_at	-1.6434	0.982064	-1.53642	-0.0430092	2.369	5.78403	58.2468	1.11769e-06	8.94789e-05
BE468066	rhabdomyosarcoma 2 associated transcript (non-protein coding)	RMST	196475	229782_at	-1.3992	4.14791	0.291063	3.62768	-2.59593	6.39031	58.1554	1.12548e-06	8.94789e-05
BG104571	transmembrane 9 superfamily member 3	TM9SF3	56889	222399_s_at	-0.109012	-0.0864085	-2.0072	0.0157725	1.46543	9.65047	58.1519	1.12577e-06	8.94789e-05
AF043294	budding uninhibited by benzimidazoles 1 homolog (yeast)	BUB1	699	209642_at	-2.17995	1.9433	-2.16419	2.92982	1.02176	7.39247	58.1462	1.12626e-06	8.94789e-05
NM_006555	YKT6 v-SNARE homolog (S. cerevisiae)	YKT6	10652	217785_s_at	-0.726959	-0.910291	-0.9456	0.658277	1.22194	5.90207	58.1295	1.1277e-06	8.94789e-05
BG291787	importin 7	IPO7	10527	200994_at	-1.44246	0.997961	-1.13201	1.24532	1.03427	10.6128	58.1288	1.12775e-06	8.94789e-05
BC040474	Rho guanine nucleotide exchange factor (GEF) 10	ARHGEF10	9639	1554703_at	-1.50453	3.14479	-0.851566	2.15514	-0.412782	6.24602	58.1022	1.13003e-06	8.94789e-05
AI735586	shisa homolog 3 (Xenopus laevis)	SHISA3	152573	229485_x_at	-0.580767	-0.144672	-0.316994	2.30737	-0.697928	4.30211	57.7907	1.15719e-06	9.13262e-05
NM_006759	UDP-glucose pyrophosphorylase 2	UGP2	7360	205480_s_at	-0.141835	2.28037	-1.19249	1.07489	-0.539888	10.8039	57.5623	1.17762e-06	9.26702e-05
NM_018482	ArfGAP with SH3 domain, ankyrin repeat and PH domain 1	ASAP1	50807	221039_s_at	-0.356953	-1.19655	-1.97879	0.769195	1.5622	6.80995	57.5332	1.18024e-06	9.27394e-05
BC005176	transmembrane 7 superfamily member 3	TM7SF3	51768	222477_s_at	-1.14582	0.375517	-1.6377	1.45022	1.14563	9.30466	57.515	1.18189e-06	9.27394e-05
AI732874	---	---		241314_at	-0.299778	0.54344	-0.678464	2.39197	-1.02371	6.37936	57.251	1.20615e-06	9.42992e-05
NM_003211	thymine-DNA glycosylase	TDG	6996	203743_s_at	-0.990057	0.855952	-0.937866	0.410417	1.05637	9.70271	57.2425	1.20695e-06	9.42992e-05
AL117417	splicing factor, arginine/serine-rich 15	SFRS15	57466	233753_at	-0.600974	0.493235	-0.649876	1.98299	-0.452179	4.9335	57.2142	1.20959e-06	9.43702e-05
NM_016542	serine/threonine protein kinase MST4	MST4	51765	218499_at	-2.35717	1.7448	-1.3714	1.15848	1.91752	9.64393	57.1102	1.21934e-06	9.48604e-05
AW008531	nucleoporin 205kDa	NUP205	23165	212247_at	-1.29127	1.07685	-1.3574	1.97307	0.521875	8.97745	57.0038	1.22942e-06	9.51816e-05
AA700633	---	---		237491_at	-0.576165	2.39426	-0.124024	0.962217	-0.780718	4.84275	56.9931	1.23044e-06	9.51816e-05
NM_003318	TTK protein kinase	TTK	7272	204822_at	-2.66844	1.82209	-0.545048	1.89838	1.15886	7.93093	56.9302	1.23646e-06	9.54504e-05
NM_024900	PHD finger protein 17	PHF17	79960	218517_at	-1.48357	3.03747	-0.316022	1.7449	-0.481508	9.0026	56.8657	1.24266e-06	9.54504e-05
AI204212	developmental pluripotency associated 2	DPPA2	151871	240301_at	-0.939721	3.13063	-0.221928	2.21851	-1.43488	5.49683	56.8021	1.24881e-06	9.57884e-05
BC005258	cell division cycle 23 homolog (S. cerevisiae)	CDC23	8697	223651_x_at	-1.16351	-0.250002	-1.2226	0.460789	1.75472	5.65877	56.7489	1.25399e-06	9.60285e-05
NM_014788	tripartite motif-containing 14	TRIM14	9830	203148_s_at	-2.40722	0.838449	-1.28088	1.28113	2.12757	7.3229	56.7338	1.25546e-06	9.60285e-05
AI924134	---	---		242787_at	-1.54782	0.261777	-1.75927	2.09208	1.23869	6.27379	56.562	1.27238e-06	9.67227e-05
NM_001325	cleavage stimulation factor, 3' pre-RNA, subunit 2, 64kDa	CSTF2	1478	204459_at	-1.13108	0.154177	-0.946453	1.47343	0.728372	7.6285	56.534	1.27516e-06	9.67227e-05
H16791	Fatty acyl CoA reductase 2	FAR2	55711	239108_at	-1.446	1.61202	-1.28448	2.68232	-0.023237	5.7605	56.5004	1.27851e-06	9.68425e-05
BC035108	---	---		1561341_at	-0.436899	3.26519	-0.238996	0.930964	-1.11281	5.69781	56.4189	1.28669e-06	9.73268e-05
NM_002764	phosphoribosyl pyrophosphate synthetase 1	PRPS1	5631	208447_s_at	-1.92962	0.406761	-2.0881	2.6299	1.43283	6.82491	56.269	1.30188e-06	9.77691e-05
[truncated: 205 more rows]

## Sheet: 9.UpPGCvs.ECC_IPS_ESC
Representative Public ID	Gene Title	Gene Symbol	Entrez Gene	ID	EGCvsREF	ESCvsREF	PGCvsREF	ECCvsREF	IPSCvsREF	AveExpr	F	P.Value	adj.P.Val
[truncated: 70 more rows]

[truncated: 3 more sheets: 10.UpECC_IPS_ESCvs.PGC, 11.UpPGCvs.All, 12.UpAllvs.PGC]
